# Supplementary material for: Educational disparities in hypertension, diabetes, obesity and smoking in Brazil: a trend analysis of 578 977 adults from a national survey, 2007–2018
Source: PubMed Central journal article supplement — BMJ Open. 2021 Jul 19;11(7):e046154. doi: 10.1136/bmjopen-2020-046154 (PMC8291309; doi:10.1136/bmjopen-2020-046154), 2021-07-19
Supplement: bmjopen-2020-046154.draft_revisions.pdf [file bmjopen-2020-046154.draft_revisions.pdf]

# BMJ Open

BMJ Open is committed to open peer review. As part of this commitment we make the peer review history of every article we publish publicly available.

When an article is published we post the peer reviewers' comments and the authors' responses online. We also post the versions of the paper that were used during peer review. These are the versions that the peer review comments apply to.

The versions of the paper that follow are the versions that were submitted during the peer review process. They are not the versions of record or the final published versions. They should not be cited or distributed as the published version of this manuscript.

BMJ Open is an open access journal and the full, final, typeset and author-corrected version of record of the manuscript is available on our site with no access controls, subscription charges or pay-per-view fees (<http://bmjopen.bmj.com>).

If you have any questions on BMJ Open's open peer review process please email [info.bmjopen@bmj.com](mailto:info.bmjopen@bmj.com)

# BMJ Open

## EDUCATIONAL DISPARITIES IN HYPERTENSION, DIABETES, OBESITY AND SMOKING IN BRAZIL: A TREND ANALYSIS OF 578,977 ADULTS FROM A NATIONAL SURVEY, 2007 TO 2018.

|                               |                                                                                                                                                                                                                                                                                                                                                                                                                                                                                                                                               |
|-------------------------------|-----------------------------------------------------------------------------------------------------------------------------------------------------------------------------------------------------------------------------------------------------------------------------------------------------------------------------------------------------------------------------------------------------------------------------------------------------------------------------------------------------------------------------------------------|
| Journal:                      | <i>BMJ Open</i>                                                                                                                                                                                                                                                                                                                                                                                                                                                                                                                               |
| Manuscript ID                 | bmjopen-2020-046154                                                                                                                                                                                                                                                                                                                                                                                                                                                                                                                           |
| Article Type:                 | Original research                                                                                                                                                                                                                                                                                                                                                                                                                                                                                                                             |
| Date Submitted by the Author: | 27-Oct-2020                                                                                                                                                                                                                                                                                                                                                                                                                                                                                                                                   |
| Complete List of Authors:     | Toteff Dulgherof, Pedro; Universidade Federal de Uberlandia, Faculdade de Medicina<br>da Silva, Luciana; Universidade Federal de Uberlandia, Faculdade de Medicina<br>Madalena Rinaldi, Ana Elisa; Universidade Federal de Uberlandia, Faculdade de Medicina<br>Rezende, Leandro; Universidade Federal de Sao Paulo, Medicina Preventiva<br>Souza Marques, Emanuele; Universidade do Estado do Rio de Janeiro, Instituto de Medicina Social<br>Azeredo, Catarina; Universidade Federal de Uberlandia - Campus Umuarama, Faculdade de Medicina |
| Keywords:                     | General diabetes < DIABETES & ENDOCRINOLOGY, Hypertension < CARDIOLOGY, EPIDEMIOLOGY, PUBLIC HEALTH, SOCIAL MEDICINE                                                                                                                                                                                                                                                                                                                                                                                                                          |
|                               |                                                                                                                                                                                                                                                                                                                                                                                                                                                                                                                                               |

SCHOLARONE™  
Manuscripts

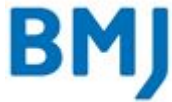

I, the Submitting Author has the right to grant and does grant on behalf of all authors of the Work (as defined in the below author licence), an exclusive licence and/or a non-exclusive licence for contributions from authors who are: i) UK Crown employees; ii) where BMJ has agreed a CC-BY licence shall apply, and/or iii) in accordance with the terms applicable for US Federal Government officers or employees acting as part of their official duties; on a worldwide, perpetual, irrevocable, royalty-free basis to BMJ Publishing Group Ltd ("BMJ") its licensees and where the relevant Journal is co-owned by BMJ to the co-owners of the Journal, to publish the Work in this journal and any other BMJ products and to exploit all rights, as set out in our [licence](#).

The Submitting Author accepts and understands that any supply made under these terms is made by BMJ to the Submitting Author unless you are acting as an employee on behalf of your employer or a postgraduate student of an affiliated institution which is paying any applicable article publishing charge ("APC") for Open Access articles. Where the Submitting Author wishes to make the Work available on an Open Access basis (and intends to pay the relevant APC), the terms of reuse of such Open Access shall be governed by a Creative Commons licence – details of these licences and which [Creative Commons](#) licence will apply to this Work are set out in our licence referred to above.

Other than as permitted in any relevant BMJ Author's Self Archiving Policies, I confirm this Work has not been accepted for publication elsewhere, is not being considered for publication elsewhere and does not duplicate material already published. I confirm all authors consent to publication of this Work and authorise the granting of this licence.

1  
2  
3  
4  
5  
6  
7  
8  
9  
10  
11  
12  
13  
14  
15  
16  
17  
18  
19  
20  
21  
22  
23  
24  
25  
26  
27  
28  
29  
30  
31  
32

**EDUCATIONAL DISPARITIES IN HYPERTENSION, DIABETES, OBESITY AND  
SMOKING IN BRAZIL: A TREND ANALYSIS OF 578,977 ADULTS FROM A  
NATIONAL SURVEY, 2007 TO 2018.**

33  
34  
35  
36  
37  
38  
39  
40  
41  
42  
43  
44  
45  
46  
47  
48  
49  
50  
51  
52  
53  
54  
55  
56  
57  
58  
59  
60

**Authors:**

Pedro Toteff Dulgheroff<sup>1</sup>, Luciana Saraiva da Silva<sup>1,2</sup>, Ana Elisa Madalena Rinaldi<sup>2</sup>, Leandro F. M. Rezende<sup>3</sup>, Emanuele Sousa Marques<sup>4</sup>, Catarina Machado Azeredo<sup>1,2</sup>

1. Programa de Pós-graduação em Saúde da Família, Faculdade de Medicina, Universidade Federal de Uberlândia.
2. Curso de Nutrição, Faculdade de Medicina, Universidade Federal de Uberlândia.
3. Departamento de Medicina Preventiva, Escola Paulista de Medicina, Universidade Federal de São Paulo, São Paulo, Brazil.
4. Instituto de Medicina Social, Universidade do Estado do Rio de Janeiro, Rio de Janeiro, Brazil.

**Corresponding Author:**

Catarina Machado Azeredo

Address: Av Pará, 1720, Bloco 2 U, bairro Umuarama, Uberlândia, Minas Gerais. Cep 38.405-320

E-mail: catarina.azeredo@yahoo.com.br

Telephone: +55 (34) 3225-8584

Fax: +55 (34) 3232-8620

1  
2  
3  
4 **EDUCATIONAL DISPARITIES IN HYPERTENSION, DIABETES, OBESITY AND**  
5  
6 **SMOKING IN BRAZIL: A TREND ANALYSIS OF 578,977 ADULTS FROM A**  
7  
8 **NATIONAL SURVEY, 2007 TO 2018.**  
9

10  
11  
12  
13 **ABSTRACT**  
14

15  
16 **Objectives:** The aim of our study was to assess social inequality trends for hypertension,  
17 diabetes mellitus, smoking and obesity from 2007 to 2018 in adults from Brazilian capitals.

18  
19 **Setting:** Data from the VIGITEL study, a cross-sectional telephone survey conducted annually  
20 from 2007 to 2018.  
21  
22

23 **Participants:** We used data from 578,977 Brazilian adults ( $\geq 18$  years).  
24

25 **Design:** Cross-sectional surveys conducted annually from 2007 to 2018.  
26

27 **Primary outcome measures:** Participants responded a questionnaire about medical diagnosis  
28 of hypertension and diabetes, their smoking status, weight and height. Educational inequalities  
29 by sex and skin color were assessed through absolute (slope index of inequality – SII) and relative  
30 measures of inequality (concentration index – CIX), and trends were tested by Prais-Winsten.  
31  
32

33 **Results:** All outcomes were more prevalent in the least educated. The largest absolute  
34 educational inequality was observed for hypertension ( $SII_{total} = -35.7$  in 2018). In 12 years, the  
35 total educational disparity remained constant for hypertension, increased for diabetes (absolute)  
36 and smoking (relative), and decreased for obesity (relative). Overall, inequality was higher  
37 among women and non-whites, compared to men and whites. We found a reduction in absolute  
38 inequality for hypertension among non-whites, an increase for diabetes in all strata, and an  
39 increase for smoking in women and non-whites. The relative inequality decreased in women  
40 and whites and increased for smoking in all strata, except among men.  
41  
42

43 **Conclusion:** The educational inequality reduced for obesity, remained constant for  
44 hypertension and increased for diabetes and smoking from 2007 to 2018 in Brazilian adults.  
45  
46

47 **Funding:** Brazilian National Council of Scientific and Technological Development (CNPq),  
48 404905/2016-1.  
49  
50  
51

52 **Keywords:** Inequality, Hypertension, Diabetes, Smoking, Obesity, Adults.  
53  
54  
55  
56  
57  
58  
59  
60

1  
2  
3  
4  
5  
6  
7  
8  
9  
10  
11  
12  
13  
14  
15  
16  
17  
18  
19  
20  
21  
22  
23  
24  
25  
26  
27  
28  
29  
30  
31  
32  
33  
34  
35  
36  
37  
38  
39  
40  
41  
42  
43  
44  
45  
46  
47  
48  
49  
50  
51  
52  
53  
54  
55  
56  
57  
58  
59  
60

### Strengths and limitations of this study

- We assessed the extent and trend of socioeconomic inequalities in major NCD (hypertension and diabetes) and its risk factors (smoking and obesity) over 12 years in a middle-income country;
- We used large representative samples from Brazilian adults living in the 27 state Capitals in Brazil;
- We assessed educational inequalities in total sample and in subgroups of sex and race/color using complex measures of inequality.
- Using data from a telephone Survey (VIGITEL) limited our generalizability to those with landlines we would expect some small differences in the prevalence of our risk factors if we had assessed a sample that was not limited by landline access.
- The use of self-reported diseases may have affected our results underestimating inequality in hypertension and diabetes, as it may have underestimated the prevalence among least favored groups.

## INTRODUCTION

Chronic non-communicable diseases (NCD) are the main cause of death in Brazil<sup>1</sup> and worldwide<sup>2</sup>. According to the Global Burden of Diseases, Injuries, and Risk Factors Study, in 2017, the four main risk factors for mortality and years of life lost due to disability in Brazil were systemic arterial hypertension, diabetes *mellitus*, obesity and smoking<sup>3</sup>. Importantly, these risk factors affect the less economically favored groups in a more pronounced way<sup>4-6</sup>, in addition to reinforcing poverty and income inequality by generating an increase in direct and indirect spending and loss of productivity<sup>7</sup>. The synthesis of 283 studies in low- and middle-income countries showed a positive association between low income, low socioeconomic status and low educational level with the occurrence of NCDs<sup>8</sup>. In Brazil, adults with less education, non-whites and without health insurance had a higher prevalence of risk factors for NCD, such as smoking, leisure with physical inactivity, physical inactivity and less consumption of fruits and vegetables<sup>9</sup>.

Trend analysis of the risk factors for NCD in Brazil showed that the prevalence of hypertension remained stable between 2006 and 2018, while diabetes and obesity grew and smoking dropped<sup>10</sup>. However, this trend did not occur homogeneously among social strata. Between 1998 and 2013, there was a reduction in educational inequalities for hypertension and coronary heart disease and an increase in inequality for diabetes in Brazilian adults<sup>5</sup>. An American study showed an increase in inequality between 1999 and 2014 for cardiovascular risk, maintaining the percentage of people at high cardiovascular risk in the low-income population and a significant reduction in those with higher income<sup>11</sup>.

A sustained reduction in health inequities between countries is necessary<sup>8</sup>. However, trend studies on social inequality in the different risk factors for NCD that are essential for health planning are scarce in Brazil<sup>5</sup>, especially assessing risk factors concomitantly and based on educational disparities, also considering sex and color strata. Therefore, our aim was to assess social inequality trends for hypertension, diabetes, smoking and obesity among adults



1  
2  
3  
4 from Brazilian state capitals, from 2007 to 2018. We also performed subgroup analysis for  
5 education inequalities for the outcomes by skin color and sex.  
6  
7

## 8 **METHODS**

### 9 **Study design and source of data and sample**

10  
11  
12  
13 This study used data collected by the Surveillance of Risk and Protection Factors for  
14 Chronic Diseases by Telephone Survey (VIGITEL), coordinated by the Ministry of Health of  
15 Brazil, from 2007 to 2018. VIGITEL is a cross-sectional system for monitoring the health of  
16 the adult population – over 18 years old, residing in the Brazilian capitals and the Federal  
17 District (DF), and who have a landline telephone – carried out annually since 2006. The sample  
18 stratification took place by telephone prefix until 2011, and subsequently by postal code (CEP).  
19  
20 In order to reduce possible biases due to the partial coverage of the population by the landline  
21 telephone system, VIGITEL assigned a final weight to each individual, considering the inverse  
22 of the number of telephone lines in the household interviewed, the number of adults living in  
23 the household and the socio-demographic composition of the sample, based on the 2000 and  
24 2010 demographic censuses. This weighting ensured the representativeness for the general  
25 adult population of each city in all years<sup>10</sup>.  
26  
27  
28  
29  
30  
31  
32  
33  
34  
35  
36  
37  
38  
39  
40

41 Data from 625,070 individuals interviewed between 2007 and 2018 were initially  
42 obtained. We excluded women who were pregnant and those who had doubts if they were or  
43 were not pregnant by the time of the interview (5,087 women); people aged 80 or older (22,234  
44 individuals) because aging may affect self-reports<sup>12</sup>; people who did not want to or did not  
45 know how to respond to their skin color (20,699 respondents) and without body mass index  
46 (BMI) data (n=3). These exclusions resulted in a loss of 46,093 (7.4%) observations when  
47 compared to the original study. Thus, 578,977 participants were included in this study.  
48  
49  
50  
51  
52  
53  
54  
55  
56

57 All data of the participants were self-reported. They answered about previous medical  
58 diagnosis of hypertension and diabetes (all types), if they were current smokers (yes/no) and  
59  
60

1  
2  
3  
4 their weight and height, used to calculate the Body Mass Index (IMC). We considered  
5  
6  $IMC \geq 30 \text{ kg/m}^2$  for obesity<sup>13</sup>. Risk factors were described according to the number of years of  
7  
8 study (divided into 4 categories: 0-3 years of study, 4-8 years, 9-11 years and 12 or more years  
9  
10 of study), sex (women and men) and skin color (white and non-white). Skin color also was self-  
11  
12 reported and included the categories: white (used for white color) and black, dark, brown, mixed  
13  
14 race, yellow, red and indigenous (used for non-white skin color).  
15  
16  
17  
18  
19

### 20 **Statistical analysis**

21  
22  
23 Prevalence of the four risk factors (2007-2018) was adjusted for age based on the year  
24  
25 2018. We estimated complex measures of inequality such as the slope index of inequality (SII)  
26  
27 and the concentration index (CIX) and their 95% confidence interval. Both indicators were  
28  
29 calculated according to the World Health Organization<sup>14</sup> and Barros et al.<sup>15</sup>. While the SII  
30  
31 represents the absolute difference between the less (0-3 years of study) and the most favored  
32  
33 groups (12 or more years of study), the CIX assesses the relative difference between them.  
34  
35 Results equal to zero represent a situation of total equality. When it is equal +1 or -1, we have  
36  
37 the greater inequality possible. Negative values indicates a higher prevalence of the risk factor  
38  
39 in the least favored group, while positive ones represents greater prevalence in those most  
40  
41 favored groups. The results of SII and CIX were multiplied by 100 to facilitate their  
42  
43 visualization in tables and graphs, ranging from -100 to +100. On this scale, CIX values less  
44  
45 than -20 or greater than 20 can be considered relevant indicators of inequality<sup>14</sup>.  
46  
47  
48  
49

50  
51 The different levels of education were used to calculate the total SII and CIX.  
52  
53 Subsequently, the SII and CIX data for schooling were stratified by sex and skin color. The  
54  
55 time trend of the indicators was analyzed by linear regression using the Prais-Winsten method  
56  
57 <sup>16</sup>. Statistical analyses were performed using the STATA/SE<sup>®</sup> 15.1 software.  
58  
59

### 60 **Ethical aspects**

VIGITEL was approved by the National Research Ethics Commission (CONEP). The VIGITEL database is in the public domain and does not allow identification of participants. It is available at the electronic address: <http://svs.aids.gov.br/download/Vigitel/>. The waiver of ethical review was approved by the Research Ethics Committee of the Federal University of Uberlândia, Minas Gerais (CAAE: 2,654,271).

### **Role of the funding source**

This research received financial support from Brazilian National Council of Scientific and Technological Development (CNPq), 404905/2016-1, awarded to Catarina Machado Azeredo. The study sponsor was not involved in the design of the study; the collection, analysis, and interpretation of data; writing the report; or the decision to submit the report for publication.

### **RESULTS**

From 2007 to 2018, the profile of individuals evaluated remained similar, with 40 years as the mean age and similar distribution between sexes and skin color (53.2% female and 55.6% non-white in 2018). The average number of years of study showed a significant increase in the period, going from 9.4 to 10.7 years of study. The prevalence of hypertension remained constant in the period (34.1% in 2007 to 33.3% in 2018), with a reduction in smoking (from 13.0% to 7.4%), while the prevalence of diabetes (8.9% to 10.6%) and obesity increased (14.7% to 20.0%) (Table 1).

An important educational gradient was observed for all risk factors, with a higher prevalence among those with less education. The largest educational discrepancy was observed for diabetes and the smallest for smoking, with slight variations over the period (Figure 1). In 2018, for example, the prevalence of risk factors in adults with less education (0-3 years of study) was 28.4% for obesity, 60.7% for hypertension, 24.4% for diabetes and 9.0% for

1  
2  
3  
4 smoking. On the other hand, in adults with 12 years or more of study the prevalence rates were  
5  
6 16.8% for obesity, 23.8% for hypertension, 6.4% for diabetes and 5.6% for smoking.  
7

8  
9 Hypertension, diabetes, and obesity were more prevalent in women than in men, while  
10  
11 smoking prevalence was higher in men. The prevalence of outcomes was higher in non-whites  
12  
13 compared to whites for hypertension and obesity, and lower for diabetes and smoking.  
14  
15 Supplementary tables 1 to 4 show the age-adjusted prevalence of each outcome by years of  
16  
17 study and stratified by sex and skin color.  
18  
19

20  
21 Table 2 shows the absolute (SII) and relative (CIX) measures of educational inequality  
22  
23 for the four outcomes. Negative SII and CIX values for all risk factors reaffirm their higher  
24  
25 prevalence among groups with less education.  
26

27  
28 The absolute and relative educational inequality for hypertension, diabetes and obesity  
29  
30 was, in general, higher among women than men and higher in non-white individuals compared  
31  
32 to whites, represented by negative and higher SII and CIX values (Figures 2 and 3). The  
33  
34 exceptions were for the SII in smoking, as inequality was higher in men, being important to  
35  
36 note that CIX reversed its trend of higher inequality in men in 2007, for women in 2018. Obesity  
37  
38 showed higher absolute and relative inequality among whites (Figure 3). Over the period, there  
39  
40 was a reduction in absolute inequality in hypertension only among non-whites (Figure 2). The  
41  
42 relative inequality remained constant, being higher in women than in men and in non-whites in  
43  
44 relation to whites (Figure 2). The absolute inequality in diabetes had a statistically significant  
45  
46 increase in all strata (Figure 2). This increase was greater in men than in women, as well as in  
47  
48 whites in relation to non-whites. The relative inequality in diabetes remained constant over the  
49  
50 period (Figure 2). The absolute inequality for obesity remained constant, although there was a  
51  
52 reduction in the relative inequality for the total sample, between women and non-whites  
53  
54 (Figure 3). There was an increase in absolute inequality in smoking between whites and women  
55  
56  
57  
58  
59  
60

1  
2  
3  
4 in the analyzed period. The relative inequality in smoking increased in all strata, except among  
5  
6 men, where it remained constant (Figure 3).  
7  
8  
9

## 10 **DISCUSSION**

11  
12  
13 In our study, diabetes, hypertension, obesity, and smoking remained more prevalent in  
14  
15 the less educated groups from 2007 to 2018 in Brazil. The absolute and relative educational  
16  
17 inequalities were higher among women and non-whites, compared to men and whites.  
18  
19 Hypertension was the risk factor that had the highest absolute educational inequality, which  
20  
21 decreased only among non-whites in the period; the absolute educational inequality for diabetes  
22  
23 increased in all strata. The absolute educational inequality remained constant for obesity,  
24  
25 although the relative one has reduced for the total sample, among women and non-whites. There  
26  
27 was an increase in the absolute educational inequality for smoking among women and whites  
28  
29 and relative educational inequality for all strata, except for men where it remained constant.  
30  
31  
32  
33

34  
35 Hypertension had the highest educational inequality, which remained constant in the  
36  
37 period, except for the reduction among non-whites. On the other hand, educational inequality  
38  
39 for diabetes increased in this period in all strata. Trend analysis of prevalence of diabetes,  
40  
41 hypertension and heart disease from 1998 to 2013 also found an increase in diabetes disparities  
42  
43 among a representative sample of Brazilian adults<sup>5</sup>. It is possible that strategies such as the  
44  
45 Brazilian National Policy for the Comprehensive Health of the Black Population<sup>17</sup>, could have  
46  
47 contributed to reduce race inequality by decreasing the prevalence of hypertension among non-  
48  
49 whites. However, if this is true, we would expect to find a reduction in race inequality for  
50  
51 diabetes. There are several potential explanations for the increase in educational gap for  
52  
53 diabetes. This could have been partially driven by our finding of an increase in obesity  
54  
55 prevalence over time, and higher prevalence among those less educated. Obesity is a risk factor  
56  
57 stronger for diabetes than for hypertension<sup>18 19</sup>. It is also possible that the increase in primary  
58  
59  
60

1  
2  
3  
4 care coverage has provided access to health care and, consequently, increased the diagnosis of  
5 diabetes among those underprivileged (i.e., therefore, artificially increasing the diabetes  
6 inequality). The National Program for Improving Access and Quality in Primary Care and the  
7 Requalification Program for Basic Health Units (*Programa Nacional de Melhoria do Acesso e*  
8 *da Qualidade da Atenção Básica -PMAQ*), created in 2011, as well as the More Doctors for  
9 Brazil Project (*Mais Médicos para o Brasil*), created in 2013, increased the number of health  
10 units and physicians' access to more than 65 million people<sup>20</sup>. If that was the case, we would  
11 expect increase in social inequality for hypertension too<sup>21</sup>. Unless the requirement of fewer  
12 medical supplies for hypertension diagnosis compared to diabetes<sup>21</sup> causes less underreport for  
13 hypertension and, therefore, benefits less from the extension in primary care coverage not  
14 affecting the inequality.

15  
16  
17  
18  
19  
20  
21  
22  
23  
24  
25  
26  
27  
28  
29  
30  
31  
32  
33  
34  
35  
36  
37  
38  
39  
40  
41  
42  
43  
44  
45  
46  
47  
48  
49  
50  
51  
52  
53  
54  
55  
56  
57  
58  
59  
60  
The increase in obesity prevalence over time, especially among the less educated group, have been reported in other countries<sup>22</sup>. This can be explained by the lower financial access to healthy food in addition to fewer opportunities to engage in leisure physical activities<sup>23</sup>. Some small progress was found with a reduction on the relative educational inequality for obesity in the total sample, women and non-whites. Nonetheless, Brazil still lacks strong initiatives to protect the more vulnerable groups and tackle the social inequalities for obesity such as regulation of nutritional labelling claims and health warnings, advertising restrictions, protection of the food school environment and taxation of unhealthy food<sup>24</sup>, jointly with a broad promotion of active commuting and availability of public spaces for physical activity<sup>25</sup>.

Our results confirm the global decrease trend in smoking prevalence<sup>26</sup>, with a sharper reduction among the more educated adults<sup>27</sup>. This explained the increase in the relative educational inequality in most strata, except among men. Several actions have been taken to halt smoking, such as the ratification of the World Health Organization Framework Convention

on Tobacco Control in 2005, which resulted in the Brazilian National Tobacco Control Policy<sup>28</sup>. These policies may have had less impact on less educated people<sup>29</sup>, increasing social inequality. Although actions, such as the taxation of tobacco products, immediately affect low-income individuals, over time they resort to the illegal market, maintaining the cigarette use. Recent work shows that, in Brazil, the illegal cigarette market grew from 28.6% in 2012 to 42.8% in 2016<sup>30</sup>. Moreover, most actions aimed at changing behavior in favor of smoking cessation are educational, requiring cognitive skills for better understanding and, thus, more educated people will benefit more from these interventions<sup>31</sup>. In addition, tobacco companies have intensified marketing strategies to reach vulnerable populations, such as women<sup>32</sup>, which may also justify the higher inequality in this group.

Educational inequality for risk factors for NCDs has disproportionately affected women and non-whites in Brazil. Although women have had more schooling than men in Brazil, their average income has been lower<sup>33</sup>. Illiteracy among women aged 15 years and over non-white was more than double that of white women (10.2% and 4.9%, respectively). Although there was an improvement in the education of the non-white adult population with 12 or more years of study between 1995 and 2015 (from 3.3 to 12%), this percentage among whites was more than two-fold higher in 2015 (25.9%)<sup>33</sup>. In Brazil, unlike other countries, social inequality drives racial disparities<sup>34</sup>. Black people have less access to health care, less quality of health care and are less informed about health promotion and disease prevention<sup>35</sup>.

We found punctual reduction in the disparities for hypertension and obesity, and an increase in disparities for diabetes and smoking, that are all modifiable risk factors sensitive to strategies promoting health lifestyle<sup>36</sup>. Accordingly, policies targeting the vulnerable groups, such as income redistribution<sup>37</sup>, a strong and broad social security system and health education and promotion, would avoid the reinforcement of the current inequalities<sup>8</sup> and bring better health outcomes for Brazilians. In the last decades, Brazil has adopted several policies that

could mitigate socioeconomic inequalities, with the potential to alter the prevalence of risk factors for NCDs, such as the expansion of primary health care, through the Family Health Strategy, and conditional cash transfer, through Bolsa Família Program. These policies increased the access of the low-income population to health promotion and disease prevention actions<sup>38 39</sup>. Launched in 2011 by the Minister of Health of Brazil, the Strategic Action Plan for Tracking Chronic Non-Communicable Diseases in Brazil has made advances in surveillance (eg. national surveys and monitoring of mortality and risk factor reduction targets); health promotion (eg. encouragement of physical activity, adequate nutrition and health promotion through the creation of the Health Gym Program); regulation (eg. legislation on tobacco-free environments); and health care (eg. free of charge drugs for hypertension, diabetes, and asthma; organization of the emergency service network for cardiovascular diseases)<sup>40</sup>. Despite efforts, limited advances have been achieved. Health inequality is a persistent phenomenon<sup>41</sup>. Moreover, since 2014, Brazil has been facing an economic crisis and recently adopted austerity policies that could negatively impact health inequality trends<sup>42</sup>.

Our results may serve as a starting point for new studies that can deepen into the causes that led to the reductions in educational inequalities observed for hypertension and obesity. Future studies also need to understand the reasons for an increase in educational inequality for diabetes and smoking.

Our study has some limitations. VIGITEL survey collected data only from the population that has landlines and included only the adults living in Brazilian capitals and the federal district. Despite using weighting measures for the general population, we would expect some small differences in the prevalence of our risk factors if we had assessed a sample that was not limited by landline access<sup>43</sup>. Over time, the access to landlines has reduced, and older and wealthier households are more likely to have and retain a landline in addition to a mobile phone. Therefore, the set of those contacted in a landline-only survey will increasingly skew



1  
2  
3  
4 towards those older/ wealthier groups. This may have underestimated the prevalence of NCDs  
5 risk factors in those places with less landlines access <sup>44</sup>. Future studies need to assess social  
6 inequality for NCDs in rural areas<sup>8</sup>. In addition, risk factors were self-reported and may be  
7 underestimated, especially medical diagnosis of diabetes and hypertension. This may have  
8 affected our results underestimating inequality in hypertension and diabetes, as it may have  
9 underestimated the prevalence among least favored groups.  
10  
11  
12  
13  
14  
15  
16  
17

18 In conclusion, we observed a reduction in educational gap for hypertension and obesity  
19 and an increase for diabetes mellitus and smoking from 2007 to 2018. Absolute educational  
20 inequality for hypertension decreased between non-whites, and relative inequality decreased  
21 for obesity in general and among women and non-whites. The absolute educational inequality  
22 increased for diabetes in all strata and increased for smoking in almost all strata, in relative and  
23 absolute forms.  
24  
25  
26  
27  
28  
29  
30  
31

### 32 33 **CONFLICT OF INTEREST**

34  
35 The authors declare no conflict of interest.  
36  
37

### 38 39 **CONTRIBUTION STATEMENT**

40  
41  
42 P.T.D. contributed to data analysis and interpretation and to drafting and revising the  
43 manuscript and figures. C.M.A., L.S.S., A.E.M.R. L.F.M.R. and E.S.M. contributed to study  
44 concept and design, data interpretation, revising the manuscript and figures, and final approval  
45 of the version submitted.  
46  
47

### 48 49 **REFERENCE**

- 50  
51  
52 1. Malta DC, Andrade S, Oliveira TP, et al. Probability of premature death for chronic non-  
53 communicable diseases, Brazil and Regions, projections to 2025. *Rev Bras Epidemiol*  
54 2019;22:e190030. doi: 10.1590/1980-549720190030 [published Online First:  
55 2019/04/04]  
56 2. Global, regional, and national age-sex specific mortality for 264 causes of death, 1980-  
57 2016: a systematic analysis for the Global Burden of Disease Study 2016. *Lancet*  
58 2017;390(10100):1151-210. doi: 10.1016/s0140-6736(17)32152-9 [published Online  
59 First: 2017/09/19]  
60

3. Collaborators GBDRF. Global, regional, and national comparative risk assessment of 84 behavioural, environmental and occupational, and metabolic risks or clusters of risks for 195 countries and territories, 1990-2017: a systematic analysis for the Global Burden of Disease Study 2017. *Lancet* 2018;392(10159):1923-94. doi: 10.1016/S0140-6736(18)32225-6 [published Online First: 2018/11/30]
4. Zhao D, Post WS, Blasco-Colmenares E, et al. Racial Differences in Sudden Cardiac Death. *Circulation* 2019;139(14):1688-97. doi: 10.1161/CIRCULATIONAHA.118.036553 [published Online First: 2019/02/05]
5. Beltran-Sanchez H, Andrade FC. Time trends in adult chronic disease inequalities by education in Brazil: 1998-2013. *Int J Equity Health* 2016;15(1):139. doi: 10.1186/s12939-016-0426-5 [published Online First: 2016/11/18]
6. Strong K, Mathers C, Leeder S, et al. Preventing chronic diseases: how many lives can we save? *Lancet* 2005;366(9496):1578-82. doi: 10.1016/s0140-6736(05)67341-2 [published Online First: 2005/11/01]
7. Nugent R, Bertram MY, Jan S, et al. Investing in non-communicable disease prevention and management to advance the Sustainable Development Goals. *Lancet* 2018;391(10134):2029-35. doi: 10.1016/s0140-6736(18)30667-6 [published Online First: 2018/04/09]
8. Niessen LW, Mohan D, Akuoku JK, et al. Tackling socioeconomic inequalities and non-communicable diseases in low-income and middle-income countries under the Sustainable Development agenda. *Lancet* 2018;391(10134):2036-46. doi: 10.1016/S0140-6736(18)30482-3 [published Online First: 2018/04/09]
9. de Azevedo Barros MB, Lima MG, Medina LP, et al. Social inequalities in health behaviors among Brazilian adults: National Health Survey, 2013. *Int J Equity Health* 2016;15(1):148. doi: 10.1186/s12939-016-0439-0 [published Online First: 2016/11/18]
10. Brasil. Vigitel Brasil 2018: vigilância de fatores de risco e proteção para doenças crônicas nas capitais dos 26 estados brasileiros e o Distrito Federal em 2018. In: transmissíveis DdAeSeVdDn, ed. Brasília: Ministério da Saúde, 2019:132.
11. Odutayo A, Gill P, Shepherd S, et al. Income Disparities in Absolute Cardiovascular Risk and Cardiovascular Risk Factors in the United States, 1999-2014. *JAMA Cardiol* 2017;2(7):782-90. doi: 10.1001/jamacardio.2017.1658 [published Online First: 2017/06/09]
12. Knäuper B, Carrière K, Chamandy M, et al. How aging affects self-reports. *Eur J Ageing* 2016;13:185-93.
13. WHO. Obesity: preventing and managing the global epidemic. Report of a WHO Consultation. In: Series WTR, ed. Geneva: WHO, World Health Organization, 2000.
14. WHO. Handbook on health inequality monitoring: with a special focus on low- and middle-income countries. Geneva: WHO press, 2013:105.
15. Barros AJ, Victora CG. Measuring coverage in MNCH: determining and interpreting inequalities in coverage of maternal, newborn, and child health interventions. *PLoS Med* 2013;10(5):e1001390. doi: 10.1371/journal.pmed.1001390 [published Online First: 2013/05/15]
16. Antunes JLF, Cardoso MRA. Uso da análise de séries temporais em estudos epidemiológicos. *Epidemiologia e Serviços de Saúde* 2015;24:565-76.
17. Brasil. Política Nacional de Saúde Integral da População Negra: uma política do SUS. In: Saúde Md, ed. Brasília, 2017:44.

18. Guh DP, Zhang W, Bansback N, et al. The incidence of co-morbidities related to obesity and overweight: A systematic review and meta-analysis. *BMC Public Health* 2009;9(1):88. doi: 10.1186/1471-2458-9-88
19. Lanas F, Seron P. Diverging trends in obesity, diabetes, and raised blood pressure in the Americas. *The Lancet Global Health* 2020;8(1):e18-e19. doi: 10.1016/S2214-109X(19)30503-0
20. Facchini LA, Tomasi E, Dilélio AS. Qualidade da Atenção Primária à Saúde no Brasil: avanços, desafios e perspectivas. *Saúde em Debate* 2018;42:208-23.
21. Brasil. Cadernos de atenção básica n.35. Estratégias para o cuidado da pessoa com doença crônica. In: Saúde Md, ed. Brasília: Ministério da Saúde, 2014:162.
22. Hulsegge G, Picavet HS, Blokstra A, et al. Today's adult generations are less healthy than their predecessors: generation shifts in metabolic risk factors: the Doetinchem Cohort Study. *Eur J Prev Cardiol* 2014;21(9):1134-44. doi: 10.1177/2047487313485512 [published Online First: 2013/04/12]
23. Malta DC, Santos MAS, Andrade SSCdA, et al. Tendência temporal dos indicadores de excesso de peso em adultos nas capitais brasileiras, 2006-2013. *Ciência & Saúde Coletiva* 2016;21:1061-69.
24. Huang TT, Cawley JH, Ashe M, et al. Mobilisation of public support for policy actions to prevent obesity. *Lancet* 2015;385(9985):2422-31. doi: 10.1016/s0140-6736(14)61743-8 [published Online First: 2015/02/24]
25. Malta DC, Barbosa da Silva J. Políticas to promote physical activity in Brazil. *Lancet* 2012;380(9838):195-6. doi: 10.1016/s0140-6736(12)61041-1 [published Online First: 2012/07/24]
26. Bruthans J, Mayer O, Jr., De Bacquer D, et al. Educational level and risk profile and risk control in patients with coronary heart disease. *Eur J Prev Cardiol* 2016;23(8):881-90. doi: 10.1177/2047487315601078 [published Online First: 2015/08/19]
27. Eliasson M, Eriksson M, Lundqvist R, et al. Comparison of trends in cardiovascular risk factors between two regions with and without a community and primary care prevention programme. *Eur J Prev Cardiol* 2018;25(16):1765-72. doi: 10.1177/2047487318778349 [published Online First: 2018/05/31]
28. Cavalcante TM, Pinho MCMd, Perez CdA, et al. Brasil: balanço da Política Nacional de Controle do Tabaco na última década e dilemas. *Cadernos de Saúde Pública* 2017;33
29. Bazotti A, Finokiet M, Conti IL, et al. Tabagismo e pobreza no Brasil: uma análise do perfil da população tabagista a partir da POF 2008-2009. *Ciência & Saúde Coletiva* 2016;21:45-52.
30. Szklo A, Iglesias RM, Carvalho de Souza M, et al. Trends in Illicit Cigarette Use in Brazil Estimated From Legal Sales, 2012-2016. *Am J Public Health* 2018;108(2):265-69. doi: 10.2105/ajph.2017.304117 [published Online First: 2017/12/22]
31. Silva STd, Martins MC, Faria FRd, et al. Combate ao Tabagismo no Brasil: a importância estratégica das ações governamentais. *Ciência & Saúde Coletiva* 2014;19:539-52.
32. Doku D. The tobacco industry tactics-a challenge for tobacco control in low and middle income countries. *Afr Health Sci* 2010;10(2):201-3. [published Online First: 2011/02/18]
33. IPEA. Retrato das Desigualdades de Gênero e Raça-1995 a 2015 4ed. Brasília: IPEA, 2011:39.
34. Victora C. Socioeconomic inequalities in Health: Reflections on the academic production from Brazil. *Int J Equity Health* 2016;15(1):164. doi: 10.1186/s12939-016-0456-z [published Online First: 2016/11/18]
35. IFMSA. IFMSA Policy Document Ethnicity and Health. Montreal, Canada: IFMSA, 2018.

- 1  
2  
3  
4  
5  
6  
7  
8  
9  
10  
11  
12  
13  
14  
15  
16  
17  
18  
19  
20  
21  
22  
23  
24  
25  
26  
27  
28  
29  
30  
31  
32  
33  
34  
35  
36  
37  
38  
39  
40  
41  
42  
43  
44  
45  
46  
47  
48  
49  
50  
51  
52  
53  
54  
55  
56  
57  
58  
59  
60
36. Piepoli MF, Hoes AW, Agewall S, et al. 2016 European Guidelines on cardiovascular disease prevention in clinical practice: The Sixth Joint Task Force of the European Society of Cardiology and Other Societies on Cardiovascular Disease Prevention in Clinical Practice (constituted by representatives of 10 societies and by invited experts) Developed with the special contribution of the European Association for Cardiovascular Prevention & Rehabilitation (EACPR). *Eur Heart J* 2016;37(29):2315-81. doi: 10.1093/eurheartj/ehw106 [published Online First: 2016/05/26]
  37. Xie X, Wu Q, Hao Y, et al. Identifying determinants of socioeconomic inequality in health service utilization among patients with chronic non-communicable diseases in China. *PLoS One* 2014;9(6):e100231. doi: 10.1371/journal.pone.0100231 [published Online First: 2014/06/25]
  38. de Sousa MF. [The Family Health Program in Brazil: analysis of access to basic care]. *Rev Bras Enferm* 2008;61(2):153-8. doi: 10.1590/s0034-71672008000200002 [published Online First: 2008/06/25]
  39. Santos LMP, Costa AM, Girardi SN. Programa Mais Médicos: uma ação efetiva para reduzir iniquidades em saúde. *Ciência & Saúde Coletiva* 2015;20:3547-52.
  40. Malta DC, Oliveira TP, Santos MAS, et al. Avanços do Plano de Ações Estratégicas para o Enfrentamento das Doenças Crônicas não Transmissíveis no Brasil, 2011-2015. *Epidemiol Serv Saúde* 2016;25
  41. Mackenbach JP, Valverde JR, Artnik B, et al. Trends in health inequalities in 27 European countries. *Proc Natl Acad Sci U S A* 2018;115(25):6440-45. doi: 10.1073/pnas.1800028115 [published Online First: 2018/06/06]
  42. Oreiro JL. A grande recessão brasileira: diagnóstico e uma agenda de política econômica. *Estudos Avançados* 2017;31:75-88.
  43. Bernal RTI, Malta DC, Claro RM, et al. Effect of the inclusion of mobile phone interviews to Vigitel. *Rev Saude Publica* 2017;51(suppl 1):15s. doi: 10.1590/s1518-8787.2017051000171 [published Online First: 2017/06/08]
  44. Bernal RTI, Malta DC, de Araújo TS, et al. Inquérito por telefone: pesos de pós-estratificação para corrigir vícios de baixa cobertura em Rio Branco, AC. *Rev Saúde Pública* 2013;47(2):316-25

**Table 1:** Sociodemographic characteristics and risk factor prevalence, according to survey year of VIGITEL (2007-2018).

| Characteristics    | Survey year |        |        |        |        |        |        |        |        |        |        |        |
|--------------------|-------------|--------|--------|--------|--------|--------|--------|--------|--------|--------|--------|--------|
|                    | 2007        | 2008   | 2009   | 2010   | 2011   | 2012   | 2013   | 2014   | 2015   | 2016   | 2017   | 2018   |
| Individuals (n)    | 54,271      | 52,641 | 52,726 | 52,628 | 51,656 | 40,374 | 45,889 | 34,991 | 49,919 | 46,488 | 48,931 | 48,463 |
| Mean age (years)   | 39.8        | 39.9   | 40.2   | 40.3   | 40.4   | 40.1   | 40.2   | 40.2   | 40.9   | 40.7   | 41.4   | 41.7   |
| Education (years)  | 9.4         | 9.4    | 9.6    | 9.8    | 9.9    | 10.3   | 10.4   | 10.6   | 10.5   | 10.8   | 10.6   | 10.7   |
| Sex (%)            |             |        |        |        |        |        |        |        |        |        |        |        |
| Female             | 53.2        | 53.3   | 53.3   | 53.2   | 53.2   | 53.3   | 53.4   | 53.4   | 53.1   | 53.3   | 53.3   | 53.2   |
| Male               | 46.8        | 46.7   | 46.7   | 46.8   | 46.8   | 46.7   | 46.6   | 46.6   | 46.9   | 46.7   | 46.7   | 46.8   |
| Skin color (%)     |             |        |        |        |        |        |        |        |        |        |        |        |
| White              | 40.8        | 39.0   | 39.1   | 39.8   | 43.9   | 43.5   | 45.0   | 43.6   | 41.2   | 46.2   | 45.0   | 44.4   |
| Non-white          | 59.2        | 61.0   | 60.9   | 60.2   | 56.1   | 56.5   | 55.0   | 56.4   | 58.8   | 53.8   | 55.0   | 55.6   |
| Risk factors (%) + |             |        |        |        |        |        |        |        |        |        |        |        |
| Hypertension       | 34.1        | 35.5   | 35.4   | 35.6   | 34.9   | 33.6   | 33.1   | 33.8   | 33.7   | 33.6   | 33.2   | 33.3   |
| Diabetes           | 8.9         | 9.3    | 10.0   | 10.3   | 10.2   | 9.9    | 9.5    | 10.9   | 10.2   | 12.0   | 10.4   | 10.6   |
| Smoking            | 13.0        | 12.3   | 11.9   | 11.2   | 11.0   | 10.0   | 8.8    | 8.7    | 8.1    | 7.9    | 7.6    | 7.4    |
| Obesity            | 14.7        | 15.5   | 15.9   | 16.8   | 17.7   | 18.2   | 18.1   | 18.8   | 19.0   | 19.1   | 19.1   | 20.0   |

+ Age-standardized prevalence;

**Table 2:** Absolute (SII) and relative (CIX) education inequality in hypertension, diabetes, smoking and obesity\* for the total population.

| Risk factor  | SII<br>(95% CI)         |                         | CIX<br>(95% CI)         |                         |
|--------------|-------------------------|-------------------------|-------------------------|-------------------------|
|              | 2007                    | 2018                    | 2007                    | 2018                    |
| Hypertension | -36.4<br>(-38.0; -34.8) | -35.7<br>(-38.6; -32.9) | -15.3<br>(-16.3; -14.3) | -14.8<br>(-16.3; -13.3) |
| Diabetes     | -13.1<br>(-13.5; -12.6) | -16.7<br>(-17.4; -16.1) | -19.7<br>(-21.2; -18.2) | -21.6<br>(-24.3; -18.8) |
| Smoking      | -4.4<br>(-6.6; -2.2)    | -6.7<br>(-8.3; -5.0)    | -5.7<br>(-7.7; -3.6)    | -12.2<br>(-14.2; -10.2) |
| Obesity      | -11.2<br>(-12.4; -9.9)  | -12.3<br>(-13.3; -11.4) | -11.2<br>(-12.5; -9.8)  | -8.6<br>(-9.3; -7.9)    |

VIGITEL, 2007 and 2018.

\*Age-standardized prevalence; SII: Slope index of inequality; CIX: Concentration index of inequality.

1  
2  
3  
4  
5  
6  
7  
8  
9  
10  
11  
12  
13  
14  
15  
16  
17  
18  
19  
20  
21  
22  
23  
24  
25  
26  
27  
28  
29  
30  
31  
32  
33  
34  
35  
36  
37  
38  
39  
40  
41  
42  
43  
44  
45  
46

### Hypertension

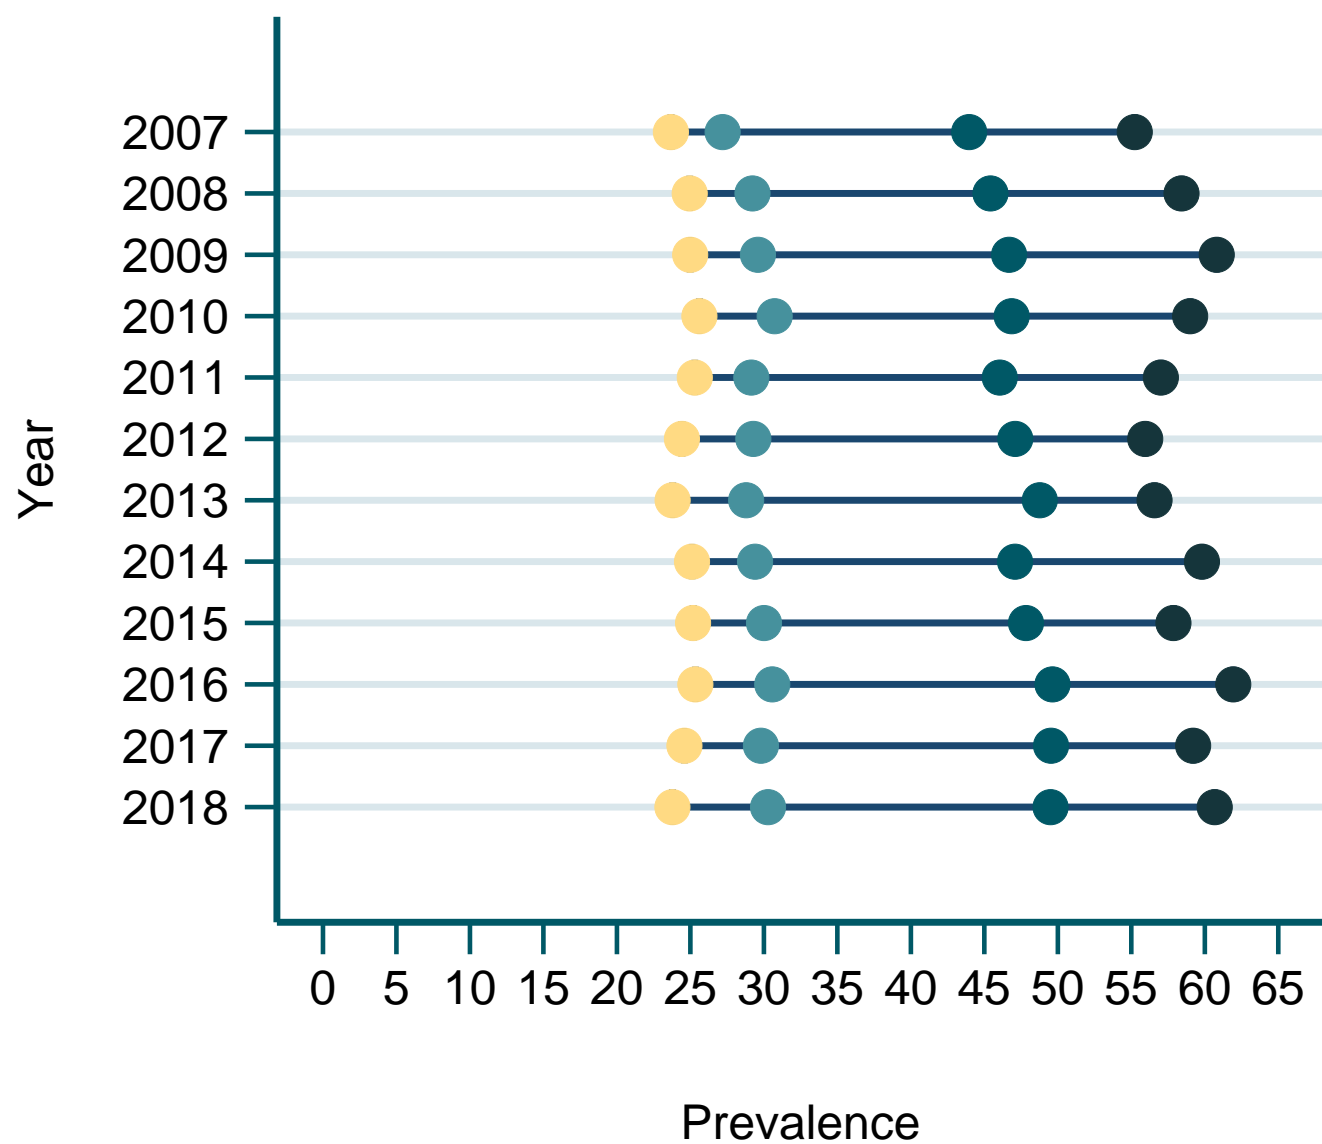

### Diabetes

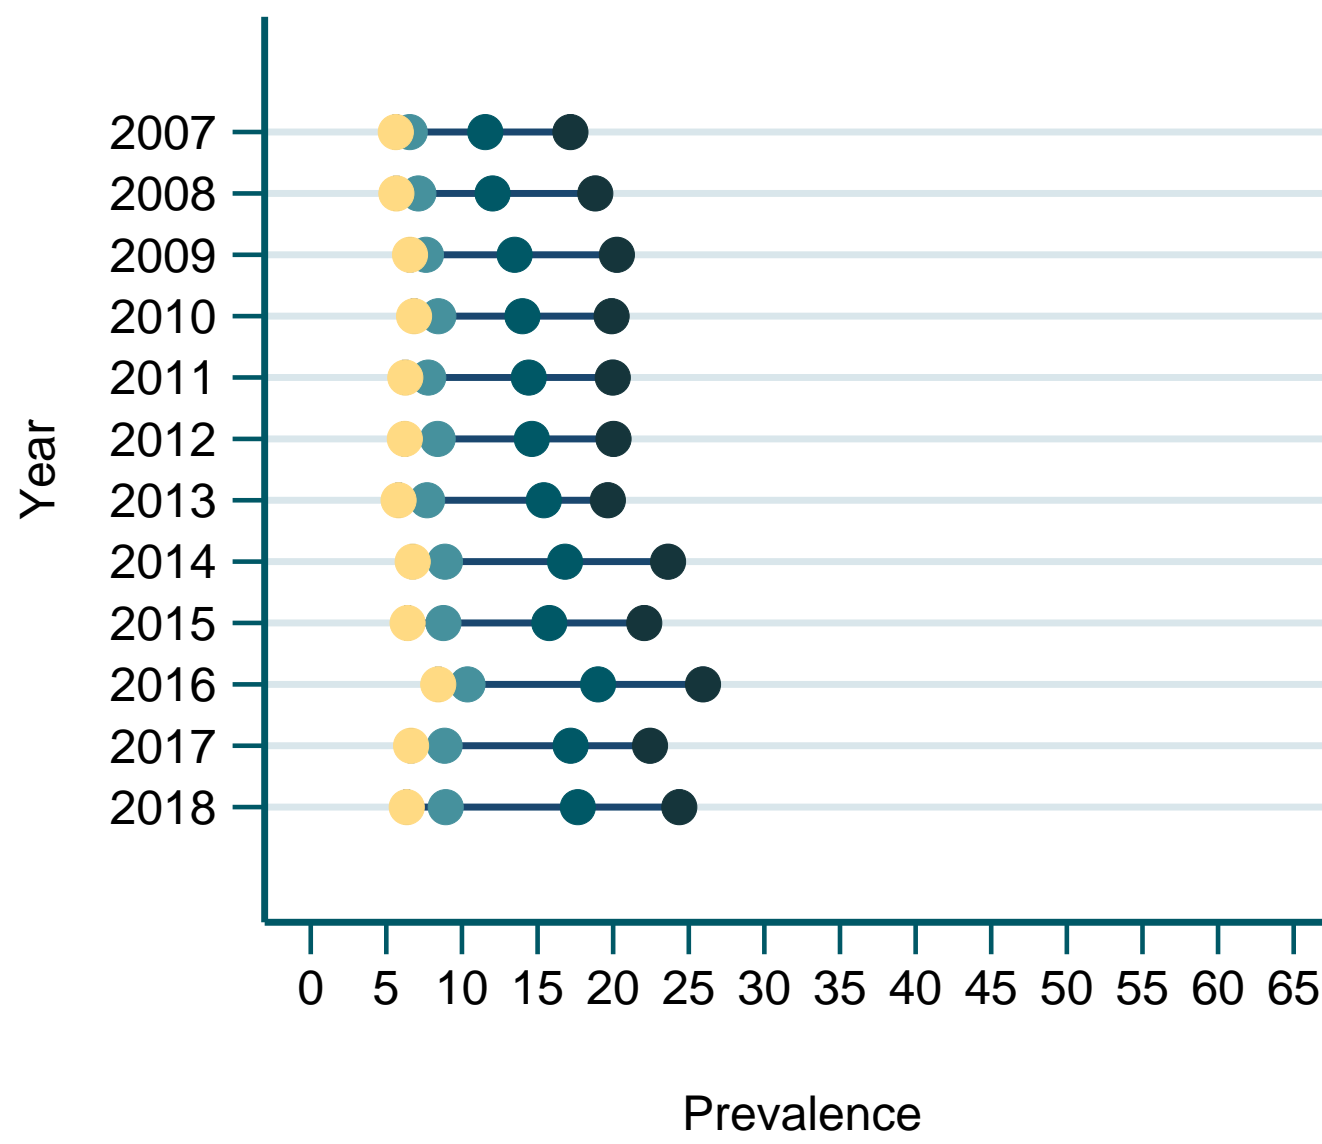

### Smoking

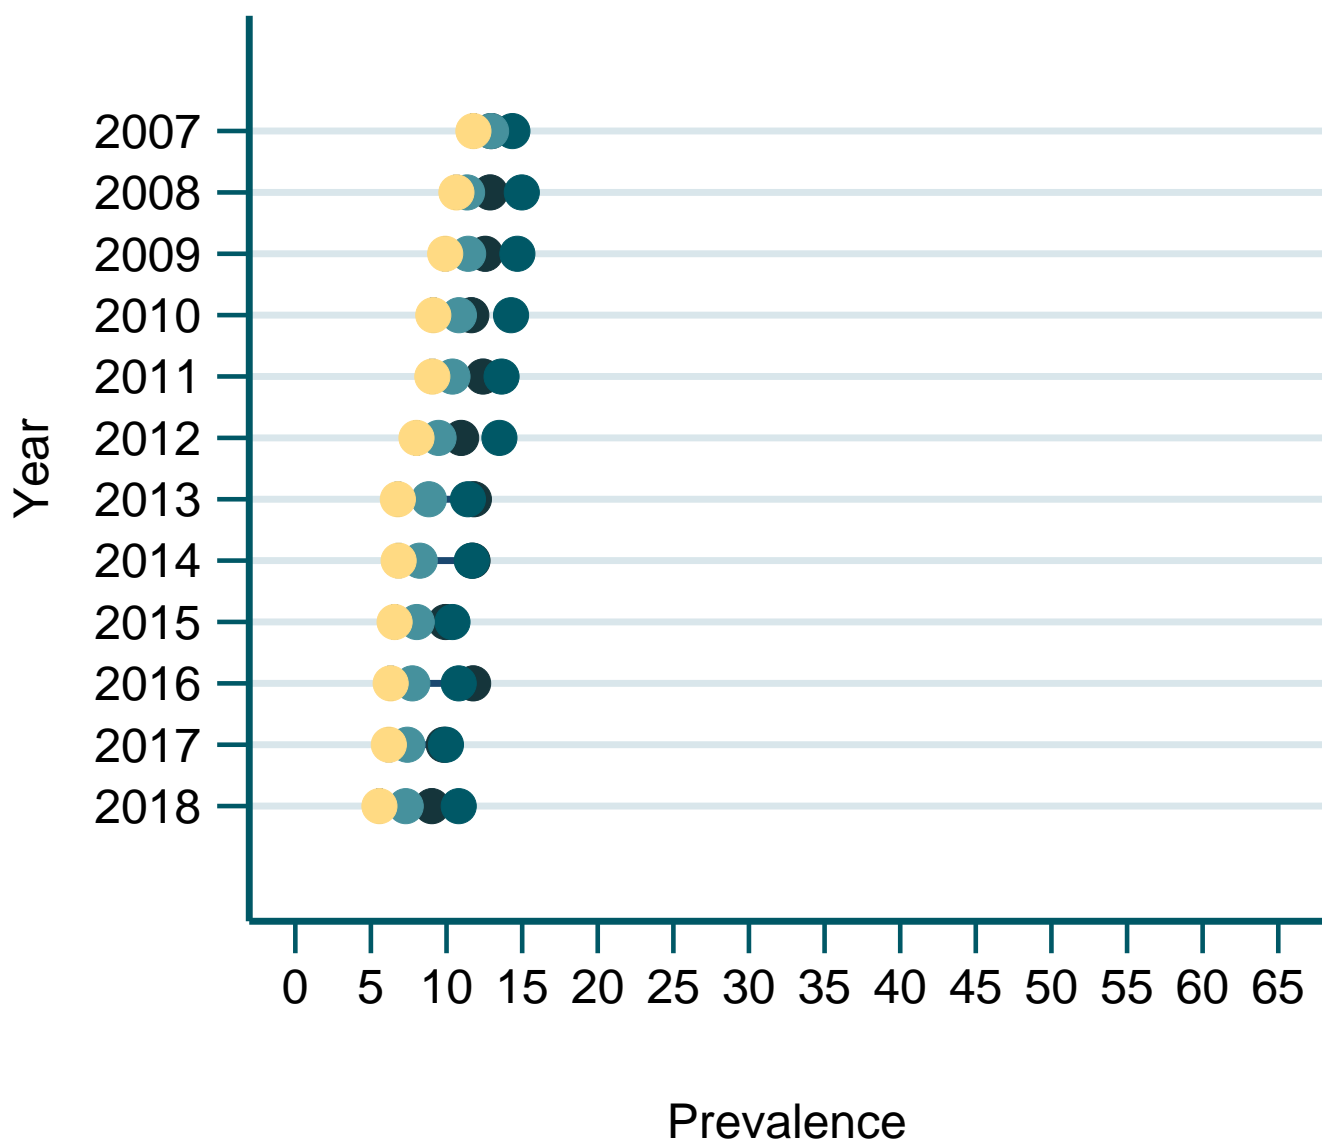

### Obesity

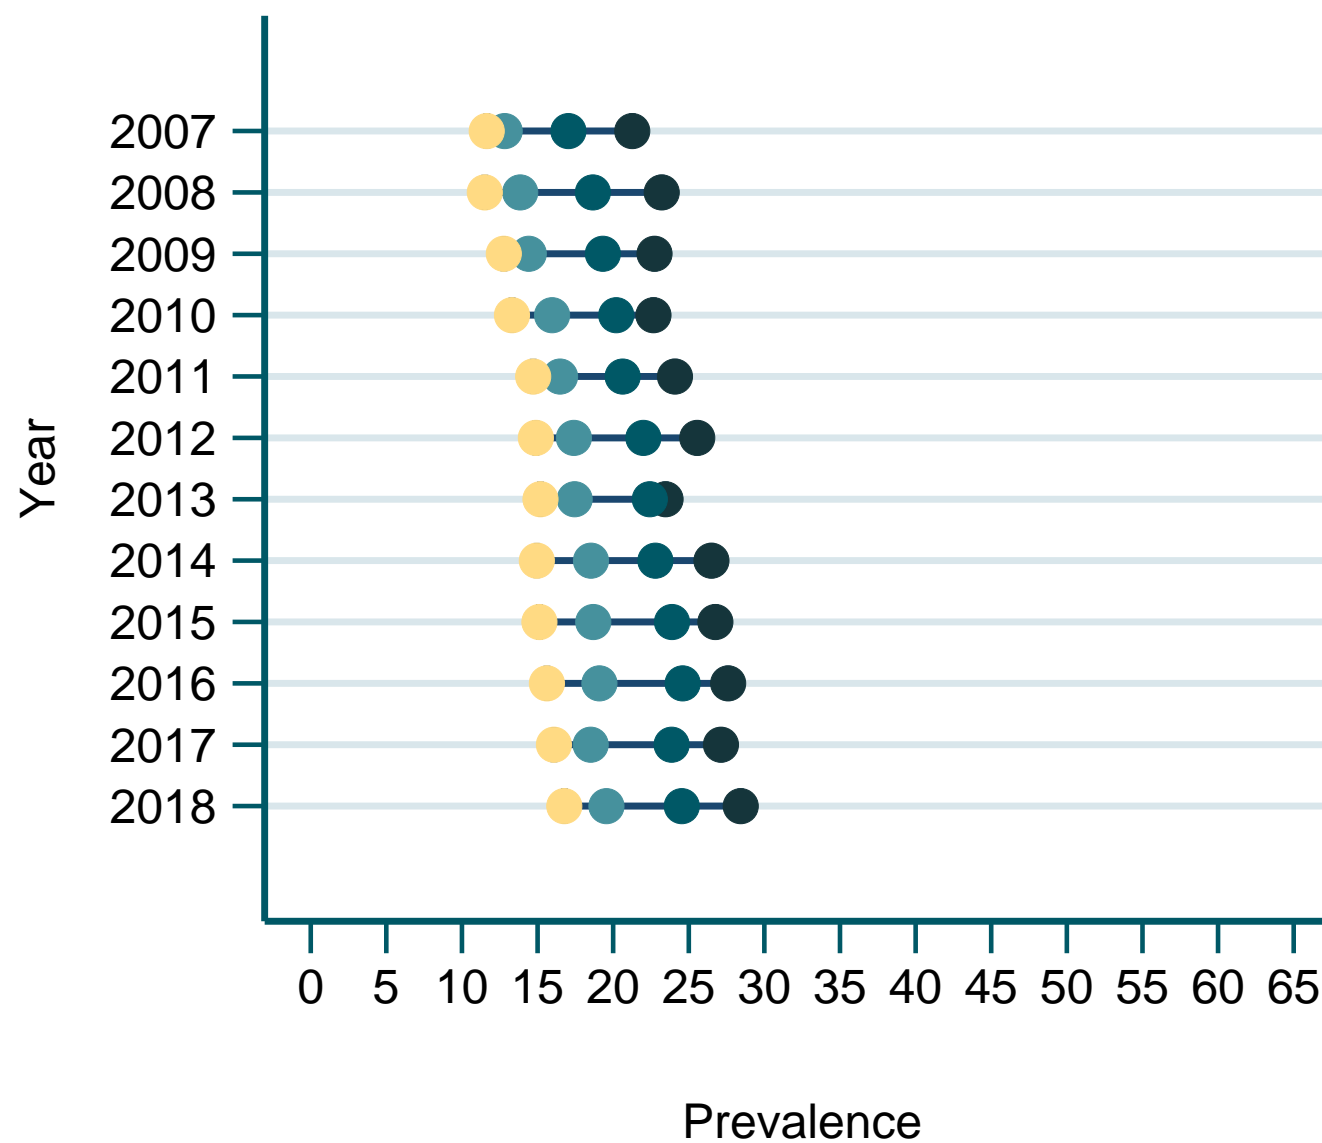

Years of education

- 0 to 3
- 4 to 8
- 9 to 11
- >=12



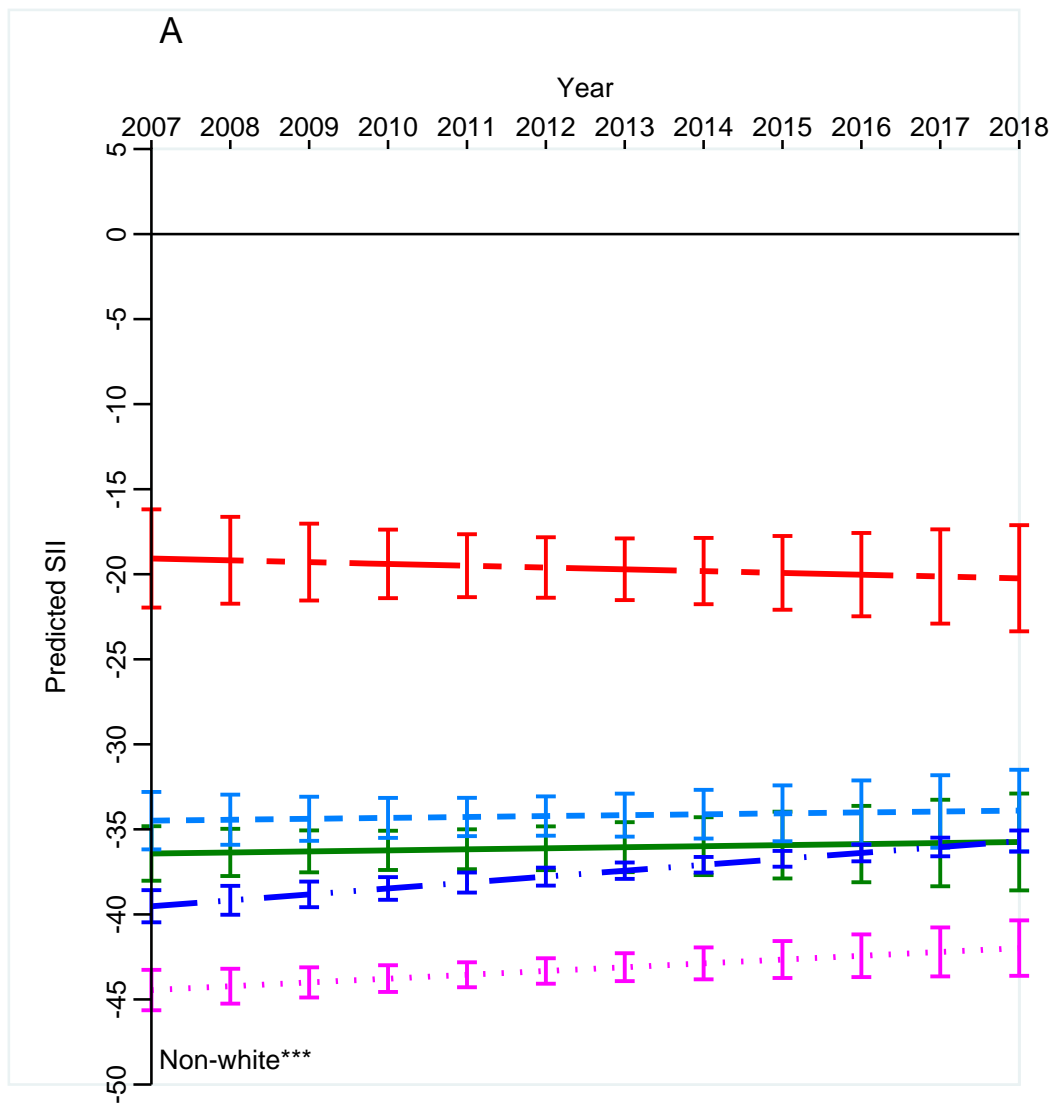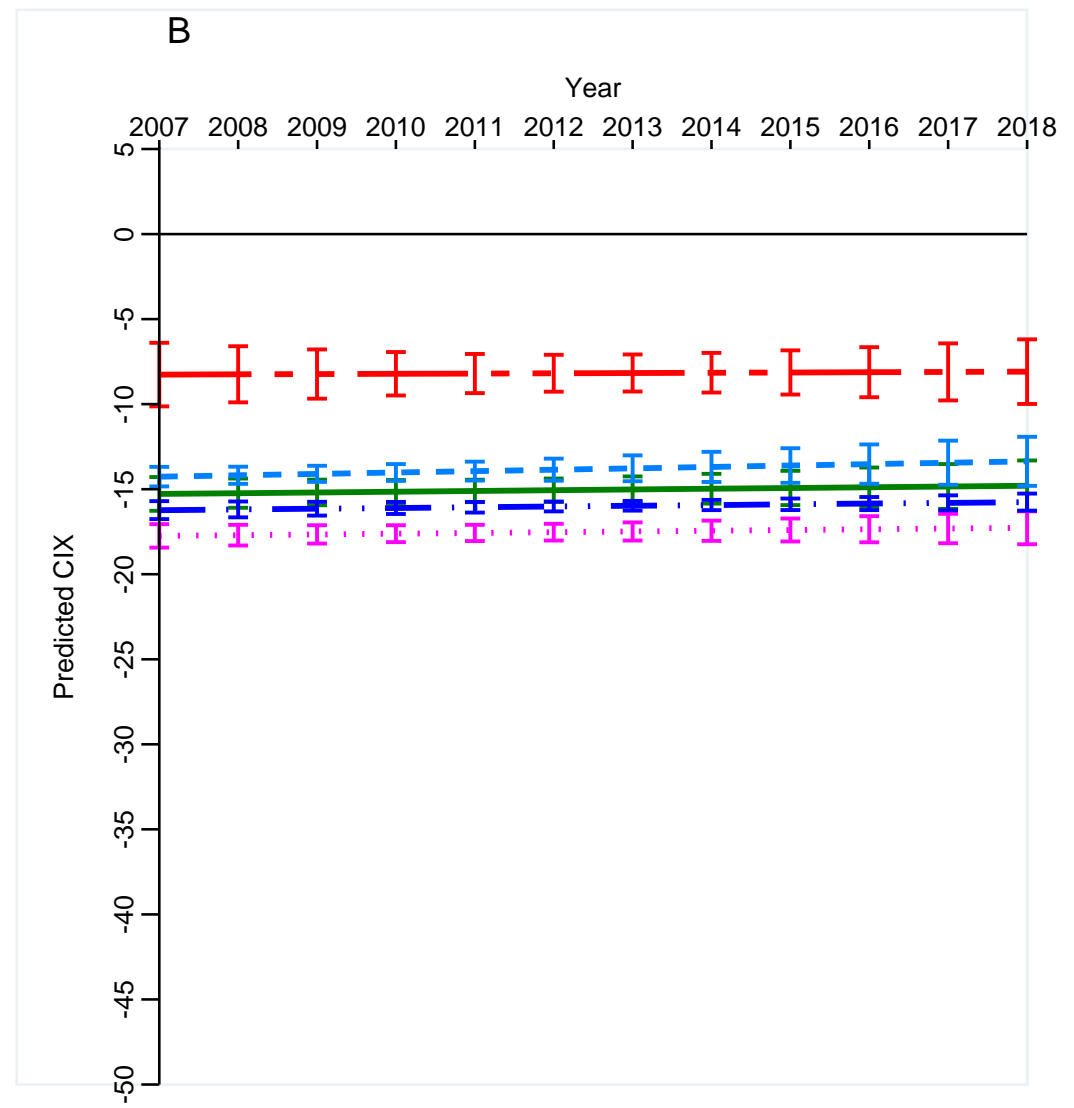

# Diabetes

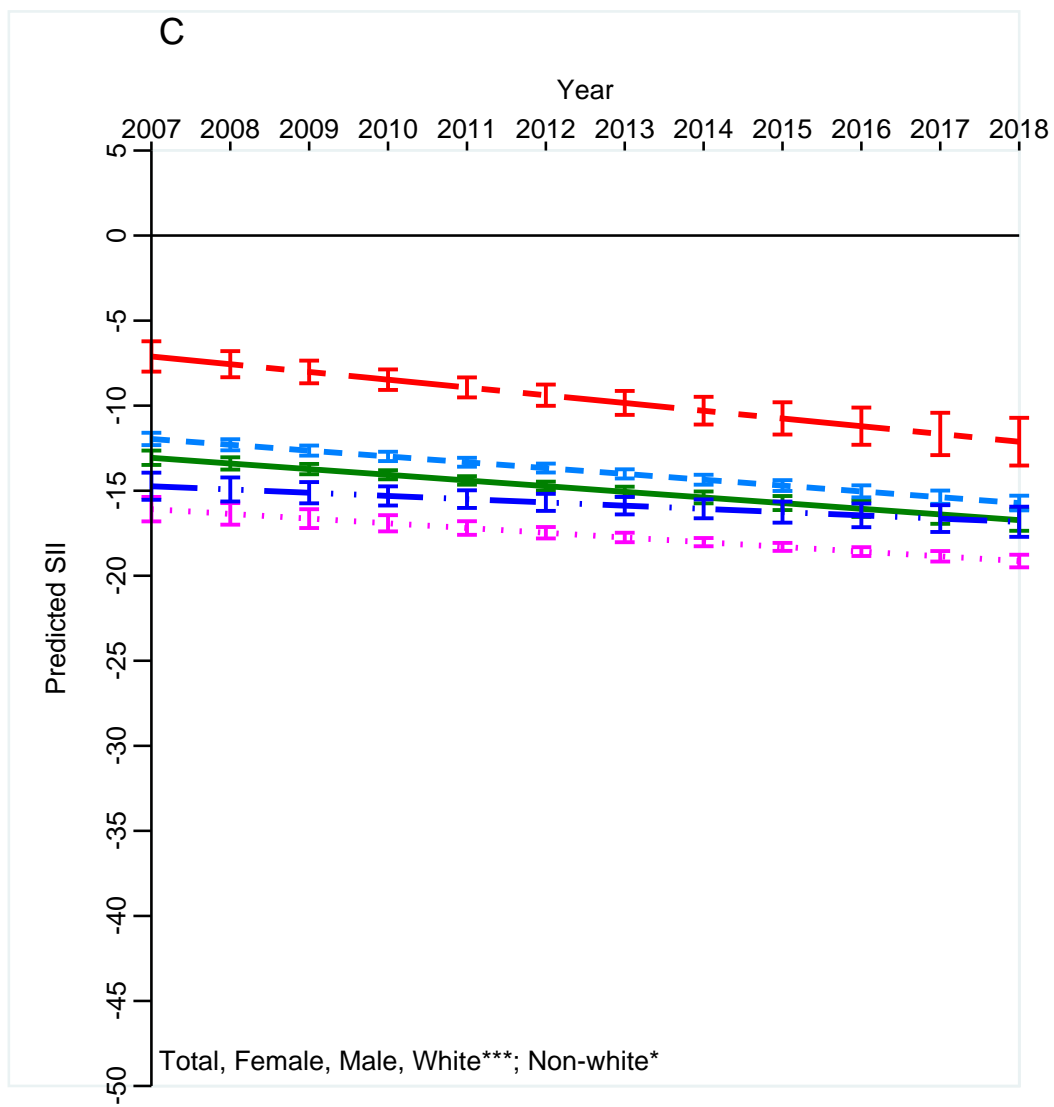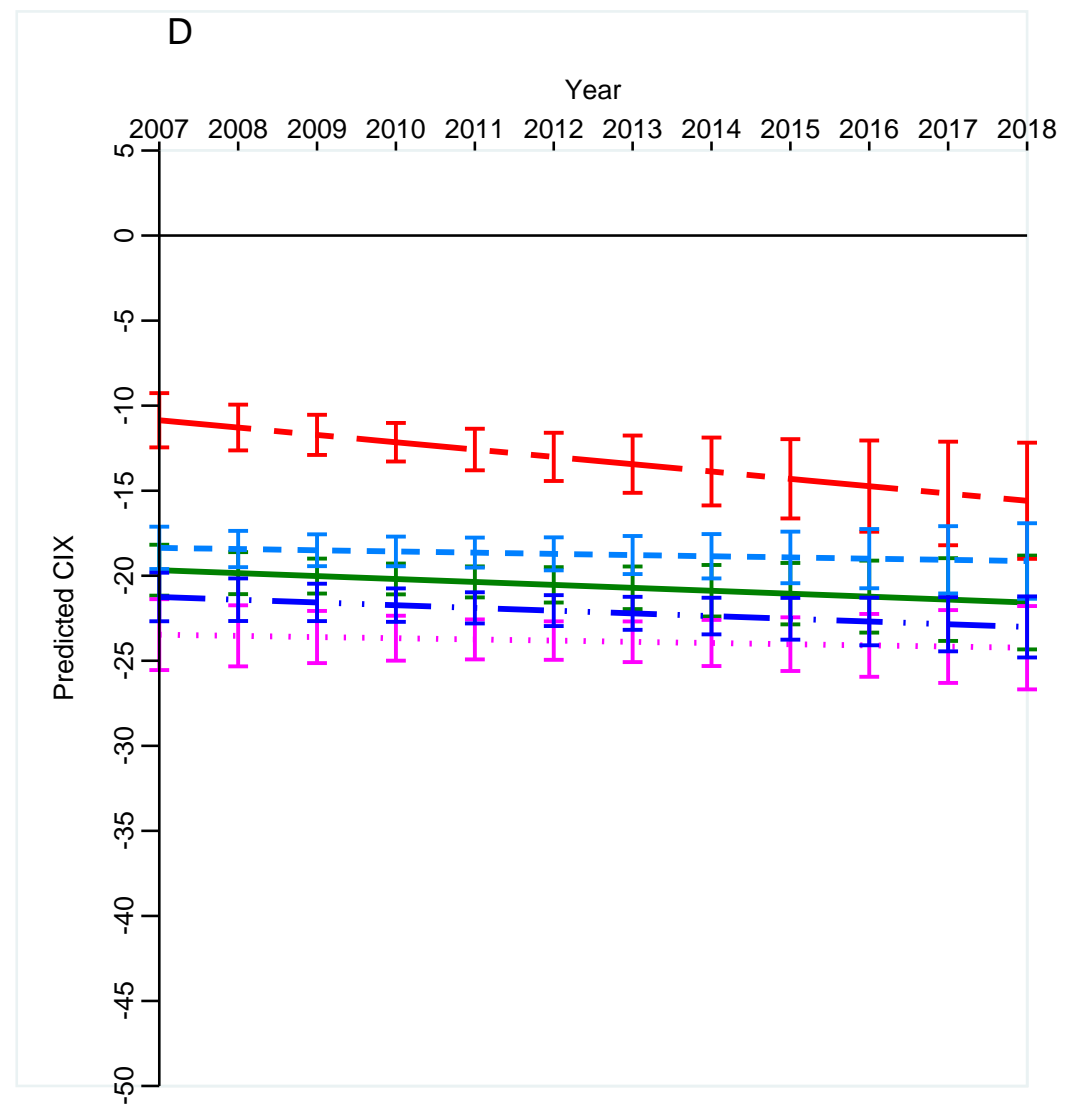

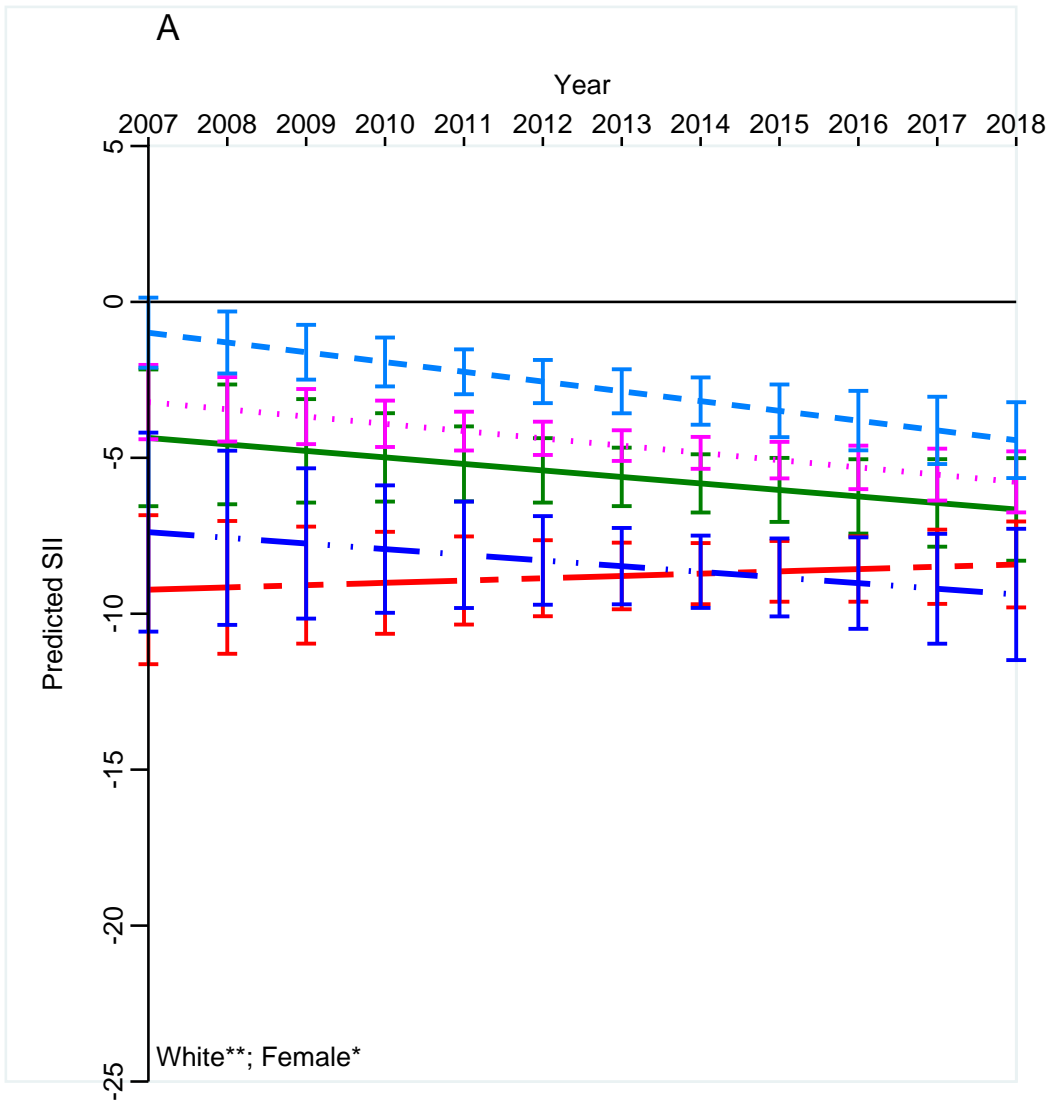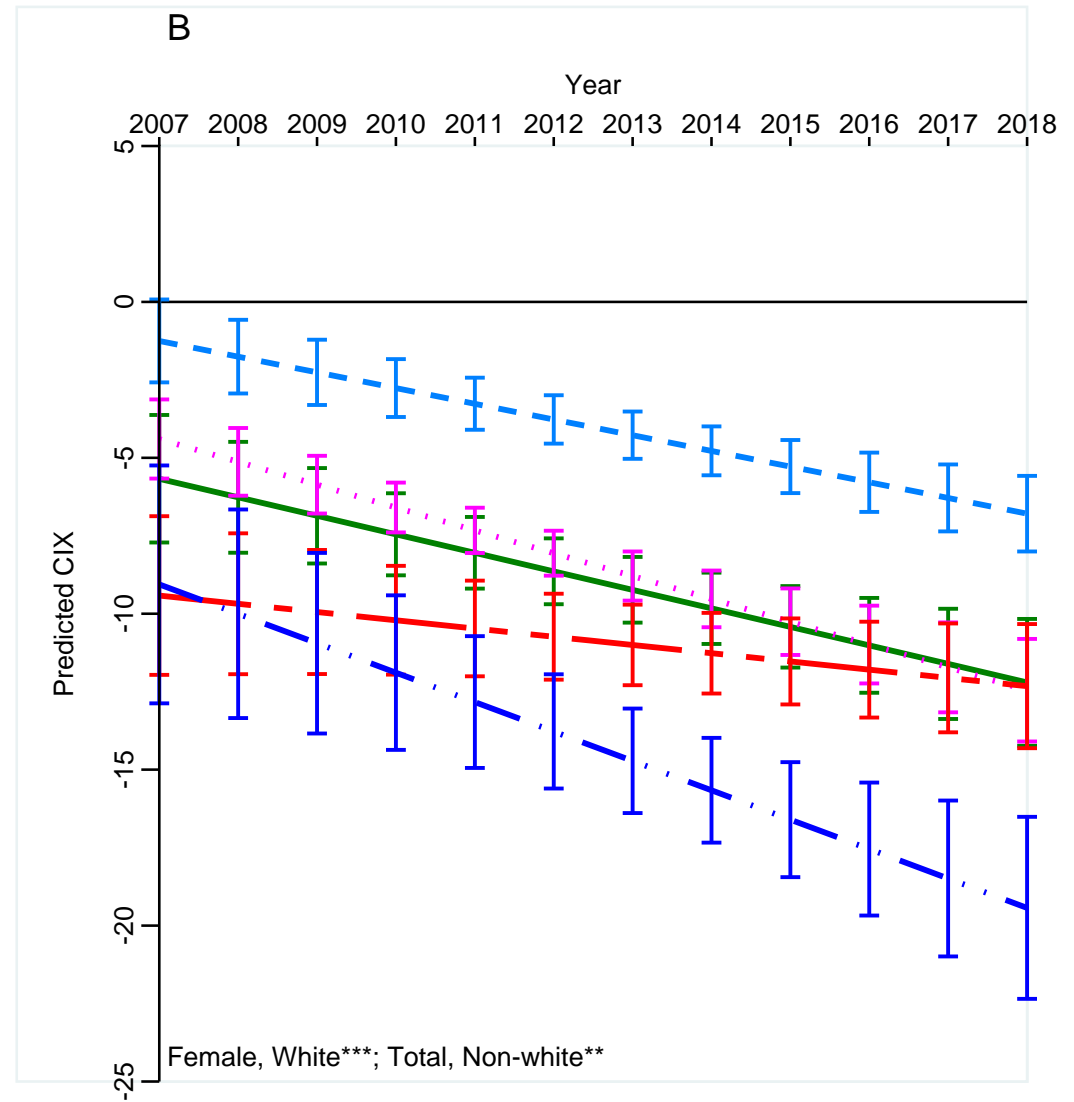

Obesity

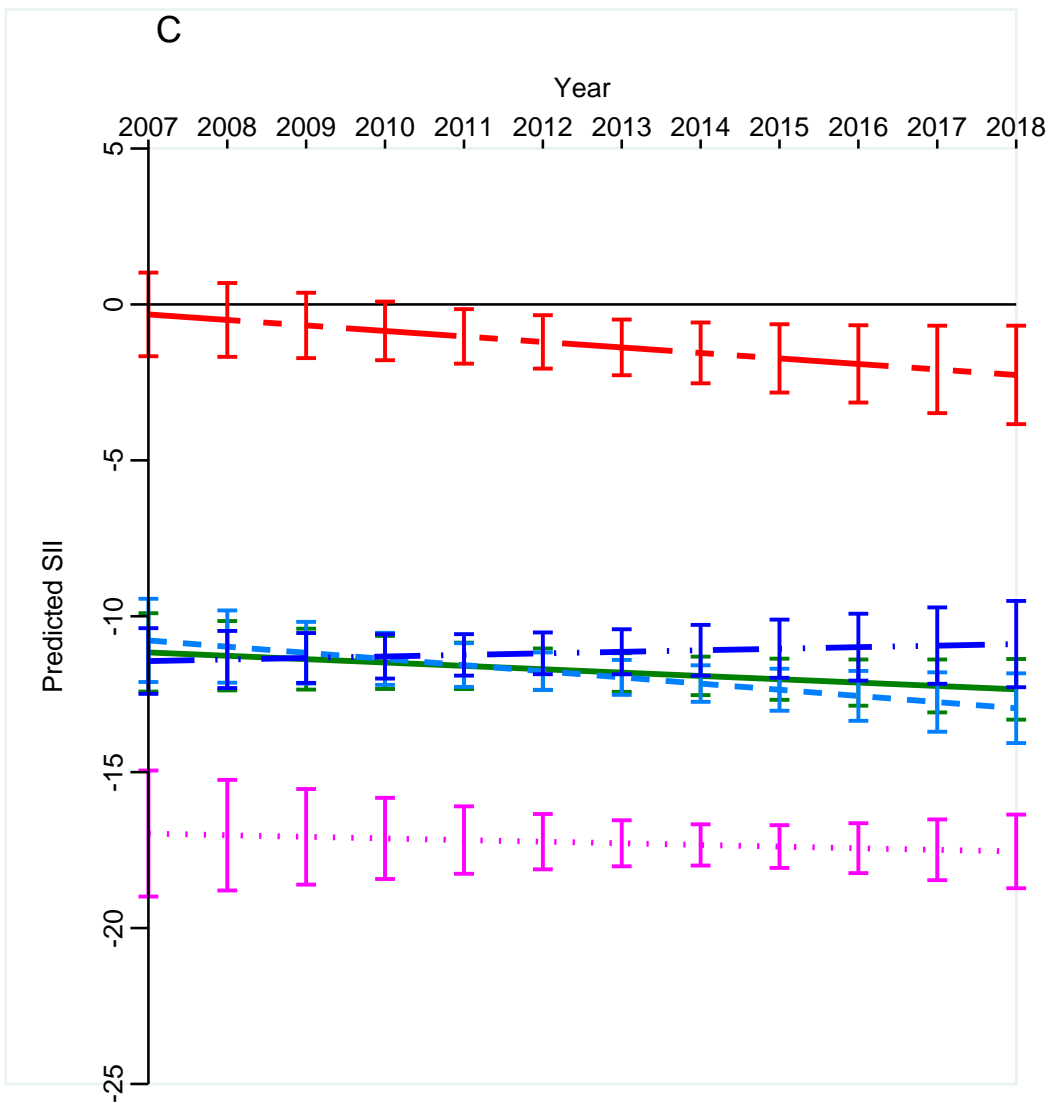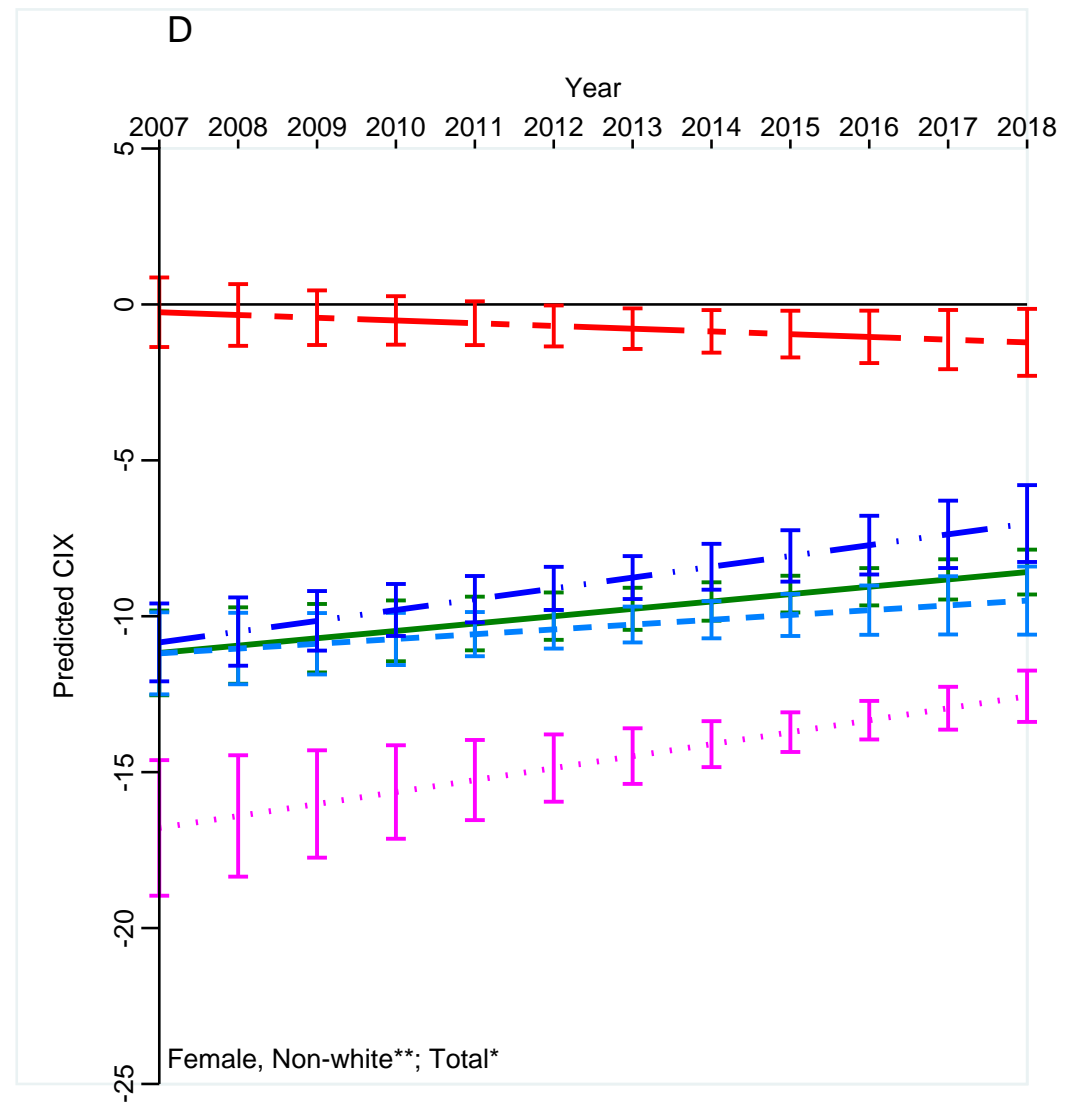

**Supplementary table 1: Age-standardized prevalence of hypertension by years of education, sex and skin color, VIGITEL 2007-2018.**

| Years of education | Hypertension % (95% CI) |                      |                      |                      |                      |                      |                      |                      |                      |                      |                      |                      |                      |
|--------------------|-------------------------|----------------------|----------------------|----------------------|----------------------|----------------------|----------------------|----------------------|----------------------|----------------------|----------------------|----------------------|----------------------|
|                    | Sex and skin color (%)  | 2007                 | 2008                 | 2009                 | 2010                 | 2011                 | 2012                 | 2013                 | 2014                 | 2015                 | 2016                 | 2017                 | 2018                 |
| 0-3 years          |                         |                      |                      |                      |                      |                      |                      |                      |                      |                      |                      |                      |                      |
| Total              |                         | 55.2 (53.3; 57.2)    | 58.4 (56.5; 60.3)    | 60.8 (58.8; 62.8)    | 59.0 (57.0; 61.0)    | 57.0 (55.1; 58.9)    | 56.0 (53.5; 58.4)    | 56.6 (54.3; 58.9)    | 59.8 (57.3; 62.4)    | 57.9 (55.9; 59.9)    | 61.9 (59.7; 64.1)    | 59.2 (57.2; 61.2)    | 60.7 (58.8; 62.6)    |
| Female             |                         | 58.9 (-115.4; 115.4) | 62.4 (-122.2; 122.2) | 64.6 (-126.6; 126.6) | 63.0 (-123.5; 123.5) | 62.1 (-121.8; 121.8) | 60.0 (-117.6; 117.6) | 62.2 (-121.9; 121.9) | 62.5 (-122.6; 122.6) | 62.5 (-122.5; 122.5) | 66.7 (-130.8; 130.8) | 62.6 (-122.8; 122.8) | 63.6 (-124.7; 124.7) |
| Male               |                         | 46.2 (-89.3; 91.7)   | 48.3 (-93.6; 95.9)   | 50.7 (-98.2; 100.6)  | 48.8 (-94.5; 96.9)   | 43.3 (-83.8; 86.1)   | 45.1 (-86.9; 89.9)   | 43.3 (-83.4; 86.2)   | 52.6 (-101.6; 104.7) | 45.3 (-87.6; 90.0)   | 50.4 (-97.4; 100.1)  | 50.5 (-97.8; 100.2)  | 52.9 (-102.6; 104.9) |
| White              |                         | 54.6 (-105.3; 108.7) | 57.6 (-111.2; 114.7) | 59.0 (-113.9; 117.5) | 61.5 (-118.7; 122.3) | 58.9 (-113.7; 117.1) | 55.8 (-107.1; 111.5) | 56.9 (-109.6; 113.6) | 56.6 (-108.6; 113.2) | 57.2 (-110.3; 113.9) | 61.5 (-118.6; 122.5) | 58.6 (-113.2; 116.7) | 61.6 (-118.9; 122.4) |
| Non-white          |                         | 55.5 (-107.0; 110.7) | 58.8 (-113.3; 117.0) | 61.5 (-118.5; 122.5) | 57.9 (-111.6; 115.4) | 55.9 (-108.1; 111.3) | 56.1 (-108.0; 111.9) | 56.3 (-108.6; 112.1) | 62.5 (-120.4; 124.4) | 58.2 (-112.3; 115.9) | 62.3 (-120.4; 123.8) | 60.5 (-117.0; 120.4) | 58.5 (-113.0; 116.2) |
| 4-8 years          |                         |                      |                      |                      |                      |                      |                      |                      |                      |                      |                      |                      |                      |
| Total***           |                         | 44.0 (42.8; 45.2)    | 45.4 (44.2; 46.6)    | 46.7 (45.5; 47.9)    | 46.9 (45.7; 48.0)    | 46.1 (44.9; 47.2)    | 47.1 (45.8; 48.4)    | 48.8 (47.6; 50.0)    | 47.1 (45.8; 48.4)    | 47.8 (46.7; 48.9)    | 49.6 (48.4; 50.9)    | 49.5 (48.4; 50.7)    | 49.5 (48.4; 50.6)    |
| Female***          |                         | 48.3 (-94.7; 94.7)   | 50.6 (-99.3; 99.3)   | 50.4 (-98.8; 98.8)   | 50.9 (-99.8; 99.8)   | 51.0 (-100.0; 100.0) | 52.1 (-102.2; 102.2) | 53.4 (-104.7; 104.7) | 51.3 (-100.5; 100.5) | 52.7 (-103.4; 103.4) | 54.1 (-106.1; 106.1) | 53.6 (-105.0; 105.0) | 53.5 (-104.9; 104.9) |
| Male***            |                         | 35.3 (-68.3; 69.9)   | 34.6 (-66.9; 68.5)   | 38.8 (-75.3; 76.9)   | 38.2 (-74.1; 75.7)   | 36.2 (-70.2; 71.7)   | 36.7 (-71.0; 72.7)   | 38.5 (-74.7; 76.2)   | 37.9 (-73.3; 75.0)   | 37.7 (-73.2; 74.6)   | 40.5 (-78.5; 80.1)   | 40.9 (-79.5; 80.9)   | 40.6 (-78.9; 80.4)   |
| White***           |                         | 45.7 (-88.6; 90.5)   | 48.2 (-93.5; 95.4)   | 47.2 (-91.5; 93.5)   | 48.5 (-94.1; 96.0)   | 47.8 (-92.8; 94.6)   | 48.9 (-94.9; 97.0)   | 51.8 (-100.5; 102.4) | 48.0 (-92.9; 95.1)   | 48.9 (-94.9; 96.7)   | 50.7 (-98.3; 100.3)  | 51.4 (-99.8; 101.7)  | 50.1 (-97.2; 99.1)   |
| Non-white**        |                         | 43.0 (-83.1; 85.3)   | 43.9 (-84.9; 87.1)   | 46.4 (-89.9; 92.1)   | 45.9 (-89.0; 91.1)   | 44.8 (-86.9; 88.8)   | 45.6 (-88.3; 90.4)   | 46.1 (-89.5; 91.3)   | 46.4 (-89.9; 92.0)   | 47.2 (-91.6; 93.5)   | 48.7 (-94.6; 96.4)   | 47.4 (-92.0; 93.9)   | 47.5 (-92.1; 94.0)   |
| 9-11 years         |                         |                      |                      |                      |                      |                      |                      |                      |                      |                      |                      |                      |                      |
| Total              |                         | 27.2 (26.3; 28.1)    | 29.2 (28.3; 30.1)    | 29.6 (28.7; 30.5)    | 30.7 (29.9; 31.6)    | 29.2 (28.3; 30.0)    | 29.3 (28.4; 30.2)    | 28.8 (28.0; 29.6)    | 29.4 (28.5; 30.3)    | 30.0 (29.3; 30.8)    | 30.6 (29.8; 31.4)    | 29.8 (29.0; 30.6)    | 30.3 (29.5; 31.1)    |
| Female*            |                         | 29.0 (-56.8; 56.8)   | 31.4 (-61.6; 61.6)   | 31.6 (-61.9; 61.9)   | 32.7 (-64.1; 64.1)   | 31.0 (-60.8; 60.8)   | 31.5 (-61.7; 61.7)   | 31.0 (-60.7; 60.7)   | 31.3 (-61.4; 61.4)   | 32.9 (-64.6; 64.6)   | 32.6 (-63.9; 63.9)   | 32.0 (-62.8; 62.8)   | 33.1 (-64.8; 64.8)   |
| Male               |                         | 24.1 (-46.7; 47.9)   | 25.5 (-49.3; 50.6)   | 26.2 (-50.7; 51.9)   | 27.1 (-52.6; 53.7)   | 26.1 (-50.7; 51.8)   | 25.5 (-49.3; 50.5)   | 25.2 (-48.9; 50.0)   | 26.2 (-50.8; 52.0)   | 25.2 (-48.8; 49.8)   | 27.2 (-52.9; 53.9)   | 26.0 (-50.5; 51.5)   | 25.5 (-49.4; 50.5)   |
| White              |                         | 27.9 (-54.0; 55.3)   | 31.4 (-60.9; 62.2)   | 31.3 (-60.6; 61.9)   | 33.1 (-64.2; 65.5)   | 32.4 (-62.9; 64.1)   | 33.3 (-64.5; 65.8)   | 31.1 (-60.3; 61.5)   | 31.8 (-61.7; 63.1)   | 31.4 (-61.1; 62.2)   | 33.4 (-65.0; 66.2)   | 32.0 (-62.1; 63.3)   | 31.9 (-61.9; 63.0)   |
| Non-white          |                         | 26.7 (-51.6; 53.1)   | 27.8 (-53.7; 55.3)   | 28.5 (-55.1; 56.7)   | 29.3 (-56.6; 58.1)   | 26.8 (-51.9; 53.3)   | 26.3 (-50.8; 52.3)   | 27.1 (-52.4; 53.7)   | 27.7 (-53.5; 55.0)   | 29.2 (-56.5; 57.8)   | 28.6 (-55.3; 56.7)   | 27.4 (-53.0; 54.3)   | 27.6 (-53.5; 54.8)   |
| 12 or more years   |                         |                      |                      |                      |                      |                      |                      |                      |                      |                      |                      |                      |                      |
| Total              |                         | 23.7 (22.7; 24.6)    | 25.0 (24.0; 25.9)    | 25.0 (24.1; 25.9)    | 25.6 (24.7; 26.5)    | 25.3 (24.4; 26.2)    | 24.4 (23.5; 25.3)    | 23.8 (23.0; 24.6)    | 25.1 (24.2; 26.0)    | 25.2 (24.5; 25.9)    | 25.3 (24.6; 26.0)    | 24.6 (23.9; 25.3)    | 23.8 (23.1; 24.4)    |
| Female             |                         | 22.4 (-43.8; 43.8)   | 23.9 (-46.9; 46.9)   | 24.3 (-47.7; 47.7)   | 25.4 (-49.8; 49.8)   | 24.3 (-47.7; 47.7)   | 23.9 (-46.7; 46.7)   | 23.0 (-45.0; 45.0)   | 25.0 (-49.1; 49.1)   | 25.2 (-49.3; 49.3)   | 24.7 (-48.5; 48.5)   | 24.0 (-47.1; 47.1)   | 23.6 (-46.3; 46.3)   |
| Male               |                         | 25.7 (-49.8; 51.0)   | 26.6 (-51.5; 52.8)   | 26.0 (-50.4; 51.6)   | 26.0 (-50.3; 51.5)   | 26.9 (-52.1; 53.3)   | 25.4 (-49.2; 50.4)   | 25.2 (-48.9; 49.9)   | 25.3 (-48.9; 50.1)   | 25.2 (-49.0; 49.9)   | 26.3 (-51.2; 52.1)   | 25.6 (-49.7; 50.5)   | 24.0 (-46.6; 47.5)   |
| White              |                         | 24.7 (-47.7; 49.2)   | 25.2 (-48.6; 50.0)   | 24.7 (-47.8; 49.2)   | 26.7 (-51.7; 53.1)   | 26.4 (-51.1; 52.4)   | 25.4 (-49.0; 50.4)   | 25.9 (-50.2; 51.4)   | 26.7 (-51.5; 53.0)   | 26.8 (-52.0; 53.2)   | 27.1 (-52.5; 53.6)   | 26.0 (-50.5; 51.6)   | 25.0 (-48.4; 49.4)   |
| Non-white          |                         | 22.3 (-43.0; 44.4)   | 24.7 (-47.8; 49.1)   | 25.3 (-48.9; 50.2)   | 24.2 (-46.9; 48.1)   | 23.8 (-46.0; 47.3)   | 23.2 (-44.8; 46.1)   | 21.1 (-40.7; 41.9)   | 23.3 (-45.0; 46.3)   | 23.2 (-45.0; 46.0)   | 23.2 (-45.0; 46.0)   | 22.0 (-42.7; 43.7)   | 21.7 (-42.0; 43.0)   |

\*p&lt;0.05; \*\*p&lt;0.01; \*\*\*p&lt;0.001.

**Supplementary table 2: Age-standardized prevalence of diabetes by years of education, sex and skin color, VIGITEL 2007-2018.**

| Years of education     | Diabetes % (95% CI) |                    |                    |                    |                    |                    |                    |                    |                    |                    |                    |                    |
|------------------------|---------------------|--------------------|--------------------|--------------------|--------------------|--------------------|--------------------|--------------------|--------------------|--------------------|--------------------|--------------------|
| Sex and skin color (%) | 2007                | 2008               | 2009               | 2010               | 2011               | 2012               | 2013               | 2014               | 2015               | 2016               | 2017               | 2018               |
| 0-3 years              |                     |                    |                    |                    |                    |                    |                    |                    |                    |                    |                    |                    |
| Total***               | 17.2 (15.6; 18.7)   | 18.8 (17.2; 20.4)  | 20.3 (18.5; 22.0)  | 19.9 (18.2; 21.6)  | 20.0 (18.4; 21.6)  | 20.0 (18.0; 22.0)  | 19.7 (17.8; 21.5)  | 23.6 (21.4; 25.9)  | 22.1 (20.3; 23.8)  | 25.9 (23.9; 28.0)  | 22.4 (20.8; 24.1)  | 24.4 (22.7; 26.0)  |
| Female***              | 18.2 (-35.7; 35.7)  | 20.1 (-39.4; 39.4) | 21.4 (-42.0; 42.0) | 20.8 (-40.7; 40.7) | 21.7 (-42.6; 42.6) | 21.8 (-42.8; 42.8) | 21.7 (-42.6; 42.6) | 25.6 (-50.1; 50.1) | 23.7 (-46.5; 46.5) | 28.1 (-55.1; 55.1) | 24.0 (-47.0; 47.0) | 25.8 (-50.6; 50.6) |
| Male**                 | 14.6 (-27.6; 29.6)  | 15.6 (-29.5; 31.5) | 17.2 (-32.5; 34.8) | 17.7 (-33.5; 35.7) | 15.3 (-28.9; 30.9) | 15.2 (-28.6; 31.1) | 14.8 (-27.7; 30.2) | 18.6 (-34.9; 37.8) | 17.5 (-33.2; 35.4) | 20.7 (-39.3; 41.9) | 18.5 (-35.2; 37.3) | 20.6 (-39.4; 41.5) |
| White*                 | 15.7 (-29.6; 32.0)  | 18.3 (-34.6; 37.0) | 20.2 (-38.1; 41.0) | 20.3 (-38.3; 41.1) | 18.1 (-34.1; 36.6) | 18.0 (-33.6; 36.9) | 19.4 (-36.6; 39.4) | 23.2 (-43.8; 47.3) | 22.5 (-42.8; 45.6) | 25.2 (-47.8; 50.9) | 21.7 (-41.1; 43.9) | 21.5 (-40.8; 43.6) |
| Non-white***           | 17.8 (-33.6; 36.3)  | 19.1 (-35.9; 38.8) | 20.3 (-38.0; 41.5) | 19.7 (-37.0; 40.4) | 21.1 (-40.1; 42.6) | 21.5 (-40.7; 43.7) | 19.9 (-37.5; 40.4) | 24.0 (-45.3; 48.7) | 21.8 (-41.2; 44.3) | 26.6 (-50.7; 53.7) | 22.4 (-42.5; 45.4) | 24.2 (-46.0; 48.7) |
| 4-8 years              |                     |                    |                    |                    |                    |                    |                    |                    |                    |                    |                    |                    |
| Total***               | 11.5 (10.7; 12.4)   | 12.0 (11.2; 12.9)  | 13.5 (12.6; 14.4)  | 14.0 (13.1; 14.9)  | 14.4 (13.5; 15.3)  | 14.6 (13.7; 15.6)  | 15.4 (14.5; 16.3)  | 16.8 (15.8; 17.9)  | 15.8 (15.0; 16.6)  | 19.0 (18.0; 20.0)  | 17.2 (16.3; 18.0)  | 17.7 (16.8; 18.5)  |
| Female***              | 12.4 (-24.3; 24.3)  | 13.1 (-25.7; 25.7) | 13.8 (-27.1; 27.1) | 14.7 (-28.8; 28.8) | 15.8 (-31.0; 31.0) | 15.0 (-29.4; 29.4) | 16.0 (-31.4; 31.4) | 17.3 (-34.0; 34.0) | 16.6 (-32.6; 32.6) | 20.2 (-39.5; 39.5) | 17.7 (-34.7; 34.7) | 18.0 (-35.4; 35.4) |
| Male***                | 9.8 (-18.7; 19.9)   | 9.8 (-18.6; 19.8)  | 12.7 (-24.4; 25.6) | 12.5 (-24.0; 25.2) | 11.7 (-22.3; 23.5) | 13.8 (-26.5; 27.7) | 14.1 (-27.1; 28.3) | 15.7 (-30.2; 31.5) | 14.0 (-26.9; 28.0) | 16.7 (-32.0; 33.3) | 16.1 (-31.0; 32.1) | 16.8 (-32.4; 33.5) |
| White***               | 12.3 (-23.4; 24.7)  | 12.7 (-24.4; 25.6) | 13.9 (-26.4; 27.9) | 15.5 (-29.8; 31.2) | 15.3 (-29.4; 30.7) | 14.1 (-26.9; 28.5) | 16.5 (-31.5; 33.0) | 17.0 (-32.4; 34.1) | 15.8 (-30.4; 31.7) | 20.6 (-39.5; 41.0) | 17.6 (-33.9; 35.3) | 18.3 (-35.1; 36.5) |
| Non-white***           | 11.1 (-21.1; 22.5)  | 11.6 (-22.0; 23.6) | 13.3 (-25.2; 26.9) | 13.1 (-24.9; 26.6) | 13.8 (-26.3; 27.7) | 15.0 (-28.7; 30.2) | 14.5 (-27.7; 29.1) | 16.7 (-31.9; 33.6) | 15.7 (-30.2; 31.5) | 17.6 (-33.8; 35.3) | 16.4 (-31.3; 32.8) | 16.1 (-30.8; 32.2) |
| 9-11 years             |                     |                    |                    |                    |                    |                    |                    |                    |                    |                    |                    |                    |
| Total***               | 6.5 (6.0; 7.1)      | 7.1 (6.6; 7.7)     | 7.6 (7.1; 8.2)     | 8.4 (7.9; 9.0)     | 7.8 (7.3; 8.3)     | 8.4 (7.8; 9.0)     | 7.7 (7.2; 8.2)     | 8.9 (8.3; 9.5)     | 8.8 (8.3; 9.3)     | 10.4 (9.8; 10.9)   | 8.9 (8.4; 9.3)     | 8.9 (8.5; 9.4)     |
| Female**               | 6.7 (-13.2; 13.2)   | 7.3 (-14.3; 14.3)  | 7.8 (-15.2; 15.2)  | 8.9 (-17.4; 17.4)  | 7.9 (-15.5; 15.5)  | 8.6 (-16.9; 16.9)  | 7.9 (-15.6; 15.6)  | 9.1 (-17.8; 17.8)  | 9.4 (-18.4; 18.4)  | 11.0 (-21.5; 21.5) | 8.9 (-17.4; 17.4)  | 9.1 (-17.9; 17.9)  |
| Male***                | 6.3 (-11.9; 12.6)   | 6.8 (-13.0; 13.8)  | 7.4 (-14.1; 14.8)  | 7.6 (-14.5; 15.3)  | 7.6 (-14.4; 15.2)  | 8.0 (-15.3; 16.0)  | 7.3 (-14.0; 14.7)  | 8.6 (-16.4; 17.2)  | 7.7 (-14.9; 15.5)  | 9.4 (-18.0; 18.7)  | 8.8 (-17.0; 17.6)  | 8.6 (-16.6; 17.2)  |
| White**                | 6.9 (-13.1; 13.9)   | 8.3 (-15.9; 16.7)  | 8.0 (-15.3; 16.2)  | 9.8 (-18.8; 19.6)  | 9.1 (-17.4; 18.2)  | 9.3 (-17.8; 18.6)  | 8.6 (-16.6; 17.3)  | 9.7 (-18.6; 19.5)  | 9.5 (-18.3; 19.0)  | 11.5 (-22.1; 22.9) | 9.8 (-18.9; 19.6)  | 9.5 (-18.3; 19.0)  |
| Non-white**            | 6.3 (-11.9; 12.8)   | 6.4 (-11.9; 13.0)  | 7.4 (-13.9; 14.9)  | 7.6 (-14.3; 15.4)  | 6.8 (-12.9; 13.9)  | 7.7 (-14.7; 15.6)  | 7.0 (-13.2; 14.1)  | 8.3 (-15.7; 16.7)  | 8.3 (-15.9; 16.7)  | 9.6 (-18.3; 19.2)  | 7.7 (-14.6; 15.5)  | 8.0 (-15.3; 16.1)  |
| 12 or more years       |                     |                    |                    |                    |                    |                    |                    |                    |                    |                    |                    |                    |
| Total                  | 5.6 (5.1; 6.2)      | 5.7 (5.1; 6.2)     | 6.6 (6.0; 7.1)     | 6.8 (6.3; 7.4)     | 6.3 (5.7; 6.8)     | 6.2 (5.7; 6.8)     | 5.8 (5.4; 6.2)     | 6.7 (6.2; 7.3)     | 6.4 (6.0; 6.8)     | 8.4 (8.0; 8.9)     | 6.6 (6.2; 7.0)     | 6.4 (6.0; 6.7)     |
| Female*                | 4.7 (-9.1; 9.1)     | 4.7 (-9.2; 9.2)    | 5.9 (-11.5; 11.5)  | 6.5 (-12.7; 12.7)  | 5.6 (-11.0; 11.0)  | 6.0 (-11.7; 11.7)  | 5.4 (-10.5; 10.5)  | 6.7 (-13.2; 13.2)  | 6.1 (-12.0; 12.0)  | 7.9 (-15.6; 15.6)  | 6.1 (-11.9; 11.9)  | 6.1 (-11.9; 11.9)  |
| Male                   | 7.1 (-13.6; 14.3)   | 7.2 (-13.7; 14.4)  | 7.7 (-14.7; 15.4)  | 7.4 (-14.2; 14.9)  | 7.4 (-14.1; 14.7)  | 6.6 (-12.7; 13.4)  | 6.6 (-12.6; 13.2)  | 6.7 (-12.9; 13.6)  | 6.9 (-13.2; 13.7)  | 9.3 (-17.9; 18.5)  | 7.6 (-14.6; 15.1)  | 6.9 (-13.2; 13.7)  |
| White*                 | 5.7 (-10.6; 11.6)   | 5.6 (-10.5; 11.5)  | 6.7 (-12.6; 13.6)  | 7.1 (-13.5; 14.3)  | 6.7 (-12.8; 13.7)  | 6.3 (-11.9; 12.7)  | 6.4 (-12.2; 13.0)  | 7.3 (-13.9; 14.8)  | 7.0 (-13.3; 14.0)  | 9.3 (-17.8; 18.5)  | 7.2 (-13.8; 14.5)  | 6.8 (-13.0; 13.6)  |
| Non-white              | 5.6 (-10.6; 11.3)   | 5.7 (-10.9; 11.6)  | 6.4 (-12.2; 13.0)  | 6.5 (-12.4; 13.2)  | 5.6 (-10.6; 11.3)  | 6.2 (-11.7; 12.4)  | 5.0 (-9.5; 10.2)   | 6.1 (-11.5; 12.3)  | 5.8 (-11.0; 11.6)  | 7.4 (-14.2; 14.9)  | 5.7 (-10.9; 11.5)  | 5.6 (-10.7; 11.2)  |

\*p&lt;0.05; \*\*p&lt;0.01; \*\*\*p&lt;0.001.

**Supplementary table 3: Age-standardized prevalence of smoking by years of education, sex and skin color, VIGITEL 2007-2018**

| Years of education     | Smoking % (95% CI) |                    |                    |                    |                    |                    |                    |                    |                    |                    |                    |                    |
|------------------------|--------------------|--------------------|--------------------|--------------------|--------------------|--------------------|--------------------|--------------------|--------------------|--------------------|--------------------|--------------------|
| Sex and skin color (%) | 2007               | 2008               | 2009               | 2010               | 2011               | 2012               | 2013               | 2014               | 2015               | 2016               | 2017               | 2018               |
| 0-3 years              |                    |                    |                    |                    |                    |                    |                    |                    |                    |                    |                    |                    |
| Total***               | 13.0 (11.7; 14.2)  | 12.9 (11.6; 14.1)  | 12.6 (11.3; 13.9)  | 11.6 (10.4; 12.9)  | 12.4 (11.2; 13.6)  | 11.0 (9.5; 12.4)   | 11.8 (10.3; 13.3)  | 11.7 (10.1; 13.4)  | 9.9 (8.7; 11.1)    | 11.8 (10.2; 13.3)  | 9.8 (8.6; 11.0)    | 9.0 (7.9; 10.2)    |
| Female***              | 10.7 (-21.0; 21.0) | 11.1 (-21.8; 21.8) | 10.9 (-21.3; 21.3) | 10.9 (-21.3; 21.3) | 10.1 (-19.9; 19.9) | 9.5 (-18.7; 18.7)  | 9.7 (-19.1; 19.1)  | 10.4 (-20.3; 20.3) | 8.3 (-16.4; 16.4)  | 10.3 (-20.2; 20.2) | 8.5 (-16.6; 16.6)  | 9.0 (-17.6; 17.6)  |
| Male**                 | 18.6 (-35.8; 37.2) | 17.4 (-33.4; 34.9) | 17.1 (-32.7; 34.2) | 13.6 (-25.9; 27.4) | 18.5 (-35.5; 36.9) | 14.8 (-28.1; 29.8) | 16.7 (-32.0; 33.7) | 15.3 (-29.0; 31.0) | 14.3 (-27.3; 28.7) | 15.3 (-29.1; 30.9) | 13.3 (-25.3; 26.7) | 9.1 (-17.1; 18.5)  |
| White*                 | 10.4 (-18.9; 21.6) | 9.9 (-18.1; 20.6)  | 10.9 (-20.1; 22.7) | 9.7 (-17.9; 20.2)  | 11.4 (-21.0; 23.6) | 11.4 (-20.9; 24.0) | 10.2 (-18.6; 21.6) | 10.7 (-19.3; 22.6) | 8.2 (-14.7; 17.3)  | 9.4 (-16.9; 19.9)  | 8.2 (-14.8; 17.2)  | 8.1 (-14.8; 16.9)  |
| Non-white**            | 14.1 (-26.6; 28.8) | 14.2 (-26.7; 28.8) | 13.2 (-24.6; 27.1) | 12.5 (-23.4; 25.6) | 13.0 (-24.5; 26.5) | 10.6 (-19.6; 22.1) | 13.1 (-24.6; 26.7) | 12.6 (-23.4; 25.9) | 10.9 (-20.4; 22.3) | 13.8 (-26.1; 28.1) | 10.4 (-19.4; 21.3) | 9.2 (-17.0; 18.9)  |
| 4-8 years              |                    |                    |                    |                    |                    |                    |                    |                    |                    |                    |                    |                    |
| Total***               | 14.4 (13.6; 15.1)  | 15.0 (14.2; 15.8)  | 14.7 (13.9; 15.5)  | 14.3 (13.5; 15.1)  | 13.6 (12.9; 14.4)  | 13.5 (12.6; 14.4)  | 11.4 (10.7; 12.2)  | 11.7 (10.8; 12.5)  | 10.4 (9.7; 11.1)   | 10.8 (10.1; 11.6)  | 10.0 (9.3; 10.7)   | 10.8 (10.1; 11.5)  |
| Female***              | 11.6 (-22.7; 22.7) | 12.6 (-24.8; 24.8) | 12.7 (-24.8; 24.8) | 12.2 (-24.0; 24.0) | 10.9 (-21.4; 21.4) | 11.3 (-22.1; 22.1) | 9.5 (-18.6; 18.6)  | 9.9 (-19.3; 19.3)  | 8.8 (-17.2; 17.2)  | 8.7 (-17.1; 17.1)  | 8.0 (-15.6; 15.6)  | 9.1 (-17.8; 17.8)  |
| Male***                | 19.9 (-38.6; 39.6) | 19.9 (-38.4; 39.4) | 19.0 (-36.7; 37.8) | 18.6 (-36.0; 37.0) | 19.0 (-36.8; 37.7) | 18.1 (-35.0; 36.1) | 15.7 (-30.3; 31.2) | 15.7 (-30.2; 31.2) | 13.7 (-26.5; 27.4) | 15.1 (-29.2; 30.1) | 14.2 (-27.5; 28.3) | 14.6 (-28.2; 29.1) |
| White***               | 13.7 (-26.2; 27.6) | 13.2 (-25.1; 26.6) | 13.4 (-25.5; 27.0) | 12.7 (-24.1; 25.5) | 12.7 (-24.2; 25.6) | 12.1 (-23.0; 24.6) | 10.8 (-20.4; 21.8) | 10.4 (-19.6; 21.3) | 10.5 (-20.0; 21.3) | 10.5 (-19.8; 21.3) | 9.8 (-18.6; 20.0)  | 10.0 (-18.9; 20.3) |
| Non-white***           | 14.7 (-28.2; 29.6) | 16.0 (-30.7; 32.0) | 15.4 (-29.5; 30.9) | 15.2 (-29.1; 30.4) | 14.3 (-27.5; 28.7) | 14.6 (-28.0; 29.3) | 12.0 (-22.9; 24.1) | 12.7 (-24.2; 25.5) | 10.3 (-19.6; 20.8) | 11.1 (-21.2; 22.3) | 10.3 (-19.6; 20.7) | 11.3 (-21.7; 22.8) |
| 9-11 years             |                    |                    |                    |                    |                    |                    |                    |                    |                    |                    |                    |                    |
| Total***               | 12.9 (12.3; 13.6)  | 11.4 (10.8; 11.9)  | 11.4 (10.9; 12.0)  | 10.8 (10.3; 11.4)  | 10.4 (9.9; 10.9)   | 9.5 (8.9; 10.0)    | 8.8 (8.3; 9.3)     | 8.2 (7.7; 8.8)     | 8.0 (7.6; 8.5)     | 7.7 (7.3; 8.2)     | 7.4 (7.0; 7.9)     | 7.3 (6.9; 7.7)     |
| Female***              | 11.2 (-22.0; 22.0) | 9.6 (-18.8; 18.8)  | 9.4 (-18.5; 18.5)  | 9.7 (-19.1; 19.1)  | 8.9 (-17.4; 17.4)  | 8.0 (-15.7; 15.7)  | 7.1 (-14.0; 14.0)  | 7.1 (-13.8; 13.8)  | 6.4 (-12.6; 12.6)  | 6.7 (-13.1; 13.1)  | 6.1 (-11.9; 11.9)  | 5.9 (-11.6; 11.6)  |
| Male***                | 15.9 (-30.7; 31.5) | 14.4 (-27.8; 28.5) | 14.9 (-28.8; 29.5) | 12.8 (-24.8; 25.5) | 12.9 (-24.9; 25.5) | 12.0 (-23.2; 23.9) | 11.6 (-22.4; 23.1) | 10.2 (-19.6; 20.3) | 10.7 (-20.8; 21.3) | 9.5 (-18.4; 18.9)  | 9.7 (-18.7; 19.3)  | 9.7 (-18.7; 19.3)  |
| White***               | 13.3 (-25.6; 26.6) | 12.1 (-23.2; 24.2) | 12.2 (-23.4; 24.4) | 12.4 (-23.8; 24.7) | 11.3 (-21.6; 22.5) | 10.9 (-21.0; 21.9) | 9.6 (-18.5; 19.3)  | 9.4 (-18.0; 18.9)  | 9.3 (-17.8; 18.6)  | 8.6 (-16.4; 17.2)  | 8.8 (-16.8; 17.6)  | 8.5 (-16.3; 17.1)  |
| Non-white***           | 12.7 (-24.3; 25.3) | 10.9 (-20.8; 21.8) | 10.9 (-20.9; 21.9) | 9.8 (-18.8; 19.8)  | 9.8 (-18.7; 19.6)  | 8.4 (-15.9; 16.9)  | 8.2 (-15.7; 16.5)  | 7.4 (-14.1; 15.0)  | 7.3 (-13.9; 14.7)  | 7.2 (-13.7; 14.5)  | 6.6 (-12.6; 13.4)  | 6.4 (-12.2; 13.0)  |
| 12 or more years       |                    |                    |                    |                    |                    |                    |                    |                    |                    |                    |                    |                    |
| Total***               | 11.8 (11.1; 12.4)  | 10.7 (10.0; 11.3)  | 9.9 (9.3; 10.5)    | 9.1 (8.6; 9.7)     | 9.1 (8.5; 9.6)     | 8.0 (7.4; 8.6)     | 6.8 (6.3; 7.2)     | 6.8 (6.3; 7.4)     | 6.6 (6.2; 7.0)     | 6.3 (5.9; 6.7)     | 6.2 (5.8; 6.6)     | 5.6 (5.2; 5.9)     |
| Female***              | 10.1 (-19.8; 19.8) | 9.4 (-18.4; 18.4)  | 9.1 (-17.9; 17.9)  | 8.1 (-15.9; 15.9)  | 8.2 (-16.1; 16.1)  | 6.8 (-13.4; 13.4)  | 6.0 (-11.7; 11.7)  | 6.1 (-11.9; 11.9)  | 5.6 (-11.0; 11.0)  | 5.0 (-9.8; 9.8)    | 5.2 (-10.2; 10.2)  | 4.5 (-8.9; 8.9)    |
| Male***                | 14.3 (-27.7; 28.5) | 12.7 (-24.4; 25.2) | 11.2 (-21.5; 22.2) | 10.9 (-21.0; 21.7) | 10.5 (-20.2; 20.9) | 10.0 (-19.3; 20.0) | 8.2 (-15.7; 16.3)  | 8.1 (-15.6; 16.3)  | 8.2 (-15.8; 16.3)  | 8.5 (-16.4; 16.9)  | 7.9 (-15.3; 15.7)  | 7.3 (-14.1; 14.6)  |
| White***               | 12.3 (-23.5; 24.6) | 12.0 (-23.0; 24.1) | 11.4 (-21.8; 22.8) | 10.3 (-19.7; 20.6) | 10.0 (-19.2; 20.2) | 9.4 (-17.9; 18.9)  | 7.8 (-14.9; 15.7)  | 8.7 (-16.5; 17.5)  | 8.0 (-15.2; 16.0)  | 7.2 (-13.8; 14.5)  | 7.4 (-14.1; 14.8)  | 6.6 (-12.6; 13.3)  |
| Non-white***           | 11.1 (-21.4; 22.3) | 9.0 (-17.2; 18.1)  | 8.1 (-15.5; 16.4)  | 7.7 (-14.7; 15.5)  | 7.7 (-14.7; 15.5)  | 6.2 (-11.8; 12.7)  | 5.5 (-10.4; 11.1)  | 4.6 (-8.7; 9.5)    | 4.9 (-9.3; 10.0)   | 5.2 (-9.9; 10.5)   | 4.6 (-8.8; 9.4)    | 4.2 (-7.8; 8.4)    |

\*p&lt;0.05; \*\*p&lt;0.01; \*\*\*p&lt;0.001.

**Supplementary table 4: Age-standardized prevalence of obesity by years of education, sex and skin color, VIGITEL 2007-2018.**

| Years of education     | Obesity - Year (95% CI) |                    |                    |                    |                    |                    |                    |                    |                    |                    |                    |                    |
|------------------------|-------------------------|--------------------|--------------------|--------------------|--------------------|--------------------|--------------------|--------------------|--------------------|--------------------|--------------------|--------------------|
| Sex and skin color (%) | 2007                    | 2008               | 2009               | 2010               | 2011               | 2012               | 2013               | 2014               | 2015               | 2016               | 2017               | 2018               |
| 0-3 years              |                         |                    |                    |                    |                    |                    |                    |                    |                    |                    |                    |                    |
| Total***               | 21.3 (19.6; 22.9)       | 23.2 (21.5; 24.9)  | 22.7 (21.0; 24.5)  | 22.7 (20.9; 24.4)  | 24.1 (22.4; 25.7)  | 25.6 (23.4; 27.7)  | 23.5 (21.5; 25.4)  | 26.5 (24.2; 28.8)  | 26.8 (24.9; 28.6)  | 27.6 (25.6; 29.6)  | 27.1 (25.3; 28.9)  | 28.4 (26.7; 30.2)  |
| Female***              | 23.8 (-46.6; 46.6)      | 26.8 (-52.5; 52.5) | 25.2 (-49.3; 49.3) | 25.3 (-49.7; 49.7) | 27.1 (-53.2; 53.2) | 28.9 (-56.5; 56.5) | 26.2 (-51.4; 51.4) | 29.6 (-58.0; 58.0) | 29.4 (-57.7; 57.7) | 30.3 (-59.3; 59.3) | 29.6 (-58.1; 58.1) | 31.2 (-61.2; 61.2) |
| Male***                | 15.0 (-28.4; 30.5)      | 14.1 (-26.5; 28.6) | 16.2 (-30.7; 33.0) | 15.9 (-30.0; 32.2) | 16.0 (-30.2; 32.3) | 16.8 (-31.4; 34.2) | 17.0 (-31.9; 34.5) | 18.4 (-34.5; 37.5) | 19.5 (-37.0; 39.3) | 21.2 (-40.3; 42.9) | 20.8 (-39.6; 41.9) | 21.1 (-40.3; 42.5) |
| White***               | 20.5 (-39.0; 41.4)      | 23.3 (-44.4; 46.7) | 20.3 (-38.4; 41.1) | 21.4 (-40.7; 43.3) | 24.6 (-46.9; 49.4) | 24.5 (-46.4; 49.6) | 24.3 (-46.1; 49.0) | 26.3 (-49.9; 53.4) | 25.9 (-49.3; 52.2) | 28.2 (-53.7; 56.8) | 26.7 (-50.9; 53.7) | 26.6 (-50.8; 53.6) |
| Non-white***           | 21.6 (-40.9; 43.9)      | 23.2 (-43.9; 47.1) | 23.7 (-44.8; 48.1) | 23.2 (-43.9; 47.1) | 23.8 (-45.2; 48.1) | 26.3 (-49.9; 53.3) | 22.8 (-43.1; 46.3) | 26.6 (-50.4; 54.0) | 27.2 (-51.8; 55.0) | 27.1 (-51.6; 54.7) | 26.2 (-49.8; 52.8) | 28.7 (-54.7; 57.7) |
| 4-8 years              |                         |                    |                    |                    |                    |                    |                    |                    |                    |                    |                    |                    |
| Total***               | 17.0 (16.2; 17.9)       | 18.7 (17.7; 19.6)  | 19.3 (18.4; 20.3)  | 20.2 (19.3; 21.1)  | 20.6 (19.7; 21.6)  | 22.0 (20.9; 23.1)  | 22.4 (21.4; 23.4)  | 22.8 (21.7; 23.9)  | 23.9 (22.9; 24.8)  | 24.6 (23.6; 25.6)  | 23.9 (22.9; 24.8)  | 24.5 (23.6; 25.5)  |
| Female***              | 17.9 (-35.0; 35.0)      | 20.4 (-40.1; 40.1) | 20.5 (-40.2; 40.2) | 21.3 (-41.8; 41.8) | 22.1 (-43.3; 43.3) | 23.8 (-46.6; 46.6) | 23.6 (-46.3; 46.3) | 24.7 (-48.4; 48.4) | 25.7 (-50.3; 50.3) | 25.9 (-50.7; 50.7) | 24.5 (-48.0; 48.0) | 26.4 (-51.7; 51.7) |
| Male***                | 15.4 (-29.6; 30.8)      | 15.0 (-28.7; 29.9) | 16.9 (-32.4; 33.7) | 17.9 (-34.4; 35.6) | 17.8 (-34.2; 35.4) | 18.3 (-35.2; 36.6) | 19.8 (-38.2; 39.5) | 18.6 (-35.7; 37.2) | 20.2 (-39.0; 40.3) | 22.0 (-42.5; 43.9) | 22.5 (-43.6; 44.8) | 20.5 (-39.5; 40.8) |
| White***               | 16.7 (-32.0; 33.3)      | 19.3 (-37.2; 38.5) | 19.4 (-37.3; 38.7) | 20.4 (-39.2; 40.7) | 20.3 (-39.2; 40.5) | 22.0 (-42.4; 44.0) | 21.9 (-42.2; 43.8) | 22.8 (-43.8; 45.5) | 23.8 (-45.9; 47.4) | 24.6 (-47.4; 49.0) | 23.5 (-45.1; 46.8) | 24.4 (-47.1; 48.7) |
| Non-white***           | 17.3 (-33.0; 34.6)      | 18.3 (-35.0; 36.7) | 19.3 (-36.9; 38.7) | 20.1 (-38.5; 40.3) | 20.8 (-40.1; 41.6) | 22.0 (-42.2; 44.0) | 22.9 (-44.0; 45.6) | 22.8 (-43.8; 45.6) | 24.0 (-46.2; 47.8) | 24.6 (-47.5; 49.0) | 24.4 (-47.1; 48.6) | 24.5 (-47.2; 48.7) |
| 9-11 years             |                         |                    |                    |                    |                    |                    |                    |                    |                    |                    |                    |                    |
| Total***               | 12.8 (12.2; 13.4)       | 13.9 (13.2; 14.5)  | 14.4 (13.8; 15.1)  | 16.0 (15.3; 16.6)  | 16.5 (15.9; 17.1)  | 17.4 (16.7; 18.1)  | 17.5 (16.8; 18.1)  | 18.5 (17.8; 19.3)  | 18.7 (18.1; 19.3)  | 19.1 (18.4; 19.8)  | 18.5 (17.9; 19.2)  | 19.6 (18.9; 20.2)  |
| Female***              | 12.2 (-23.8; 23.8)      | 13.5 (-26.4; 26.4) | 14.2 (-27.9; 27.9) | 15.6 (-30.6; 30.6) | 16.2 (-31.7; 31.7) | 17.5 (-34.3; 34.3) | 17.2 (-33.7; 33.7) | 18.8 (-36.8; 36.8) | 19.1 (-37.4; 37.4) | 19.3 (-37.9; 37.9) | 18.6 (-36.4; 36.4) | 19.9 (-38.9; 38.9) |
| Male***                | 14.0 (-27.0; 27.8)      | 14.5 (-28.0; 28.9) | 14.8 (-28.5; 29.3) | 16.6 (-32.1; 33.0) | 17.0 (-32.9; 33.7) | 17.2 (-33.3; 34.3) | 17.9 (-34.7; 35.5) | 18.1 (-35.0; 36.0) | 18.0 (-34.8; 35.7) | 18.7 (-36.2; 37.1) | 18.5 (-35.7; 36.6) | 19.0 (-36.9; 37.7) |
| White***               | 12.8 (-24.6; 25.5)      | 14.0 (-26.9; 27.9) | 14.3 (-27.5; 28.4) | 15.8 (-30.4; 31.4) | 16.9 (-32.6; 33.6) | 18.1 (-34.9; 35.9) | 16.9 (-32.7; 33.7) | 18.5 (-35.7; 36.8) | 18.1 (-35.0; 36.0) | 18.4 (-35.6; 36.6) | 17.6 (-34.0; 35.0) | 18.9 (-36.5; 37.6) |
| Non-white***           | 12.9 (-24.7; 25.7)      | 13.8 (-26.5; 27.6) | 14.5 (-27.9; 29.0) | 16.1 (-31.0; 32.1) | 16.2 (-31.2; 32.3) | 16.9 (-32.6; 33.7) | 17.9 (-34.5; 35.5) | 18.6 (-35.8; 37.0) | 19.0 (-36.8; 37.8) | 19.6 (-37.8; 38.9) | 18.9 (-36.5; 37.6) | 19.6 (-37.8; 38.9) |
| 12 or more years       |                         |                    |                    |                    |                    |                    |                    |                    |                    |                    |                    |                    |
| Total***               | 11.6 (11.0; 12.3)       | 11.5 (10.9; 12.1)  | 12.8 (12.1; 13.4)  | 13.3 (12.7; 13.9)  | 14.7 (14.1; 15.4)  | 14.9 (14.2; 15.6)  | 15.2 (14.6; 15.8)  | 15.0 (14.2; 15.7)  | 15.1 (14.6; 15.7)  | 15.6 (15.1; 16.2)  | 16.1 (15.5; 16.7)  | 16.8 (16.2; 17.4)  |
| Female***              | 9.4 (-18.5; 18.5)       | 9.4 (-18.4; 18.4)  | 11.3 (-22.2; 22.2) | 12.0 (-23.5; 23.5) | 13.0 (-25.4; 25.4) | 13.7 (-26.8; 26.8) | 12.7 (-24.9; 24.9) | 13.5 (-26.4; 26.4) | 13.5 (-26.5; 26.5) | 13.8 (-27.1; 27.1) | 14.3 (-28.0; 28.0) | 15.1 (-29.5; 29.5) |
| Male***                | 15.1 (-29.1; 29.9)      | 14.9 (-28.8; 29.6) | 15.0 (-29.0; 29.9) | 15.6 (-30.2; 31.0) | 17.6 (-34.1; 34.9) | 17.0 (-32.8; 33.7) | 19.5 (-37.8; 38.5) | 17.5 (-33.8; 34.7) | 17.8 (-34.6; 35.3) | 18.6 (-36.1; 36.8) | 19.2 (-37.2; 37.9) | 19.7 (-38.2; 38.9) |
| White***               | 11.2 (-21.5; 22.6)      | 11.1 (-21.2; 22.3) | 12.2 (-23.4; 24.4) | 12.8 (-24.6; 25.6) | 14.1 (-27.1; 28.2) | 14.4 (-27.7; 28.9) | 14.9 (-28.7; 29.8) | 14.5 (-27.8; 29.0) | 14.7 (-28.3; 29.3) | 15.1 (-29.0; 30.0) | 14.9 (-28.7; 29.7) | 16.1 (-31.0; 32.0) |
| Non-white***           | 12.2 (-23.4; 24.3)      | 12.0 (-23.1; 24.0) | 13.5 (-26.0; 26.9) | 13.9 (-26.9; 27.7) | 15.5 (-30.0; 30.9) | 15.5 (-29.8; 30.8) | 15.6 (-30.1; 30.9) | 15.5 (-29.9; 30.9) | 15.6 (-30.2; 31.0) | 16.3 (-31.6; 32.4) | 17.4 (-33.6; 34.4) | 17.3 (-33.4; 34.2) |

\*p&lt;0.05; \*\*p&lt;0.01; \*\*\*p&lt;0.001.

1  
2  
3  
4  
5  
6  
7  
8  
9  
10  
11  
12  
13  
14  
15  
16  
17  
18  
19  
20  
21  
22  
23  
24  
25  
26  
27  
28  
29  
30  
31  
32  
33  
34  
35  
36  
37  
38  
39  
40  
41  
42  
43  
44  
45  
46  
47  
48  
49  
50  
51  
52  
53  
54  
55  
56  
57  
58  
59  
60STROBE Statement—Checklist of items that should be included in reports of *cross-sectional studies*

|                              | Item No | Recommendation                                                                                                                                                                                                                                                                                                                                                                                                                                                      |
|------------------------------|---------|---------------------------------------------------------------------------------------------------------------------------------------------------------------------------------------------------------------------------------------------------------------------------------------------------------------------------------------------------------------------------------------------------------------------------------------------------------------------|
| <b>Title and abstract</b>    | 1       | Indicate the study's design with a commonly used term in the title or the abstract<br><a href="#">Page 2</a><br>(b) Provide in the abstract an informative and balanced summary of what was done and what was found <a href="#">Page 2</a>                                                                                                                                                                                                                          |
| <b>Introduction</b>          |         |                                                                                                                                                                                                                                                                                                                                                                                                                                                                     |
| Background/rationale         | 2       | Explain the scientific background and rationale for the investigation being reported<br><a href="#">Page 3</a>                                                                                                                                                                                                                                                                                                                                                      |
| Objectives                   | 3       | State specific objectives, including any prespecified hypotheses<br><a href="#">Page 3</a>                                                                                                                                                                                                                                                                                                                                                                          |
| <b>Methods</b>               |         |                                                                                                                                                                                                                                                                                                                                                                                                                                                                     |
| Study design                 | 4       | Present key elements of study design early in the paper<br><a href="#">Page 4</a>                                                                                                                                                                                                                                                                                                                                                                                   |
| Setting                      | 5       | Describe the setting, locations, and relevant dates, including periods of recruitment, exposure, follow-up, and data collection<br><a href="#">Page 4</a>                                                                                                                                                                                                                                                                                                           |
| Participants                 | 6       | Give the eligibility criteria, and the sources and methods of selection of participants<br><a href="#">Page 4</a>                                                                                                                                                                                                                                                                                                                                                   |
| Variables                    | 7       | Clearly define all outcomes, exposures, predictors, potential confounders, and effect modifiers. Give diagnostic criteria, if applicable<br><a href="#">Pages 4-5</a>                                                                                                                                                                                                                                                                                               |
| Data sources/<br>measurement | 8*      | For each variable of interest, give sources of data and details of methods of assessment (measurement). Describe comparability of assessment methods if there is more than one group <a href="#">Pages 4-5</a>                                                                                                                                                                                                                                                      |
| Bias                         | 9       | Describe any efforts to address potential sources of bias <a href="#">pages 4-5</a>                                                                                                                                                                                                                                                                                                                                                                                 |
| Study size                   | 10      | Explain how the study size was arrived at <a href="#">page 4</a>                                                                                                                                                                                                                                                                                                                                                                                                    |
| Quantitative variables       | 11      | Explain how quantitative variables were handled in the analyses. If applicable, describe which groupings were chosen and why <a href="#">Page 5</a>                                                                                                                                                                                                                                                                                                                 |
| Statistical methods          | 12      | (a) Describe all statistical methods, including those used to control for confounding<br><a href="#">Page 5</a><br>(b) Describe any methods used to examine subgroups and interactions <a href="#">Page 5</a><br>(c) Explain how missing data were addressed <a href="#">Page 5</a><br>(d) If applicable, describe analytical methods taking account of sampling strategy<br><a href="#">Page 5</a><br>(e) Describe any sensitivity analyses <a href="#">Page 5</a> |
| <b>Results</b>               |         |                                                                                                                                                                                                                                                                                                                                                                                                                                                                     |
| Participants                 | 13*     | (a) Report numbers of individuals at each stage of study—eg numbers potentially eligible, examined for eligibility, confirmed eligible, included in the study, completing follow-up, and analysed <a href="#">Page 4</a><br>(b) Give reasons for non-participation at each stage <a href="#">Page 4</a><br>(c) Consider use of a flow diagram <a href="#">NA</a>                                                                                                    |
| Descriptive data             | 14*     | (a) Give characteristics of study participants (eg demographic, clinical, social) and information on exposures and potential confounders <a href="#">Table 1</a><br>(b) Indicate number of participants with missing data for each variable of interest                                                                                                                                                                                                             |

page 4

|                          |     |                                                                                                                                                                                                                                                                                                                                                                                                                                                                                              |
|--------------------------|-----|----------------------------------------------------------------------------------------------------------------------------------------------------------------------------------------------------------------------------------------------------------------------------------------------------------------------------------------------------------------------------------------------------------------------------------------------------------------------------------------------|
| Outcome data             | 15* | Report numbers of outcome events or summary measures <a href="#">Table 1</a>                                                                                                                                                                                                                                                                                                                                                                                                                 |
| Main results             | 16  | (a) Give unadjusted estimates and, if applicable, confounder-adjusted estimates and their precision (eg, 95% confidence interval). Make clear which confounders were adjusted for and why they were included <a href="#">Figures 1, 2 and 3</a><br>(b) Report category boundaries when continuous variables were categorized <a href="#">NA</a><br>(c) If relevant, consider translating estimates of relative risk into absolute risk for a meaningful time period <a href="#">Figure 1</a> |
| Other analyses           | 17  | Report other analyses done—eg analyses of subgroups and interactions, and sensitivity analyses <a href="#">Figures 2 and 3</a>                                                                                                                                                                                                                                                                                                                                                               |
| <b>Discussion</b>        |     |                                                                                                                                                                                                                                                                                                                                                                                                                                                                                              |
| Key results              | 18  | Summarise key results with reference to study objectives <a href="#">Page 8</a>                                                                                                                                                                                                                                                                                                                                                                                                              |
| Limitations              | 19  | Discuss limitations of the study, taking into account sources of potential bias or imprecision. Discuss both direction and magnitude of any potential bias<br><a href="#">Page 11</a>                                                                                                                                                                                                                                                                                                        |
| Interpretation           | 20  | Give a cautious overall interpretation of results considering objectives, limitations, multiplicity of analyses, results from similar studies, and other relevant evidence<br><a href="#">Page 11</a>                                                                                                                                                                                                                                                                                        |
| Generalisability         | 21  | Discuss the generalisability (external validity) of the study results <a href="#">Page 11</a>                                                                                                                                                                                                                                                                                                                                                                                                |
| <b>Other information</b> |     |                                                                                                                                                                                                                                                                                                                                                                                                                                                                                              |
| Funding                  | 22  | Give the source of funding and the role of the funders for the present study and, if applicable, for the original study on which the present article is based <a href="#">page 6</a>                                                                                                                                                                                                                                                                                                         |

\*Give information separately for exposed and unexposed groups.

**Note:** An Explanation and Elaboration article discusses each checklist item and gives methodological background and published examples of transparent reporting. The STROBE checklist is best used in conjunction with this article (freely available on the Web sites of PLoS Medicine at <http://www.plosmedicine.org/>, Annals of Internal Medicine at <http://www.annals.org/>, and Epidemiology at <http://www.epidem.com/>). Information on the STROBE Initiative is available at [www.strobe-statement.org](http://www.strobe-statement.org).



# BMJ Open

## EDUCATIONAL DISPARITIES IN HYPERTENSION, DIABETES, OBESITY AND SMOKING IN BRAZIL: A TREND ANALYSIS OF 578,977 ADULTS FROM A NATIONAL SURVEY, 2007 TO 2018.

|                                 |                                                                                                                                                                                                                                                                                                                                                                                                                                                                                                                                                |
|---------------------------------|------------------------------------------------------------------------------------------------------------------------------------------------------------------------------------------------------------------------------------------------------------------------------------------------------------------------------------------------------------------------------------------------------------------------------------------------------------------------------------------------------------------------------------------------|
| Journal:                        | <i>BMJ Open</i>                                                                                                                                                                                                                                                                                                                                                                                                                                                                                                                                |
| Manuscript ID                   | bmjopen-2020-046154.R1                                                                                                                                                                                                                                                                                                                                                                                                                                                                                                                         |
| Article Type:                   | Original research                                                                                                                                                                                                                                                                                                                                                                                                                                                                                                                              |
| Date Submitted by the Author:   | 10-Mar-2021                                                                                                                                                                                                                                                                                                                                                                                                                                                                                                                                    |
| Complete List of Authors:       | Toteff Dulgheroff, Pedro; Universidade Federal de Uberlandia, Faculdade de Medicina<br>da Silva, Luciana; Universidade Federal de Uberlandia, Faculdade de Medicina<br>Madalena Rinaldi, Ana Elisa; Universidade Federal de Uberlandia, Faculdade de Medicina<br>Rezende, Leandro; Universidade Federal de Sao Paulo, Medicina Preventiva<br>Souza Marques, Emanuele; Universidade do Estado do Rio de Janeiro, Instituto de Medicina Social<br>Azeredo, Catarina; Universidade Federal de Uberlandia - Campus Umuarama, Faculdade de Medicina |
| <b>Primary Subject Heading</b>: | Global health                                                                                                                                                                                                                                                                                                                                                                                                                                                                                                                                  |
| Secondary Subject Heading:      | Cardiovascular medicine, Diabetes and endocrinology, Epidemiology, Smoking and tobacco, Nutrition and metabolism                                                                                                                                                                                                                                                                                                                                                                                                                               |
| Keywords:                       | General diabetes < DIABETES & ENDOCRINOLOGY, Hypertension < CARDIOLOGY, EPIDEMIOLOGY, PUBLIC HEALTH, SOCIAL MEDICINE                                                                                                                                                                                                                                                                                                                                                                                                                           |
|                                 |                                                                                                                                                                                                                                                                                                                                                                                                                                                                                                                                                |

SCHOLARONE™  
Manuscripts

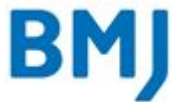

I, the Submitting Author has the right to grant and does grant on behalf of all authors of the Work (as defined in the below author licence), an exclusive licence and/or a non-exclusive licence for contributions from authors who are: i) UK Crown employees; ii) where BMJ has agreed a CC-BY licence shall apply, and/or iii) in accordance with the terms applicable for US Federal Government officers or employees acting as part of their official duties; on a worldwide, perpetual, irrevocable, royalty-free basis to BMJ Publishing Group Ltd ("BMJ") its licensees and where the relevant Journal is co-owned by BMJ to the co-owners of the Journal, to publish the Work in this journal and any other BMJ products and to exploit all rights, as set out in our [licence](#).

The Submitting Author accepts and understands that any supply made under these terms is made by BMJ to the Submitting Author unless you are acting as an employee on behalf of your employer or a postgraduate student of an affiliated institution which is paying any applicable article publishing charge ("APC") for Open Access articles. Where the Submitting Author wishes to make the Work available on an Open Access basis (and intends to pay the relevant APC), the terms of reuse of such Open Access shall be governed by a Creative Commons licence – details of these licences and which [Creative Commons](#) licence will apply to this Work are set out in our licence referred to above.

Other than as permitted in any relevant BMJ Author's Self Archiving Policies, I confirm this Work has not been accepted for publication elsewhere, is not being considered for publication elsewhere and does not duplicate material already published. I confirm all authors consent to publication of this Work and authorise the granting of this licence.

**EDUCATIONAL DISPARITIES IN HYPERTENSION, DIABETES, OBESITY AND  
SMOKING IN BRAZIL: A TREND ANALYSIS OF 578,977 ADULTS FROM A  
NATIONAL SURVEY, 2007 TO 2018.**

**Authors:**

Pedro Toteff Dulgheroff<sup>1</sup>, Luciana Saraiva da Silva<sup>1,2</sup>, Ana Elisa Madalena Rinaldi<sup>2</sup>, Leandro F. M. Rezende<sup>3</sup>, Emanuele Souza Marques<sup>4</sup>, Catarina Machado Azeredo<sup>1,2</sup>

1. Programa de Pós-graduação em Saúde da Família, Faculdade de Medicina, Universidade Federal de Uberlândia.
2. Curso de Nutrição, Faculdade de Medicina, Universidade Federal de Uberlândia.
3. Departamento de Medicina Preventiva, Escola Paulista de Medicina, Universidade Federal de São Paulo, São Paulo, Brazil.
4. Instituto de Medicina Social, Universidade do Estado do Rio de Janeiro, Rio de Janeiro, Brazil.

**Corresponding Author:**

Catarina Machado Azeredo

Address: Av Pará, 1720, Bloco 2 U, bairro Umuarama, Uberlândia, Minas Gerais. Cep 38.405-320

E-mail: [catarina.azeredo@yahoo.com.br](mailto:catarina.azeredo@yahoo.com.br)

Telephone: +55 (34) 3225-8584

Fax: +55 (34) 3232-8620

1  
2  
3  
4 **EDUCATIONAL DISPARITIES IN HYPERTENSION, DIABETES, OBESITY AND**  
5 **SMOKING IN BRAZIL: A TREND ANALYSIS OF 578,977 ADULTS FROM A**  
6 **NATIONAL SURVEY, 2007 TO 2018.**  
7  
8  
9

10  
11  
12  
13 **ABSTRACT**  
14

15  
16 **Objectives:** Our study aimed to assess social inequality trends for hypertension, diabetes  
17 mellitus, smoking and obesity from 2007 to 2018 in adults from Brazilian capitals.

18  
19 **Setting:** Data from the VIGITEL study, a cross-sectional telephone survey conducted annually  
20 from 2007 to 2018.  
21  
22

23 **Participants:** We used data from 578,977 Brazilian adults ( $\geq 18$  years).  
24

25 **Design:** Cross-sectional surveys conducted annually from 2007 to 2018.  
26

27 **Primary outcome measures:** Participants responded to a questionnaire about medical  
28 diagnosis of hypertension and diabetes, smoking status, weight and height. Educational  
29 inequalities (0-3, 4-8, 9-11 and 12 or more years of study) by sex and skin color were assessed  
30 through absolute (slope index of inequality – SII) and relative measures of inequality  
31 (concentration index – CIX), and trends were tested by Prais-Winsten.  
32  
33

34 **Results:** All outcomes were more prevalent in the least educated. The largest absolute  
35 educational inequality was observed for hypertension ( $SII_{total} = -37.8$  in 2018). During 2007-  
36 2018, the total educational disparity remained constant for hypertension, increased for diabetes  
37 and smoking, and decreased for obesity. Overall, inequality was higher among women and non-  
38 whites, compared to men and whites. We found a reduction in absolute inequality for  
39 hypertension among non-whites, an increase for diabetes in all strata, and an increase for  
40 smoking in women and non-whites. The relative inequality decreased in women and whites and  
41 increased for smoking in all strata, except among men.  
42  
43

44 **Conclusion:** The educational inequality reduced for obesity, remained constant for  
45 hypertension and increased for diabetes and smoking from 2007 to 2018 in Brazilian adults.  
46  
47  
48

49 **Funding:** Brazilian National Council of Scientific and Technological Development (CNPq),  
50 404905/2016-1.  
51  
52  
53

54 **Keywords:** Inequality, Hypertension, Diabetes, Smoking, Obesity, Adults.  
55  
56  
57  
58  
59  
60

### Strengths and limitations of this study

- We assessed the extent and trend of socioeconomic inequalities in major non-communicable diseases (hypertension and diabetes) and its risk factors (smoking and obesity) over 12 years in a middle-income country;
- We used large samples from Brazilian adults living in the 27 state Capitals in Brazil;
- We assessed educational inequalities in total sample and in subgroups of sex and race/skin color using complex measures of inequality.
- Using data from a telephone Survey (VIGITEL) limited our generalizability to those with landlines.
- The use of self-reported diseases may have affected our results underestimating inequality in hypertension and diabetes, as it may have underestimated the prevalence among least favored groups.

## INTRODUCTION

Non-communicable diseases (NCD) are the main cause of death in Brazil<sup>1</sup> and worldwide<sup>2</sup>. According to the Global Burden of Diseases, Injuries, and Risk Factors Study, in 2017, the four main risk factors for mortality and years of life lost due to disability in Brazil were systemic arterial hypertension, diabetes *mellitus*, obesity and smoking<sup>3</sup>. Importantly, these risk factors affect the less economically favored groups in a more pronounced way<sup>4-6</sup>, in addition to reinforcing poverty and income inequality by generating an increase in direct and indirect spending and loss of productivity<sup>7</sup>. A synthesis of 283 studies in low- and middle-income countries showed a positive association between low income, low socioeconomic status and low educational level with the occurrence of NCD<sup>8</sup>. In Brazil, adults with less education, non-whites and without health insurance had a higher prevalence of risk factors for NCD, such as smoking, leisure time physical inactivity, and lower consumption of fruits and vegetables<sup>9</sup>.

Trend analysis of the risk factors for NCD in Brazil showed that the prevalence of hypertension remained stable between 2006 and 2018, while diabetes and obesity grew and smoking dropped<sup>10</sup>. However, this trend did not occur homogeneously among social strata. Between 1998 and 2013, there was a reduction in educational inequalities for hypertension and coronary heart disease and an increase in inequality for diabetes in Brazilian adults<sup>5</sup>.

A sustained reduction in health inequities between countries is necessary<sup>8</sup>. However, trend studies on social inequality in the different risk factors for NCD that are essential for health planning are scarce in Brazil<sup>5</sup>, especially assessing risk factors concomitantly and based on educational disparities, also considering sex and color strata. Therefore, our aim was to assess social inequality trends for hypertension, diabetes, smoking and obesity among adults from Brazilian state capitals, from 2007 to 2018. We also performed subgroup analysis for education inequalities by skin color and sex.

## METHODS

### Study design and source of data and sample

This study used data collected by the Surveillance of Risk and Protection Factors for Chronic Diseases by Telephone Survey (VIGITEL), coordinated by the Ministry of Health of Brazil, from 2007 to 2018. VIGITEL is a cross-sectional system for monitoring the health of the adult population – over 18 years old, residing in the Brazilian capitals and the Federal District (DF), and who have a landline telephone – carried out annually since 2006. The sample stratification took place by telephone prefix until 2011, and subsequently by postal code (CEP). In order to reduce selection bias due to the partial coverage of the population by the landline telephone system, VIGITEL assigned a final weight to each individual, considering the inverse of the number of telephone lines in the household interviewed, the number of adults living in the household and the socio-demographic composition of the sample, based on the 2000 and 2010 demographic censuses. This weighting aimed to achieve representativeness for population aged 18 years and over of each state capital in Brazil, including DF in all years<sup>10</sup>, but it cannot be used as a representative sample of the whole country. However, it had limitations previously described<sup>11</sup>.

Data from 625,070 individuals interviewed between 2007 and 2018 were initially obtained. We excluded women who were pregnant and those who had doubts if they were or were not pregnant by the time of the interview (5,087 women); people aged 80 or older (22,234 individuals) because aging may affect self-reports<sup>12</sup>; people who did not want to or did not know how to respond to their skin color (20,699 respondents), corresponding to a loss of 46,093 (7.4%) observations compared to the original study. Thus, 578,977 participants were included in this study. During the analysis, there were 2 additional missing for skin color e 3 missing for obesity.

All data of the participants were self-reported. They answered about previous medical diagnosis of hypertension and diabetes (all types), if they were current smokers (yes/no) and their weight and height, used to calculate the Body Mass Index (BMI). We considered

BMI $\geq$ 30kg/m<sup>2</sup> for obesity<sup>13</sup>. Risk factors were described according educational level (i.e., years of study number: 0-3, 4-8, 9-11 and 12 or more study years), sex (women and men) and skin color (white and non-white). Skin color also was self-reported and included the categories: white (used for white color) and black, brown, mixed race, yellow (Asian), red (i.e. indigenous) and indigenous (used for non-white skin color).

### Statistical analysis

Prevalence of hypertension, diabetes, smoking and obesity (2007-2018) was age-standardized using the age distribution of the year 2018. We estimated absolute and relative complex measures of inequality, namely the slope index of inequality (SII) and the concentration index (CIX), respectively, and its 95% confidence interval. These measures of inequality are complementary and were calculated according to the World Health Organization<sup>14</sup> and Barros et al.<sup>15</sup>. The SII results from a linear regression of the cumulative population proportional distribution in each one of the four educational groups in this study and represents the absolute difference, in predicted values, on disease prevalence between the least and the most favored person, with no education and the highest possible education, taking into consideration the entire distribution of the stratification variable. The CIX assesses the relative difference between them and shows how concentrated are the diseases towards the least or most favored groups. CIX values should be read with caution because it can overestimate inequalities when the outcome of interest has a low frequency and may not be able to identify important inequalities when the outcome prevalence is high<sup>16</sup>.

The results of SII and CIX were multiplied by 100 to facilitate their visualization in tables and graphs, ranging from -100 to +100. On this scale, CIX values less than -20 or greater than 20 can be considered relevant indicators of inequality<sup>14</sup>. Results equal to zero represent a situation of total equality. When it is equal +100 or -100, we have the greater inequality possible.



Negative values indicate a higher prevalence of the risk factor in the least educated group, while positive ones represents greater prevalence in those most educated groups.

The different levels of education were used to calculate the total SII and CIX. Subsequently, the SII and CIX data for educational level schooling were stratified by sex and skin color. The time trend of the indicators was analyzed using the Prais-Winsten method modified by Durbin and Watson instead of traditional linear regression to avoid the autoregressive problem common in this social serial trend analysis<sup>17</sup>. Statistical analyses were performed using the STATA/SE® 15.1 software.

### **Ethical aspects**

VIGITEL was approved by the National Research Ethics Commission (CONEP). The VIGITEL database is in the public domain and does not allow identification of participants. It is available at the electronic address: <http://svs.aids.gov.br/download/Vigitel/>. The waiver of ethical review was approved by the Research Ethics Committee of the Federal University of Uberlândia, Minas Gerais (CAAE: 2,654,271).

### **Patient and public involvement**

No patients or public were involved in the design, or conduct, or reporting, or dissemination plans of our research.

## **RESULTS**

From 2007 to 2018, the profile of individuals evaluated remained similar, with a slight increase in the average of age (from 39.8 to 41.7 years) and similar distribution between sexes and skin color (53.2% female and 58.6% non-white in 2018). The average number of years of study showed a significant increase in the period, from 9.4 to 10.7 years of study. The

prevalence of hypertension remained constant in the period (34.1% in 2007 to 33.3% in 2018), with a reduction in smoking (from 13.0% to 7.4%), while the prevalence of diabetes (8.9% to 10.6%) and obesity increased (14.7% to 20.0%) (Table 1).

An educational gradient was observed for all four outcomes, with a higher prevalence among the least educated group. The largest prevalence discrepancy in 2018, between the least and the most educated groups, was observed for diabetes (24.4% and 6.4%) resulting in a difference of 281.3%, and the smallest for smoking (9.0% and 5.6%), where the prevalence difference between groups was 60.7%, with slight variations over the period (Figure 1 and Supplementary tables 1 to 4). For hypertension and obesity, these prevalence differences were: 60.7% versus 23.8% and 28.4% versus 16.8%, respectively.

Hypertension, diabetes, and obesity were more prevalent in women than in men, while smoking prevalence was higher in men. The prevalence of outcomes was higher in non-whites compared to whites for hypertension and obesity, and lower for diabetes and smoking. Supplementary Figures 1 and 2 and supplementary Tables 1 to 4 show the age-standardized prevalence of each outcome by years of study and stratified by sex, skin color and education.

Table 2 shows the absolute (SII) and relative (CIX) measures of educational inequality for the four outcomes and also by sex and skin color. Negative SII and CIX values for all outcomes reaffirm their higher prevalence among least educated group.

The absolute and relative educational inequality for hypertension, diabetes and obesity was, in general, higher among women than men and higher in non-white individuals compared to whites, represented by negative and higher SII and CIX values (Figures 2, 3 and 4). The exception was smoking, where SII and CIX were higher in men. Obesity showed higher absolute and relative inequality among whites (Figure 4). Over the period, relative inequality remained constant in hypertension (Figure 2), being higher in women than in men (Figure 3) and in non-whites in relation to whites (Figure 4). The absolute inequality in diabetes had a

1  
2  
3  
4 statistically significant increase in all strata (Figures 2, 3 and 4). This increase was greater in  
5  
6 men than in women, as well as in whites in relation to non-whites. The relative inequality in  
7  
8 diabetes remained constant over the period. The absolute inequality for obesity remained  
9  
10 constant, although there was a reduction in the relative inequality for the total sample and  
11  
12 between women and non-whites (Figures 2, 3 and 4). There was an increase in absolute  
13  
14 inequality in smoking between whites and women during the analyzed period. The relative  
15  
16 inequality in smoking increased in all strata, except among men, where it remained constant  
17  
18 (Figures 2, 3 and 4).  
19  
20  
21  
22  
23  
24

## 25 **DISCUSSION**

26  
27 In our study, diabetes, hypertension, obesity, and smoking remained more prevalent in  
28  
29 the least educated groups from 2007 to 2018 in Brazil. The absolute and relative educational  
30  
31 inequalities were higher among women and non-whites, compared to men and whites.  
32  
33 Hypertension was the outcome that had the highest absolute educational inequality, which  
34  
35 remained constant in the period; the absolute educational inequality for diabetes increased in  
36  
37 all strata. The absolute educational inequality remained constant for obesity, although the  
38  
39 relative one has reduced for the total sample, among women and non-whites. There was an  
40  
41 increase in the absolute educational inequality for smoking among women and whites and  
42  
43 relative educational inequality for all strata, except for men where it remained constant.  
44  
45  
46  
47

48 Hypertension had higher prevalence (33.3% in 2018) and the highest absolute  
49  
50 educational inequality (-37.8 in 2018). The prevalence in the least educated group was 60.7%.  
51  
52 A study carried out with Brazilian adults found that aging, black skin color, low education,  
53  
54 obesity, being a former smoker, self-reported diabetes, high cholesterol and high salt intake  
55  
56 were associated with a higher prevalence of hypertension<sup>18</sup>. In addition to individual factors, a  
57  
58 study conducted with the North American population indicated that states with greater  
59  
60

socioeconomic vulnerability, such as low family income and high percentages of the population below the poverty line were significantly associated with a high prevalence of self-reported hypertension<sup>19</sup>, which corroborates with the inequality findings in our study. However, although we found the highest educational inequality for hypertension, it remained constant in the period. On the other hand, educational inequality for diabetes increased in this period in all strata. Diabetes had the highest relative inequity in 2018 (-24.0). Trend analysis of the prevalence of diabetes, hypertension and heart disease from 1998 to 2013 also found an increase in diabetes disparities among a representative sample of Brazilian adults<sup>5</sup>. It is possible that strategies such as the Brazilian National Policy for the Comprehensive Health of the Black Population<sup>20</sup>, could have contributed to reduce race inequality by decreasing the prevalence of hypertension among non-whites. However, if this is true, we would expect to find a reduction in race inequality for diabetes. There are several potential explanations for the increase in educational inequalities for diabetes. This could have been partially driven by our finding of an increase in obesity prevalence over time, and higher prevalence among those less educated. Obesity is a stronger risk factor for diabetes than for hypertension<sup>21 22</sup>. It is also possible that the increase in primary care coverage has provided access to health care and, consequently, increased the diagnosis of diabetes among those underprivileged (i.e., therefore, artificially increasing the diabetes inequality). The National Program for Improving Access and Quality in Primary Care and the Requalification Program for Basic Health Units (*Programa Nacional de Melhoria do Acesso e da Qualidade da Atenção Básica -PMAQ*), created in 2011, as well as the More Doctors for Brazil Project (*Mais Médicos para o Brasil*), created in 2013, increased the number of health units and physicians' access to more than 65 million people<sup>23</sup>. If that was the case, we would expect increase in social inequality for hypertension too<sup>24</sup>. Unless the requirement of fewer medical supplies for hypertension diagnosis compared to diabetes<sup>24</sup>

causes less underreport for hypertension and, therefore, benefits less from the extension in primary care coverage not affecting the inequality.

The increase in obesity prevalence over time, especially among the least educated group, have been reported in other countries<sup>25</sup>. This can be explained by the lower financial access to healthy food in addition to fewer opportunities to engage in leisure physical activities<sup>26</sup>. The gap in obesity prevalence between least and the most educated groups reduced over time, but it was not sufficient to impact SII indicator. However, due to an increase in obesity prevalence in all education groups, especially in those with 9 to 11 study years (53,1% while prevalence raised 33,3% in people with less than 4 years of study), relative inequality reduced. This reduction in relative inequality is an artificial change that should not be read as an achievement because does not reflect a beneficial change in inequality, but rather a worsening scenario for all strata of education. Brazil still lacks strong initiatives to protect the more vulnerable groups and tackle the social inequalities for obesity such as regulation of nutritional labelling claims and health warnings, advertising restrictions, protection of the food school environment and taxation of unhealthy food<sup>27</sup>, jointly with a broad promotion of active commuting and availability of public spaces for physical activity<sup>28</sup>.

Our results confirm the global decrease trend in smoking prevalence<sup>29</sup>, with a sharper reduction among the most educated adults<sup>30</sup>. This explained the increase in the relative educational inequality in most strata, except among men. Several actions have been taken to halt smoking, such as the ratification of the World Health Organization Framework Convention on Tobacco Control in 2005, which resulted in the Brazilian National Tobacco Control Policy<sup>31</sup>. These policies may have had less impact the least educated people<sup>32</sup>, increasing social inequality. Although actions, such as the taxation of tobacco products, immediately affect low-income individuals, over time they resort to the illegal market, maintaining the cigarette use. Recent work shows that, in Brazil, the illegal cigarette market grew from 28.6% in 2012 to

1  
2  
3  
4 42.8% in 2016<sup>33</sup>. Moreover, most actions aimed at changing behavior in favor of smoking  
5  
6 cessation are educational, requiring cognitive skills for better understanding and, thus, more  
7  
8 educated people will benefit more from these interventions<sup>34</sup>. In addition, tobacco companies  
9  
10 have intensified marketing strategies to reach vulnerable populations, such as women<sup>35</sup>, which  
11  
12 may also justify the higher inequality in this group.  
13  
14

15  
16 Educational inequality has disproportionately affected women and non-whites in  
17  
18 Brazil. Although women have had more schooling than men in Brazil, their average income has  
19  
20 been lower<sup>36</sup>. Illiteracy among women aged 15 years and over non-white was more than double  
21  
22 that of white women (10.2% and 4.9%, respectively). Although there was an improvement in  
23  
24 the education of the non-white adult population with 12 or more years of study between 1995  
25  
26 and 2015 (from 3.3 to 12%), this percentage among whites was more than two-fold higher in  
27  
28 2015 (25.9%)<sup>36</sup>. In Brazil, unlike other countries, social inequality drives racial disparities<sup>37</sup>.  
29  
30 Black people have less access to health care, less quality of health care and are less informed  
31  
32 about health promotion and disease prevention<sup>38</sup>.  
33  
34  
35

36  
37 We found punctual reduction in the disparities for obesity, and an increase in  
38  
39 disparities for diabetes and smoking, that are all modifiable risk factors sensitive to strategies  
40  
41 promoting health lifestyle<sup>39</sup>. Accordingly, policies targeting the vulnerable groups, such as  
42  
43 income redistribution<sup>40</sup>, a strong and broad social security system and health education and  
44  
45 promotion, would avoid the reinforcement of the current inequalities<sup>8</sup> and bring better health  
46  
47 outcomes for Brazilians. In the last decades, Brazil has adopted several policies that could  
48  
49 mitigate socioeconomic inequalities, with the potential to alter the prevalence of risk factors for  
50  
51 NCDs, such as the expansion of primary health care, through the Family Health Strategy, and  
52  
53 conditional cash transfer, through Bolsa Família Program. These policies increased the access  
54  
55 of the low-income population to health promotion and disease prevention actions <sup>41</sup> <sup>42</sup>.  
56  
57  
58  
59 Launched in 2011 by the Minister of Health of Brazil, the Strategic Action Plan for Tackling  
60

Chronic Non-Communicable Diseases in Brazil has made advances in surveillance (eg. national surveys and monitoring of mortality and risk factor reduction targets); health promotion (eg. encouragement of physical activity, adequate nutrition and health promotion through the creation of the Health Gym Program); regulation (eg. legislation on tobacco-free environments); and health care (eg. free of charge drugs for hypertension, diabetes, and asthma; organization of the emergency service network for cardiovascular diseases)<sup>43</sup>. More recently, a new plan for Tackling NCD in Brazil from 2021 to 2030 has been launched by the Minister of Health of Brazil, and it is guided to prevent NCD, promote health, while reducing health inequalities<sup>44</sup>. Despite efforts, limited advances have been achieved. Health inequality is a persistent phenomenon<sup>45</sup>. Moreover, since 2014, Brazil has been facing an economic crisis and recently adopted austerity policies that could negatively impact health inequality trends<sup>46</sup>.

Our results may serve as a starting point for new studies that can deepen into the causes that led to the reductions in educational inequalities observed for hypertension and obesity. Future studies also need to understand the reasons for an increase in educational inequality for diabetes and smoking.

Our study has some limitations. VIGITEL survey collected data only from the population with landlines and included only the adults living in Brazilian capitals and the federal district. Despite using weighting measures for the general population, we would expect some small differences in the prevalence of our outcomes if we had assessed a sample that was not limited by landline access<sup>11</sup>. Over time, the access to landlines has reduced, and older and wealthier households are more likely to have and retain a landline in addition to a mobile phone. Therefore, the set of those contacted in a landline-only survey will increasingly skew towards those older/ wealthier groups. This may have underestimated the prevalence of NCD in those places with less landlines access<sup>47</sup>. Future studies need to assess social inequality for NCD in rural areas<sup>8</sup>. In addition, risk factors were self-reported and may be underestimated, especially

1  
2  
3  
4 medical diagnosis of diabetes and hypertension. This may have affected our results  
5  
6 underestimating inequality in hypertension and diabetes, as it may have underestimated the  
7  
8 prevalence among the least favored groups.  
9

10  
11 In conclusion, we observed maintenance in the educational gap for hypertension and  
12  
13 decreased relative inequity in general obesity and among female and non-whites. The reduction  
14  
15 in inequality for obesity should be read with caution because it reflects increases in obesity  
16  
17 prevalence in all groups. The absolute educational inequality increased for diabetes in all strata  
18  
19 and increased in absolute and relative forms for smoking in almost all strata.  
20  
21  
22  
23  
24

## 25 **CONTRIBUTION STATEMENT**

26  
27  
28 P.T.D. contributed to data analysis and interpretation and to drafting and revising the  
29  
30 manuscript and figures. C.M.A., L.S.S., A.E.M.R. L.F.M.R. and E.S.M. contributed to study  
31  
32 concept and design, data interpretation, revising the manuscript and figures, and final approval  
33  
34 of the version submitted.  
35  
36  
37  
38  
39  
40  
41

## 42 **COMPETING INTERESTS**

43  
44 The authors declare no competing interests.  
45  
46  
47  
48

## 49 **FUNDING**

50  
51  
52  
53 This research received financial support from the Brazilian National Council of Scientific and  
54  
55 Technological Development (CNPq), 404905/2016-1, awarded to Catarina Machado Azeredo.  
56  
57 The study sponsor was not involved in the study's design; the collection, analysis, and  
58  
59 interpretation of data; writing the report; or the decision to submit the report for publication.  
60



## DATA SHARING STATEMENT

All datasets of VIGITEL are publicly available at: <http://svs.aids.gov.br/download/Vigitel/>

## REFERENCE

1. Malta DC, Andrade S, Oliveira TP, et al. Probability of premature death for chronic non-communicable diseases, Brazil and Regions, projections to 2025. *Rev Bras Epidemiol* 2019;22:e190030. doi: 10.1590/1980-549720190030 [published Online First: 2019/04/04]
2. Global, regional, and national age-sex specific mortality for 264 causes of death, 1980-2016: a systematic analysis for the Global Burden of Disease Study 2016. *Lancet* 2017;390(10100):1151-210. doi: 10.1016/s0140-6736(17)32152-9 [published Online First: 2017/09/19]
3. Collaborators GBDRF. Global, regional, and national comparative risk assessment of 84 behavioural, environmental and occupational, and metabolic risks or clusters of risks for 195 countries and territories, 1990-2017: a systematic analysis for the Global Burden of Disease Study 2017. *Lancet* 2018;392(10159):1923-94. doi: 10.1016/S0140-6736(18)32225-6 [published Online First: 2018/11/30]
4. Zhao D, Post WS, Blasco-Colmenares E, et al. Racial Differences in Sudden Cardiac Death. *Circulation* 2019;139(14):1688-97. doi: 10.1161/CIRCULATIONAHA.118.036553 [published Online First: 2019/02/05]
5. Beltran-Sanchez H, Andrade FC. Time trends in adult chronic disease inequalities by education in Brazil: 1998-2013. *Int J Equity Health* 2016;15(1):139. doi: 10.1186/s12939-016-0426-5 [published Online First: 2016/11/18]
6. Strong K, Mathers C, Leeder S, et al. Preventing chronic diseases: how many lives can we save? *Lancet* 2005;366(9496):1578-82. doi: 10.1016/s0140-6736(05)67341-2 [published Online First: 2005/11/01]
7. Nugent R, Bertram MY, Jan S, et al. Investing in non-communicable disease prevention and management to advance the Sustainable Development Goals. *Lancet* 2018;391(10134):2029-35. doi: 10.1016/s0140-6736(18)30667-6 [published Online First: 2018/04/09]
8. Niessen LW, Mohan D, Akuoku JK, et al. Tackling socioeconomic inequalities and non-communicable diseases in low-income and middle-income countries under the Sustainable Development agenda. *Lancet* 2018;391(10134):2036-46. doi: 10.1016/S0140-6736(18)30482-3 [published Online First: 2018/04/09]
9. de Azevedo Barros MB, Lima MG, Medina LP, et al. Social inequalities in health behaviors among Brazilian adults: National Health Survey, 2013. *Int J Equity Health* 2016;15(1):148. doi: 10.1186/s12939-016-0439-0 [published Online First: 2016/11/18]
10. Brasil. Vigitel Brasil 2018: vigilância de fatores de risco e proteção para doenças crônicas nas capitais dos 26 estados brasileiros e o Distrito Federal em 2018. In: transmissíveis DdAeSeVdDn, ed. Brasília: Ministério da Saúde, 2019:132.

11. Bernal RTI, Malta DC, Claro RM, et al. Effect of the inclusion of mobile phone interviews to Vigitel. *Rev Saude Publica* 2017;51(suppl 1):15s. doi: 10.1590/s1518-8787.2017051000171 [published Online First: 2017/06/08]
12. Knäuper B, Carrière K, Chamandy M, et al. How aging affects self-reports. *Eur J Ageing* 2016;13:185–93.
13. WHO. Obesity: preventing and managing the global epidemic. Report of a WHO Consultation. In: Series WTR, ed. Geneva: WHO, World Health Organization, 2000.
14. WHO. Handbook on health inequality monitoring: with a special focus on low- and middle-income countries. Geneva: WHO press, 2013:105.
15. Barros AJ, Victora CG. Measuring coverage in MNCH: determining and interpreting inequalities in coverage of maternal, newborn, and child health interventions. *PLoS Med* 2013;10(5):e1001390. doi: 10.1371/journal.pmed.1001390 [published Online First: 2013/05/15]
16. Silva I, Restrepo-Mendez MC, Costa JC, et al. Measurement of social inequalities in health: concepts and methodological approaches in the Brazilian context. *Epidemiol Serv Saude* 2018;27(1):e000100017. doi: 10.5123/S1679-49742018000100017 [published Online First: 2018/03/08]
17. Antunes JLF, Cardoso MRA. Uso da análise de séries temporais em estudos epidemiológicos. *Epidemiologia e Serviços de Saúde* 2015;24:565-76.
18. Malta DC, Bernal RTI, Andrade S, et al. Prevalence of and factors associated with self-reported high blood pressure in Brazilian adults. *Rev Saude Publica* 2017;51(suppl 1):11s. doi: 10.1590/S1518-8787.2017051000006 [published Online First: 2017/06/08]
19. Fan AZ, Strasser SM, Zhang X, et al. State socioeconomic indicators and self-reported hypertension among US adults, 2011 behavioral risk factor surveillance system. *Prev Chronic Dis* 2015;12:E27. doi: 10.5888/pcd12.140353 [published Online First: 2015/02/27]
20. Brasil. Política Nacional de Saúde Integral da População Negra: uma política do SUS. In: Saúde Md, ed. Brasília, 2017:44.
21. Guh DP, Zhang W, Bansback N, et al. The incidence of co-morbidities related to obesity and overweight: A systematic review and meta-analysis. *BMC Public Health* 2009;9(1):88. doi: 10.1186/1471-2458-9-88
22. Lanás F, Seron P. Diverging trends in obesity, diabetes, and raised blood pressure in the Americas. *The Lancet Global Health* 2020;8(1):e18-e19. doi: 10.1016/S2214-109X(19)30503-0
23. Facchini LA, Tomasi E, Dilélio AS. Qualidade da Atenção Primária à Saúde no Brasil: avanços, desafios e perspectivas. *Saúde em Debate* 2018;42:208-23.
24. Brasil. Cadernos de atenção básica n.35. Estratégias para o cuidado da pessoa com doença crônica. In: Saúde Md, ed. Brasília: Ministério da Saúde, 2014:162.
25. Hulsegge G, Picavet HS, Blokstra A, et al. Today's adult generations are less healthy than their predecessors: generation shifts in metabolic risk factors: the Doetinchem Cohort Study. *Eur J Prev Cardiol* 2014;21(9):1134-44. doi: 10.1177/2047487313485512 [published Online First: 2013/04/12]
26. Malta DC, Santos MAS, Andrade SSCdA, et al. Tendência temporal dos indicadores de excesso de peso em adultos nas capitais brasileiras, 2006-2013. *Ciência & Saúde Coletiva* 2016;21:1061-69.

27. Huang TT, Cawley JH, Ashe M, et al. Mobilisation of public support for policy actions to prevent obesity. *Lancet* 2015;385(9985):2422-31. doi: 10.1016/s0140-6736(14)61743-8 [published Online First: 2015/02/24]
28. Malta DC, Barbosa da Silva J. Políticas to promote physical activity in Brazil. *Lancet* 2012;380(9838):195-6. doi: 10.1016/s0140-6736(12)61041-1 [published Online First: 2012/07/24]
29. Bruthans J, Mayer O, Jr., De Bacquer D, et al. Educational level and risk profile and risk control in patients with coronary heart disease. *Eur J Prev Cardiol* 2016;23(8):881-90. doi: 10.1177/2047487315601078 [published Online First: 2015/08/19]
30. Eliasson M, Eriksson M, Lundqvist R, et al. Comparison of trends in cardiovascular risk factors between two regions with and without a community and primary care prevention programme. *Eur J Prev Cardiol* 2018;25(16):1765-72. doi: 10.1177/2047487318778349 [published Online First: 2018/05/31]
31. Cavalcante TM, Pinho MCMd, Perez CdA, et al. Brasil: balanço da Política Nacional de Controle do Tabaco na última década e dilemas. *Cadernos de Saúde Pública* 2017;33
32. Bazotti A, Finokiet M, Conti IL, et al. Tabagismo e pobreza no Brasil: uma análise do perfil da população tabagista a partir da POF 2008-2009. *Ciência & Saúde Coletiva* 2016;21:45-52.
33. Szklo A, Iglesias RM, Carvalho de Souza M, et al. Trends in Illicit Cigarette Use in Brazil Estimated From Legal Sales, 2012-2016. *Am J Public Health* 2018;108(2):265-69. doi: 10.2105/ajph.2017.304117 [published Online First: 2017/12/22]
34. Silva STd, Martins MC, Faria FRd, et al. Combate ao Tabagismo no Brasil: a importância estratégica das ações governamentais. *Ciência & Saúde Coletiva* 2014;19:539-52.
35. Doku D. The tobacco industry tactics-a challenge for tobacco control in low and middle income countries. *Afr Health Sci* 2010;10(2):201-3. [published Online First: 2011/02/18]
36. IPEA. Retrato das Desigualdades de Gênero e Raça-1995 a 2015 4ed. Brasília: IPEA, 2011:39.
37. Victora C. Socioeconomic inequalities in Health: Reflections on the academic production from Brazil. *Int J Equity Health* 2016;15(1):164. doi: 10.1186/s12939-016-0456-z [published Online First: 2016/11/18]
38. IFMSA. IFMSA Policy Document Ethnicity and Health. Montreal, Canada: IFMSA, 2018.
39. Piepoli MF, Hoes AW, Agewall S, et al. 2016 European Guidelines on cardiovascular disease prevention in clinical practice: The Sixth Joint Task Force of the European Society of Cardiology and Other Societies on Cardiovascular Disease Prevention in Clinical Practice (constituted by representatives of 10 societies and by invited experts)Developed with the special contribution of the European Association for Cardiovascular Prevention & Rehabilitation (EACPR). *Eur Heart J* 2016;37(29):2315-81. doi: 10.1093/eurheartj/ehw106 [published Online First: 2016/05/26]
40. Xie X, Wu Q, Hao Y, et al. Identifying determinants of socioeconomic inequality in health service utilization among patients with chronic non-communicable diseases in China. *PLoS One* 2014;9(6):e100231. doi: 10.1371/journal.pone.0100231 [published Online First: 2014/06/25]
41. de Sousa MF. [The Family Health Program in Brazil: analysis of access to basic care]. *Rev Bras Enferm* 2008;61(2):153-8. doi: 10.1590/s0034-71672008000200002 [published Online First: 2008/06/25]
42. Santos LMP, Costa AM, Girardi SN. Programa Mais Médicos: uma ação efetiva para reduzir iniquidades em saúde. *Ciência & Saúde Coletiva* 2015;20:3547-52.

- 1  
2  
3  
4  
5  
6  
7  
8  
9  
10  
11  
12  
13  
14  
15  
16  
17  
18  
19  
20  
21  
22  
23  
24  
25  
26  
27  
28  
29  
30  
31  
32  
33  
34  
35  
36  
37  
38  
39  
40  
41  
42  
43  
44  
45  
46  
47  
48  
49  
50  
51  
52  
53  
54  
55  
56  
57  
58  
59  
60
43. Malta DC, Oliveira TP, Santos MAS, et al. Avanços do Plano de Ações Estratégicas para o Enfrentamento das Doenças Crônicas não Transmissíveis no Brasil, 2011-2015. . *Epidemiol Serv Saúde* 2016;25
  44. Brasil. Plano de ações estratégicas para o enfrentamento das doenças crônicas e agravos não transmissíveis no Brasil 2021-2030. In: SAÚDE MD, SAÚDE SDVE, DOENÇAS DDAESEVD, et al., eds. Brasília, DF: Ministério da Saúde, 2020:122.
  45. Mackenbach JP, Valverde JR, Artnik B, et al. Trends in health inequalities in 27 European countries. *Proc Natl Acad Sci U S A* 2018;115(25):6440-45. doi: 10.1073/pnas.1800028115 [published Online First: 2018/06/06]
  46. Oreiro JL. A grande recessão brasileira: diagnóstico e uma agenda de política econômica. *Estudos Avançados* 2017;31:75-88.
  47. Bernal RTI, Malta DC, de Araújo TS, et al. Inquérito por telefone: pesos de pós-estratificação para corrigir vícios de baixa cobertura em Rio Branco, AC. . *Rev Saúde Pública* 2013;47(2):316-25

**Table 1: Sociodemographic characteristics and risk factor prevalence, according to survey year of VIGITEL (2007-2018).**

| Characteristics               | Survey year and Standard Error |            |            |            |            |            |            |            |            |            |            |            | p value |
|-------------------------------|--------------------------------|------------|------------|------------|------------|------------|------------|------------|------------|------------|------------|------------|---------|
|                               | 2007                           | 2008       | 2009       | 2010       | 2011       | 2012       | 2013       | 2014       | 2015       | 2016       | 2017       | 2018       |         |
| Individuals (n)               | 54,271                         | 52,641     | 52,726     | 52,628     | 51,656     | 40,374     | 45,889     | 34,991     | 49,919     | 46,488     | 48,931     | 48,463     | -       |
| Mean age (years)              | 39.8 ± 0.1                     | 39.9 ± 0.1 | 40.2 ± 0.1 | 40.3 ± 0.1 | 40.4 ± 0.1 | 40.1 ± 0.1 | 40.2 ± 0.1 | 40.2 ± 0.2 | 40.9 ± 0.1 | 40.7 ± 0.1 | 41.4 ± 0.1 | 41.7 ± 0.1 | 0.001   |
| Education (years)             | 9.4 ± 0.0                      | 9.4 ± 0.0  | 9.6 ± 0.0  | 9.8 ± 0.0  | 9.9 ± 0.0  | 10.3 ± 0.0 | 10.4 ± 0.0 | 10.6 ± 0.1 | 10.5 ± 0.0 | 10.8 ± 0.0 | 10.6 ± 0.0 | 10.7 ± 0.0 | <0.001  |
| Sex (%)                       |                                |            |            |            |            |            |            |            |            |            |            |            |         |
| Female                        | 53.2 ± 0.4                     | 53.3 ± 0.4 | 53.3 ± 0.5 | 53.2 ± 0.5 | 53.2 ± 0.4 | 53.3 ± 0.5 | 53.4 ± 0.5 | 53.4 ± 0.6 | 53.1 ± 0.5 | 53.3 ± 0.5 | 53.3 ± 0.5 | 53.2 ± 0.5 | 0.858   |
| Male                          | 46.8 ± 0.4                     | 46.7 ± 0.4 | 46.7 ± 0.5 | 46.8 ± 0.5 | 46.8 ± 0.4 | 46.7 ± 0.5 | 46.6 ± 0.5 | 46.6 ± 0.6 | 46.9 ± 0.5 | 46.7 ± 0.5 | 46.7 ± 0.5 | 46.8 ± 0.5 | 0.858   |
| Skin color (%)                |                                |            |            |            |            |            |            |            |            |            |            |            |         |
| White                         | 40.8 ± 0.4                     | 39.0 ± 0.4 | 39.1 ± 0.4 | 39.8 ± 0.5 | 43.9 ± 0.4 | 43.5 ± 0.5 | 45.0 ± 0.5 | 43.6 ± 0.5 | 41.2 ± 0.5 | 46.2 ± 0.5 | 42.1 ± 0.5 | 41.4 ± 0.5 | 0.154   |
| Non-white                     | 59.2 ± 0.4                     | 61.0 ± 0.4 | 60.9 ± 0.4 | 60.2 ± 0.5 | 56.1 ± 0.4 | 56.5 ± 0.5 | 55.0 ± 0.5 | 56.4 ± 0.5 | 58.8 ± 0.5 | 53.8 ± 0.5 | 57.9 ± 0.5 | 58.6 ± 0.5 | 0.154   |
| Risk factors (%) <sup>+</sup> |                                |            |            |            |            |            |            |            |            |            |            |            |         |
| Hypertension                  | 34.1 ± 0.3                     | 35.5 ± 0.3 | 35.4 ± 0.3 | 35.6 ± 0.3 | 34.9 ± 0.3 | 33.6 ± 0.3 | 33.1 ± 0.3 | 33.8 ± 0.3 | 33.7 ± 0.2 | 33.6 ± 0.2 | 33.2 ± 0.2 | 33.3 ± 0.2 | 0.065   |
| Diabetes                      | 8.9 ± 0.2                      | 9.3 ± 0.2  | 10.0 ± 0.2 | 10.3 ± 0.2 | 10.2 ± 0.2 | 9.9 ± 0.2  | 9.5 ± 0.2  | 10.9 ± 0.2 | 10.2 ± 0.2 | 12.0 ± 0.2 | 10.4 ± 0.2 | 10.6 ± 0.2 | 0.004   |
| Smoking                       | 13.0 ± 0.2                     | 12.3 ± 0.2 | 11.9 ± 0.2 | 11.2 ± 0.2 | 11.0 ± 0.2 | 10.0 ± 0.2 | 8.8 ± 0.2  | 8.7 ± 0.2  | 8.1 ± 0.1  | 7.9 ± 0.1  | 7.6 ± 0.1  | 7.4 ± 0.1  | <0.001  |
| Obesity                       | 14.7 ± 0.2                     | 15.5 ± 0.2 | 15.9 ± 0.2 | 16.8 ± 0.2 | 17.7 ± 0.2 | 18.2 ± 0.2 | 18.1 ± 0.2 | 18.8 ± 0.2 | 19.0 ± 0.2 | 19.1 ± 0.2 | 19.1 ± 0.2 | 20.0 ± 0.2 | <0.001  |

<sup>+</sup> Age standardized according to 2018 age distribution.

**Table 2:** Age standardized Slope Index of Inequality (SII) and Concentration Index (CIX) in hypertension, diabetes, smoking and obesity.

| Risk factor  | SII (95% CI)         |                      | CIX (95% CI)         |                      |
|--------------|----------------------|----------------------|----------------------|----------------------|
|              | 2007                 | 2018                 | 2007                 | 2018                 |
| Hypertension | -36.8 (-38.8; -34.9) | -37.8 (-39.3; -36.2) | -15.9 (-16.9; -14.9) | -16.0 (-16.8; -15.2) |
| Female       | -44.5 (-46.9; -42.0) | -44.1 (-45.9; -42.2) | -18.3 (-19.5; -17.1) | -18.2 (-19.2; -17.3) |
| Male         | -20.2 (-23.3; -17.0) | -23.5 (-26.0; -21.0) | -9.2 (-11.0; -7.5)   | -9.9 (-11.4; -8.4)   |
| White        | -33.5 (-36.6; -30.4) | -35.5 (-37.8; -33.2) | -14.3 (-15.9; -12.7) | -14.3 (-15.6; -13.0) |
| Non-white    | -39.6 (-42.1; -37.1) | -40.3 (-42.3; -38.3) | -17.0 (-18.2; -15.7) | -17.5 (-18.6; -16.4) |
| Diabetes     | -12.8 (-14.3; -11.3) | -17.7 (-18.9; -16.5) | -20.3 (-22.8; -17.9) | -24.0 (-25.7; -22.3) |
| Female       | -15.9 (-17.9; -13.9) | -19.9 (-21.5; -18.4) | -24.6 (-27.5; -21.7) | -26.9 (-29.0; -24.8) |
| Male         | -6.8 (-8.9; -4.6)    | -13.4 (-15.3; -11.6) | -10.8 (-15.0; -6.7)  | -17.7 (-20.6; -14.9) |
| White        | -11.1 (-13.4; -8.9)  | -15.7 (-17.5; -14.0) | -19.0 (-22.8; -15.1) | -21.1 (-23.7; -18.4) |
| Non-white    | -14.0 (-16.1; -12.0) | -19.7 (-21.3; -18.1) | -21.2 (-24.3; -18.1) | -26.4 (-28.6; -24.2) |
| Smoking      | -2.7 (-4.1; -1.3)    | -6.4 (-7.4; -5.4)    | -3.5 (-5.3; -1.8)    | -12.1 (-14.2; -10.0) |
| Female       | -1.3 (-2.9; 0.4)     | -6.2 (-7.4; -5.1)    | -2.0 (-4.4; 0.4)     | -14.4 (-17.4; -11.5) |
| Male         | -7.2 (-9.7; -4.8)    | -7.6 (-9.3; -5.9)    | -7.1 (-9.5; -4.7)    | -10.4 (-13.4; -7.5)  |
| White        | -0.4 (-2.6; 1.7)     | -4.3 (-5.8; -2.8)    | -1.0 (-3.7; 1.7)     | -6.6 (-9.7; -3.5)    |
| Non-white    | -4.4 (-6.2; -2.6)    | -8.7 (-10.0; -7.4)   | -5.4 (-7.6; -3.2)    | -18.2 (-20.9; -15.4) |
| Obesity      | -10.8 (-12.4; -9.2)  | -12.2 (-13.6; -10.7) | -11.3 (-13.0; -9.6)  | -8.6 (-9.8; -7.4)    |
| Female       | -16.6 (-18.7; -14.5) | -18.0 (-19.8; -16.2) | -17.4 (-19.5; -15.2) | -12.9 (-14.4; -11.5) |

21

|           |                     |                      |                     |                    |
|-----------|---------------------|----------------------|---------------------|--------------------|
| Male      | -0.4 (-2.7; 1.9)    | -0.8 (-3.1; 1.5)     | -0.5 (-3.0; 2.0)    | -0.2 (-2.0; 1.7)   |
| White     | -9.7 (-12.1; -7.3)  | -11.9 (-14.0; -9.8)  | -11.0 (-13.7; -8.2) | -8.4 (-10.3; -6.6) |
| Non-white | -11.2 (-13.3; -9.1) | -11.9 (-13.8; -10.0) | -10.9 (-13.0; -8.8) | -8.1 (-9.6; -6.6)  |

---

1  
2  
3  
4 **Figure 1:** Age-standardized prevalence of hypertension, diabetes, smoking and obesity by years of education and survey year from 2007 to 2018.  
5 VIGITEL, 2007-2018.  
6  
7

8 **Figure 2:** Trends in total slope index of inequality (SII) and concentration index (CIX) for age-standardized prevalence of hypertension, diabetes,  
9 smoking and obesity, VIGITEL 2007-2018.  
10

11 **c: annual change of index; p= p-value.**  
12  
13

14 **Figure 3:** Trends in slope index of inequality (SII) and concentration index (CIX) for age-standardized prevalence of hypertension,  
15 diabetes, smoking and obesity by sex, VIGITEL 2007-2018.  
16  
17

18 **c: annual change of index; p= p-value.**  
19  
20

21 **Figure 4:** Trends in slope index of inequality (SII) and concentration index (CIX) for age-standardized prevalence of hypertension,  
22 diabetes, smoking and obesity by skin color, VIGITEL 2007-2018.  
23  
24

25 **c: annual change of index; p= p-value.**  
26  
27  
28  
29  
30  
31  
32  
33  
34  
35  
36  
37  
38  
39  
40  
41  
42  
43  
44  
45  
46



1  
2  
3  
4  
5  
6  
7  
8  
9  
10  
11  
12  
13  
14  
15  
16  
17  
18  
19  
20  
21  
22  
23  
24  
25  
26  
27  
28  
29  
30  
31  
32  
33  
34  
35  
36  
37  
38  
39  
40  
41  
42  
43  
44  
45  
46  
47  
48  
49  
50  
51  
52  
53  
54  
55  
56  
57  
58  
59  
60

# Hypertension

# Diabetes

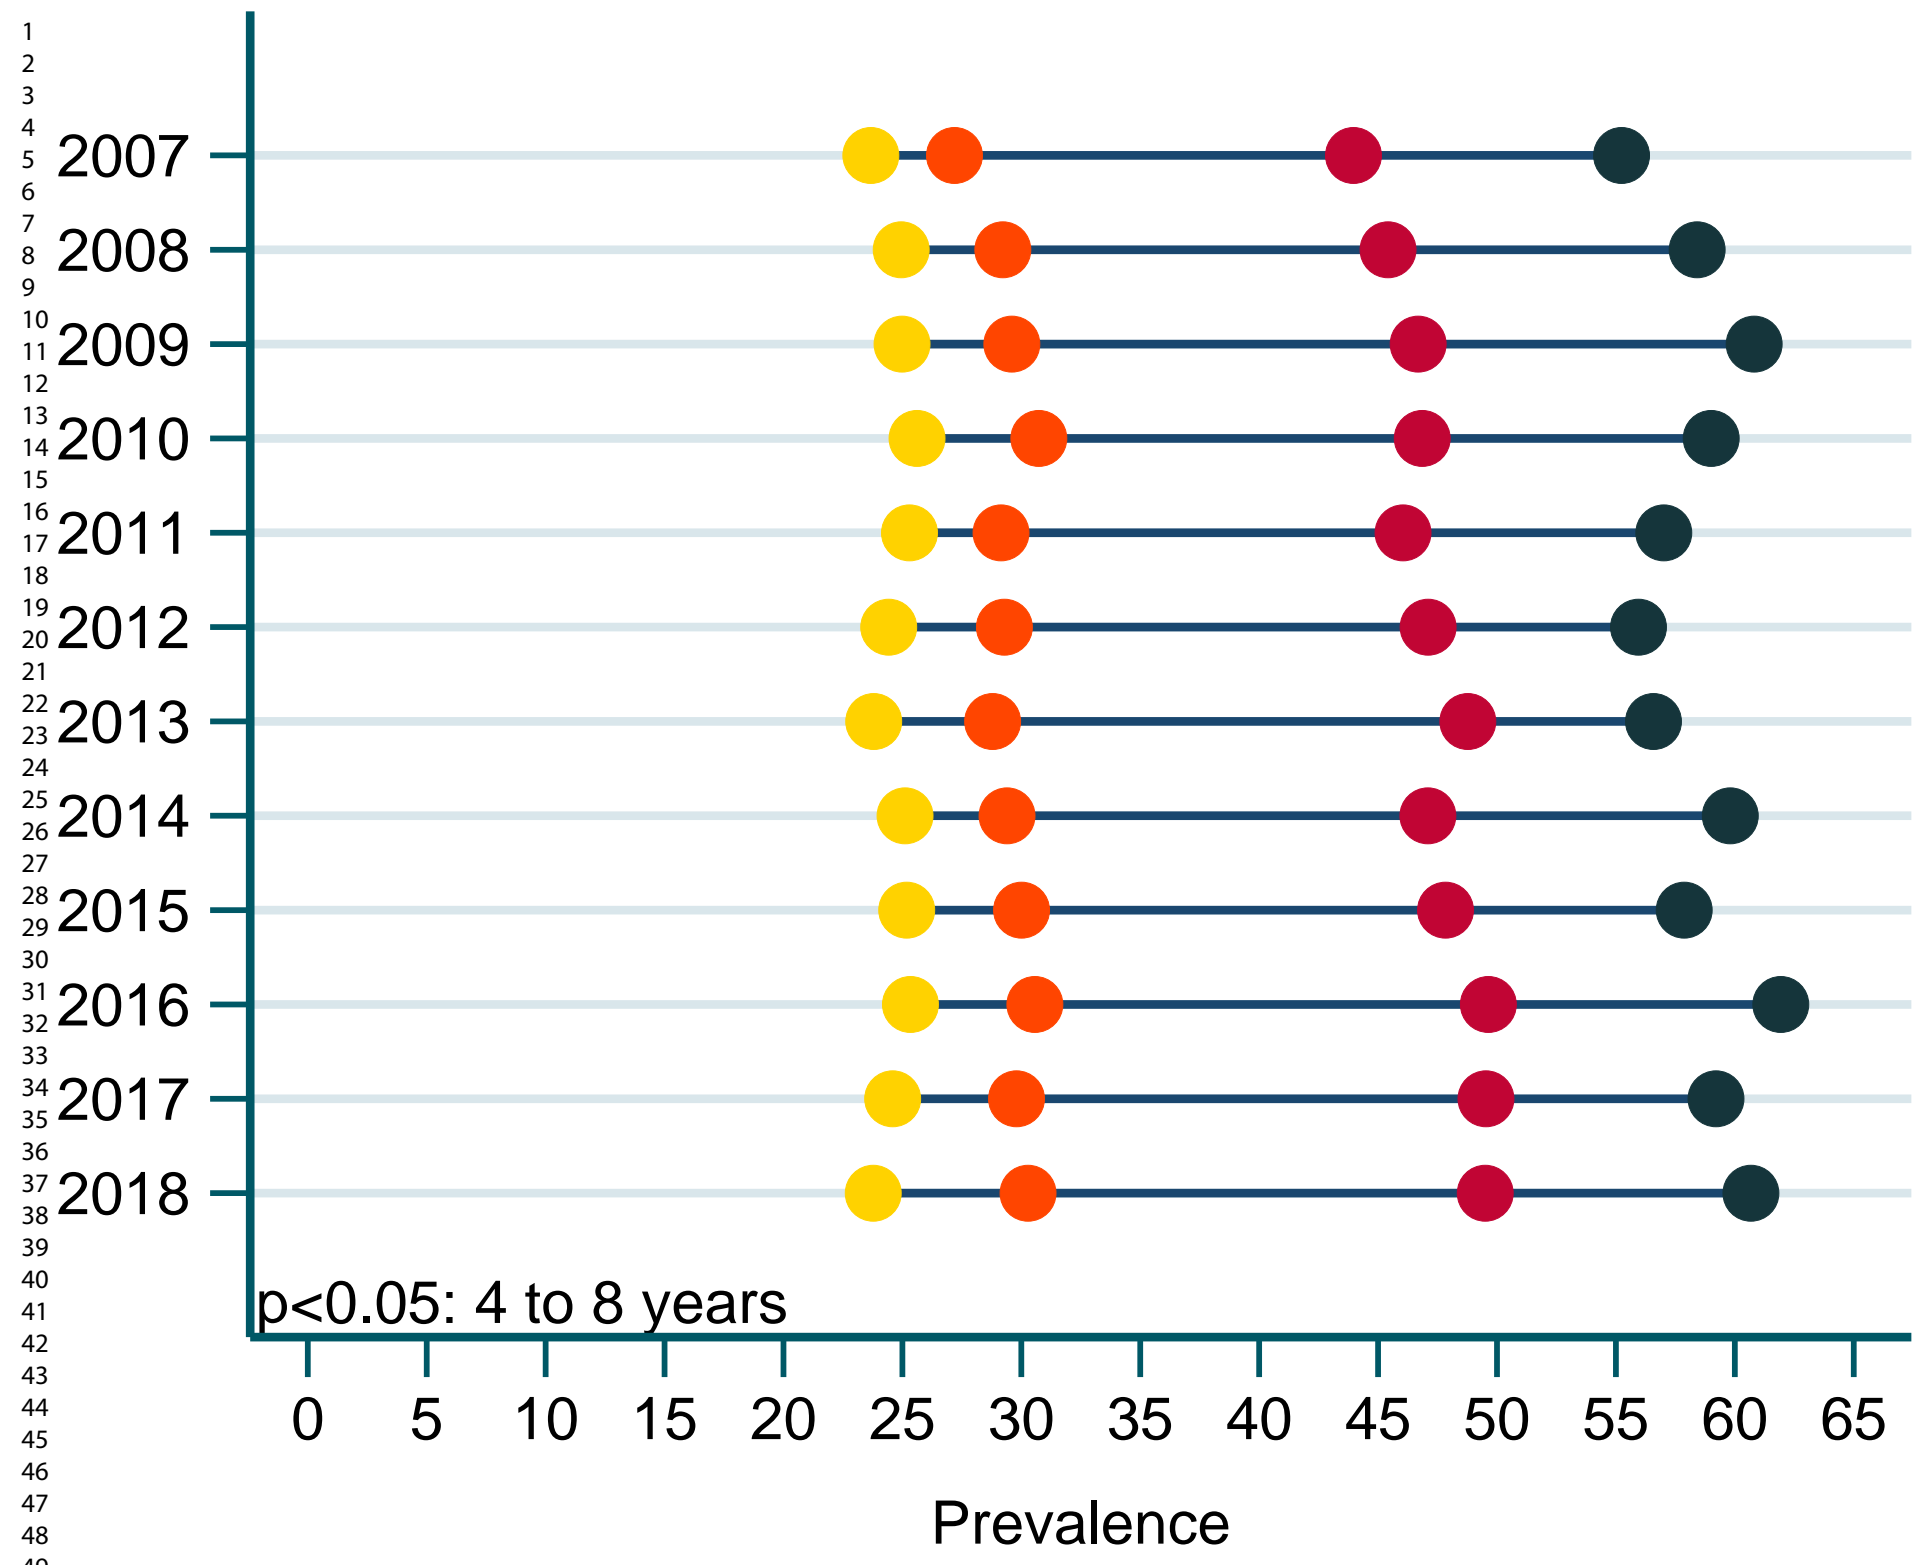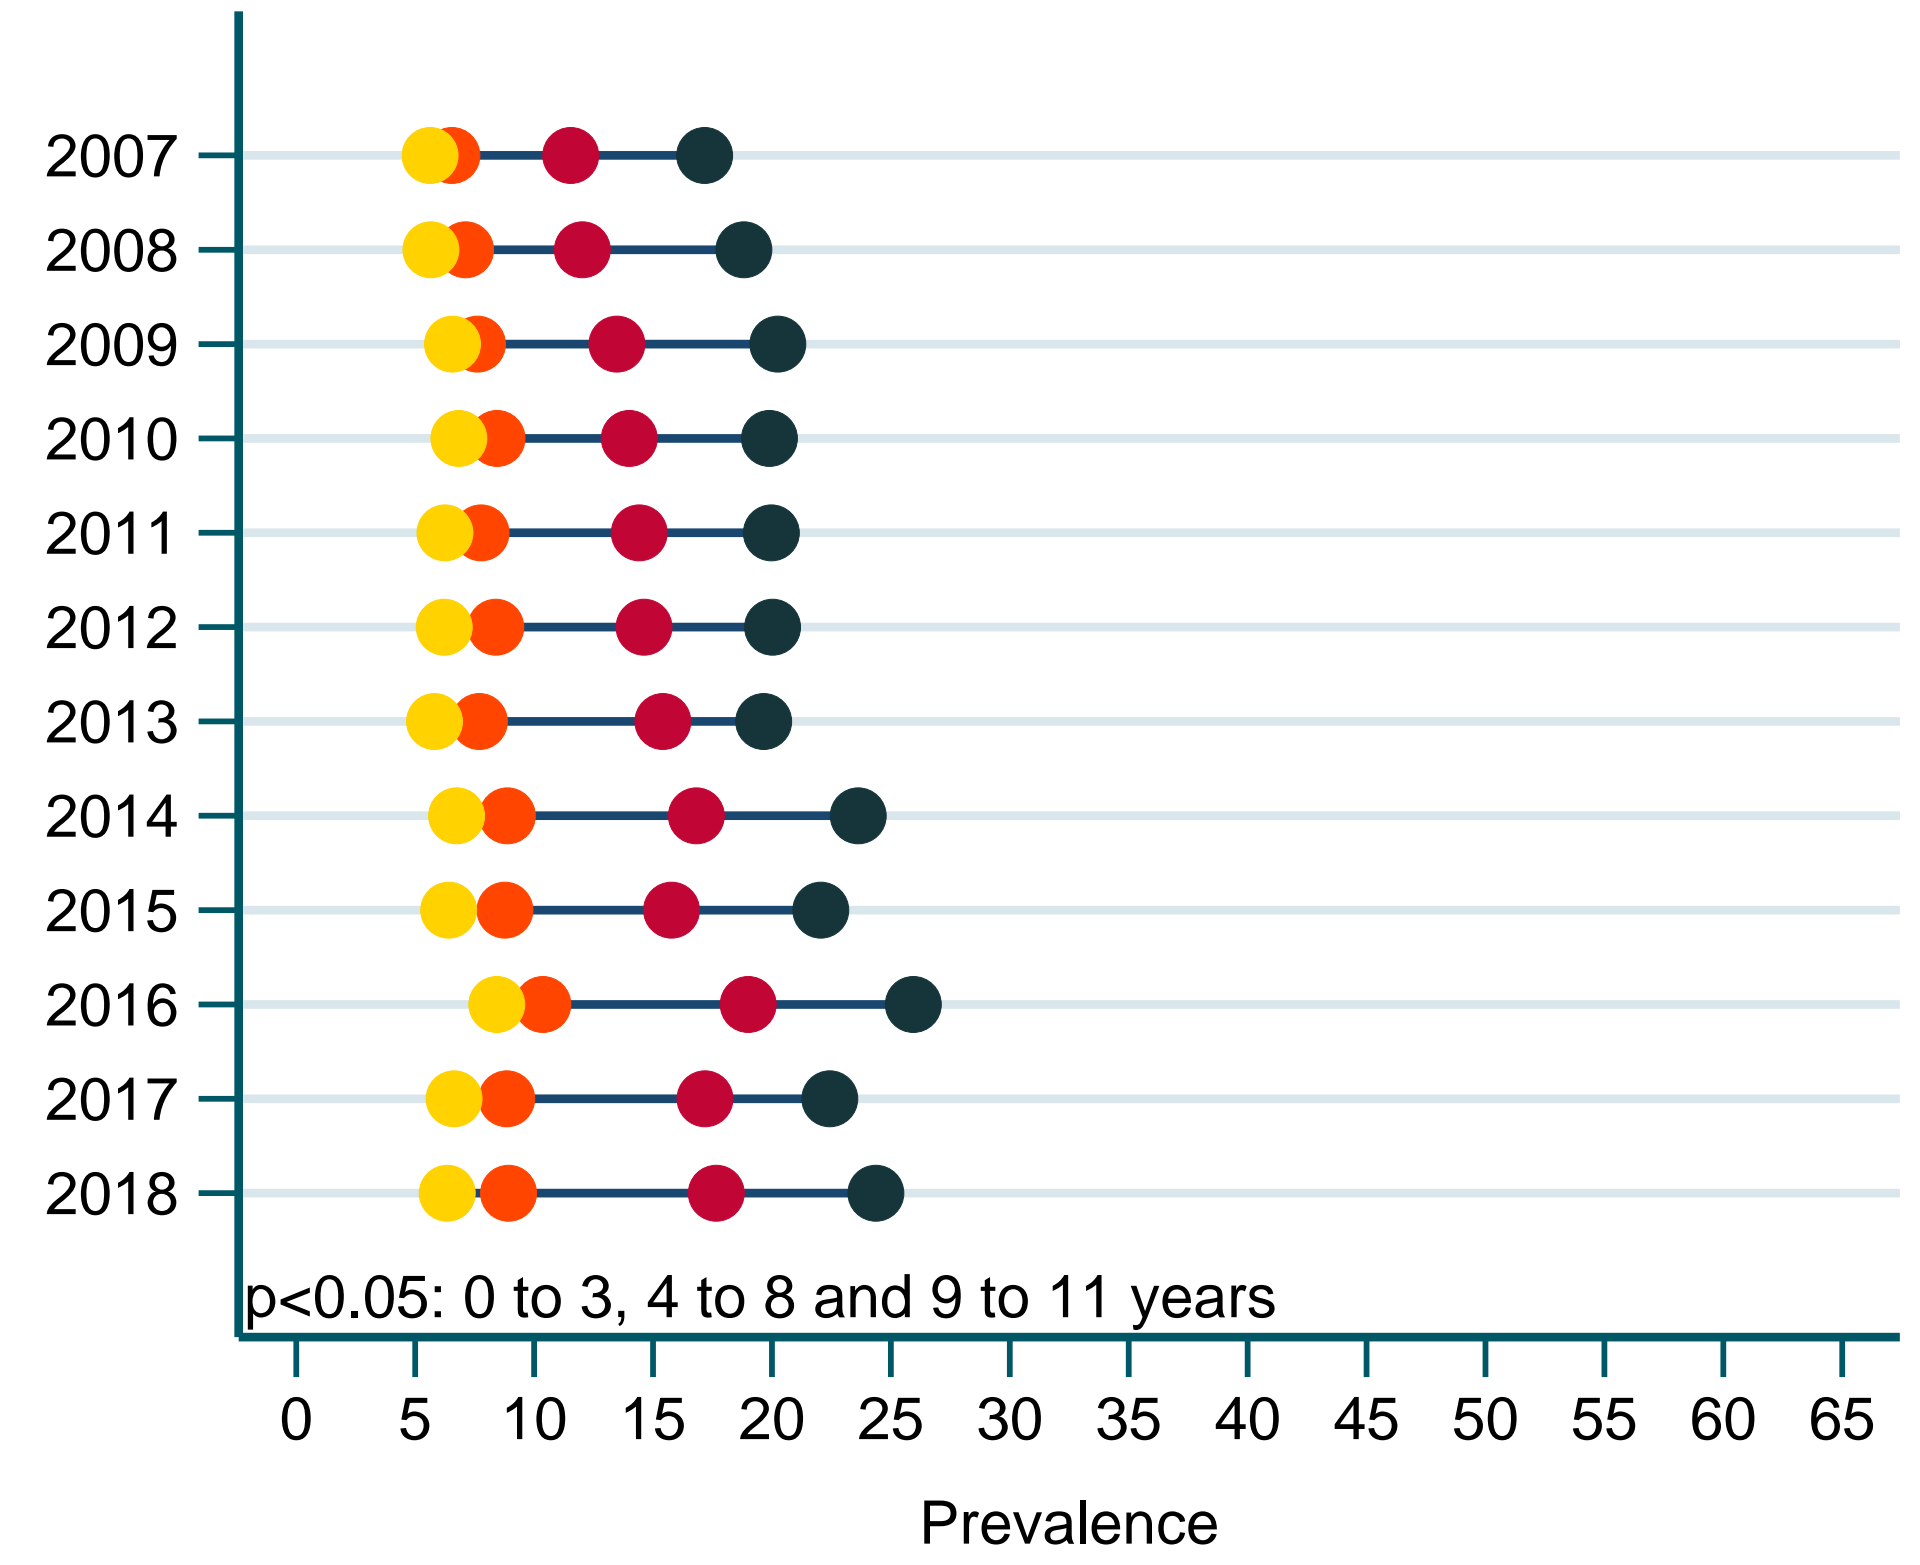

# Smoking

# Obesity

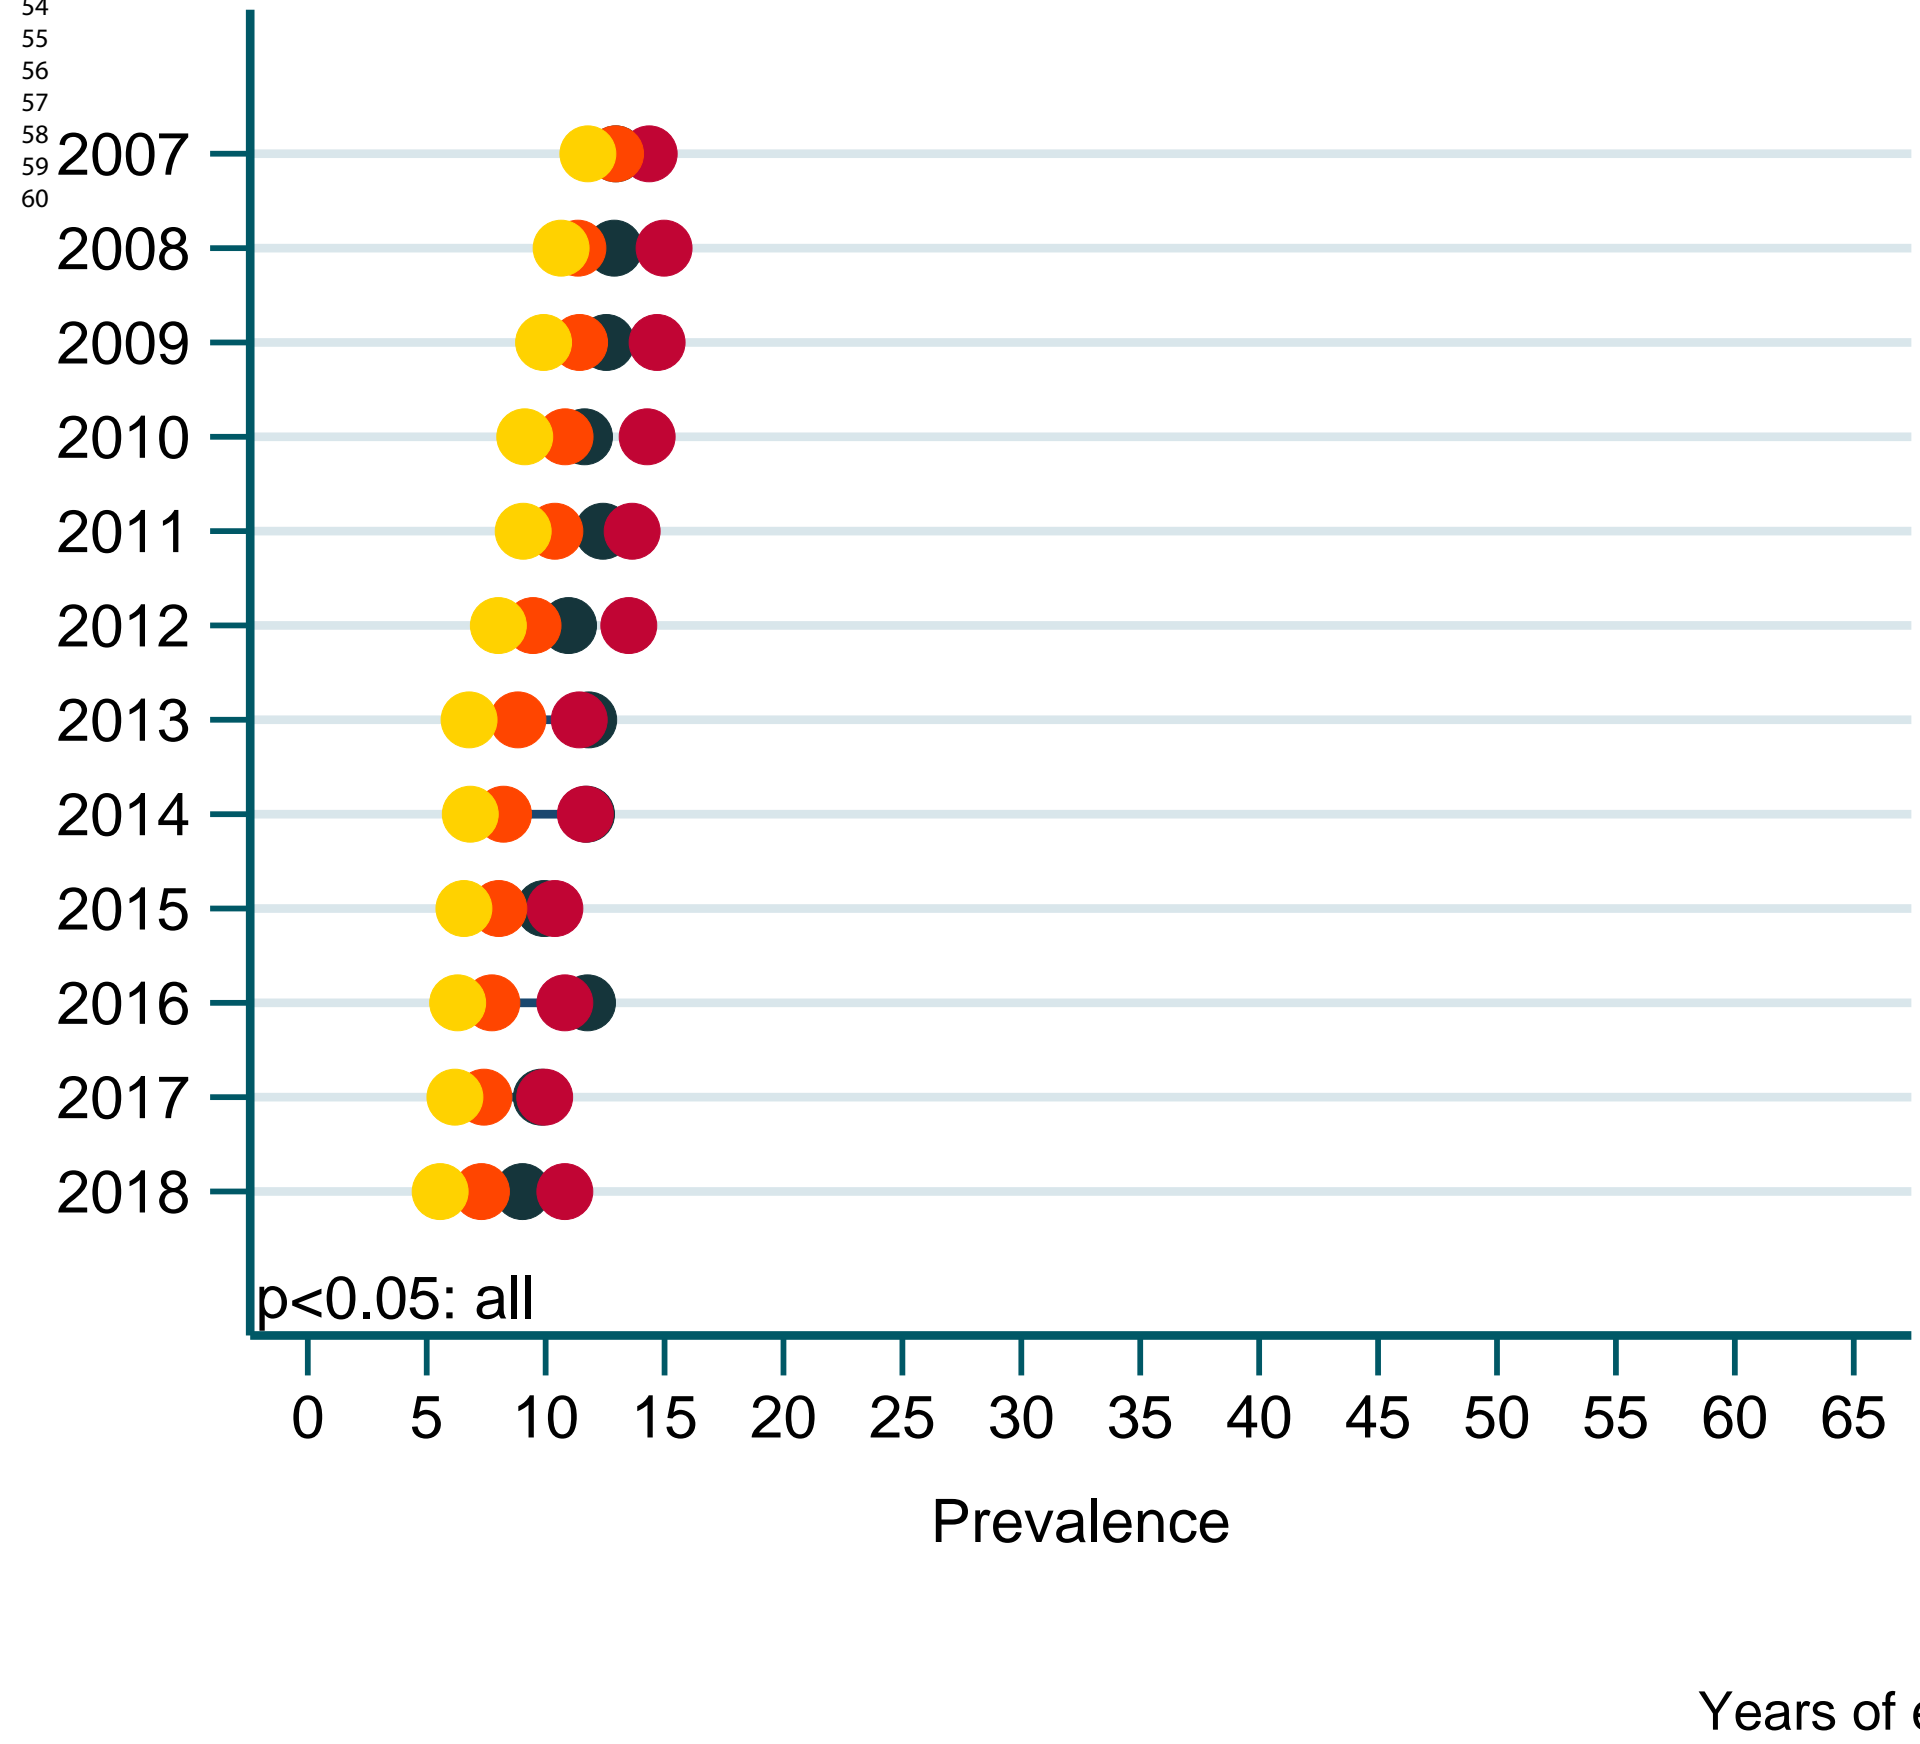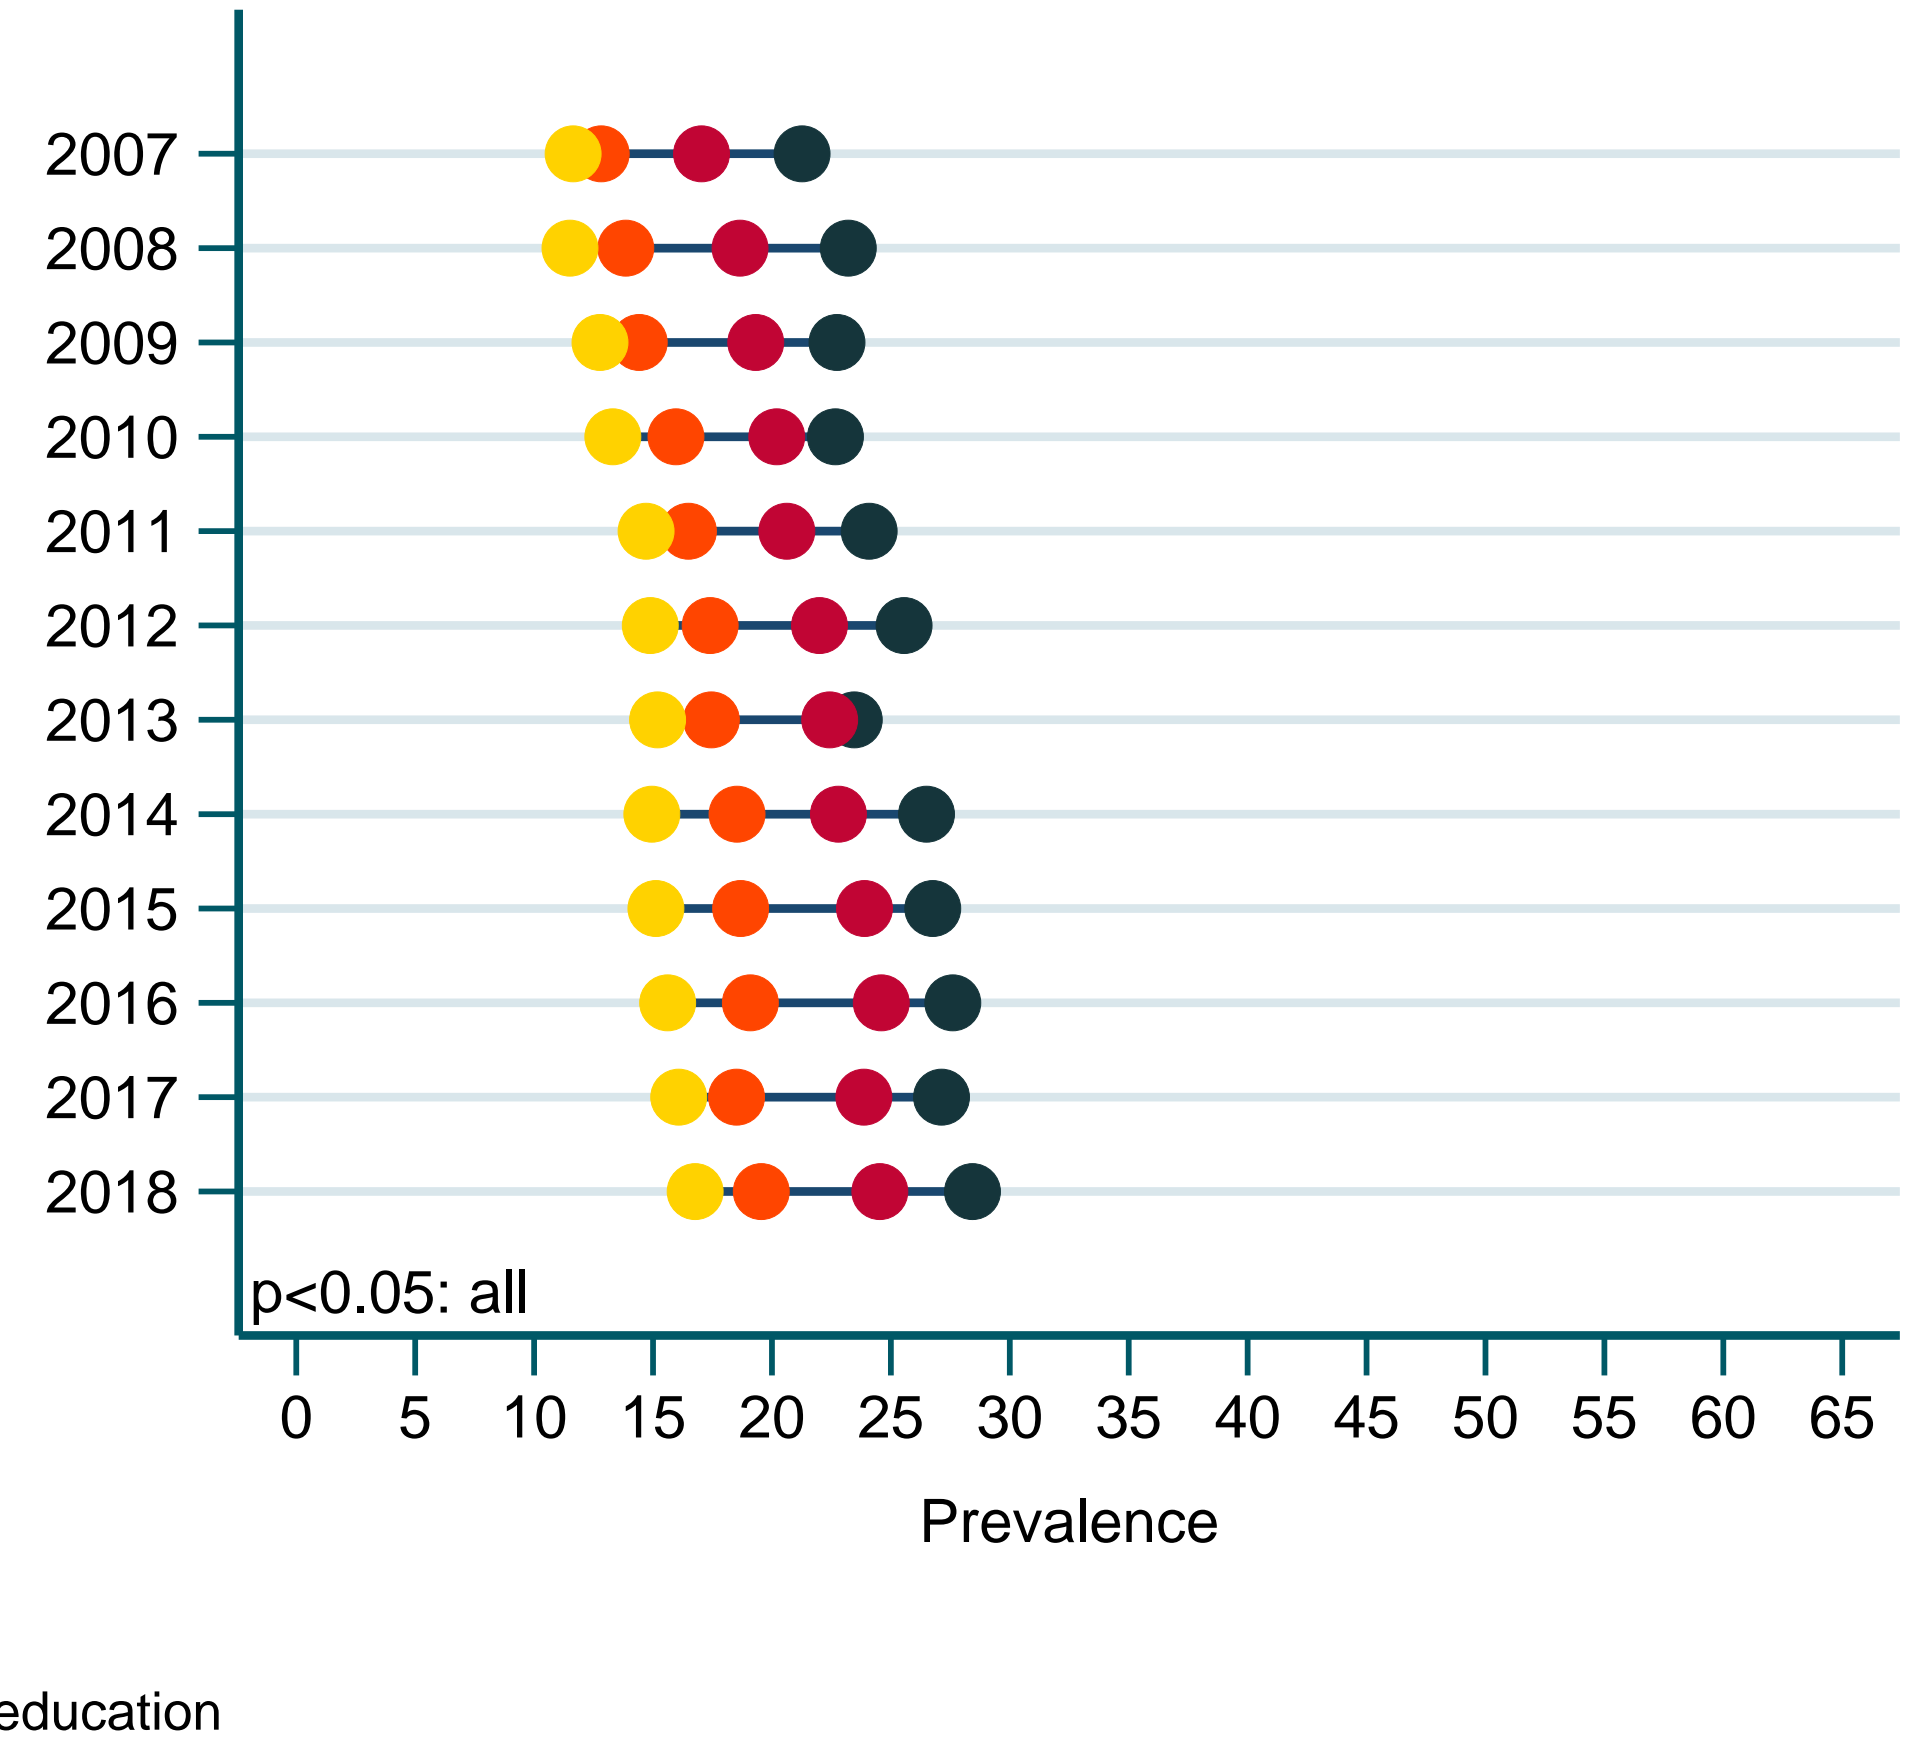

Years of education

0 to 3 years
  4 to 8 years
  9 to 11 years
  12 or more years

1  
2  
3  
4  
5  
6  
7  
8  
9  
10  
11  
12  
13  
14  
15  
16  
17  
18  
19  
20  
21  
22  
23  
24  
25  
26  
27  
28  
29  
30  
31  
32  
33  
34  
35  
36  
37  
38  
39  
40  
41  
42  
43  
44  
45  
46  
47  
48  
49  
50  
51  
52  
53  
54  
55  
56  
57  
58  
59  
60

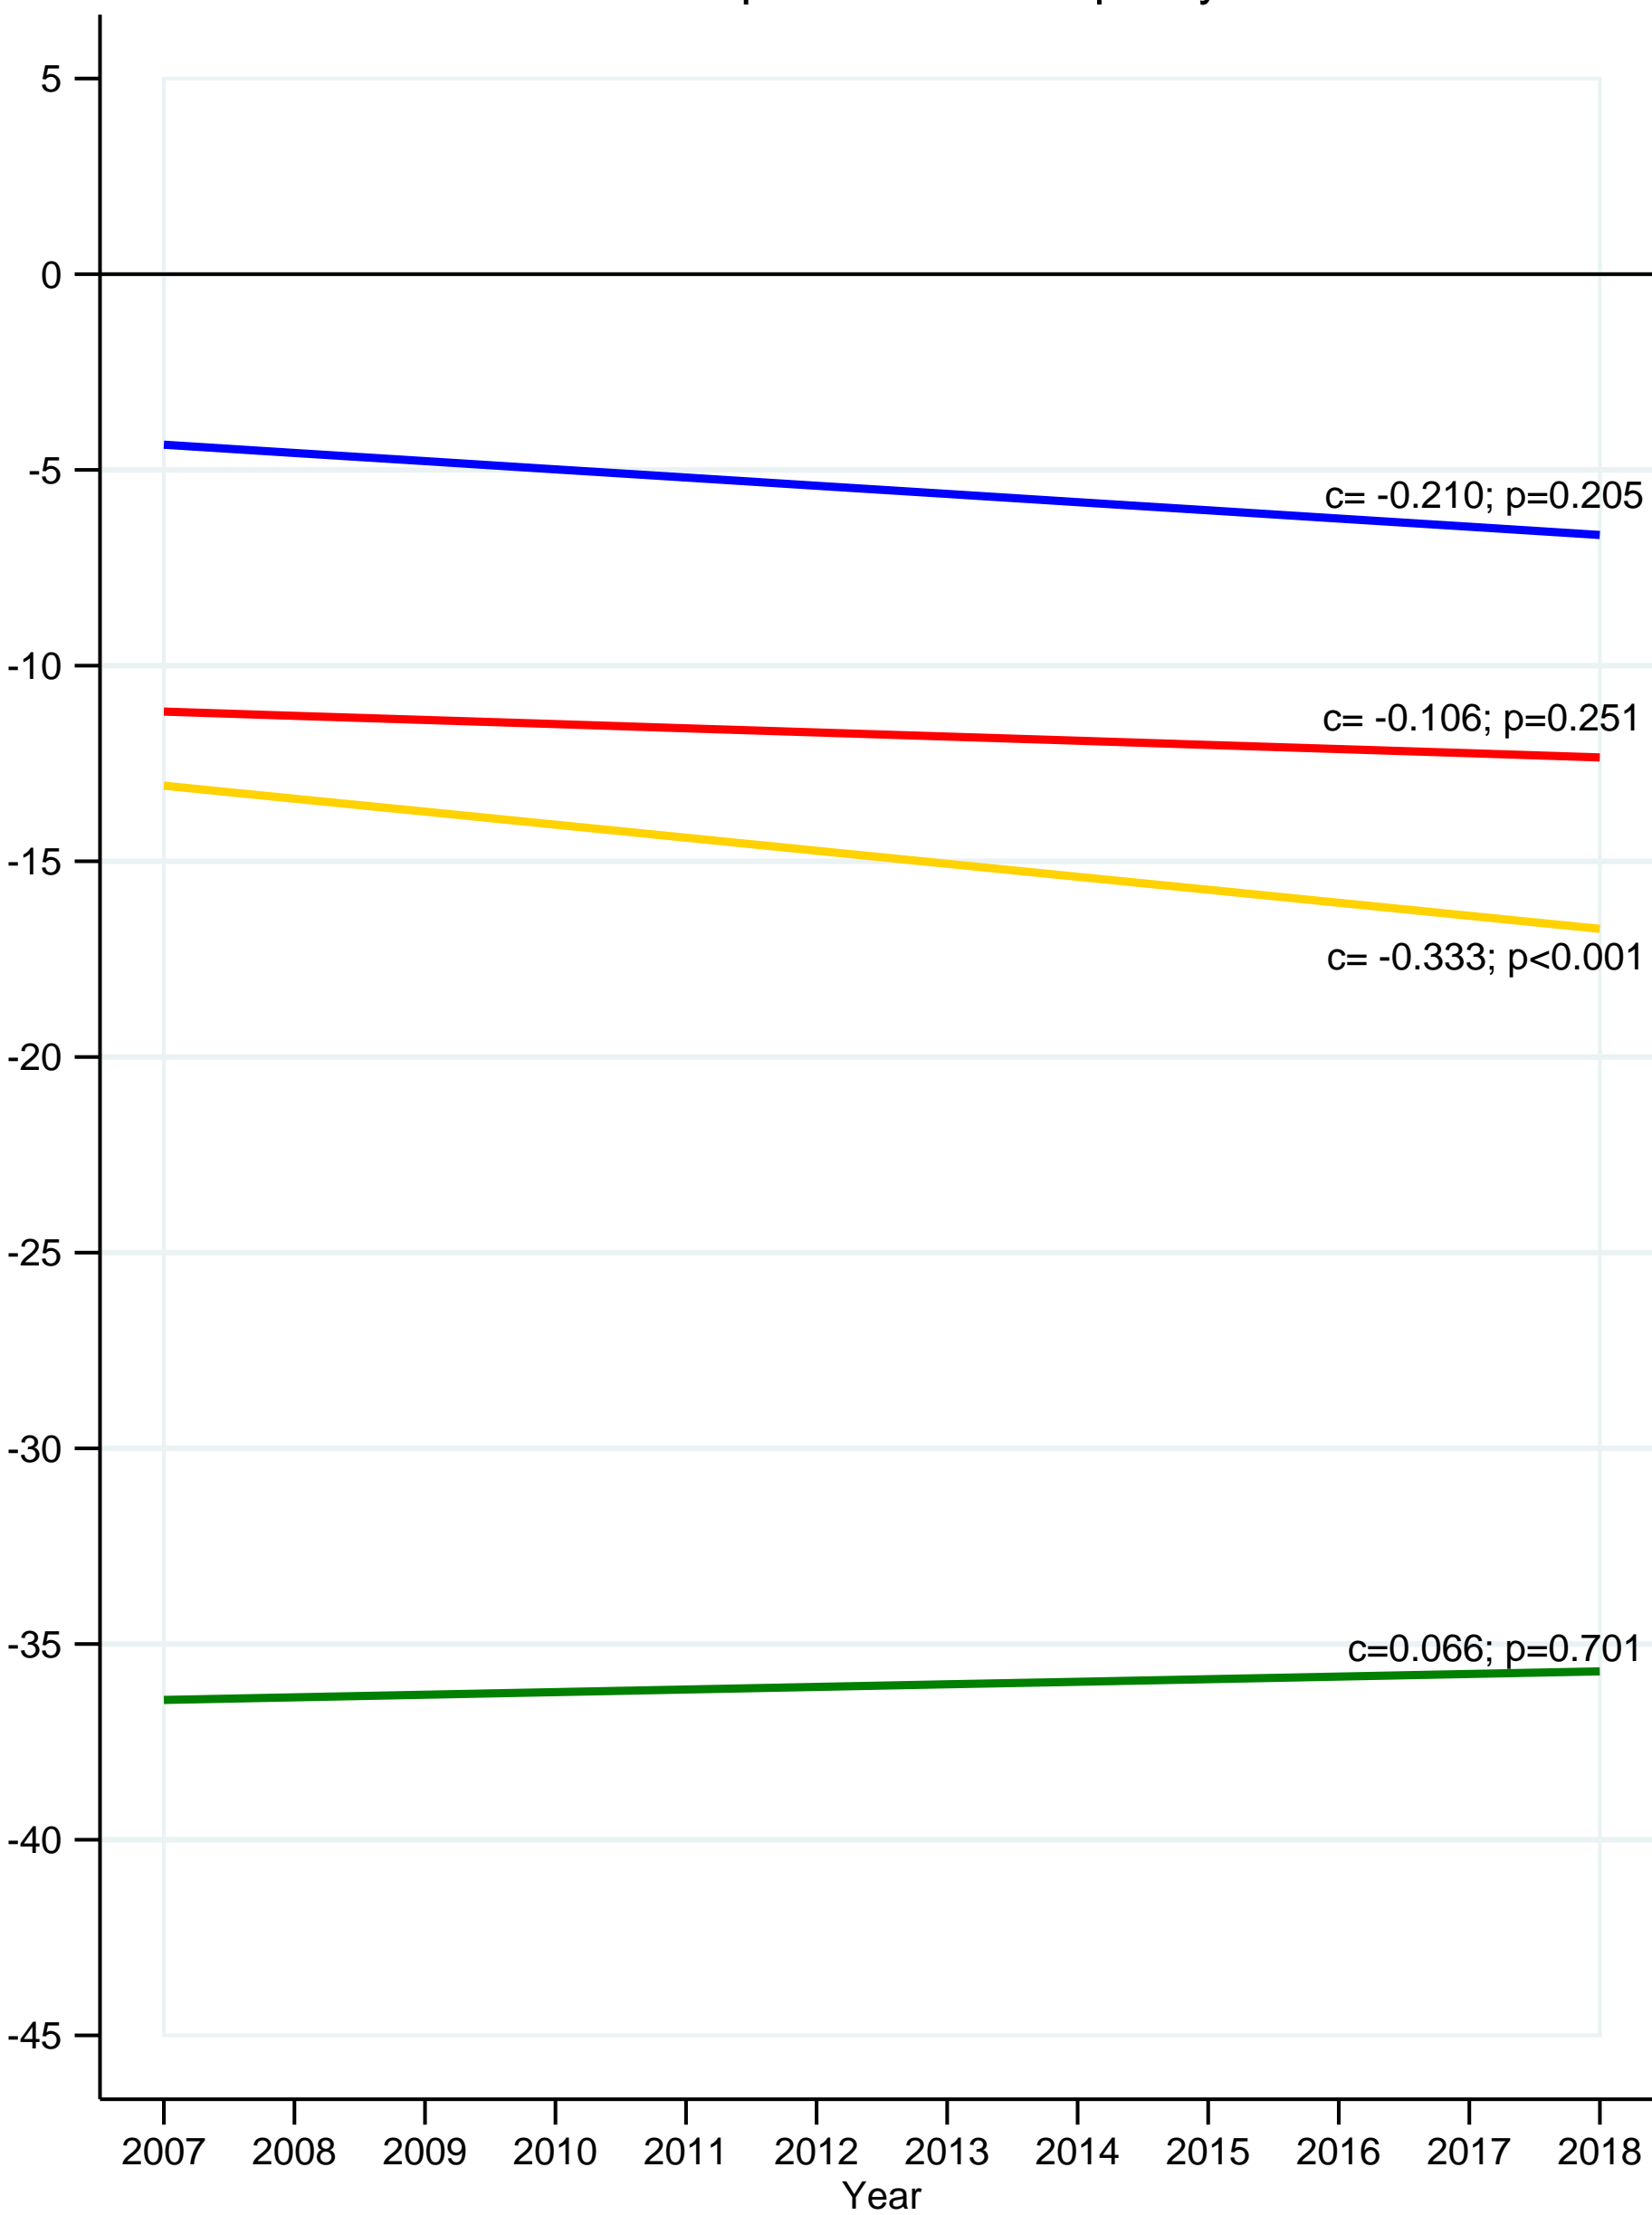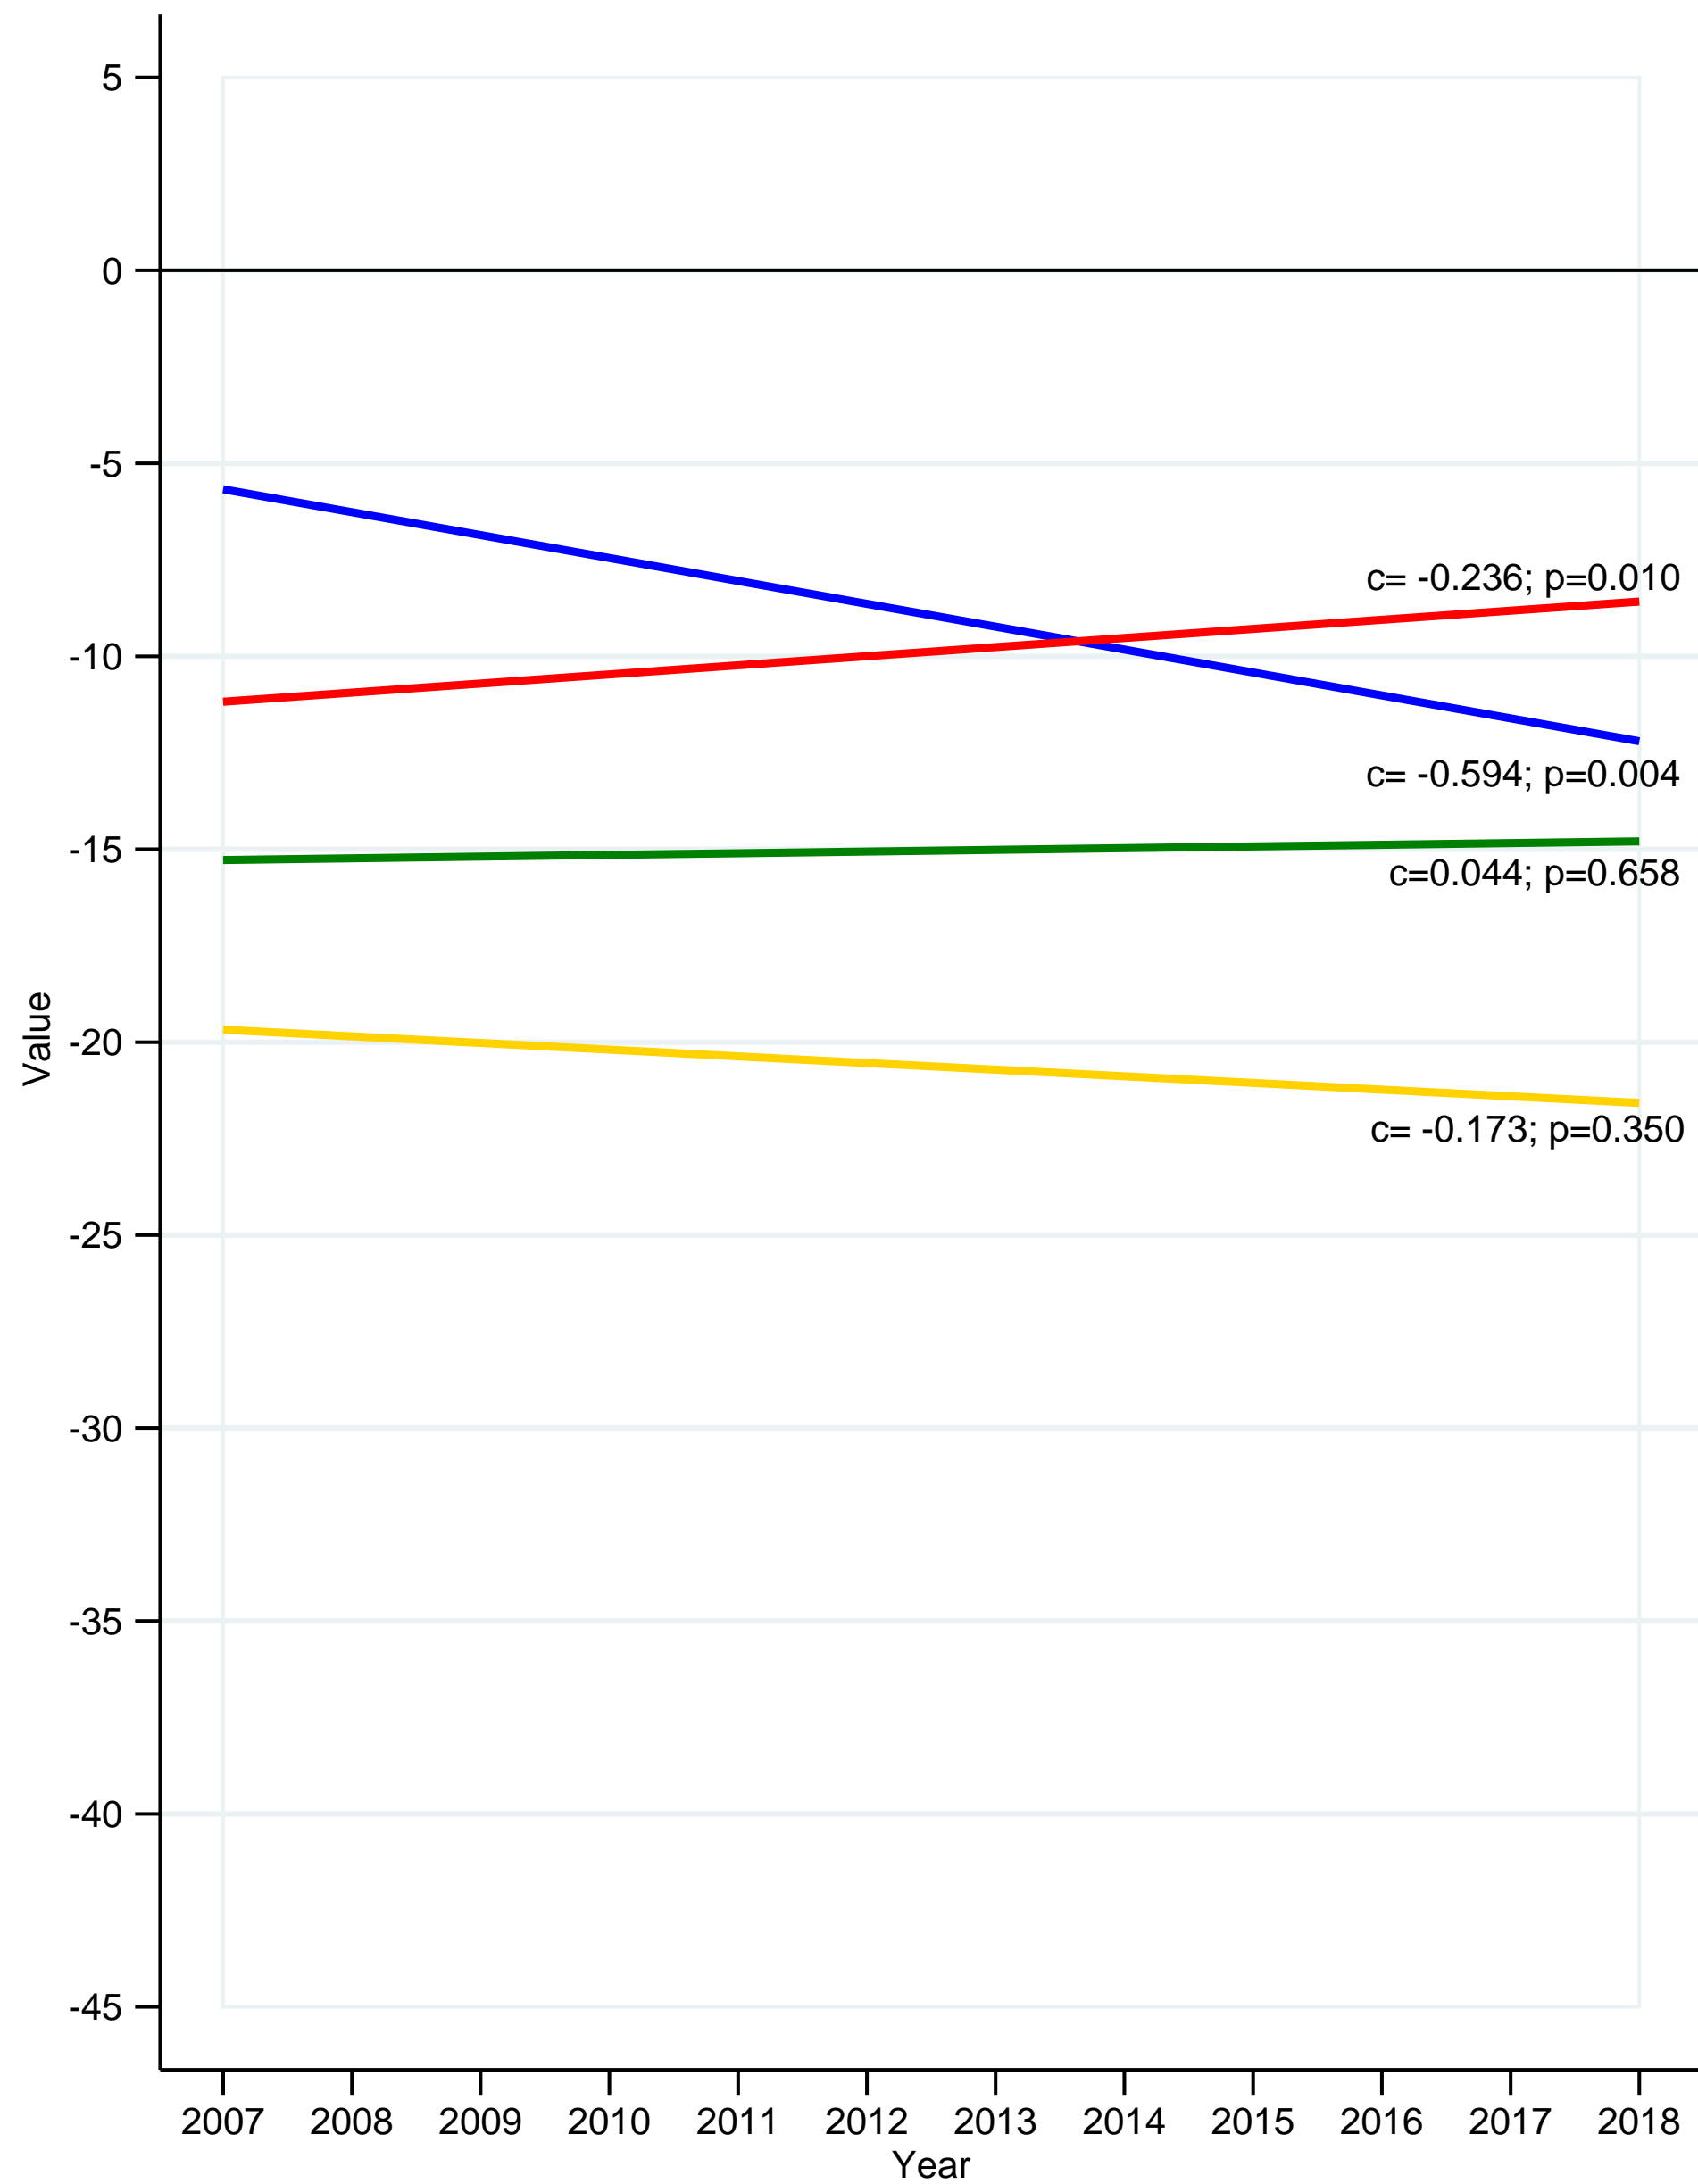

# Hypertension

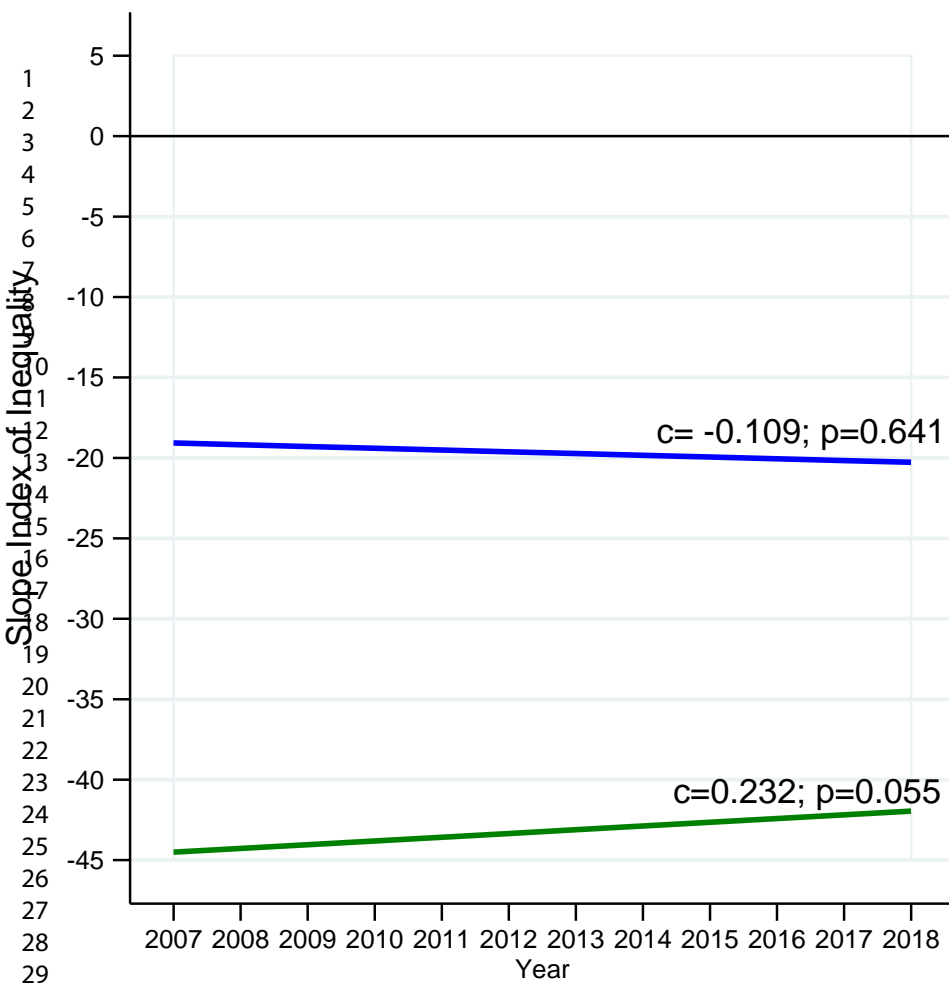

# Diabetes

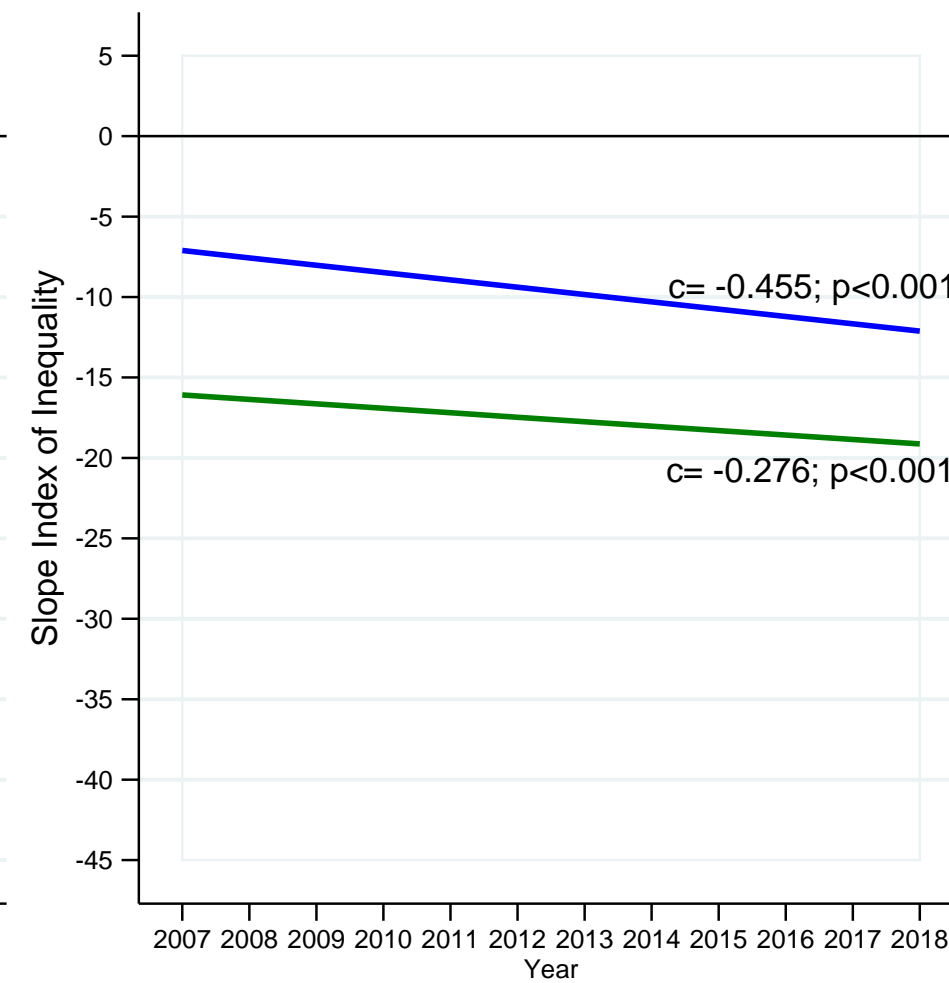

BMJ Open

# Smoking

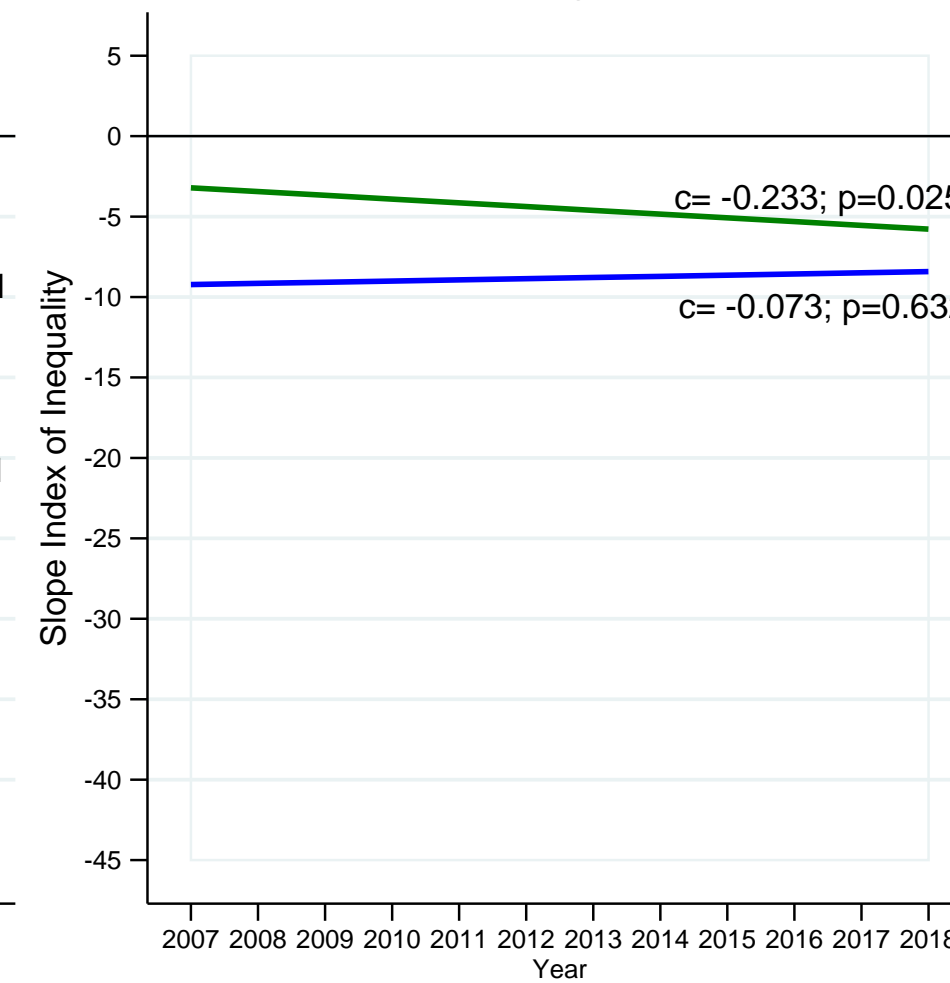

# Obesity

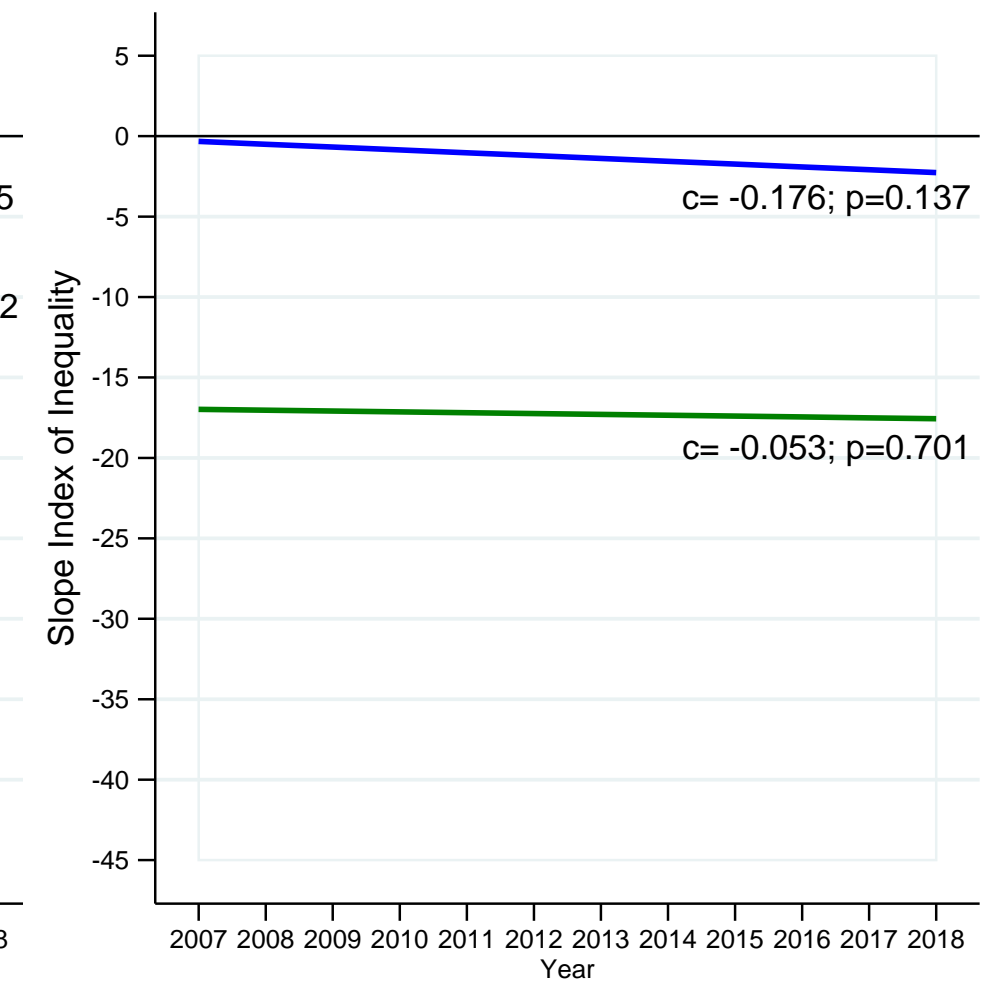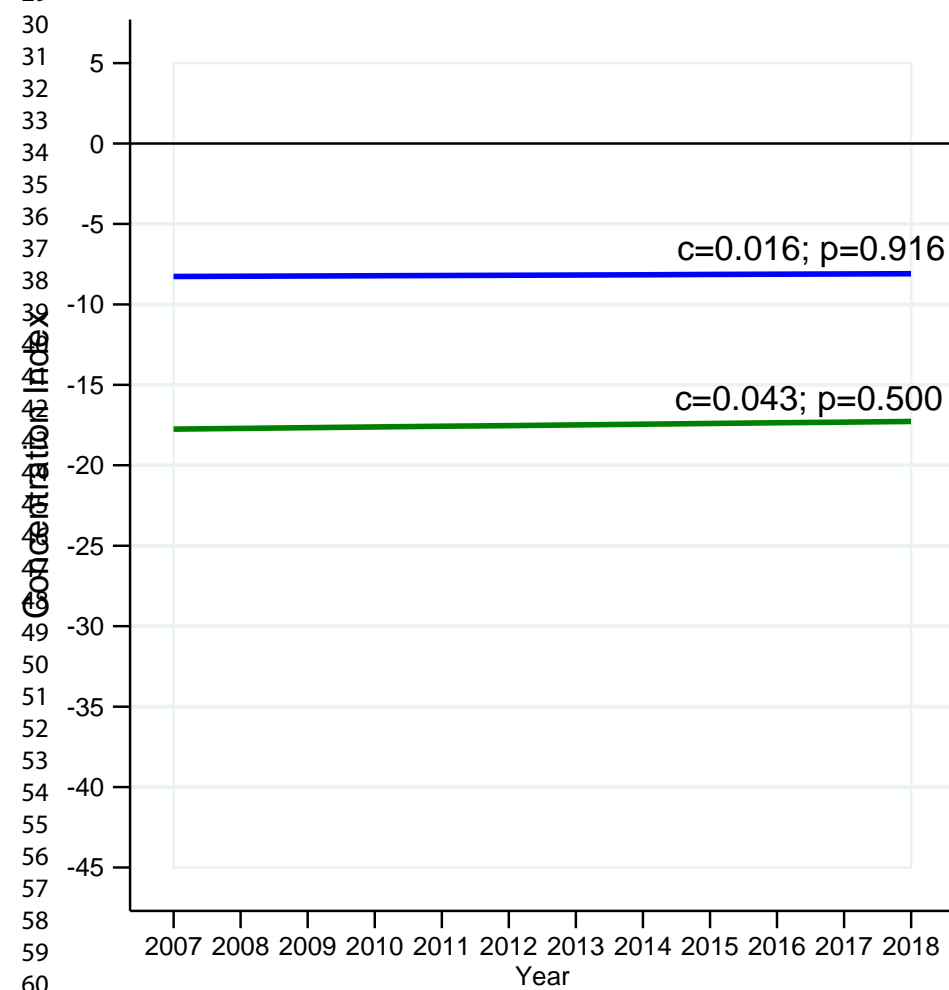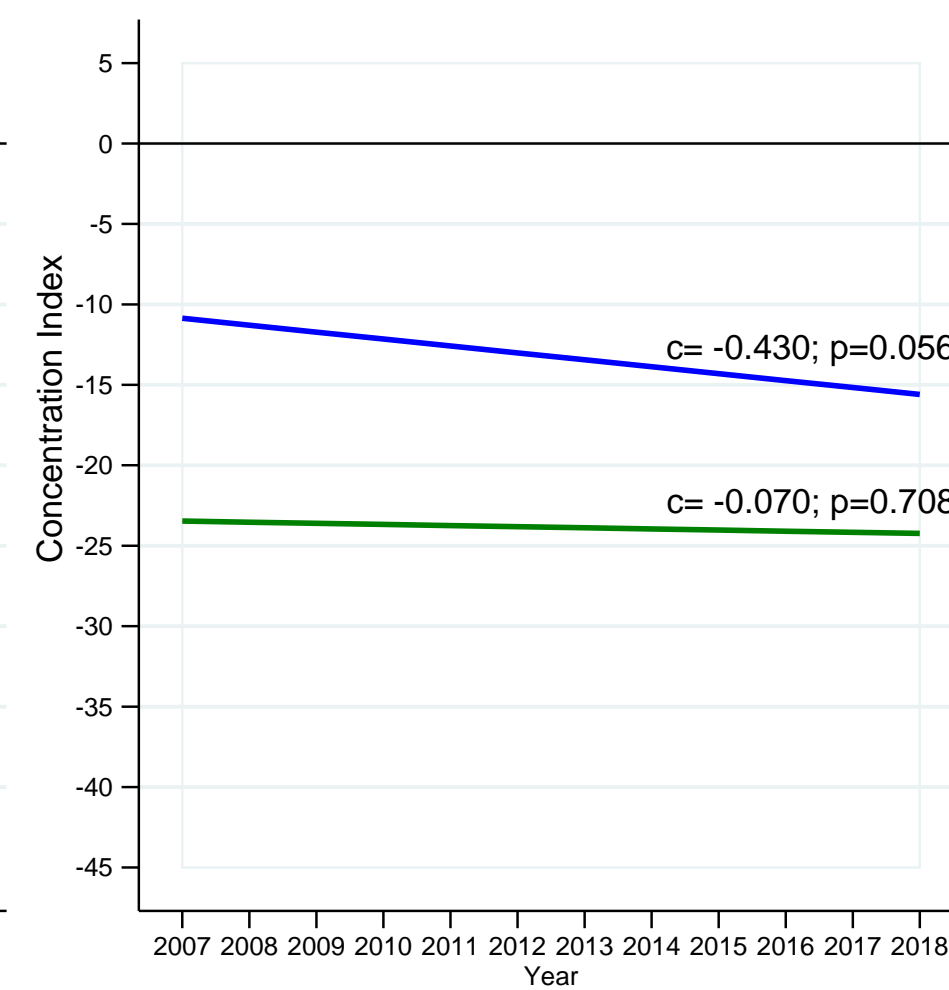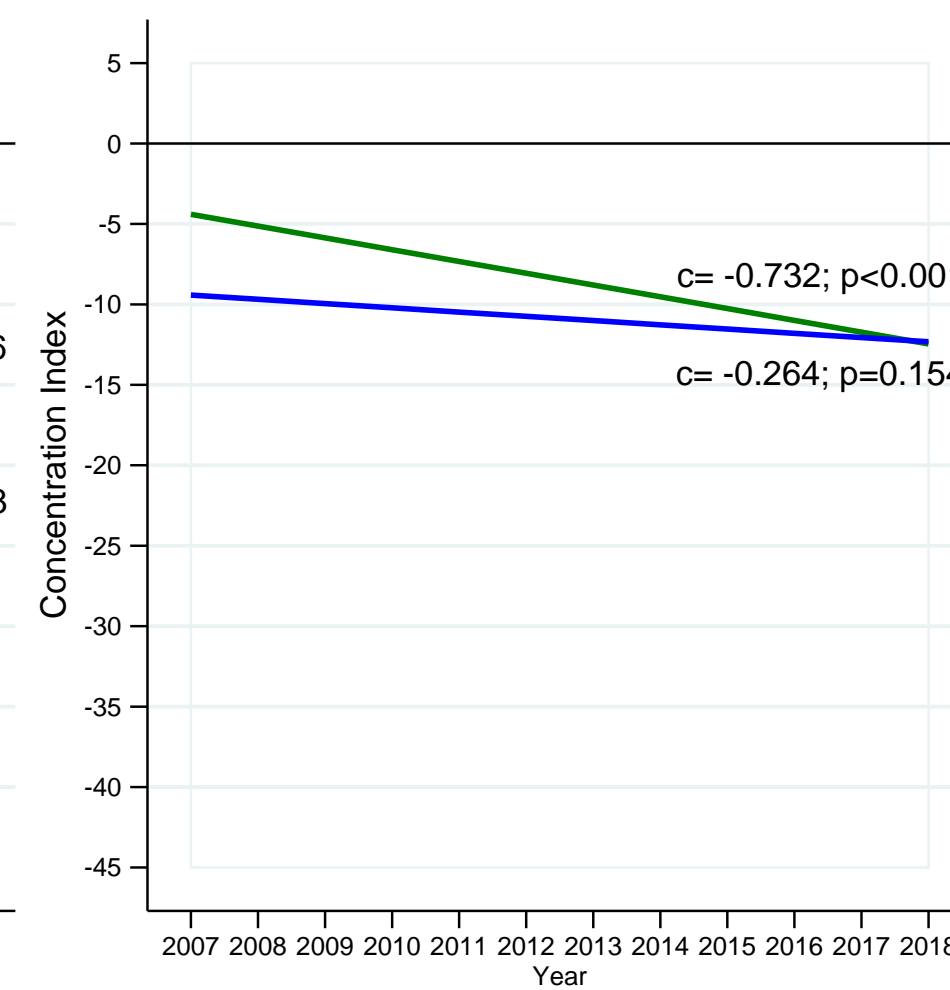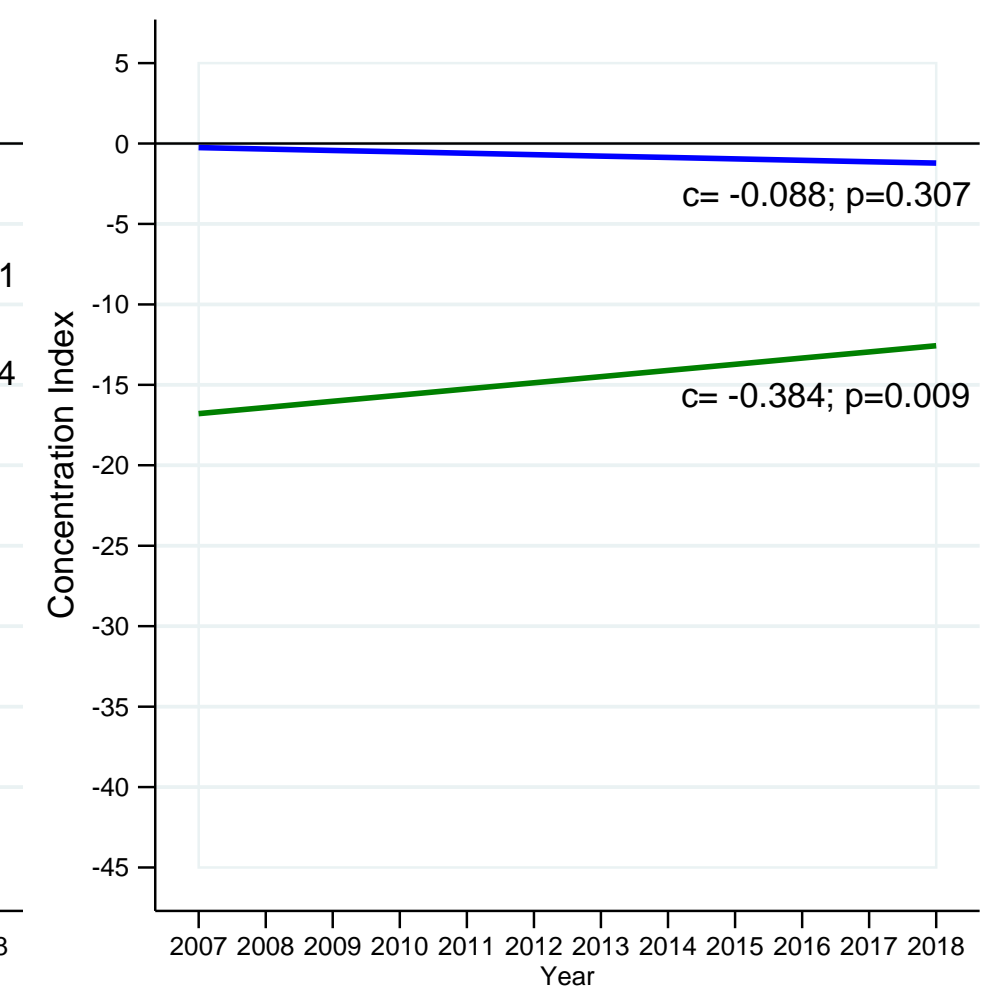

Female Male

# Hypertension

# Diabetes

BMJ Open

# Smoking

# Obesity

1  
2  
3  
4  
5  
18  
19  
20  
21  
22  
23  
24  
25  
26  
27  
28  
29  
30  
31  
32  
33  
34  
35  
36  
37  
38  
39  
40  
41  
42  
43  
44  
45  
46  
47  
48  
49  
50  
51  
52  
53  
54  
55  
56  
57  
58  
59  
60

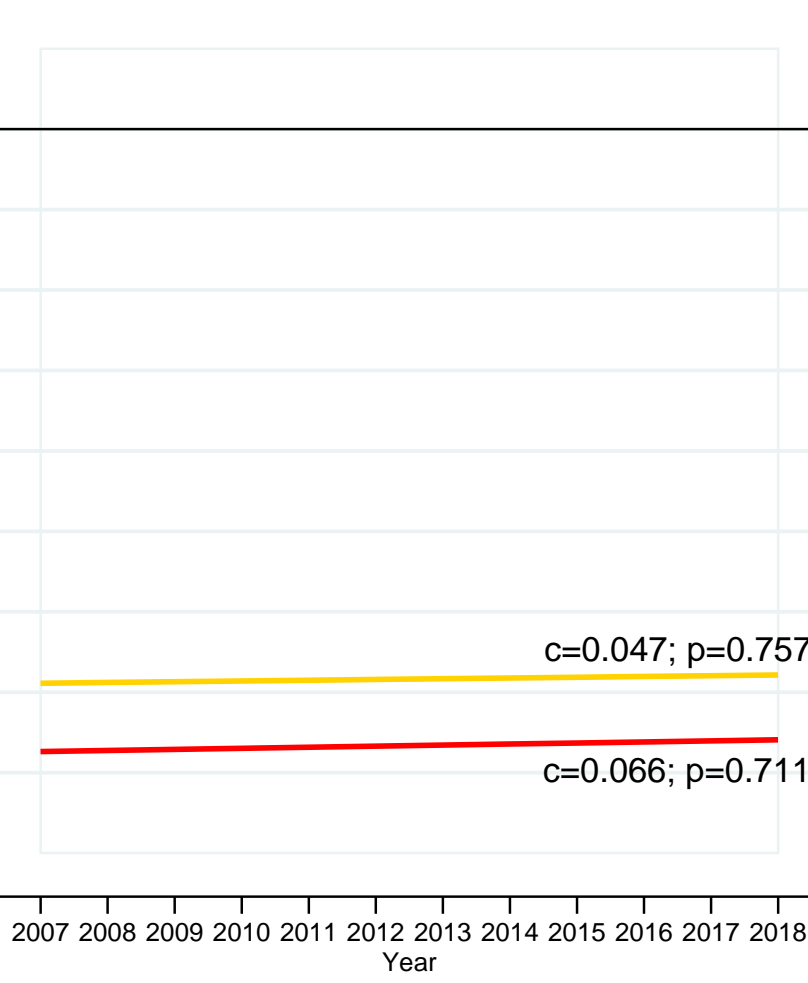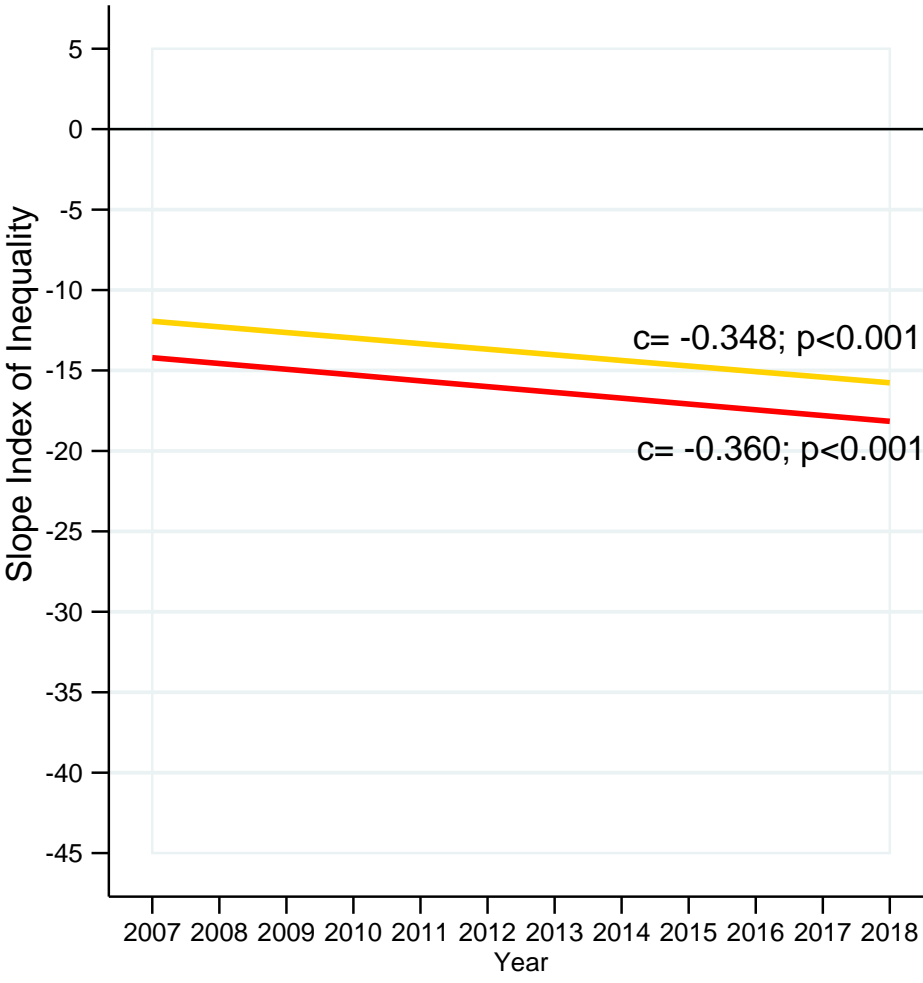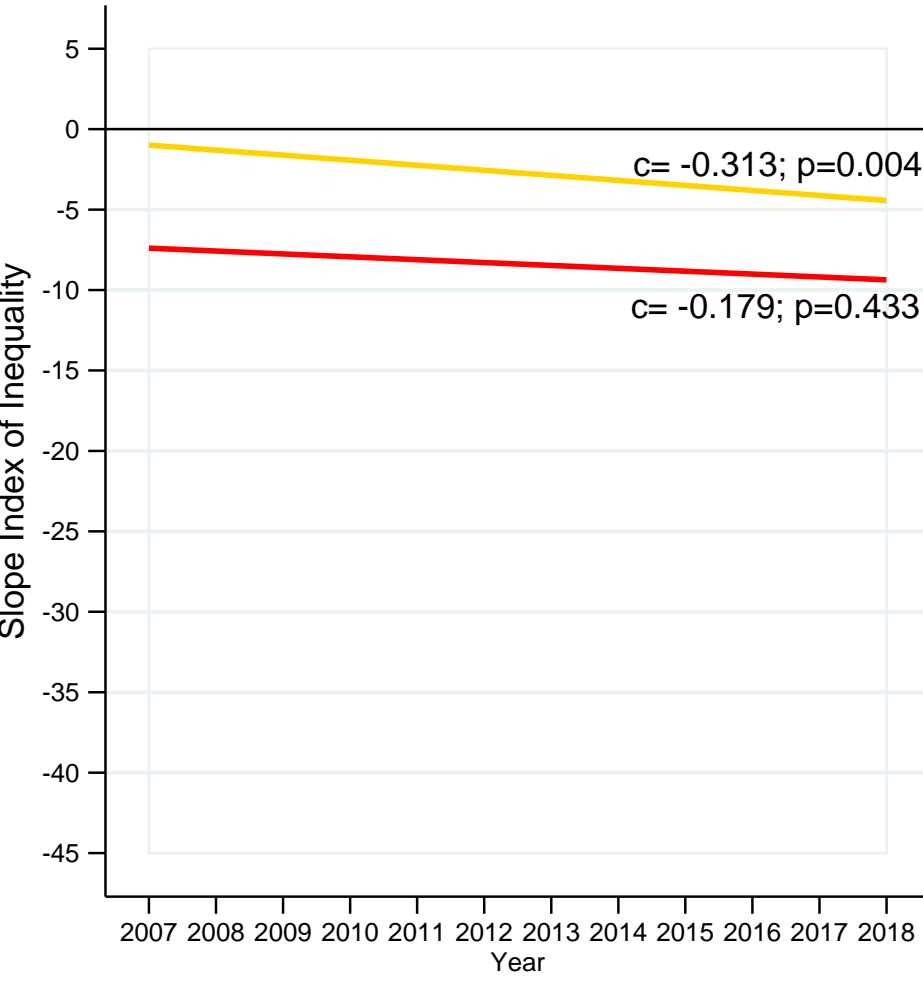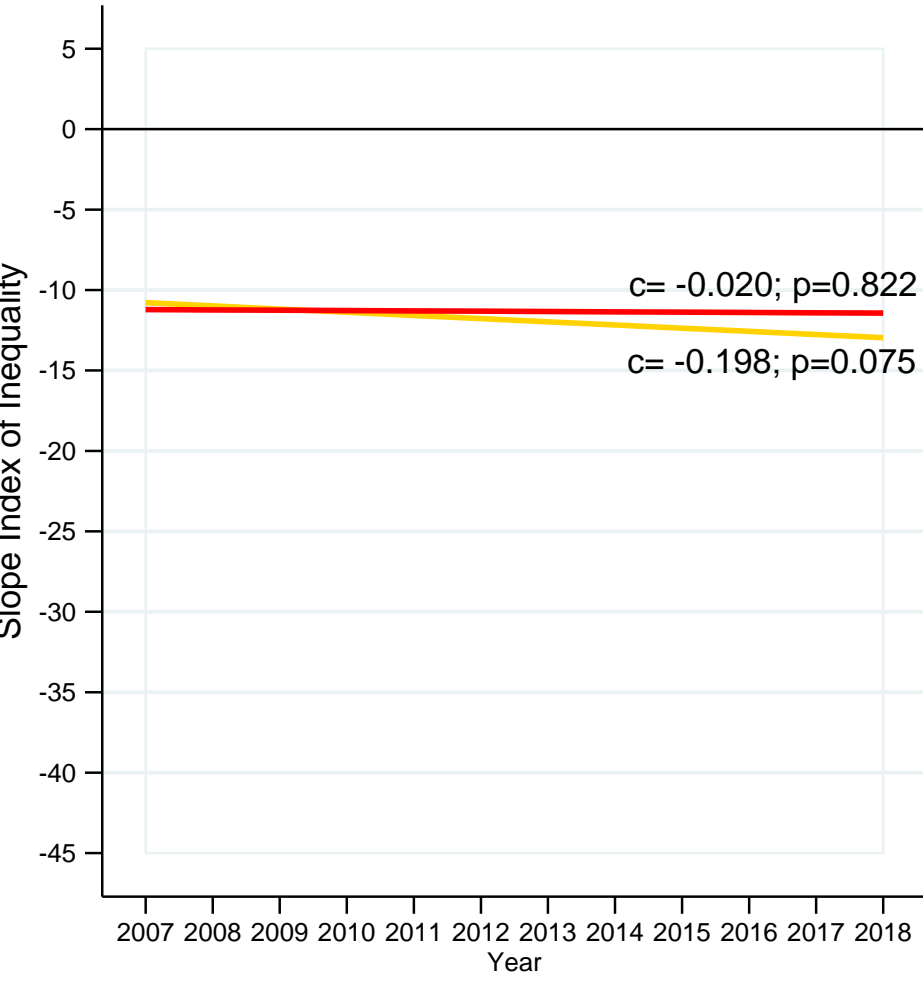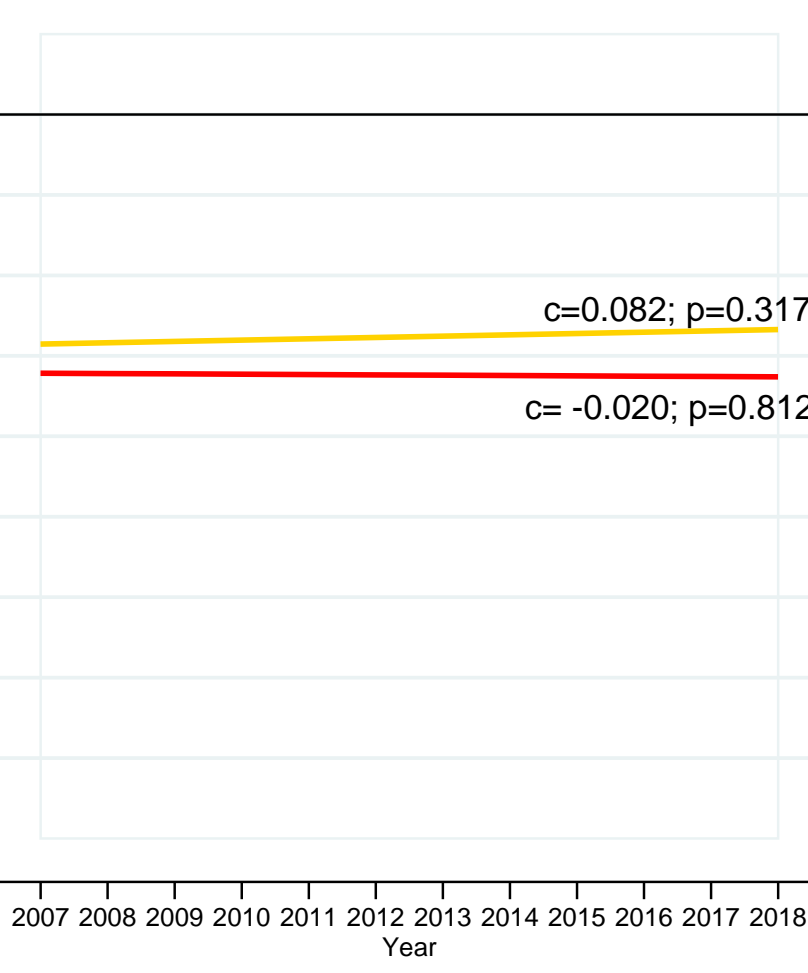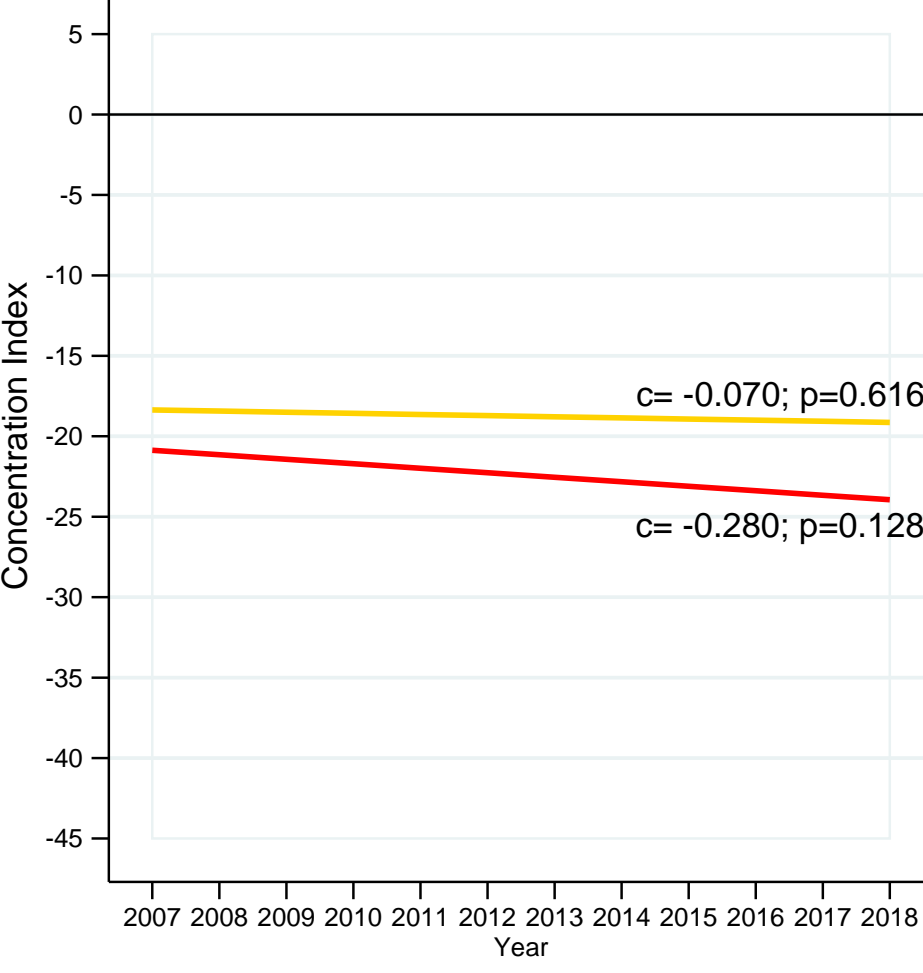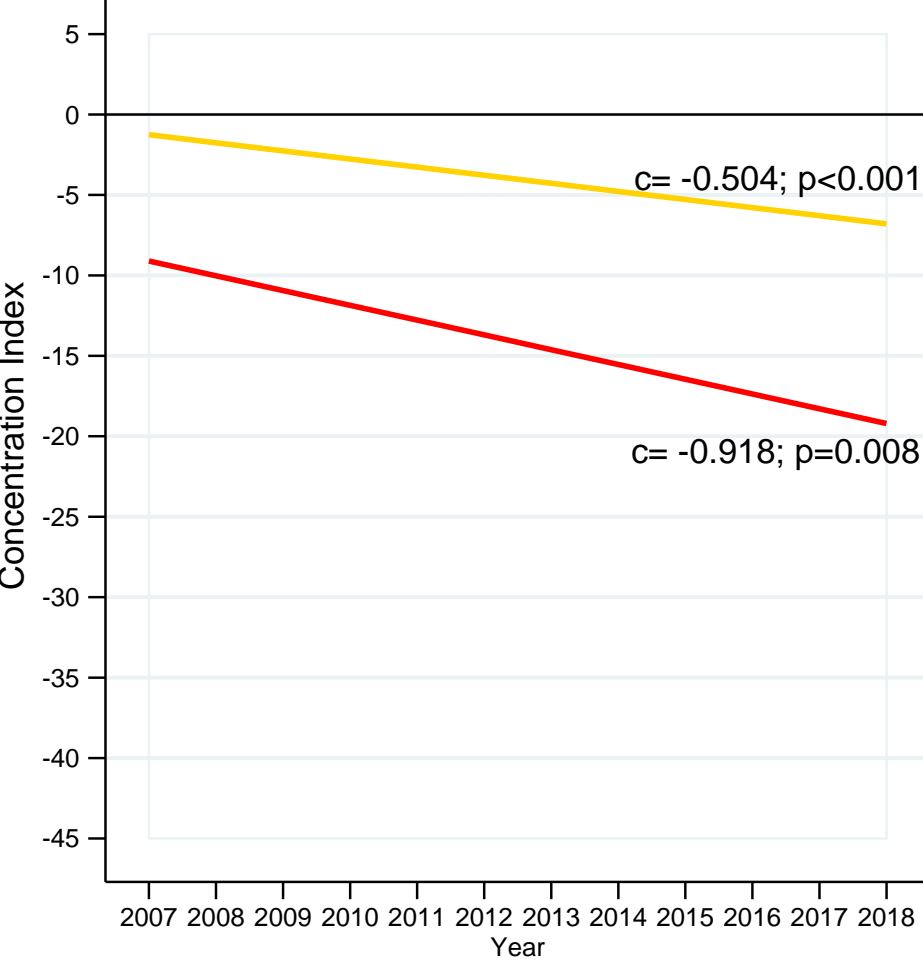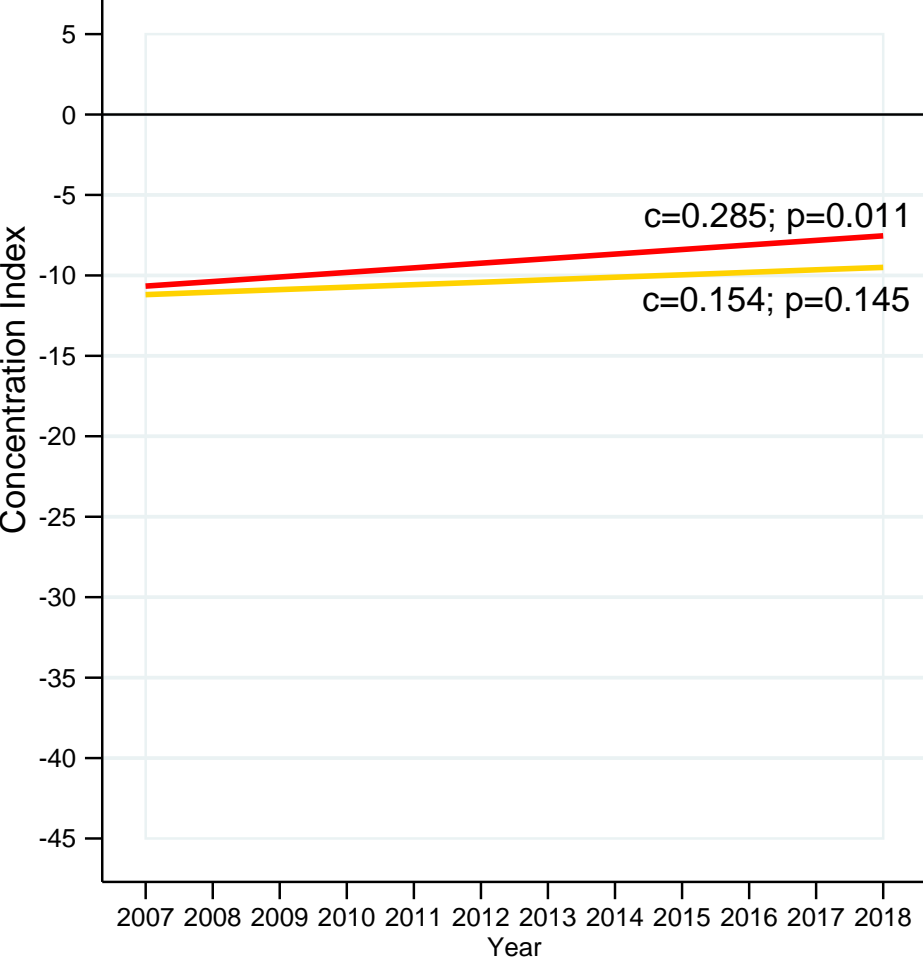

**Supplementary figure 1: Age-standardized prevalence of hypertension, diabetes, smoking and obesity by sex, VIGITEL 2007-2018.**

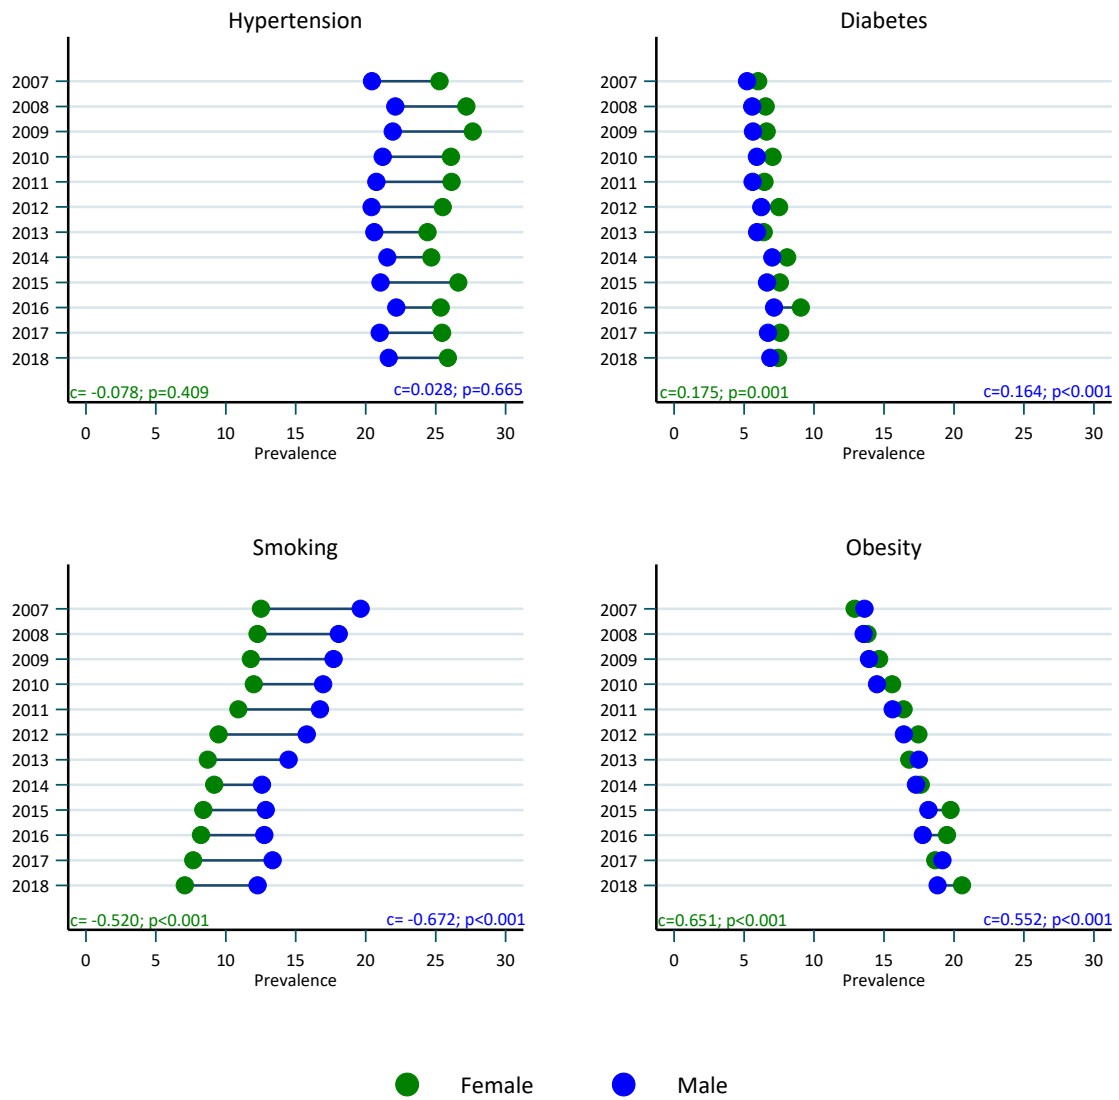

c: annual change (%); p= p-value

**Supplementary figure 2:** Age-standardized prevalence of hypertension, diabetes, smoking and obesity by skin color, VIGITEL 2007-2018.

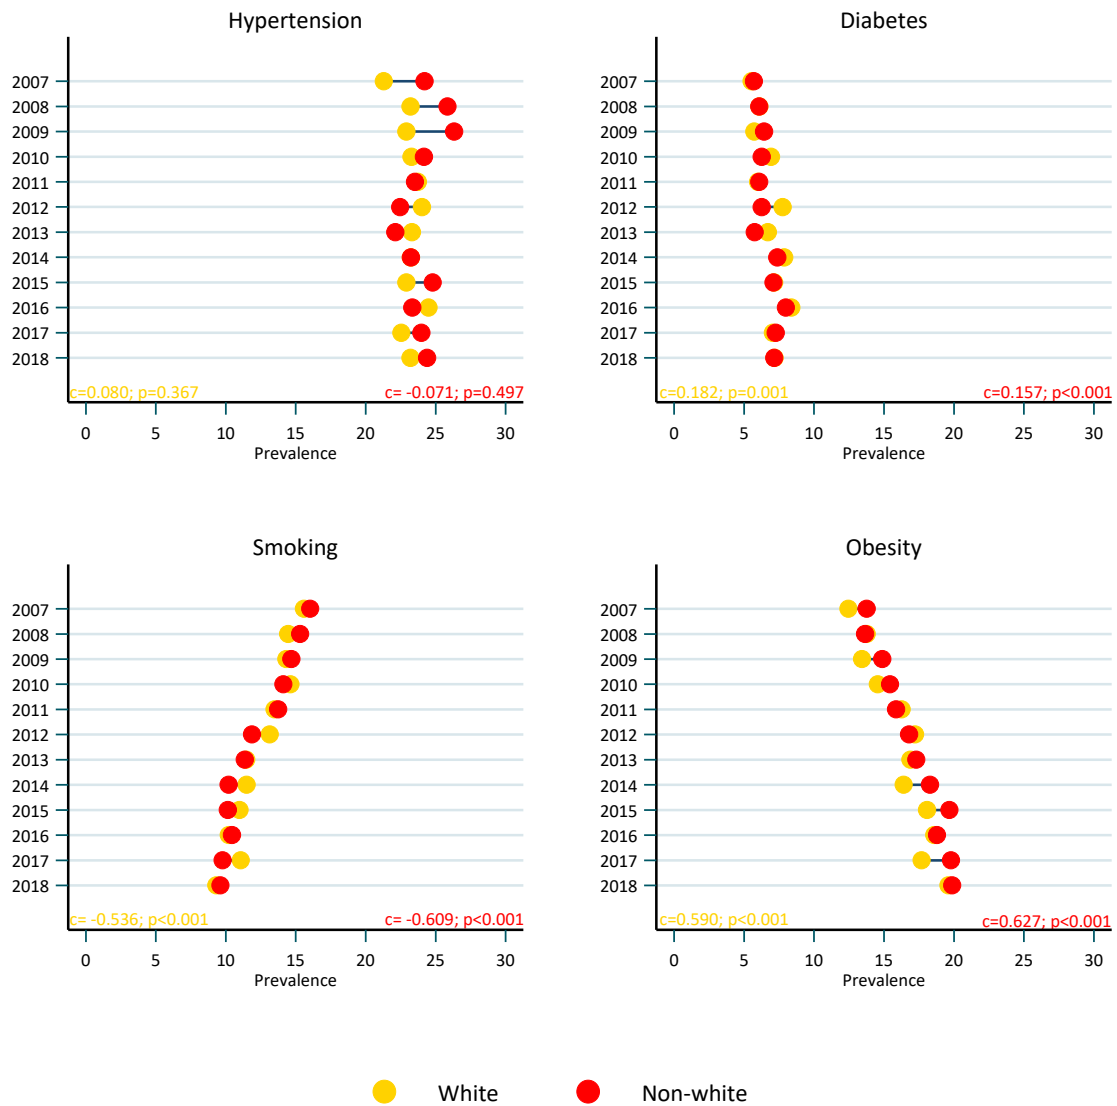

c: annual change (%); p= p-value

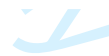

Supplementary table 1: Age-standardized prevalence of hypertension by years of education, sex and skin color, VIGITEL 2007-2018.

| Years fo education     |                   | Survey year (95% CI) |                   |                   |                   |                   |                   |                   |                   |                   |                   |                   | Annual change (%) | p value |  |
|------------------------|-------------------|----------------------|-------------------|-------------------|-------------------|-------------------|-------------------|-------------------|-------------------|-------------------|-------------------|-------------------|-------------------|---------|--|
| Sex and skin color (%) | 2007              | 2008                 | 2009              | 2010              | 2011              | 2012              | 2013              | 2014              | 2015              | 2016              | 2017              | 2018              |                   |         |  |
| 0-3 years              |                   |                      |                   |                   |                   |                   |                   |                   |                   |                   |                   |                   |                   |         |  |
| Total                  | 55.2 (53.3; 57.2) | 58.4 (56.5; 60.3)    | 60.8 (58.8; 62.8) | 59.0 (57.0; 61.0) | 57.0 (55.1; 58.9) | 56.0 (53.5; 58.4) | 56.6 (54.3; 58.9) | 59.8 (57.3; 62.4) | 57.9 (55.9; 59.9) | 61.9 (59.7; 64.1) | 59.2 (57.2; 61.2) | 60.7 (58.8; 62.6) | 0.29              | 0.112   |  |
| Female                 | 58.9 (56.5; 61.2) | 62.4 (60.1; 64.7)    | 64.6 (62.2; 67.0) | 63.0 (60.6; 65.4) | 62.1 (59.9; 64.4) | 60.0 (57.1; 62.9) | 62.2 (59.5; 64.9) | 62.5 (59.5; 65.6) | 62.5 (60.1; 64.9) | 66.7 (64.1; 69.3) | 62.6 (60.3; 65.0) | 63.6 (61.4; 65.9) | 0.25              | 0.179   |  |
| Male                   | 46.2 (42.8; 49.5) | 48.3 (45.0; 51.7)    | 50.7 (47.1; 54.3) | 48.8 (45.2; 52.4) | 43.3 (40.0; 46.7) | 45.1 (40.8; 49.4) | 43.3 (39.3; 47.2) | 52.6 (48.2; 57.1) | 45.3 (41.8; 48.9) | 50.4 (46.5; 54.2) | 50.5 (47.0; 54.0) | 52.9 (49.5; 56.4) | 0.35              | 0.112   |  |
| White                  | 54.6 (50.9; 58.2) | 57.6 (54.0; 61.3)    | 59.0 (55.1; 63.0) | 61.5 (57.7; 65.2) | 58.9 (55.7; 62.0) | 55.8 (51.9; 59.6) | 56.9 (53.4; 60.4) | 56.6 (52.7; 60.5) | 57.2 (53.7; 60.7) | 61.5 (58.2; 64.8) | 58.6 (55.3; 62.0) | 61.6 (58.3; 64.8) | 0.34              | 0.156   |  |
| Non-white              | 55.5 (53.2; 57.9) | 58.8 (56.5; 61.0)    | 61.5 (59.2; 63.8) | 57.9 (55.5; 60.3) | 55.9 (53.6; 58.3) | 56.1 (53.0; 59.2) | 56.3 (53.3; 59.3) | 62.5 (59.1; 65.8) | 58.2 (55.8; 60.7) | 62.3 (59.4; 65.2) | 59.5 (57.1; 62.0) | 60.2 (57.9; 62.5) | 0.30              | 0.083   |  |
| 4-8 years              |                   |                      |                   |                   |                   |                   |                   |                   |                   |                   |                   |                   |                   |         |  |
| Total                  | 44.0 (42.8; 45.2) | 45.4 (44.2; 46.6)    | 46.7 (45.5; 47.9) | 46.9 (45.7; 48.0) | 46.1 (44.9; 47.2) | 47.1 (45.8; 48.4) | 48.8 (47.6; 50.0) | 47.1 (45.8; 48.4) | 47.8 (46.7; 48.9) | 49.6 (48.4; 50.9) | 49.5 (48.4; 50.7) | 49.5 (48.4; 50.6) | 0.45              | <0.001  |  |
| Female                 | 48.3 (46.8; 49.9) | 50.6 (49.1; 52.2)    | 50.4 (48.9; 51.9) | 50.9 (49.4; 52.4) | 51.0 (49.6; 52.5) | 52.1 (50.4; 53.8) | 53.4 (51.9; 54.9) | 51.3 (49.6; 53.0) | 52.7 (51.3; 54.1) | 54.1 (52.6; 55.7) | 53.6 (52.2; 55.0) | 53.5 (52.1; 54.9) | 0.42              | <0.001  |  |
| Male                   | 35.3 (33.4; 37.1) | 34.6 (32.7; 36.4)    | 38.8 (36.9; 40.7) | 38.2 (36.4; 40.1) | 36.2 (34.5; 37.9) | 36.7 (34.6; 38.7) | 38.5 (36.6; 40.4) | 37.9 (35.7; 40.0) | 37.7 (36.0; 39.4) | 40.5 (38.5; 42.4) | 40.9 (39.0; 42.8) | 40.6 (38.8; 42.5) | 0.46              | 0.001   |  |
| White                  | 45.7 (43.6; 47.8) | 48.2 (46.1; 50.3)    | 47.2 (45.0; 49.3) | 48.5 (46.4; 50.6) | 47.8 (45.9; 49.7) | 48.9 (46.9; 51.0) | 51.8 (49.9; 53.6) | 48.0 (45.9; 50.0) | 48.9 (47.0; 50.7) | 50.7 (48.9; 52.5) | 51.4 (49.6; 53.2) | 50.1 (48.3; 51.9) | 0.37              | <0.001  |  |
| Non-white              | 43.0 (41.5; 44.4) | 43.9 (42.4; 45.3)    | 46.4 (44.9; 47.9) | 45.9 (44.5; 47.4) | 44.8 (43.3; 46.3) | 45.6 (43.8; 47.3) | 46.1 (44.5; 47.7) | 46.4 (44.6; 48.2) | 47.2 (45.8; 48.6) | 48.7 (47.1; 50.4) | 48.3 (46.8; 49.7) | 49.1 (47.7; 50.6) | 0.48              | <0.001  |  |
| 9-11 years             |                   |                      |                   |                   |                   |                   |                   |                   |                   |                   |                   |                   |                   |         |  |
| Total                  | 27.2 (26.3; 28.1) | 29.2 (28.3; 30.1)    | 29.6 (28.7; 30.5) | 30.7 (29.9; 31.6) | 29.2 (28.3; 30.0) | 29.3 (28.4; 30.2) | 28.8 (28.0; 29.6) | 29.4 (28.5; 30.3) | 30.0 (29.3; 30.8) | 30.6 (29.8; 31.4) | 29.8 (29.0; 30.6) | 30.3 (29.5; 31.1) | 0.17              | 0.112   |  |
| Female                 | 29.0 (27.8; 30.2) | 31.4 (30.2; 32.6)    | 31.6 (30.4; 32.7) | 32.7 (31.6; 33.9) | 31.0 (29.9; 32.1) | 31.5 (30.3; 32.6) | 31.0 (29.9; 32.1) | 31.3 (30.1; 32.5) | 32.9 (31.9; 33.9) | 32.6 (31.5; 33.7) | 32.0 (31.0; 33.1) | 33.1 (32.0; 34.1) | 0.22              | 0.043   |  |
| Male                   | 24.1 (22.8; 25.4) | 25.5 (24.2; 26.7)    | 26.2 (24.9; 27.5) | 27.1 (25.8; 28.4) | 26.1 (24.9; 27.3) | 25.5 (24.2; 26.8) | 25.2 (24.1; 26.4) | 26.2 (24.9; 27.6) | 25.2 (24.1; 26.3) | 27.2 (26.1; 28.4) | 26.0 (24.9; 27.2) | 25.5 (24.3; 26.6) | 0.07              | 0.496   |  |
| White                  | 27.9 (26.4; 29.4) | 31.4 (29.9; 32.9)    | 31.3 (29.8; 32.7) | 33.1 (31.6; 34.6) | 32.4 (31.0; 33.8) | 33.3 (31.8; 34.7) | 31.1 (29.8; 32.4) | 31.8 (30.4; 33.3) | 31.4 (30.2; 32.7) | 33.4 (32.2; 34.7) | 32.0 (30.7; 33.3) | 31.9 (30.6; 33.1) | 0.21              | 0.276   |  |
| Non-white              | 26.7 (25.6; 27.8) | 27.8 (26.7; 28.9)    | 28.5 (27.5; 29.6) | 29.3 (28.2; 30.3) | 26.8 (25.8; 27.8) | 26.3 (25.2; 27.4) | 27.1 (26.0; 28.1) | 27.7 (26.5; 28.8) | 29.2 (28.2; 30.1) | 28.6 (27.6; 29.6) | 28.5 (27.5; 29.4) | 29.3 (28.3; 30.2) | 0.16              | 0.040   |  |
| 12 or more years       |                   |                      |                   |                   |                   |                   |                   |                   |                   |                   |                   |                   |                   |         |  |
| Total                  | 23.7 (22.7; 24.6) | 25.0 (24.0; 25.9)    | 25.0 (24.1; 25.9) | 25.6 (24.7; 26.5) | 25.3 (24.4; 26.2) | 24.4 (23.5; 25.3) | 23.8 (23.0; 24.6) | 25.1 (24.2; 26.0) | 25.2 (24.5; 25.9) | 25.3 (24.6; 26.0) | 24.6 (23.9; 25.3) | 23.8 (23.1; 24.4) | -0.01             | 0.954   |  |
| Female                 | 22.4 (21.1; 23.6) | 23.9 (22.7; 25.1)    | 24.3 (23.2; 25.5) | 25.4 (24.3; 26.5) | 24.3 (23.2; 25.5) | 23.9 (22.7; 25.0) | 23.0 (22.0; 24.0) | 25.0 (23.8; 26.2) | 25.2 (24.2; 26.1) | 24.7 (23.8; 25.6) | 24.0 (23.2; 24.9) | 23.6 (22.8; 24.5) | 0.08              | 0.504   |  |
| Male                   | 25.7 (24.3; 27.1) | 26.6 (25.2; 28.0)    | 26.0 (24.6; 27.4) | 26.0 (24.6; 27.3) | 26.9 (25.6; 28.2) | 25.4 (24.0; 26.8) | 25.2 (24.0; 26.4) | 25.3 (23.8; 26.7) | 25.2 (24.1; 26.4) | 26.3 (25.2; 27.4) | 25.6 (24.5; 26.6) | 24.0 (23.0; 25.1) | -0.12             | 0.092   |  |
| White                  | 24.7 (23.4; 26.0) | 25.2 (23.9; 26.4)    | 24.7 (23.5; 26.0) | 26.7 (25.5; 27.9) | 26.4 (25.2; 27.6) | 25.4 (24.1; 26.6) | 25.9 (24.8; 27.0) | 26.7 (25.4; 27.9) | 26.8 (25.8; 27.9) | 27.1 (26.1; 28.0) | 26.0 (25.1; 27.0) | 25.0 (24.0; 25.9) | 0.08              | 0.424   |  |
| Non-white              | 22.3 (21.0; 23.6) | 24.7 (23.4; 26.0)    | 25.3 (24.0; 26.6) | 24.2 (23.0; 25.5) | 23.8 (22.5; 25.0) | 23.2 (21.9; 24.5) | 21.1 (20.0; 22.1) | 23.3 (22.0; 24.6) | 23.2 (22.2; 24.2) | 23.2 (22.2; 24.2) | 23.0 (22.0; 23.9) | 22.5 (21.5; 23.4) | -0.11             | 0.357   |  |



**Supplementary table 2: Age-standardized prevalence of diabetes by years of education, sex and skin color, VIGITEL 2007-2018.**

| Sex and skin color (%)  | Survey year (95% CI) |                   |                   |                   |                   |                   |                   |                   |                   |                   |                   |                   | Annual change (%) | p value |
|-------------------------|----------------------|-------------------|-------------------|-------------------|-------------------|-------------------|-------------------|-------------------|-------------------|-------------------|-------------------|-------------------|-------------------|---------|
|                         | 2007                 | 2008              | 2009              | 2010              | 2011              | 2012              | 2013              | 2014              | 2015              | 2016              | 2017              | 2018              |                   |         |
| <b>0-3 years</b>        |                      |                   |                   |                   |                   |                   |                   |                   |                   |                   |                   |                   |                   |         |
| Total                   | 17.2 (15.6; 18.7)    | 18.8 (17.2; 20.4) | 20.3 (18.5; 22.0) | 19.9 (18.2; 21.6) | 20.0 (18.4; 21.6) | 20.0 (18.0; 22.0) | 19.7 (17.8; 21.5) | 23.6 (21.4; 25.9) | 22.1 (20.3; 23.8) | 25.9 (23.9; 28.0) | 22.4 (20.8; 24.1) | 24.4 (22.7; 26.0) | 0.60              | <0.001  |
| Female                  | 18.2 (16.3; 20.1)    | 20.1 (18.1; 22.1) | 21.4 (19.2; 23.6) | 20.8 (18.6; 22.9) | 21.7 (19.8; 23.7) | 21.8 (19.3; 24.3) | 21.7 (19.3; 24.1) | 25.6 (22.7; 28.4) | 23.7 (21.6; 25.9) | 28.1 (25.6; 30.6) | 24.0 (22.0; 26.1) | 25.8 (23.8; 27.9) | 0.67              | <0.001  |
| Male                    | 14.6 (12.3; 16.9)    | 15.6 (13.1; 18.0) | 17.2 (14.3; 20.1) | 17.7 (14.9; 20.4) | 15.3 (12.8; 17.7) | 15.2 (12.0; 18.4) | 14.8 (12.0; 17.5) | 18.6 (15.1; 22.0) | 17.5 (14.8; 20.2) | 20.7 (17.6; 23.8) | 18.5 (15.8; 21.2) | 20.6 (17.9; 23.4) | 0.45              | 0.001   |
| White                   | 15.7 (13.1; 18.4)    | 18.3 (15.4; 21.1) | 20.2 (16.8; 23.6) | 20.3 (16.9; 23.6) | 18.1 (15.6; 20.5) | 18.0 (15.1; 20.9) | 19.4 (16.5; 22.2) | 23.2 (19.8; 26.6) | 22.5 (19.5; 25.5) | 25.2 (22.2; 28.1) | 21.7 (18.9; 24.5) | 21.5 (18.8; 24.2) | 0.55              | 0.014   |
| Non-white               | 17.8 (16.0; 19.7)    | 19.1 (17.2; 21.0) | 20.3 (18.2; 22.3) | 19.7 (17.7; 21.7) | 21.1 (19.1; 23.1) | 21.5 (18.8; 24.3) | 19.9 (17.4; 22.4) | 24.0 (20.9; 27.0) | 21.8 (19.7; 23.9) | 26.6 (23.9; 29.4) | 22.9 (20.8; 24.9) | 25.9 (23.8; 28.0) | 0.62              | <0.001  |
| <b>4-8 years</b>        |                      |                   |                   |                   |                   |                   |                   |                   |                   |                   |                   |                   |                   |         |
| Total                   | 11.5 (10.7; 12.4)    | 12.0 (11.2; 12.9) | 13.5 (12.6; 14.4) | 14.0 (13.1; 14.9) | 14.4 (13.5; 15.3) | 14.6 (13.7; 15.6) | 15.4 (14.5; 16.3) | 16.8 (15.8; 17.9) | 15.8 (15.0; 16.6) | 19.0 (18.0; 20.0) | 17.2 (16.3; 18.0) | 17.7 (16.8; 18.5) | 0.60              | <0.001  |
| Female                  | 12.4 (11.3; 13.5)    | 13.1 (12.0; 14.2) | 13.8 (12.7; 15.0) | 14.7 (13.6; 15.8) | 15.8 (14.7; 17.0) | 15.0 (13.8; 16.3) | 16.0 (14.8; 17.2) | 17.3 (16.0; 18.6) | 16.6 (15.6; 17.7) | 20.2 (18.9; 21.4) | 17.7 (16.6; 18.8) | 18.0 (17.0; 19.1) | 0.58              | <0.001  |
| Male                    | 9.8 (8.7; 11.0)      | 9.8 (8.6; 11.0)   | 12.7 (11.3; 14.1) | 12.5 (11.2; 13.9) | 11.7 (10.5; 12.9) | 13.8 (12.3; 15.3) | 14.1 (12.7; 15.6) | 15.7 (14.1; 17.4) | 14.0 (12.8; 15.2) | 16.7 (15.2; 18.1) | 16.1 (14.7; 17.5) | 16.8 (15.4; 18.2) | 0.63              | <0.001  |
| White                   | 12.3 (10.8; 13.7)    | 12.7 (11.2; 14.2) | 13.9 (12.3; 15.4) | 15.5 (13.9; 17.1) | 15.3 (13.9; 16.8) | 14.1 (12.7; 15.6) | 16.5 (15.0; 17.9) | 17.0 (15.4; 18.5) | 15.8 (14.5; 17.2) | 20.6 (19.1; 22.0) | 17.6 (16.3; 19.0) | 18.3 (16.9; 19.7) | 0.58              | <0.001  |
| Non-white               | 11.1 (10.1; 12.1)    | 11.6 (10.6; 12.6) | 13.3 (12.2; 14.4) | 13.1 (12.1; 14.2) | 13.8 (12.7; 14.9) | 15.0 (13.7; 16.3) | 14.5 (13.3; 15.7) | 16.7 (15.4; 18.1) | 15.7 (14.7; 16.8) | 17.6 (16.4; 18.9) | 16.9 (15.8; 18.0) | 17.3 (16.2; 18.4) | 0.59              | <0.001  |
| <b>9-11 years</b>       |                      |                   |                   |                   |                   |                   |                   |                   |                   |                   |                   |                   |                   |         |
| Total                   | 6.5 (6.0; 7.1)       | 7.1 (6.6; 7.7)    | 7.6 (7.1; 8.2)    | 8.4 (7.9; 9.0)    | 7.8 (7.3; 8.3)    | 8.4 (7.8; 9.0)    | 7.7 (7.2; 8.2)    | 8.9 (8.3; 9.5)    | 8.8 (8.3; 9.3)    | 10.4 (9.8; 10.9)  | 8.9 (8.4; 9.3)    | 8.9 (8.5; 9.4)    | 0.23              | 0.001   |
| Female                  | 6.7 (6.0; 7.4)       | 7.3 (6.5; 8.0)    | 7.8 (7.0; 8.5)    | 8.9 (8.1; 9.6)    | 7.9 (7.2; 8.6)    | 8.6 (7.9; 9.4)    | 7.9 (7.3; 8.6)    | 9.1 (8.3; 9.9)    | 9.4 (8.7; 10.0)   | 11.0 (10.3; 11.7) | 8.9 (8.3; 9.5)    | 9.1 (8.5; 9.7)    | 0.24              | 0.003   |
| Male                    | 6.3 (5.5; 7.0)       | 6.8 (6.0; 7.7)    | 7.4 (6.6; 8.2)    | 7.6 (6.8; 8.4)    | 7.6 (6.8; 8.3)    | 8.0 (7.1; 8.8)    | 7.3 (6.6; 8.1)    | 8.6 (7.7; 9.5)    | 7.7 (7.1; 8.4)    | 9.4 (8.6; 10.1)   | 8.8 (8.1; 9.5)    | 8.6 (7.9; 9.4)    | 0.21              | <0.001  |
| White                   | 6.9 (6.0; 7.8)       | 8.3 (7.3; 9.4)    | 8.0 (7.1; 9.0)    | 9.8 (8.8; 10.8)   | 9.1 (8.2; 10.0)   | 9.3 (8.4; 10.2)   | 8.6 (7.8; 9.5)    | 9.7 (8.8; 10.7)   | 9.5 (8.7; 10.3)   | 11.5 (10.6; 12.4) | 9.8 (9.0; 10.6)   | 9.5 (8.7; 10.3)   | 0.23              | 0.009   |
| Non-white               | 6.3 (5.6; 7.0)       | 6.4 (5.7; 7.0)    | 7.4 (6.7; 8.0)    | 7.6 (6.9; 8.2)    | 6.8 (6.2; 7.5)    | 7.7 (7.0; 8.4)    | 7.0 (6.4; 7.6)    | 8.3 (7.5; 9.0)    | 8.3 (7.7; 8.9)    | 9.6 (8.9; 10.3)   | 8.3 (7.7; 8.8)    | 8.6 (8.0; 9.2)    | 0.23              | <0.001  |
| <b>12 or more years</b> |                      |                   |                   |                   |                   |                   |                   |                   |                   |                   |                   |                   |                   |         |
| Total                   | 5.6 (5.1; 6.2)       | 5.7 (5.1; 6.2)    | 6.6 (6.0; 7.1)    | 6.8 (6.3; 7.4)    | 6.3 (5.7; 6.8)    | 6.2 (5.7; 6.8)    | 5.8 (5.4; 6.2)    | 6.7 (6.2; 7.3)    | 6.4 (6.0; 6.8)    | 8.4 (8.0; 8.9)    | 6.6 (6.2; 7.0)    | 6.4 (6.0; 6.7)    | 0.10              | 0.094   |
| Female                  | 4.7 (4.0; 5.3)       | 4.7 (4.1; 5.3)    | 5.9 (5.1; 6.6)    | 6.5 (5.8; 7.2)    | 5.6 (5.0; 6.2)    | 6.0 (5.3; 6.7)    | 5.4 (4.8; 5.9)    | 6.7 (6.0; 7.5)    | 6.1 (5.6; 6.7)    | 7.9 (7.4; 8.5)    | 6.1 (5.6; 6.6)    | 6.1 (5.6; 6.5)    | 0.15              | 0.028   |
| Male                    | 7.1 (6.2; 8.1)       | 7.2 (6.3; 8.1)    | 7.7 (6.8; 8.6)    | 7.4 (6.6; 8.3)    | 7.4 (6.5; 8.2)    | 6.6 (5.8; 7.5)    | 6.6 (5.9; 7.3)    | 6.7 (5.9; 7.6)    | 6.9 (6.2; 7.5)    | 9.3 (8.5; 10.0)   | 7.6 (6.9; 8.2)    | 6.9 (6.2; 7.5)    | 0.02              | 0.748   |
| White                   | 5.7 (4.9; 6.4)       | 5.6 (4.9; 6.3)    | 6.7 (5.9; 7.5)    | 7.1 (6.4; 7.8)    | 6.7 (6.0; 7.5)    | 6.3 (5.6; 7.0)    | 6.4 (5.8; 7.1)    | 7.3 (6.5; 8.1)    | 7.0 (6.4; 7.6)    | 9.3 (8.6; 9.9)    | 7.2 (6.7; 7.8)    | 6.8 (6.2; 7.3)    | 0.16              | 0.041   |
| Non-white               | 5.6 (4.8; 6.4)       | 5.7 (5.0; 6.5)    | 6.4 (5.6; 7.2)    | 6.5 (5.8; 7.3)    | 5.6 (4.9; 6.3)    | 6.2 (5.4; 6.9)    | 5.0 (4.4; 5.6)    | 6.1 (5.3; 6.8)    | 5.8 (5.2; 6.3)    | 7.4 (6.8; 8.0)    | 6.0 (5.4; 6.5)    | 5.9 (5.3; 6.4)    | 0.03              | 0.447   |

Supplementary table 3: Age-standardized prevalence of smoking by years of education, sex and skin color, VIGITEL 2007-2018.

| Years fo education     |                   | Survey year (95% CI) |                   |                   |                   |                   |                   |                   |                   |                   |                   |                   | Annual change (%) | p value |  |
|------------------------|-------------------|----------------------|-------------------|-------------------|-------------------|-------------------|-------------------|-------------------|-------------------|-------------------|-------------------|-------------------|-------------------|---------|--|
| Sex and skin color (%) | 2007              | 2008                 | 2009              | 2010              | 2011              | 2012              | 2013              | 2014              | 2015              | 2016              | 2017              | 2018              |                   |         |  |
| 0-3 years              |                   |                      |                   |                   |                   |                   |                   |                   |                   |                   |                   |                   |                   |         |  |
| Total                  | 13.0 (11.7; 14.2) | 12.9 (11.6; 14.1)    | 12.6 (11.3; 13.9) | 11.6 (10.4; 12.9) | 12.4 (11.2; 13.6) | 11.0 (9.5; 12.4)  | 11.8 (10.3; 13.3) | 11.7 (10.1; 13.4) | 9.9 (8.7; 11.1)   | 11.8 (10.2; 13.3) | 9.8 (8.6; 11.0)   | 9.0 (7.9; 10.2)   | -0.29             | <0.001  |  |
| Female                 | 10.7 (9.3; 12.1)  | 11.1 (9.7; 12.6)     | 10.9 (9.4; 12.4)  | 10.9 (9.3; 12.4)  | 10.1 (8.8; 11.5)  | 9.5 (7.9; 11.2)   | 9.7 (8.1; 11.4)   | 10.4 (8.4; 12.3)  | 8.3 (7.0; 9.7)    | 10.3 (8.5; 12.1)  | 8.5 (7.0; 9.9)    | 9.0 (7.6; 10.4)   | -0.22             | <0.001  |  |
| Male                   | 18.6 (16.0; 21.2) | 17.4 (15.0; 19.8)    | 17.1 (14.5; 19.6) | 13.6 (11.3; 15.9) | 18.5 (15.9; 21.0) | 14.8 (11.8; 17.8) | 16.7 (13.8; 19.7) | 15.3 (12.1; 18.5) | 14.3 (11.8; 16.8) | 15.3 (12.4; 18.2) | 13.3 (10.9; 15.6) | 9.1 (7.1; 11.1)   | -0.54             | 0.005   |  |
| White                  | 10.4 (8.2; 12.5)  | 9.9 (7.8; 11.9)      | 10.9 (8.5; 13.3)  | 9.7 (7.5; 11.9)   | 11.4 (9.4; 13.3)  | 11.4 (9.0; 13.9)  | 10.2 (8.2; 12.3)  | 10.7 (8.2; 13.1)  | 8.2 (6.3; 10.0)   | 9.4 (7.4; 11.4)   | 8.2 (6.3; 10.0)   | 8.1 (6.2; 10.0)   | -0.21             | 0.013   |  |
| Non-white              | 14.1 (12.6; 15.7) | 14.2 (12.6; 15.7)    | 13.2 (11.6; 14.7) | 12.5 (10.9; 14.0) | 13.0 (11.5; 14.6) | 10.6 (8.8; 12.4)  | 13.1 (11.0; 15.2) | 12.6 (10.3; 14.8) | 10.9 (9.3; 12.4)  | 13.8 (11.6; 16.1) | 10.8 (9.2; 12.3)  | 9.5 (8.1; 11.0)   | -0.28             | 0.004   |  |
| 4-8 years              |                   |                      |                   |                   |                   |                   |                   |                   |                   |                   |                   |                   |                   |         |  |
| Total                  | 14.4 (13.6; 15.1) | 15.0 (14.2; 15.8)    | 14.7 (13.9; 15.5) | 14.3 (13.5; 15.1) | 13.6 (12.9; 14.4) | 13.5 (12.6; 14.4) | 11.4 (10.7; 12.2) | 11.7 (10.8; 12.5) | 10.4 (9.7; 11.1)  | 10.8 (10.1; 11.6) | 10.0 (9.3; 10.7)  | 10.8 (10.1; 11.5) | -0.47             | <0.001  |  |
| Female                 | 11.6 (10.6; 12.5) | 12.6 (11.7; 13.6)    | 12.7 (11.7; 13.6) | 12.2 (11.3; 13.2) | 10.9 (10.0; 11.8) | 11.3 (10.2; 12.3) | 9.5 (8.6; 10.4)   | 9.9 (8.9; 10.8)   | 8.8 (8.0; 9.6)    | 8.7 (7.8; 9.6)    | 8.0 (7.2; 8.8)    | 9.1 (8.2; 9.9)    | -0.40             | 0.001   |  |
| Male                   | 19.9 (18.5; 21.3) | 19.9 (18.4; 21.3)    | 19.0 (17.6; 20.4) | 18.6 (17.2; 20.0) | 19.0 (17.6; 20.4) | 18.1 (16.6; 19.7) | 15.7 (14.2; 17.1) | 15.7 (14.1; 17.3) | 13.7 (12.5; 15.0) | 15.1 (13.7; 16.5) | 14.2 (12.9; 15.6) | 14.6 (13.2; 16.0) | -0.59             | <0.001  |  |
| White                  | 13.7 (12.4; 15.1) | 13.2 (11.9; 14.5)    | 13.4 (12.0; 14.8) | 12.7 (11.3; 14.0) | 12.7 (11.5; 13.9) | 12.1 (10.8; 13.4) | 10.8 (9.7; 11.9)  | 10.4 (9.2; 11.7)  | 10.5 (9.4; 11.7)  | 10.5 (9.4; 11.6)  | 9.8 (8.7; 11.0)   | 10.0 (8.9; 11.1)  | -0.38             | <0.001  |  |
| Non-white              | 14.7 (13.8; 15.7) | 16.0 (15.0; 17.0)    | 15.4 (14.4; 16.4) | 15.2 (14.2; 16.1) | 14.3 (13.3; 15.3) | 14.6 (13.5; 15.8) | 12.0 (11.0; 13.0) | 12.7 (11.5; 13.8) | 10.3 (9.5; 11.2)  | 11.1 (10.1; 12.1) | 10.1 (9.2; 10.9)  | 11.3 (10.4; 12.3) | -0.54             | <0.001  |  |
| 9-11 years             |                   |                      |                   |                   |                   |                   |                   |                   |                   |                   |                   |                   |                   |         |  |
| Total                  | 12.9 (12.3; 13.6) | 11.4 (10.8; 11.9)    | 11.4 (10.9; 12.0) | 10.8 (10.3; 11.4) | 10.4 (9.9; 10.9)  | 9.5 (8.9; 10.0)   | 8.8 (8.3; 9.3)    | 8.2 (7.7; 8.8)    | 8.0 (7.6; 8.5)    | 7.7 (7.3; 8.2)    | 7.4 (7.0; 7.9)    | 7.3 (6.9; 7.7)    | -0.51             | <0.001  |  |
| Female                 | 11.2 (10.5; 12.0) | 9.6 (8.9; 10.3)      | 9.4 (8.7; 10.1)   | 9.7 (9.1; 10.4)   | 8.9 (8.2; 9.5)    | 8.0 (7.4; 8.7)    | 7.1 (6.5; 7.7)    | 7.1 (6.4; 7.7)    | 6.4 (5.9; 7.0)    | 6.7 (6.1; 7.2)    | 6.1 (5.5; 6.6)    | 5.9 (5.4; 6.4)    | -0.47             | <0.001  |  |
| Male                   | 15.9 (14.9; 16.9) | 14.4 (13.4; 15.3)    | 14.9 (13.9; 15.9) | 12.8 (11.9; 13.7) | 12.9 (12.0; 13.7) | 12.0 (11.1; 13.0) | 11.6 (10.8; 12.5) | 10.2 (9.3; 11.0)  | 10.7 (9.9; 11.5)  | 9.5 (8.7; 10.3)   | 9.7 (8.9; 10.5)   | 9.7 (8.9; 10.5)   | -0.58             | <0.001  |  |
| White                  | 13.3 (12.3; 14.3) | 12.1 (11.1; 13.1)    | 12.2 (11.3; 13.2) | 12.4 (11.4; 13.3) | 11.3 (10.4; 12.2) | 10.9 (10.0; 11.9) | 9.6 (8.8; 10.4)   | 9.4 (8.5; 10.3)   | 9.3 (8.5; 10.1)   | 8.6 (7.8; 9.3)    | 8.8 (8.0; 9.6)    | 8.5 (7.7; 9.3)    | -0.46             | <0.001  |  |
| Non-white              | 12.7 (11.9; 13.4) | 10.9 (10.2; 11.6)    | 10.9 (10.2; 11.6) | 9.8 (9.2; 10.5)   | 9.8 (9.1; 10.4)   | 8.4 (7.7; 9.0)    | 8.2 (7.6; 8.8)    | 7.4 (6.7; 8.1)    | 7.3 (6.8; 7.8)    | 7.2 (6.6; 7.8)    | 6.6 (6.1; 7.1)    | 6.5 (6.0; 7.1)    | -0.54             | <0.001  |  |
| 12 or more years       |                   |                      |                   |                   |                   |                   |                   |                   |                   |                   |                   |                   |                   |         |  |
| Total                  | 11.8 (11.1; 12.4) | 10.7 (10.0; 11.3)    | 9.9 (9.3; 10.5)   | 9.1 (8.6; 9.7)    | 9.1 (8.5; 9.6)    | 8.0 (7.4; 8.6)    | 6.8 (6.3; 7.2)    | 6.8 (6.3; 7.4)    | 6.6 (6.2; 7.0)    | 6.3 (5.9; 6.7)    | 6.2 (5.8; 6.6)    | 5.6 (5.2; 5.9)    | -0.55             | <0.001  |  |
| Female                 | 10.1 (9.3; 10.9)  | 9.4 (8.6; 10.2)      | 9.1 (8.4; 9.9)    | 8.1 (7.4; 8.8)    | 8.2 (7.5; 8.9)    | 6.8 (6.1; 7.6)    | 6.0 (5.4; 6.5)    | 6.1 (5.4; 6.8)    | 5.6 (5.1; 6.1)    | 5.0 (4.5; 5.5)    | 5.2 (4.7; 5.7)    | 4.5 (4.1; 5.0)    | -0.51             | <0.001  |  |
| Male                   | 14.3 (13.3; 15.4) | 12.7 (11.6; 13.7)    | 11.2 (10.2; 12.1) | 10.9 (9.9; 11.8)  | 10.5 (9.6; 11.4)  | 10.0 (9.1; 11.0)  | 8.2 (7.4; 8.9)    | 8.1 (7.2; 9.1)    | 8.2 (7.4; 8.9)    | 8.5 (7.8; 9.2)    | 7.9 (7.2; 8.6)    | 7.3 (6.7; 8.0)    | -0.60             | <0.001  |  |
| White                  | 12.3 (11.4; 13.1) | 12.0 (11.1; 12.9)    | 11.4 (10.5; 12.2) | 10.3 (9.5; 11.1)  | 10.0 (9.3; 10.8)  | 9.4 (8.5; 10.2)   | 7.8 (7.1; 8.5)    | 8.7 (7.8; 9.5)    | 8.0 (7.3; 8.6)    | 7.2 (6.6; 7.8)    | 7.4 (6.8; 8.0)    | 6.6 (6.1; 7.2)    | -0.52             | <0.001  |  |
| Non-white              | 11.1 (10.2; 12.1) | 9.0 (8.2; 9.8)       | 8.1 (7.4; 8.9)    | 7.7 (6.9; 8.4)    | 7.7 (6.9; 8.5)    | 6.2 (5.5; 7.0)    | 5.5 (4.9; 6.0)    | 4.6 (4.0; 5.3)    | 4.9 (4.4; 5.5)    | 5.2 (4.7; 5.7)    | 4.8 (4.3; 5.3)    | 4.4 (3.9; 4.9)    | -0.58             | <0.001  |  |

**Supplementary table 4: Age-standardized prevalence of obesity by years of education, sex and skin color, VIGITEL 2007-2018.**

| Years fo education | Survey year (95% CI)   |                   |                   |                   |                   |                   |                   |                   |                   |                   |                   |                   | Annual change (%) | p value |
|--------------------|------------------------|-------------------|-------------------|-------------------|-------------------|-------------------|-------------------|-------------------|-------------------|-------------------|-------------------|-------------------|-------------------|---------|
|                    | Sex and skin color (%) | 2007              | 2008              | 2009              | 2010              | 2011              | 2012              | 2013              | 2014              | 2015              | 2016              | 2017              |                   |         |
| 0-3 years          |                        |                   |                   |                   |                   |                   |                   |                   |                   |                   |                   |                   |                   |         |
| Total              | 21.3 (19.6; 22.9)      | 23.2 (21.5; 24.9) | 22.7 (21.0; 24.5) | 22.7 (20.9; 24.4) | 24.1 (22.4; 25.7) | 25.6 (23.4; 27.7) | 23.5 (21.5; 25.4) | 26.5 (24.2; 28.8) | 26.8 (24.9; 28.6) | 27.6 (25.6; 29.6) | 27.1 (25.3; 28.9) | 28.4 (26.7; 30.2) | 0.60              | <0.001  |
| Female             | 23.8 (21.7; 25.8)      | 26.8 (24.7; 28.9) | 25.2 (23.0; 27.4) | 25.3 (23.2; 27.5) | 27.1 (25.1; 29.2) | 28.9 (26.1; 31.6) | 26.2 (23.7; 28.7) | 29.6 (26.7; 32.5) | 29.4 (27.2; 31.7) | 30.3 (27.7; 32.8) | 29.6 (27.4; 31.9) | 31.2 (29.1; 33.4) | 0.57              | <0.001  |
| Male               | 15.0 (12.7; 17.3)      | 14.1 (11.8; 16.3) | 16.2 (13.6; 18.9) | 15.9 (13.4; 18.4) | 16.0 (13.5; 18.4) | 16.8 (13.6; 19.9) | 17.0 (14.1; 19.8) | 18.4 (15.0; 21.7) | 19.5 (16.7; 22.3) | 21.2 (18.1; 24.3) | 20.8 (18.0; 23.6) | 21.1 (18.4; 23.8) | 0.65              | <0.001  |
| White              | 20.5 (17.6; 23.4)      | 23.3 (20.1; 26.4) | 20.3 (17.0; 23.6) | 21.4 (18.3; 24.6) | 24.6 (21.8; 27.4) | 24.5 (21.1; 27.9) | 24.3 (21.2; 27.4) | 26.3 (22.8; 29.9) | 25.9 (22.8; 29.0) | 28.2 (25.1; 31.2) | 26.7 (23.7; 29.7) | 26.6 (23.7; 29.6) | 0.64              | <0.001  |
| Non-white          | 21.6 (19.7; 23.6)      | 23.2 (21.2; 25.2) | 23.7 (21.6; 25.8) | 23.2 (21.2; 25.3) | 23.8 (21.8; 25.8) | 26.3 (23.5; 29.2) | 22.8 (20.3; 25.4) | 26.6 (23.6; 29.7) | 27.2 (25.0; 29.5) | 27.1 (24.4; 29.8) | 27.4 (25.1; 29.6) | 29.4 (27.2; 31.6) | 0.58              | <0.001  |
| 4-8 years          |                        |                   |                   |                   |                   |                   |                   |                   |                   |                   |                   |                   |                   |         |
| Total              | 17.0 (16.2; 17.9)      | 18.7 (17.7; 19.6) | 19.3 (18.4; 20.3) | 20.2 (19.3; 21.1) | 20.6 (19.7; 21.6) | 22.0 (20.9; 23.1) | 22.4 (21.4; 23.4) | 22.8 (21.7; 23.9) | 23.9 (22.9; 24.8) | 24.6 (23.6; 25.6) | 23.9 (22.9; 24.8) | 24.5 (23.6; 25.5) | 0.67              | <0.001  |
| Female             | 17.9 (16.7; 19.0)      | 20.4 (19.2; 21.7) | 20.5 (19.2; 21.7) | 21.3 (20.1; 22.5) | 22.1 (20.8; 23.3) | 23.8 (22.3; 25.2) | 23.6 (22.3; 24.9) | 24.7 (23.3; 26.2) | 25.7 (24.5; 26.9) | 25.9 (24.5; 27.2) | 24.5 (23.3; 25.7) | 26.4 (25.1; 27.6) | 0.70              | <0.001  |
| Male               | 15.4 (14.1; 16.7)      | 15.0 (13.7; 16.2) | 16.9 (15.4; 18.3) | 17.9 (16.5; 19.2) | 17.8 (16.5; 19.1) | 18.3 (16.8; 19.9) | 19.8 (18.3; 21.4) | 18.6 (16.9; 20.3) | 20.2 (18.8; 21.6) | 22.0 (20.4; 23.6) | 22.5 (20.9; 24.1) | 20.5 (19.0; 22.0) | 0.62              | <0.001  |
| White              | 16.7 (15.1; 18.2)      | 19.3 (17.6; 21.0) | 19.4 (17.7; 21.1) | 20.4 (18.7; 22.1) | 20.3 (18.8; 21.8) | 22.0 (20.3; 23.7) | 21.9 (20.4; 23.5) | 22.8 (21.0; 24.5) | 23.8 (22.2; 25.4) | 24.6 (23.0; 26.1) | 23.5 (21.9; 25.0) | 24.4 (22.9; 26.0) | 0.65              | <0.001  |
| Non-white          | 17.3 (16.2; 18.3)      | 18.3 (17.2; 19.5) | 19.3 (18.1; 20.4) | 20.1 (19.0; 21.2) | 20.8 (19.7; 22.0) | 22.0 (20.6; 23.4) | 22.9 (21.5; 24.2) | 22.8 (21.4; 24.3) | 24.0 (22.8; 25.1) | 24.6 (23.2; 26.0) | 24.1 (22.9; 25.4) | 24.6 (23.4; 25.9) | 0.68              | <0.001  |
| 9-11 years         |                        |                   |                   |                   |                   |                   |                   |                   |                   |                   |                   |                   |                   |         |
| Total              | 12.8 (12.2; 13.4)      | 13.9 (13.2; 14.5) | 14.4 (13.8; 15.1) | 16.0 (15.3; 16.6) | 16.5 (15.9; 17.1) | 17.4 (16.7; 18.1) | 17.5 (16.8; 18.1) | 18.5 (17.8; 19.3) | 18.7 (18.1; 19.3) | 19.1 (18.4; 19.8) | 18.5 (17.9; 19.2) | 19.6 (18.9; 20.2) | 0.60              | <0.001  |
| Female             | 12.2 (11.3; 13.0)      | 13.5 (12.6; 14.3) | 14.2 (13.4; 15.1) | 15.6 (14.8; 16.5) | 16.2 (15.3; 17.0) | 17.5 (16.6; 18.4) | 17.2 (16.3; 18.0) | 18.8 (17.8; 19.8) | 19.1 (18.3; 19.9) | 19.3 (18.5; 20.2) | 18.6 (17.7; 19.4) | 19.9 (19.0; 20.7) | 0.68              | <0.001  |
| Male               | 14.0 (13.1; 14.9)      | 14.5 (13.6; 15.4) | 14.8 (13.8; 15.7) | 16.6 (15.6; 17.6) | 17.0 (16.0; 17.9) | 17.2 (16.2; 18.3) | 17.9 (16.9; 18.9) | 18.1 (17.0; 19.2) | 18.0 (17.0; 18.9) | 18.7 (17.7; 19.7) | 18.5 (17.4; 19.5) | 19.0 (18.0; 20.1) | 0.46              | <0.001  |
| White              | 12.8 (11.7; 13.8)      | 14.0 (12.9; 15.1) | 14.3 (13.2; 15.3) | 15.8 (14.7; 16.9) | 16.9 (15.8; 18.0) | 18.1 (16.9; 19.2) | 16.9 (15.9; 18.0) | 18.5 (17.3; 19.7) | 18.1 (17.1; 19.2) | 18.4 (17.4; 19.5) | 17.6 (16.6; 18.6) | 18.9 (17.8; 20.0) | 0.52              | 0.001   |
| Non-white          | 12.9 (12.1; 13.6)      | 13.8 (13.0; 14.6) | 14.5 (13.8; 15.3) | 16.1 (15.3; 16.9) | 16.2 (15.4; 17.0) | 16.9 (16.0; 17.8) | 17.9 (17.0; 18.7) | 18.6 (17.6; 19.5) | 19.0 (18.2; 19.8) | 19.6 (18.7; 20.4) | 19.1 (18.3; 19.9) | 20.0 (19.1; 20.8) | 0.64              | <0.001  |
| 12 or more years   |                        |                   |                   |                   |                   |                   |                   |                   |                   |                   |                   |                   |                   |         |
| Total              | 11.6 (11.0; 12.3)      | 11.5 (10.9; 12.1) | 12.8 (12.1; 13.4) | 13.3 (12.7; 13.9) | 14.7 (14.1; 15.4) | 14.9 (14.2; 15.6) | 15.2 (14.6; 15.8) | 15.0 (14.2; 15.7) | 15.1 (14.6; 15.7) | 15.6 (15.1; 16.2) | 16.1 (15.5; 16.7) | 16.8 (16.2; 17.4) | 0.46              | <0.001  |
| Female             | 9.4 (8.6; 10.2)        | 9.4 (8.6; 10.1)   | 11.3 (10.5; 12.2) | 12.0 (11.2; 12.8) | 13.0 (12.1; 13.8) | 13.7 (12.8; 14.6) | 12.7 (12.0; 13.5) | 13.5 (12.6; 14.4) | 13.5 (12.8; 14.2) | 13.8 (13.1; 14.5) | 14.3 (13.6; 15.0) | 15.1 (14.3; 15.8) | 0.48              | <0.001  |
| Male               | 15.1 (14.0; 16.1)      | 14.9 (13.8; 16.0) | 15.0 (14.0; 16.1) | 15.6 (14.6; 16.6) | 17.6 (16.6; 18.7) | 17.0 (15.9; 18.1) | 19.5 (18.4; 20.5) | 17.5 (16.3; 18.7) | 17.8 (16.8; 18.8) | 18.6 (17.6; 19.6) | 19.2 (18.2; 20.1) | 19.7 (18.7; 20.7) | 0.45              | <0.001  |
| White              | 11.2 (10.4; 12.1)      | 11.1 (10.3; 12.0) | 12.2 (11.3; 13.1) | 12.8 (12.0; 13.7) | 14.1 (13.2; 15.0) | 14.4 (13.5; 15.4) | 14.9 (14.1; 15.7) | 14.5 (13.5; 15.5) | 14.7 (13.9; 15.5) | 15.1 (14.3; 15.8) | 14.9 (14.1; 15.7) | 16.1 (15.3; 16.9) | 0.43              | <0.001  |
| Non-white          | 12.2 (11.2; 13.2)      | 12.0 (11.1; 12.9) | 13.5 (12.5; 14.5) | 13.9 (13.0; 14.8) | 15.5 (14.5; 16.5) | 15.5 (14.4; 16.5) | 15.6 (14.7; 16.5) | 15.5 (14.5; 16.6) | 15.6 (14.8; 16.4) | 16.3 (15.5; 17.2) | 17.4 (16.6; 18.3) | 17.6 (16.7; 18.4) | 0.48              | <0.001  |

1  
2  
3  
4  
5  
6  
7  
8  
9  
10  
11  
12  
13  
14  
15  
16  
17  
18  
19  
20  
21  
22  
23  
24  
25  
26  
27  
28  
29  
30  
31  
32  
33  
34  
35  
36  
37  
38  
39  
40  
41  
42  
43  
44  
45  
46  
47  
48  
49  
50  
51  
52  
53  
54  
55  
56  
57  
58  
59  
60STROBE Statement—Checklist of items that should be included in reports of *cross-sectional studies*

|                              | Item No | Recommendation                                                                                                                                                                                                                                                                                                                                                                                                                                                      |
|------------------------------|---------|---------------------------------------------------------------------------------------------------------------------------------------------------------------------------------------------------------------------------------------------------------------------------------------------------------------------------------------------------------------------------------------------------------------------------------------------------------------------|
| <b>Title and abstract</b>    | 1       | Indicate the study's design with a commonly used term in the title or the abstract<br><a href="#">Page 2</a><br>(b) Provide in the abstract an informative and balanced summary of what was done and what was found <a href="#">Page 2</a>                                                                                                                                                                                                                          |
| <b>Introduction</b>          |         |                                                                                                                                                                                                                                                                                                                                                                                                                                                                     |
| Background/rationale         | 2       | Explain the scientific background and rationale for the investigation being reported<br><a href="#">Page 3</a>                                                                                                                                                                                                                                                                                                                                                      |
| Objectives                   | 3       | State specific objectives, including any prespecified hypotheses<br><a href="#">Page 3</a>                                                                                                                                                                                                                                                                                                                                                                          |
| <b>Methods</b>               |         |                                                                                                                                                                                                                                                                                                                                                                                                                                                                     |
| Study design                 | 4       | Present key elements of study design early in the paper<br><a href="#">Page 4</a>                                                                                                                                                                                                                                                                                                                                                                                   |
| Setting                      | 5       | Describe the setting, locations, and relevant dates, including periods of recruitment, exposure, follow-up, and data collection<br><a href="#">Page 4</a>                                                                                                                                                                                                                                                                                                           |
| Participants                 | 6       | Give the eligibility criteria, and the sources and methods of selection of participants<br><a href="#">Page 4</a>                                                                                                                                                                                                                                                                                                                                                   |
| Variables                    | 7       | Clearly define all outcomes, exposures, predictors, potential confounders, and effect modifiers. Give diagnostic criteria, if applicable<br><a href="#">Pages 4-5</a>                                                                                                                                                                                                                                                                                               |
| Data sources/<br>measurement | 8*      | For each variable of interest, give sources of data and details of methods of assessment (measurement). Describe comparability of assessment methods if there is more than one group <a href="#">Pages 4-5</a>                                                                                                                                                                                                                                                      |
| Bias                         | 9       | Describe any efforts to address potential sources of bias <a href="#">pages 4-5</a>                                                                                                                                                                                                                                                                                                                                                                                 |
| Study size                   | 10      | Explain how the study size was arrived at <a href="#">page 4</a>                                                                                                                                                                                                                                                                                                                                                                                                    |
| Quantitative variables       | 11      | Explain how quantitative variables were handled in the analyses. If applicable, describe which groupings were chosen and why <a href="#">Page 5</a>                                                                                                                                                                                                                                                                                                                 |
| Statistical methods          | 12      | (a) Describe all statistical methods, including those used to control for confounding<br><a href="#">Page 5</a><br>(b) Describe any methods used to examine subgroups and interactions <a href="#">Page 5</a><br>(c) Explain how missing data were addressed <a href="#">Page 5</a><br>(d) If applicable, describe analytical methods taking account of sampling strategy<br><a href="#">Page 5</a><br>(e) Describe any sensitivity analyses <a href="#">Page 5</a> |
| <b>Results</b>               |         |                                                                                                                                                                                                                                                                                                                                                                                                                                                                     |
| Participants                 | 13*     | (a) Report numbers of individuals at each stage of study—eg numbers potentially eligible, examined for eligibility, confirmed eligible, included in the study, completing follow-up, and analysed <a href="#">Page 4</a><br>(b) Give reasons for non-participation at each stage <a href="#">Page 4</a><br>(c) Consider use of a flow diagram <a href="#">NA</a>                                                                                                    |
| Descriptive data             | 14*     | (a) Give characteristics of study participants (eg demographic, clinical, social) and information on exposures and potential confounders <a href="#">Table 1</a><br>(b) Indicate number of participants with missing data for each variable of interest                                                                                                                                                                                                             |

|                          |     |                                                                                                                                                                                                                                                                                                                                                                                                                                                                                              |
|--------------------------|-----|----------------------------------------------------------------------------------------------------------------------------------------------------------------------------------------------------------------------------------------------------------------------------------------------------------------------------------------------------------------------------------------------------------------------------------------------------------------------------------------------|
|                          |     | <a href="#">page 4</a>                                                                                                                                                                                                                                                                                                                                                                                                                                                                       |
| Outcome data             | 15* | Report numbers of outcome events or summary measures <a href="#">Table 1</a>                                                                                                                                                                                                                                                                                                                                                                                                                 |
| Main results             | 16  | (a) Give unadjusted estimates and, if applicable, confounder-adjusted estimates and their precision (eg, 95% confidence interval). Make clear which confounders were adjusted for and why they were included <a href="#">Figures 1, 2 and 3</a><br>(b) Report category boundaries when continuous variables were categorized <a href="#">NA</a><br>(c) If relevant, consider translating estimates of relative risk into absolute risk for a meaningful time period <a href="#">Figure 1</a> |
| Other analyses           | 17  | Report other analyses done—eg analyses of subgroups and interactions, and sensitivity analyses <a href="#">Figures 2 and 3</a>                                                                                                                                                                                                                                                                                                                                                               |
| <b>Discussion</b>        |     |                                                                                                                                                                                                                                                                                                                                                                                                                                                                                              |
| Key results              | 18  | Summarise key results with reference to study objectives <a href="#">Page 8</a>                                                                                                                                                                                                                                                                                                                                                                                                              |
| Limitations              | 19  | Discuss limitations of the study, taking into account sources of potential bias or imprecision. Discuss both direction and magnitude of any potential bias<br><a href="#">Page 11</a>                                                                                                                                                                                                                                                                                                        |
| Interpretation           | 20  | Give a cautious overall interpretation of results considering objectives, limitations, multiplicity of analyses, results from similar studies, and other relevant evidence<br><a href="#">Page 11</a>                                                                                                                                                                                                                                                                                        |
| Generalisability         | 21  | Discuss the generalisability (external validity) of the study results <a href="#">Page 11</a>                                                                                                                                                                                                                                                                                                                                                                                                |
| <b>Other information</b> |     |                                                                                                                                                                                                                                                                                                                                                                                                                                                                                              |
| Funding                  | 22  | Give the source of funding and the role of the funders for the present study and, if applicable, for the original study on which the present article is based <a href="#">page 6</a>                                                                                                                                                                                                                                                                                                         |

\*Give information separately for exposed and unexposed groups.

**Note:** An Explanation and Elaboration article discusses each checklist item and gives methodological background and published examples of transparent reporting. The STROBE checklist is best used in conjunction with this article (freely available on the Web sites of PLoS Medicine at <http://www.plosmedicine.org/>, Annals of Internal Medicine at <http://www.annals.org/>, and Epidemiology at <http://www.epidem.com/>). Information on the STROBE Initiative is available at [www.strobe-statement.org](http://www.strobe-statement.org).

# BMJ Open

## EDUCATIONAL DISPARITIES IN HYPERTENSION, DIABETES, OBESITY AND SMOKING IN BRAZIL: A TREND ANALYSIS OF 578,977 ADULTS FROM A NATIONAL SURVEY, 2007 TO 2018.

|                                 |                                                                                                                                                                                                                                                                                                                                                                                                                                                                                                                                                |
|---------------------------------|------------------------------------------------------------------------------------------------------------------------------------------------------------------------------------------------------------------------------------------------------------------------------------------------------------------------------------------------------------------------------------------------------------------------------------------------------------------------------------------------------------------------------------------------|
| Journal:                        | <i>BMJ Open</i>                                                                                                                                                                                                                                                                                                                                                                                                                                                                                                                                |
| Manuscript ID                   | bmjopen-2020-046154.R2                                                                                                                                                                                                                                                                                                                                                                                                                                                                                                                         |
| Article Type:                   | Original research                                                                                                                                                                                                                                                                                                                                                                                                                                                                                                                              |
| Date Submitted by the Author:   | 03-May-2021                                                                                                                                                                                                                                                                                                                                                                                                                                                                                                                                    |
| Complete List of Authors:       | Toteff Dulgheroff, Pedro; Universidade Federal de Uberlandia, Faculdade de Medicina<br>da Silva, Luciana; Universidade Federal de Uberlandia, Faculdade de Medicina<br>Madalena Rinaldi, Ana Elisa; Universidade Federal de Uberlandia, Faculdade de Medicina<br>Rezende, Leandro; Universidade Federal de Sao Paulo, Medicina Preventiva<br>Souza Marques, Emanuele; Universidade do Estado do Rio de Janeiro, Instituto de Medicina Social<br>Azeredo, Catarina; Universidade Federal de Uberlandia - Campus Umuarama, Faculdade de Medicina |
| <b>Primary Subject Heading</b>: | Global health                                                                                                                                                                                                                                                                                                                                                                                                                                                                                                                                  |
| Secondary Subject Heading:      | Cardiovascular medicine, Diabetes and endocrinology, Epidemiology, Smoking and tobacco, Nutrition and metabolism                                                                                                                                                                                                                                                                                                                                                                                                                               |
| Keywords:                       | General diabetes < DIABETES & ENDOCRINOLOGY, Hypertension < CARDIOLOGY, EPIDEMIOLOGY, PUBLIC HEALTH, SOCIAL MEDICINE                                                                                                                                                                                                                                                                                                                                                                                                                           |
|                                 |                                                                                                                                                                                                                                                                                                                                                                                                                                                                                                                                                |

SCHOLARONE™  
Manuscripts



I, the Submitting Author has the right to grant and does grant on behalf of all authors of the Work (as defined in the below author licence), an exclusive licence and/or a non-exclusive licence for contributions from authors who are: i) UK Crown employees; ii) where BMJ has agreed a CC-BY licence shall apply, and/or iii) in accordance with the terms applicable for US Federal Government officers or employees acting as part of their official duties; on a worldwide, perpetual, irrevocable, royalty-free basis to BMJ Publishing Group Ltd ("BMJ") its licensees and where the relevant Journal is co-owned by BMJ to the co-owners of the Journal, to publish the Work in this journal and any other BMJ products and to exploit all rights, as set out in our [licence](#).

The Submitting Author accepts and understands that any supply made under these terms is made by BMJ to the Submitting Author unless you are acting as an employee on behalf of your employer or a postgraduate student of an affiliated institution which is paying any applicable article publishing charge ("APC") for Open Access articles. Where the Submitting Author wishes to make the Work available on an Open Access basis (and intends to pay the relevant APC), the terms of reuse of such Open Access shall be governed by a Creative Commons licence – details of these licences and which [Creative Commons](#) licence will apply to this Work are set out in our licence referred to above.

Other than as permitted in any relevant BMJ Author's Self Archiving Policies, I confirm this Work has not been accepted for publication elsewhere, is not being considered for publication elsewhere and does not duplicate material already published. I confirm all authors consent to publication of this Work and authorise the granting of this licence.

**EDUCATIONAL DISPARITIES IN HYPERTENSION, DIABETES, OBESITY AND  
SMOKING IN BRAZIL: A TREND ANALYSIS OF 578,977 ADULTS FROM A  
NATIONAL SURVEY, 2007 TO 2018.**

**Authors:**

Pedro Toteff Dulgheroff<sup>1</sup>, Luciana Saraiva da Silva<sup>1,2</sup>, Ana Elisa Madalena Rinaldi<sup>2</sup>, Leandro F. M. Rezende<sup>3</sup>, Emanuele Souza Marques<sup>4</sup>, Catarina Machado Azeredo<sup>1,2</sup>

1. Programa de Pós-graduação em Saúde da Família, Faculdade de Medicina, Universidade Federal de Uberlândia.
2. Curso de Nutrição, Faculdade de Medicina, Universidade Federal de Uberlândia.
3. Departamento de Medicina Preventiva, Escola Paulista de Medicina, Universidade Federal de São Paulo, São Paulo, Brazil.
4. Instituto de Medicina Social, Universidade do Estado do Rio de Janeiro, Rio de Janeiro, Brazil.

**Corresponding Author:**

Catarina Machado Azeredo

Address: Av Pará, 1720, Bloco 2 U, bairro Umuarama, Uberlândia, Minas Gerais. Cep 38.405-320

E-mail: [catarina.azeredo@yahoo.com.br](mailto:catarina.azeredo@yahoo.com.br)

Telephone: +55 (34) 3225-8584

Fax: +55 (34) 3232-8620



1  
2  
3  
4 **EDUCATIONAL DISPARITIES IN HYPERTENSION, DIABETES, OBESITY AND**  
5 **SMOKING IN BRAZIL: A TREND ANALYSIS OF 578,977 ADULTS FROM A**  
6 **NATIONAL SURVEY, 2007 TO 2018.**  
7  
8  
9

10  
11  
12  
13 **ABSTRACT**  
14

15  
16 **Objectives:** Our study aimed to assess social inequality trends for hypertension, diabetes  
17 mellitus, smoking and obesity from 2007 to 2018 in adults from Brazilian capitals.

18  
19 **Setting:** Data from the VIGITEL study, a cross-sectional telephone survey conducted annually  
20 from 2007 to 2018.  
21  
22

23 **Participants:** We used data from 578,977 Brazilian adults ( $\geq 18$  years).  
24

25 **Design:** Cross-sectional surveys conducted annually from 2007 to 2018.  
26

27 **Primary outcome measures:** Participants responded to a questionnaire about medical  
28 diagnosis of hypertension and diabetes, smoking status, weight and height. Educational  
29 inequalities (0-3, 4-8, 9-11 and 12 or more years of study) by sex and skin color were assessed  
30 through absolute (slope index of inequality – SII) and relative measures of inequality  
31 (concentration index – CIX), and trends were tested by Prais-Winsten.  
32  
33

34 **Results:** All outcomes were more prevalent in the least educated. The largest absolute  
35 educational inequality was observed for hypertension ( $SII_{total} = -37.8$  in 2018). During 2007-  
36 2018, the total educational disparity remained constant for hypertension, increased for diabetes  
37 and smoking, and decreased for obesity. Overall, inequality was higher among women and non-  
38 whites, compared to men and whites. We found a reduction in absolute inequality for  
39 hypertension among non-whites, an increase for diabetes in all strata, and an increase for  
40 smoking in women and non-whites. The relative inequality decreased in women and whites and  
41 increased for smoking in all strata, except among men.  
42  
43

44 **Conclusion:** The educational inequality reduced for obesity, remained constant for  
45 hypertension and increased for diabetes and smoking from 2007 to 2018 in Brazilian adults.  
46  
47  
48

49 **Funding:** Brazilian National Council of Scientific and Technological Development (CNPq),  
50 404905/2016-1.  
51  
52  
53

54 **Keywords:** Inequality, Hypertension, Diabetes, Smoking, Obesity, Adults.  
55  
56  
57  
58  
59  
60

### Strengths and limitations of this study

- We assessed the extent and trend of socioeconomic inequalities in major non-communicable diseases (hypertension and diabetes) and its risk factors (smoking and obesity) over 12 years in a middle-income country;
- We used large samples from Brazilian adults living in the 27 state Capitals in Brazil;
- We assessed educational inequalities in total sample and in subgroups of sex and race/skin color using complex measures of inequality.
- Using data from a telephone Survey (VIGITEL) limited our generalizability to those with landlines.
- The use of self-reported diseases may have affected our results underestimating inequality in hypertension and diabetes, as it may have underestimated the prevalence among least favored groups.

## INTRODUCTION

Non-communicable diseases (NCD) are the main cause of death in Brazil<sup>1</sup> and worldwide<sup>2</sup>. According to the Global Burden of Diseases, Injuries, and Risk Factors Study, in 2017, the four main risk factors for mortality and years of life lost due to disability in Brazil were systemic arterial hypertension, diabetes *mellitus*, obesity and smoking<sup>3</sup>. Importantly, these risk factors affect the less economically favored groups in a more pronounced way<sup>4-6</sup>, in addition to reinforcing poverty and income inequality by generating an increase in direct and indirect spending and loss of productivity<sup>7</sup>. A synthesis of 283 studies in low- and middle-income countries showed a positive association between low income, low socioeconomic status and low educational level with the occurrence of NCD<sup>8</sup>. In Brazil, adults with less education, non-whites and without health insurance had a higher prevalence of risk factors for NCD, such as smoking, leisure time physical inactivity, and lower consumption of fruits and vegetables<sup>9</sup>.

Trend analysis of the risk factors for NCD in Brazil showed that the prevalence of hypertension remained stable between 2006 and 2018, while diabetes and obesity grew and smoking dropped<sup>10</sup>. However, this trend did not occur homogeneously among social strata. Between 1998 and 2013, there was a reduction in educational inequalities for hypertension and coronary heart disease and an increase in inequality for diabetes in Brazilian adults<sup>5</sup>.

A sustained reduction in health inequities between countries is necessary<sup>8</sup>. However, trend studies on social inequality in the different risk factors for NCD that are essential for health planning are scarce in Brazil<sup>5</sup>, especially assessing risk factors concomitantly and based on educational disparities, also considering sex and color strata. Therefore, our aim was to assess social inequality trends for hypertension, diabetes, smoking and obesity among adults from Brazilian state capitals, from 2007 to 2018. We also performed subgroup analysis for education inequalities by skin color and sex.

## METHODS

### Study design and source of data and sample

This study used data collected by the Surveillance of Risk and Protection Factors for Chronic Diseases by Telephone Survey (VIGITEL), coordinated by the Ministry of Health of Brazil, from 2007 to 2018. VIGITEL is a cross-sectional system for monitoring the health of the adult population – over 18 years old, residing in the Brazilian capitals and the Federal District (DF), and who have a landline telephone – carried out annually since 2006. The sample stratification took place by telephone prefix until 2011, and subsequently by postal code (CEP). In order to reduce selection bias due to the partial coverage of the population by the landline telephone system, VIGITEL assigned a final weight to each individual, considering the inverse of the number of telephone lines in the household interviewed, the number of adults living in the household and the socio-demographic composition of the sample, based on the 2000 and 2010 demographic censuses. This weighting aimed to achieve representativeness for population aged 18 years and over of each state capital in Brazil, including DF in all years<sup>10</sup>, but it cannot be used as a representative sample of the whole country. However, it had limitations previously described<sup>11</sup>.

Data from 625,070 individuals interviewed between 2007 and 2018 were initially obtained. We excluded women who were pregnant and those who had doubts if they were or were not pregnant by the time of the interview (5,087 women); people aged 80 or older (22,234 individuals) because aging may affect self-reports<sup>12</sup>; people who did not want to or did not know how to respond to their skin color (20,699 respondents), corresponding to a loss of 46,093 (7.4%) observations compared to the original study. Thus, 578,977 participants were included in this study. During the analysis, there were 2 additional missing for skin color e 3 missing for obesity.

All data of the participants were self-reported. They answered about previous medical diagnosis of hypertension and diabetes (all types), if they were current smokers (yes/no) and their weight and height, used to calculate the Body Mass Index (BMI). We considered  $BMI \geq 30 \text{ kg/m}^2$  for obesity<sup>13</sup>. Risk factors were described according educational level (i.e., years of study number: 0-3, 4-8, 9-11 and 12 or more study years), sex (women and men) and skin color (white and non-white). Skin color also was self-reported and included the categories: white (used for white color) and black, brown, mixed race, yellow (Asian), red (i.e. indigenous) and indigenous (used for non-white skin color).

### Statistical analysis

Prevalence of hypertension, diabetes, smoking and obesity (2007-2018) was age-standardized using the age distribution of the year 2018. We estimated absolute and relative complex measures of inequality, namely the slope index of inequality (SII) and the concentration index (CIX), respectively, and its 95% confidence interval. These measures of inequality are complementary and were calculated according to the World Health Organization<sup>14</sup> and Barros et al.<sup>15</sup>. The SII results from a linear regression of the cumulative population proportional distribution in each one of the four educational groups in this study and represents the absolute difference, in predicted values, on disease prevalence between the least and the most favored person, with no education and the highest possible education, taking into consideration the entire distribution of the stratification variable. The CIX assesses the relative difference between them and shows how concentrated are the diseases towards the least or most favored groups. CIX values should be read with caution because it can overestimate inequalities when the outcome of interest has a low frequency and may not be able to identify important inequalities when the outcome prevalence is high<sup>16</sup>.

The results of SII and CIX were multiplied by 100 to facilitate their visualization in tables and graphs, ranging from -100 to +100. On this scale, CIX values less than -20 or greater

1  
2  
3  
4 than 20 can be considered relevant indicators of inequality<sup>14</sup>. Results equal to zero represent a  
5  
6 situation of total equality. When it is equal +100 or -100, we have the grater inequality possible.  
7  
8 Negative values indicate a higher prevalence of the risk factor in the least educated group, while  
9  
10 positive ones represents grater prevalence in those most educated groups.  
11  
12

13 The different levels of education were used to calculate the total SII and CIX.  
14  
15 Subsequently, the SII and CIX data for educational level schooling were stratified by sex and  
16  
17 skin color. The time trend of the indicators was analyzed using the Prais-Winsten method  
18  
19 modified by Durbin and Watson instead of traditional linear regression to avoid the  
20  
21 autoregressive problem common in this social serial trend analysis<sup>17</sup>. Statistical analyses were  
22  
23 performed using the STATA/SE® 15.1 software.  
24  
25

### 26 27 **Ethical aspects**

28  
29 VIGITEL was approved by the National Research Ethics Commission (CONEP). The  
30  
31 VIGITEL database is in the public domain and does not allow identification of participants. It  
32  
33 is available at the electronic address: <http://svs.aids.gov.br/download/Vigitel/>. The waiver of  
34  
35 ethical review was approved by the Research Ethics Committee of the Federal University of  
36  
37 Uberlândia, Minas Gerais (CAAE: 2,654,271).  
38  
39

### 40 41 **Patient and public involvement**

42  
43 No patients or public were involved in the design, or conduct, or reporting, or  
44  
45 dissemination plans of our research.  
46  
47

## 48 49 50 **RESULTS**

51  
52 From 2007 to 2018, the profile of individuals evaluated remained similar, with a slight  
53  
54 increase ( $p=0.001$ ) in the average of age (from 39.8 to 41.7 years) and similar distribution  
55  
56 between sexes ( $p=0.858$  – 53.2% female) and skin color ( $p=0.154$  – 58.6% non-white) in 2018.  
57  
58 The average number of years of study showed a significant increase in the period, from 9.4 to  
59  
60

1  
2  
3  
4 10.7 years of study ( $p=0.001$ ). The prevalence of hypertension remained constant in the period  
5  
6 (34.1% in 2007 to 33.3% in 2018 –  $p=0.065$ ), with a reduction in smoking (from 13.0% to 7.4%  
7  
8 –  $p=0.001$ ), while the prevalence of diabetes (8.9% to 10.6% –  $p=0.004$ ) and obesity increased  
9  
10 (14.7% to 20.0% –  $p=0.001$ ) (Table 1). Descriptive data stratified by sex and skin color can be  
11  
12 found in Supplementary Table 1.  
13  
14

15  
16 An educational gradient was observed for all four outcomes, with a higher prevalence  
17  
18 among the least educated group. The largest prevalence discrepancy in 2018, between the least  
19  
20 and the most educated groups, was observed for diabetes (24.4% and 6.4%) resulting in a  
21  
22 difference of 18.0 percentage points. The smallest for smoking (9.0% and 5.6%), where the  
23  
24 prevalence difference between groups was 3.4 percentage points. Detailed data can be found in  
25  
26 Figure 1 and Supplementary Tables 2 to 5. For hypertension and obesity, these prevalence  
27  
28 differences were: 60.7% versus 23.8% and 28.4% versus 16.8%, respectively.  
29  
30  
31

32 Hypertension, diabetes, and obesity were more prevalent in women than in men, while  
33  
34 smoking prevalence was higher in men. The prevalence of outcomes was higher in non-whites  
35  
36 compared to whites for hypertension and obesity, and lower for diabetes and smoking.  
37  
38 Supplementary Figures 1 and 2 and Supplementary Tables 2 to 5 show the age-standardized  
39  
40 prevalence of each outcome by years of study and stratified by sex, skin color and education.  
41  
42

43 Table 2 shows the absolute (SII) and relative (CIX) measures of educational inequality  
44  
45 for the four outcomes and also by sex and skin color. Negative SII and CIX values for all  
46  
47 outcomes reaffirm their higher prevalence among least educated group.  
48  
49

50 The absolute and relative educational inequality for hypertension, diabetes and obesity  
51  
52 was, in general, higher among women than men and higher in non-white individuals compared  
53  
54 to whites, represented by negative and higher SII and CIX values (Figures 2, 3 and 4). The  
55  
56 exception was smoking, where SII and CIX were higher in men. Obesity showed higher  
57  
58 absolute and relative inequality among whites (Figure 4). Over the period, absolute and relative  
59  
60

1  
2  
3  
4 inequality remained constant in hypertension (Figure 2;  $p=0.701$  and  $0.658$ , respectively), being  
5  
6 higher in women than in men (Figure 3) and in non-whites in relation to whites (Figure 4). The  
7  
8 absolute inequality in diabetes had a statistically significant increase in all strata (Figures 2, 3  
9  
10 and 4;  $p<0.05$ ). This increase was greater in men than in women, as well as in whites in relation  
11  
12 to non-whites. The relative inequality in diabetes remained constant over the period ( $p=0.350$ ).  
13  
14 The absolute inequality for obesity remained constant ( $p=0.251$ ), although there was a reduction  
15  
16 in the relative inequality for the total sample and between women and non-whites (Figures 2, 3  
17  
18 and 4;  $p=0.010$ ,  $0.009$  and  $0.011$ , respectively). There was an increase in absolute inequality in  
19  
20 smoking between whites ( $p=0.004$ ) and women ( $p=0.025$ ) during the analyzed period. The  
21  
22 relative inequality in smoking increased in all strata ( $p<0.05$ ), except among men, where it  
23  
24 remained constant (Figures 2, 3 and 4).  
25  
26  
27  
28  
29  
30

## 31 **DISCUSSION**

32  
33  
34 In our study, diabetes, hypertension, obesity, and smoking remained more prevalent in  
35  
36 the least educated groups from 2007 to 2018 in Brazil. The absolute and relative educational  
37  
38 inequalities were higher among women and non-whites, compared to men and whites.  
39  
40 Hypertension was the outcome that had the highest absolute educational inequality, which  
41  
42 remained constant in the period; the absolute educational inequality for diabetes increased in  
43  
44 all strata. The absolute educational inequality remained constant for obesity, although the  
45  
46 relative one has reduced for the total sample, among women and non-whites. There was an  
47  
48 increase in the absolute educational inequality for smoking among women and whites and  
49  
50 relative educational inequality for all strata, except for men where it remained constant.  
51  
52  
53

54  
55 Hypertension had higher prevalence ( $33.3\%$  in 2018) and the highest absolute  
56  
57 educational inequality ( $-37.8$  in 2018). The prevalence in the least educated group was  $60.7\%$ .  
58  
59 A study carried out with Brazilian adults found that aging, black skin color, low education,  
60



1  
2  
3  
4 obesity, being a former smoker, self-reported diabetes, high cholesterol and high salt intake  
5 were associated with a higher prevalence of hypertension<sup>18</sup>. In addition to individual factors, a  
6  
7 study conducted with the North American population indicated that states with greater  
8  
9 socioeconomic vulnerability, such as low family income and high percentages of the population  
10  
11 below the poverty line were significantly associated with a high prevalence of self-reported  
12  
13 hypertension<sup>19</sup>, which corroborates with the inequality findings in our study. However,  
14  
15 although we found the highest educational inequality for hypertension, it remained constant in  
16  
17 the period. On the other hand, educational inequality for diabetes increased in this period in all  
18  
19 strata. Diabetes had the highest relative inequity in 2018 (-24.0). Trend analysis of the  
20  
21 prevalence of diabetes, hypertension and heart disease from 1998 to 2013 also found an increase  
22  
23 in diabetes disparities among a representative sample of Brazilian adults<sup>5</sup>. It is possible that  
24  
25 strategies such as the Brazilian National Policy for the Comprehensive Health of the Black  
26  
27 Population<sup>20</sup>, could have contributed to reduce race inequality by decreasing the prevalence of  
28  
29 hypertension among non-whites. However, if this is true, we would expect to find a reduction  
30  
31 in race inequality for diabetes. There are several potential explanations for the increase in  
32  
33 educational inequalities for diabetes. This could have been partially driven by our finding of an  
34  
35 increase in obesity prevalence over time, and higher prevalence among those less educated.  
36  
37 Obesity is a stronger risk factor for diabetes than for hypertension<sup>21 22</sup>. It is also possible that  
38  
39 the increase in primary care coverage has provided access to health care and, consequently,  
40  
41 increased the diagnosis of diabetes among those underprivileged (i.e., therefore, artificially  
42  
43 increasing the diabetes inequality). The National Program for Improving Access and Quality in  
44  
45 Primary Care and the Requalification Program for Basic Health Units (*Programa Nacional de*  
46  
47 *Melhoria do Acesso e da Qualidade da Atenção Básica -PMAQ*), created in 2011, as well as  
48  
49 the More Doctors for Brazil Project (*Mais Médicos para o Brasil*), created in 2013, increased  
50  
51 the number of health units and physicians' access to more than 65 million people<sup>23</sup>. If that was  
52  
53  
54  
55  
56  
57  
58  
59  
60

1  
2  
3  
4 the case, we would expect increase in social inequality for hypertension too<sup>24</sup>. Unless the  
5 requirement of fewer medical supplies for hypertension diagnosis compared to diabetes<sup>24</sup>  
6 causes less underreport for hypertension and, therefore, benefits less from the extension in  
7 primary care coverage not affecting the inequality.  
8  
9  
10  
11  
12

13 The increase in obesity prevalence over time, especially among the least educated  
14 group, have been reported in other countries<sup>25</sup>. This can be explained by the lower financial  
15 access to healthy food in addition to fewer opportunities to engage in leisure physical  
16 activities<sup>26</sup>. The gap in obesity prevalence between least and the most educated groups reduced  
17 over time, but it was not sufficient to impact SII indicator. However, due to an increase in  
18 obesity prevalence in all education groups, especially in those with 9 to 11 study years (53,1%  
19 while prevalence raised 33,3% in people with less than 4 years of study), relative inequality  
20 reduced. This reduction in relative inequality is an artificial change that should not be read as  
21 an achievement because does not reflect a beneficial change in inequality, but rather a  
22 worsening scenario for all strata of education. Brazil still lacks strong initiatives to protect the  
23 more vulnerable groups and tackle the social inequalities for obesity such as regulation of  
24 nutritional labelling claims and health warnings, advertising restrictions, protection of the food  
25 school environment and taxation of unhealthy food<sup>27</sup>, jointly with a broad promotion of active  
26 commuting and availability of public spaces for physical activity<sup>28</sup>.  
27  
28  
29  
30  
31  
32  
33  
34  
35  
36  
37  
38  
39  
40  
41  
42  
43  
44

45 Our results confirm the global decrease trend in smoking prevalence<sup>29</sup>, with a sharper  
46 reduction among the most educated adults<sup>30</sup>. This explained the increase in the relative  
47 educational inequality in most strata, except among men. Several actions have been taken to  
48 halt smoking, such as the ratification of the World Health Organization Framework Convention  
49 on Tobacco Control in 2005, which resulted in the Brazilian National Tobacco Control Policy<sup>31</sup>.  
50 These policies may have had less impact the least educated people<sup>32</sup>, increasing social  
51 inequality. Although actions, such as the taxation of tobacco products, immediately affect low-  
52  
53  
54  
55  
56  
57  
58  
59  
60

1  
2  
3  
4 income individuals, over time they resort to the illegal market, maintaining the cigarette use.  
5  
6 Recent work shows that, in Brazil, the illegal cigarette market grew from 28.6% in 2012 to  
7  
8 42.8% in 2016<sup>33</sup>. Moreover, most actions aimed at changing behavior in favor of smoking  
9  
10 cessation are educational, requiring cognitive skills for better understanding and, thus, more  
11  
12 educated people will benefit more from these interventions<sup>34</sup>. In addition, tobacco companies  
13  
14 have intensified marketing strategies to reach vulnerable populations, such as women<sup>35</sup>, which  
15  
16 may also justify the higher inequality in this group.  
17  
18  
19

20  
21 Educational inequality has disproportionately affected women and non-whites in  
22  
23 Brazil. Although women have had more schooling than men in Brazil, their average income has  
24  
25 been lower<sup>36</sup>. Illiteracy among women aged 15 years and over non-white was more than double  
26  
27 that of white women (10.2% and 4.9%, respectively). Although there was an improvement in  
28  
29 the education of the non-white adult population with 12 or more years of study between 1995  
30  
31 and 2015 (from 3.3 to 12%), this percentage among whites was more than two-fold higher in  
32  
33 2015 (25.9%)<sup>36</sup>. In Brazil, unlike other countries, social inequality drives racial disparities<sup>37</sup>.  
34  
35 Black people have less access to health care, less quality of health care and are less informed  
36  
37 about health promotion and disease prevention<sup>38</sup>.  
38  
39  
40

41  
42 We found punctual reduction in the disparities for obesity, and an increase in  
43  
44 disparities for diabetes and smoking, that are all modifiable risk factors sensitive to strategies  
45  
46 promoting health lifestyle<sup>39</sup>. Accordingly, policies targeting the vulnerable groups, such as  
47  
48 income redistribution<sup>40</sup>, a strong and broad social security system and health education and  
49  
50 promotion, would avoid the reinforcement of the current inequalities<sup>8</sup> and bring better health  
51  
52 outcomes for Brazilians. In the last decades, Brazil has adopted several policies that could  
53  
54 mitigate socioeconomic inequalities, with the potential to alter the prevalence of risk factors for  
55  
56 NCDs, such as the expansion of primary health care, through the Family Health Strategy, and  
57  
58 conditional cash transfer, through Bolsa Família Program. These policies increased the access  
59  
60

of the low-income population to health promotion and disease prevention actions <sup>41 42</sup>. Launched in 2011 by the Minister of Health of Brazil, the Strategic Action Plan for Tackling Chronic Non-Communicable Diseases in Brazil has made advances in surveillance (eg. national surveys and monitoring of mortality and risk factor reduction targets); health promotion (eg. encouragement of physical activity, adequate nutrition and health promotion through the creation of the Health Gym Program); regulation (eg. legislation on tobacco-free environments); and health care (eg. free of charge drugs for hypertension, diabetes, and asthma; organization of the emergency service network for cardiovascular diseases) <sup>43</sup>. More recently, a new plan for Tackling NCD in Brazil from 2021 to 2030 has been launched by the Minister of Health of Brazil, and it is guided to prevent NCD, promote health, while reducing health inequalities<sup>44</sup>. Despite efforts, limited advances have been achieved. Health inequality is a persistent phenomenon <sup>45</sup>. Moreover, since 2014, Brazil has been facing an economic crisis and recently adopted austerity policies that could negatively impact health inequality trends<sup>46</sup>.

Our results may serve as a starting point for new studies that can deepen into the causes that led to the reductions in educational inequalities observed for hypertension and obesity. Future studies also need to understand the reasons for an increase in educational inequality for diabetes and smoking.

Our study has some limitations. VIGITEL survey collected data only from the population with landlines and included only the adults living in Brazilian capitals and the federal district. Despite using weighting measures for the general population, we would expect some small differences in the prevalence of our outcomes if we had assessed a sample that was not limited by landline access<sup>11</sup>. Over time, the access to landlines has reduced, and older and wealthier households are more likely to have and retain a landline in addition to a mobile phone. Therefore, the set of those contacted in a landline-only survey will increasingly skew towards those older/ wealthier groups. This may have underestimated the prevalence of NCD in those

places with less landlines access<sup>47</sup>. Future studies need to assess social inequality for NCD in rural areas<sup>8</sup>. In addition, risk factors were self-reported and may be underestimated, especially medical diagnosis of diabetes and hypertension. This may have affected our results underestimating inequality in hypertension and diabetes, as it may have underestimated the prevalence among the least favored groups.

In conclusion, we observed maintenance in the educational gap for hypertension and decreased relative inequity in general obesity and among female and non-whites. The reduction in inequality for obesity should be read with caution because it reflects increases in obesity prevalence in all groups. The absolute educational inequality increased for diabetes in all strata and increased in absolute and relative forms for smoking in almost all strata.

## **CONTRIBUTION STATEMENT**

P.T.D. contributed to data analysis and interpretation and to drafting and revising the manuscript and figures. C.M.A., L.S.S., A.E.M.R. L.F.M.R. and E.S.M. contributed to study concept and design, data interpretation, revising the manuscript and figures, and final approval of the version submitted.

## **COMPETING INTERESTS**

The authors declare no competing interests.

## **FUNDING**

This research received financial support from the Brazilian National Council of Scientific and Technological Development (CNPq), 404905/2016-1, awarded to Catarina Machado Azeredo.

The study sponsor was not involved in the study's design; the collection, analysis, and interpretation of data; writing the report; or the decision to submit the report for publication.

## DATA SHARING STATEMENT

All datasets of VIGITEL are publicly available at: <http://svs.aids.gov.br/download/Vigitel/>

## REFERENCE

1. Malta DC, Andrade S, Oliveira TP, et al. Probability of premature death for chronic non-communicable diseases, Brazil and Regions, projections to 2025. *Rev Bras Epidemiol* 2019;22:e190030. doi: 10.1590/1980-549720190030 [published Online First: 2019/04/04]
2. Global, regional, and national age-sex specific mortality for 264 causes of death, 1980-2016: a systematic analysis for the Global Burden of Disease Study 2016. *Lancet* 2017;390(10100):1151-210. doi: 10.1016/s0140-6736(17)32152-9 [published Online First: 2017/09/19]
3. Collaborators GBDRF. Global, regional, and national comparative risk assessment of 84 behavioural, environmental and occupational, and metabolic risks or clusters of risks for 195 countries and territories, 1990-2017: a systematic analysis for the Global Burden of Disease Study 2017. *Lancet* 2018;392(10159):1923-94. doi: 10.1016/S0140-6736(18)32225-6 [published Online First: 2018/11/30]
4. Zhao D, Post WS, Blasco-Colmenares E, et al. Racial Differences in Sudden Cardiac Death. *Circulation* 2019;139(14):1688-97. doi: 10.1161/CIRCULATIONAHA.118.036553 [published Online First: 2019/02/05]
5. Beltran-Sanchez H, Andrade FC. Time trends in adult chronic disease inequalities by education in Brazil: 1998-2013. *Int J Equity Health* 2016;15(1):139. doi: 10.1186/s12939-016-0426-5 [published Online First: 2016/11/18]
6. Strong K, Mathers C, Leeder S, et al. Preventing chronic diseases: how many lives can we save? *Lancet* 2005;366(9496):1578-82. doi: 10.1016/s0140-6736(05)67341-2 [published Online First: 2005/11/01]
7. Nugent R, Bertram MY, Jan S, et al. Investing in non-communicable disease prevention and management to advance the Sustainable Development Goals. *Lancet* 2018;391(10134):2029-35. doi: 10.1016/s0140-6736(18)30667-6 [published Online First: 2018/04/09]
8. Niessen LW, Mohan D, Akuoku JK, et al. Tackling socioeconomic inequalities and non-communicable diseases in low-income and middle-income countries under the Sustainable Development agenda. *Lancet* 2018;391(10134):2036-46. doi: 10.1016/S0140-6736(18)30482-3 [published Online First: 2018/04/09]
9. de Azevedo Barros MB, Lima MG, Medina LP, et al. Social inequalities in health behaviors among Brazilian adults: National Health Survey, 2013. *Int J Equity Health*

- 2016;15(1):148. doi: 10.1186/s12939-016-0439-0 [published Online First: 2016/11/18]
10. Brasil. Vigitel Brasil 2018: vigilância de fatores de risco e proteção para doenças crônicas nas capitais dos 26 estados brasileiros e o Distrito Federal em 2018. In: transmissíveis DdAeSeVdDn, ed. Brasília: Ministério da Saúde, 2019:132.
  11. Bernal RTI, Malta DC, Claro RM, et al. Effect of the inclusion of mobile phone interviews to Vigitel. *Rev Saude Publica* 2017;51(suppl 1):15s. doi: 10.1590/s1518-8787.2017051000171 [published Online First: 2017/06/08]
  12. Knäuper B, Carrière K, Chamandy M, et al. How aging affects self-reports. *Eur J Ageing* 2016;13:185–93.
  13. WHO. Obesity: preventing and managing the global epidemic. Report of a WHO Consultation. In: Series WTR, ed. Geneva: WHO, World Health Organization, 2000.
  14. WHO. Handbook on health inequality monitoring: with a special focus on low- and middle-income countries. Geneva: WHO press, 2013:105.
  15. Barros AJ, Victora CG. Measuring coverage in MNCH: determining and interpreting inequalities in coverage of maternal, newborn, and child health interventions. *PLoS Med* 2013;10(5):e1001390. doi: 10.1371/journal.pmed.1001390 [published Online First: 2013/05/15]
  16. Silva I, Restrepo-Mendez MC, Costa JC, et al. Measurement of social inequalities in health: concepts and methodological approaches in the Brazilian context. *Epidemiol Serv Saude* 2018;27(1):e000100017. doi: 10.5123/S1679-49742018000100017 [published Online First: 2018/03/08]
  17. Antunes JLF, Cardoso MRA. Uso da análise de séries temporais em estudos epidemiológicos. *Epidemiologia e Serviços de Saúde* 2015;24:565-76.
  18. Malta DC, Bernal RTI, Andrade S, et al. Prevalence of and factors associated with self-reported high blood pressure in Brazilian adults. *Rev Saude Publica* 2017;51(suppl 1):11s. doi: 10.1590/S1518-8787.2017051000006 [published Online First: 2017/06/08]
  19. Fan AZ, Strasser SM, Zhang X, et al. State socioeconomic indicators and self-reported hypertension among US adults, 2011 behavioral risk factor surveillance system. *Prev Chronic Dis* 2015;12:E27. doi: 10.5888/pcd12.140353 [published Online First: 2015/02/27]
  20. Brasil. Política Nacional de Saúde Integral da População Negra: uma política do SUS. In: Saúde Md, ed. Brasília, 2017:44.
  21. Guh DP, Zhang W, Bansback N, et al. The incidence of co-morbidities related to obesity and overweight: A systematic review and meta-analysis. *BMC Public Health* 2009;9(1):88. doi: 10.1186/1471-2458-9-88
  22. Lanas F, Seron P. Diverging trends in obesity, diabetes, and raised blood pressure in the Americas. *The Lancet Global Health* 2020;8(1):e18-e19. doi: 10.1016/S2214-109X(19)30503-0
  23. Facchini LA, Tomasi E, Dilélio AS. Qualidade da Atenção Primária à Saúde no Brasil: avanços, desafios e perspectivas. *Saúde em Debate* 2018;42:208-23.
  24. Brasil. Cadernos de atenção básica n.35. Estratégias para o cuidado da pessoa com doença crônica. In: Saúde Md, ed. Brasília: Ministério da Saúde, 2014:162.
  25. Hulsegge G, Picavet HS, Blokstra A, et al. Today's adult generations are less healthy than their predecessors: generation shifts in metabolic risk factors: the Doetinchem Cohort Study. *Eur J Prev Cardiol* 2014;21(9):1134-44. doi: 10.1177/2047487313485512 [published Online First: 2013/04/12]

26. Malta DC, Santos MAS, Andrade SSCdA, et al. Tendência temporal dos indicadores de excesso de peso em adultos nas capitais brasileiras, 2006-2013. *Ciência & Saúde Coletiva* 2016;21:1061-69.
27. Huang TT, Cawley JH, Ashe M, et al. Mobilisation of public support for policy actions to prevent obesity. *Lancet* 2015;385(9985):2422-31. doi: 10.1016/s0140-6736(14)61743-8 [published Online First: 2015/02/24]
28. Malta DC, Barbosa da Silva J. Políticas to promote physical activity in Brazil. *Lancet* 2012;380(9838):195-6. doi: 10.1016/s0140-6736(12)61041-1 [published Online First: 2012/07/24]
29. Bruthans J, Mayer O, Jr., De Bacquer D, et al. Educational level and risk profile and risk control in patients with coronary heart disease. *Eur J Prev Cardiol* 2016;23(8):881-90. doi: 10.1177/2047487315601078 [published Online First: 2015/08/19]
30. Eliasson M, Eriksson M, Lundqvist R, et al. Comparison of trends in cardiovascular risk factors between two regions with and without a community and primary care prevention programme. *Eur J Prev Cardiol* 2018;25(16):1765-72. doi: 10.1177/2047487318778349 [published Online First: 2018/05/31]
31. Cavalcante TM, Pinho MCMd, Perez CdA, et al. Brasil: balanço da Política Nacional de Controle do Tabaco na última década e dilemas. *Cadernos de Saúde Pública* 2017;33
32. Bazotti A, Finokiet M, Conti IL, et al. Tabagismo e pobreza no Brasil: uma análise do perfil da população tabagista a partir da POF 2008-2009. *Ciência & Saúde Coletiva* 2016;21:45-52.
33. Szklo A, Iglesias RM, Carvalho de Souza M, et al. Trends in Illicit Cigarette Use in Brazil Estimated From Legal Sales, 2012-2016. *Am J Public Health* 2018;108(2):265-69. doi: 10.2105/ajph.2017.304117 [published Online First: 2017/12/22]
34. Silva STd, Martins MC, Faria FRd, et al. Combate ao Tabagismo no Brasil: a importância estratégica das ações governamentais. *Ciência & Saúde Coletiva* 2014;19:539-52.
35. Doku D. The tobacco industry tactics-a challenge for tobacco control in low and middle income countries. *Afr Health Sci* 2010;10(2):201-3. [published Online First: 2011/02/18]
36. IPEA. Retrato das Desigualdades de Gênero e Raça-1995 a 2015 4ed. Brasília: IPEA, 2011:39.
37. Victora C. Socioeconomic inequalities in Health: Reflections on the academic production from Brazil. *Int J Equity Health* 2016;15(1):164. doi: 10.1186/s12939-016-0456-z [published Online First: 2016/11/18]
38. IFMSA. IFMSA Policy Document Ethnicity and Health. Montreal, Canada: IFMSA, 2018.
39. Piepoli MF, Hoes AW, Agewall S, et al. 2016 European Guidelines on cardiovascular disease prevention in clinical practice: The Sixth Joint Task Force of the European Society of Cardiology and Other Societies on Cardiovascular Disease Prevention in Clinical Practice (constituted by representatives of 10 societies and by invited experts)Developed with the special contribution of the European Association for Cardiovascular Prevention & Rehabilitation (EACPR). *Eur Heart J* 2016;37(29):2315-81. doi: 10.1093/eurheartj/ehw106 [published Online First: 2016/05/26]
40. Xie X, Wu Q, Hao Y, et al. Identifying determinants of socioeconomic inequality in health service utilization among patients with chronic non-communicable diseases in China. *PLoS One* 2014;9(6):e100231. doi: 10.1371/journal.pone.0100231 [published Online First: 2014/06/25]



- 1
- 2
- 3
- 4
- 5 41. de Sousa MF. [The Family Health Program in Brazil: analysis of access to basic care].  
6 *Rev Bras Enferm* 2008;61(2):153-8. doi: 10.1590/s0034-71672008000200002  
7 [published Online First: 2008/06/25]
- 8 42. Santos LMP, Costa AM, Girardi SN. Programa Mais Médicos: uma ação efetiva para  
9 reduzir iniquidades em saúde. *Ciência & Saúde Coletiva* 2015;20:3547-52.
- 10 43. Malta DC, Oliveira TP, Santos MAS, et al. Avanços do Plano de Ações Estratégicas para  
11 o Enfrentamento das Doenças Crônicas não Transmissíveis no Brasil, 2011-2015. .  
12 *Epidemiol Serv Saúde* 2016;25
- 13 44. Brasil. Plano de ações estratégicas para o enfrentamento das doenças crônicas e agravos  
14 não transmissíveis no Brasil 2021-2030. In: SAÚDE MD, SAÚDE SDVE,  
15 DOENÇAS DDAESEVD, et al., eds. Brasília, DF: Ministério da Saúde, 2020:122.
- 16 45. Mackenbach JP, Valverde JR, Artnik B, et al. Trends in health inequalities in 27 European  
17 countries. *Proc Natl Acad Sci U S A* 2018;115(25):6440-45. doi:  
18 10.1073/pnas.1800028115 [published Online First: 2018/06/06]
- 19 46. Oreiro JL. A grande recessão brasileira: diagnóstico e uma agenda de política econômica.  
20 *Estudos Avançados* 2017;31:75-88.
- 21 47. Bernal RTI, Malta DC, de Araújo TS, et al. Inquérito por telefone: pesos de pós-estratifi  
22 cação para corrigir vícios de baixa cobertura em Rio Branco, AC. . *Rev Saúde Pública*  
23 2013;47(2):316-25  
24  
25  
26  
27  
28  
29  
30  
31  
32  
33  
34  
35  
36  
37  
38  
39  
40  
41  
42  
43  
44  
45  
46  
47  
48  
49  
50  
51  
52  
53  
54  
55  
56  
57  
58  
59  
60

**Table 1: Sociodemographic characteristics and risk factor prevalence, according to survey year of VIGITEL (2007-2018).**

| Characteristics               | Survey year and Standard Error |            |            |            |            |            |            |            |            |            |            |            | p value |
|-------------------------------|--------------------------------|------------|------------|------------|------------|------------|------------|------------|------------|------------|------------|------------|---------|
|                               | 2007                           | 2008       | 2009       | 2010       | 2011       | 2012       | 2013       | 2014       | 2015       | 2016       | 2017       | 2018       |         |
| Individuals (n)               | 54,271                         | 52,641     | 52,726     | 52,628     | 51,656     | 40,374     | 45,889     | 34,991     | 49,919     | 46,488     | 48,931     | 48,463     | -       |
| Mean age (years)              | 39.8 ± 0.1                     | 39.9 ± 0.1 | 40.2 ± 0.1 | 40.3 ± 0.1 | 40.4 ± 0.1 | 40.1 ± 0.1 | 40.2 ± 0.1 | 40.2 ± 0.2 | 40.9 ± 0.1 | 40.7 ± 0.1 | 41.4 ± 0.1 | 41.7 ± 0.1 | 0.001   |
| Education (years)             | 9.4 ± 0.0                      | 9.4 ± 0.0  | 9.6 ± 0.0  | 9.8 ± 0.0  | 9.9 ± 0.0  | 10.3 ± 0.0 | 10.4 ± 0.0 | 10.6 ± 0.1 | 10.5 ± 0.0 | 10.8 ± 0.0 | 10.6 ± 0.0 | 10.7 ± 0.0 | <0.001  |
| Sex (%)                       |                                |            |            |            |            |            |            |            |            |            |            |            |         |
| Female                        | 53.2 ± 0.4                     | 53.3 ± 0.4 | 53.3 ± 0.5 | 53.2 ± 0.5 | 53.2 ± 0.4 | 53.3 ± 0.5 | 53.4 ± 0.5 | 53.4 ± 0.6 | 53.1 ± 0.5 | 53.3 ± 0.5 | 53.3 ± 0.5 | 53.2 ± 0.5 | 0.858   |
| Male                          | 46.8 ± 0.4                     | 46.7 ± 0.4 | 46.7 ± 0.5 | 46.8 ± 0.5 | 46.8 ± 0.4 | 46.7 ± 0.5 | 46.6 ± 0.5 | 46.6 ± 0.6 | 46.9 ± 0.5 | 46.7 ± 0.5 | 46.7 ± 0.5 | 46.8 ± 0.5 | 0.858   |
| Skin color (%)                |                                |            |            |            |            |            |            |            |            |            |            |            |         |
| White                         | 40.8 ± 0.4                     | 39.0 ± 0.4 | 39.1 ± 0.4 | 39.8 ± 0.5 | 43.9 ± 0.4 | 43.5 ± 0.5 | 45.0 ± 0.5 | 43.6 ± 0.5 | 41.2 ± 0.5 | 46.2 ± 0.5 | 42.1 ± 0.5 | 41.4 ± 0.5 | 0.154   |
| Non-white                     | 59.2 ± 0.4                     | 61.0 ± 0.4 | 60.9 ± 0.4 | 60.2 ± 0.5 | 56.1 ± 0.4 | 56.5 ± 0.5 | 55.0 ± 0.5 | 56.4 ± 0.5 | 58.8 ± 0.5 | 53.8 ± 0.5 | 57.9 ± 0.5 | 58.6 ± 0.5 | 0.154   |
| Risk factors (%) <sup>+</sup> |                                |            |            |            |            |            |            |            |            |            |            |            |         |
| Hypertension                  | 34.1 ± 0.3                     | 35.5 ± 0.3 | 35.4 ± 0.3 | 35.6 ± 0.3 | 34.9 ± 0.3 | 33.6 ± 0.3 | 33.1 ± 0.3 | 33.8 ± 0.3 | 33.7 ± 0.2 | 33.6 ± 0.2 | 33.2 ± 0.2 | 33.3 ± 0.2 | 0.065   |
| Diabetes                      | 8.9 ± 0.2                      | 9.3 ± 0.2  | 10.0 ± 0.2 | 10.3 ± 0.2 | 10.2 ± 0.2 | 9.9 ± 0.2  | 9.5 ± 0.2  | 10.9 ± 0.2 | 10.2 ± 0.2 | 12.0 ± 0.2 | 10.4 ± 0.2 | 10.6 ± 0.2 | 0.004   |
| Smoking                       | 13.0 ± 0.2                     | 12.3 ± 0.2 | 11.9 ± 0.2 | 11.2 ± 0.2 | 11.0 ± 0.2 | 10.0 ± 0.2 | 8.8 ± 0.2  | 8.7 ± 0.2  | 8.1 ± 0.1  | 7.9 ± 0.1  | 7.6 ± 0.1  | 7.4 ± 0.1  | <0.001  |
| Obesity                       | 14.7 ± 0.2                     | 15.5 ± 0.2 | 15.9 ± 0.2 | 16.8 ± 0.2 | 17.7 ± 0.2 | 18.2 ± 0.2 | 18.1 ± 0.2 | 18.8 ± 0.2 | 19.0 ± 0.2 | 19.1 ± 0.2 | 19.1 ± 0.2 | 20.0 ± 0.2 | <0.001  |

<sup>+</sup> Age standardized according to 2018 age distribution.

**Table 2:** Age standardized Slope Index of Inequality (SII) and Concentration Index (CIX) in hypertension, diabetes, smoking and obesity.

| Risk factor  | SII (95% CI)         |                      |         | CIX (95% CI)         |                      |         |
|--------------|----------------------|----------------------|---------|----------------------|----------------------|---------|
|              | 2007                 | 2018                 | p-value | 2007                 | 2018                 | p-value |
| Hypertension | -36.8 (-38.8; -34.9) | -37.8 (-39.3; -36.2) | 0.701   | -15.9 (-16.9; -14.9) | -16.0 (-16.8; -15.2) | 0.658   |
| Female       | -44.5 (-46.9; -42.0) | -44.1 (-45.9; -42.2) | 0.055   | -18.3 (-19.5; -17.1) | -18.2 (-19.2; -17.3) | 0.500   |
| Male         | -20.2 (-23.3; -17.0) | -23.5 (-26.0; -21.0) | 0.641   | -9.2 (-11.0; -7.5)   | -9.9 (-11.4; -8.4)   | 0.916   |
| White        | -33.5 (-36.6; -30.4) | -35.5 (-37.8; -33.2) | 0.757   | -14.3 (-15.9; -12.7) | -14.3 (-15.6; -13.0) | 0.317   |
| Non-white    | -39.6 (-42.1; -37.1) | -40.3 (-42.3; -38.3) | 0.711   | -17.0 (-18.2; -15.7) | -17.5 (-18.6; -16.4) | 0.812   |
| Diabetes     | -12.8 (-14.3; -11.3) | -17.7 (-18.9; -16.5) | 0.001   | -20.3 (-22.8; -17.9) | -24.0 (-25.7; -22.3) | 0.350   |
| Female       | -15.9 (-17.9; -13.9) | -19.9 (-21.5; -18.4) | 0.001   | -24.6 (-27.5; -21.7) | -26.9 (-29.0; -24.8) | 0.708   |
| Male         | -6.8 (-8.9; -4.6)    | -13.4 (-15.3; -11.6) | 0.001   | -10.8 (-15.0; -6.7)  | -17.7 (-20.6; -14.9) | 0.056   |
| White        | -11.1 (-13.4; -8.9)  | -15.7 (-17.5; -14.0) | 0.001   | -19.0 (-22.8; -15.1) | -21.1 (-23.7; -18.4) | 0.616   |
| Non-white    | -14.0 (-16.1; -12.0) | -19.7 (-21.3; -18.1) | 0.001   | -21.2 (-24.3; -18.1) | -26.4 (-28.6; -24.2) | 0.128   |
| Smoking      | -2.7 (-4.1; -1.3)    | -6.4 (-7.4; -5.4)    | 0.205   | -3.5 (-5.3; -1.8)    | -12.1 (-14.2; -10.0) | 0.004   |
| Female       | -1.3 (-2.9; 0.4)     | -6.2 (-7.4; -5.1)    | 0.025   | -2.0 (-4.4; 0.4)     | -14.4 (-17.4; -11.5) | 0.001   |
| Male         | -7.2 (-9.7; -4.8)    | -7.6 (-9.3; -5.9)    | 0.632   | -7.1 (-9.5; -4.7)    | -10.4 (-13.4; -7.5)  | 0.154   |
| White        | -0.4 (-2.6; 1.7)     | -4.3 (-5.8; -2.8)    | 0.004   | -1.0 (-3.7; 1.7)     | -6.6 (-9.7; -3.5)    | 0.001   |
| Non-white    | -4.4 (-6.2; -2.6)    | -8.7 (-10.0; -7.4)   | 0.433   | -5.4 (-7.6; -3.2)    | -18.2 (-20.9; -15.4) | 0.008   |
| Obesity      | -10.8 (-12.4; -9.2)  | -12.2 (-13.6; -10.7) | 0.251   | -11.3 (-13.0; -9.6)  | -8.6 (-9.8; -7.4)    | 0.010   |
| Female       | -16.6 (-18.7; -14.5) | -18.0 (-19.8; -16.2) | 0.701   | -17.4 (-19.5; -15.2) | -12.9 (-14.4; -11.5) | 0.009   |
| Male         | -0.4 (-2.7; 1.9)     | -0.8 (-3.1; 1.5)     | 0.137   | -0.5 (-3.0; 2.0)     | -0.2 (-2.0; 1.7)     | 0.307   |
| White        | -9.7 (-12.1; -7.3)   | -11.9 (-14.0; -9.8)  | 0.075   | -11.0 (-13.7; -8.2)  | -8.4 (-10.3; -6.6)   | 0.145   |
| Non-white    | -11.2 (-13.3; -9.1)  | -11.9 (-13.8; -10.0) | 0.822   | -10.9 (-13.0; -8.8)  | -8.1 (-9.6; -6.6)    | 0.011   |

**Figure 1:** Age-standardized prevalence of hypertension, diabetes, smoking and obesity by years of education and survey year from 2007 to 2018. VIGITEL, 2007-2018.

**Figure 2:** Trends in total slope index of inequality (SII) and concentration index (CIX) for age-standardized prevalence of hypertension, diabetes, smoking and obesity, VIGITEL 2007-2018.

**c: annual change of index; p= p-value.**

**Figure 3:** Trends in slope index of inequality (SII) and concentration index (CIX) for age-standardized prevalence of hypertension, diabetes, smoking and obesity by sex, VIGITEL 2007-2018.

**c: annual change of index; p= p-value.**

**Figure 4:** Trends in slope index of inequality (SII) and concentration index (CIX) for age-standardized prevalence of hypertension, diabetes, smoking and obesity by skin color, VIGITEL 2007-2018.

**c: annual change of index; p= p-value.**

1  
2  
3  
4  
5  
6  
7  
8  
9  
10  
11  
12  
13  
14  
15  
16  
17  
18  
19  
20  
21  
22  
23  
24  
25  
26  
27  
28  
29  
30  
31  
32  
33  
34  
35  
36  
37  
38  
39  
40  
41  
42  
43  
44  
45  
46

# Hypertension

# Diabetes

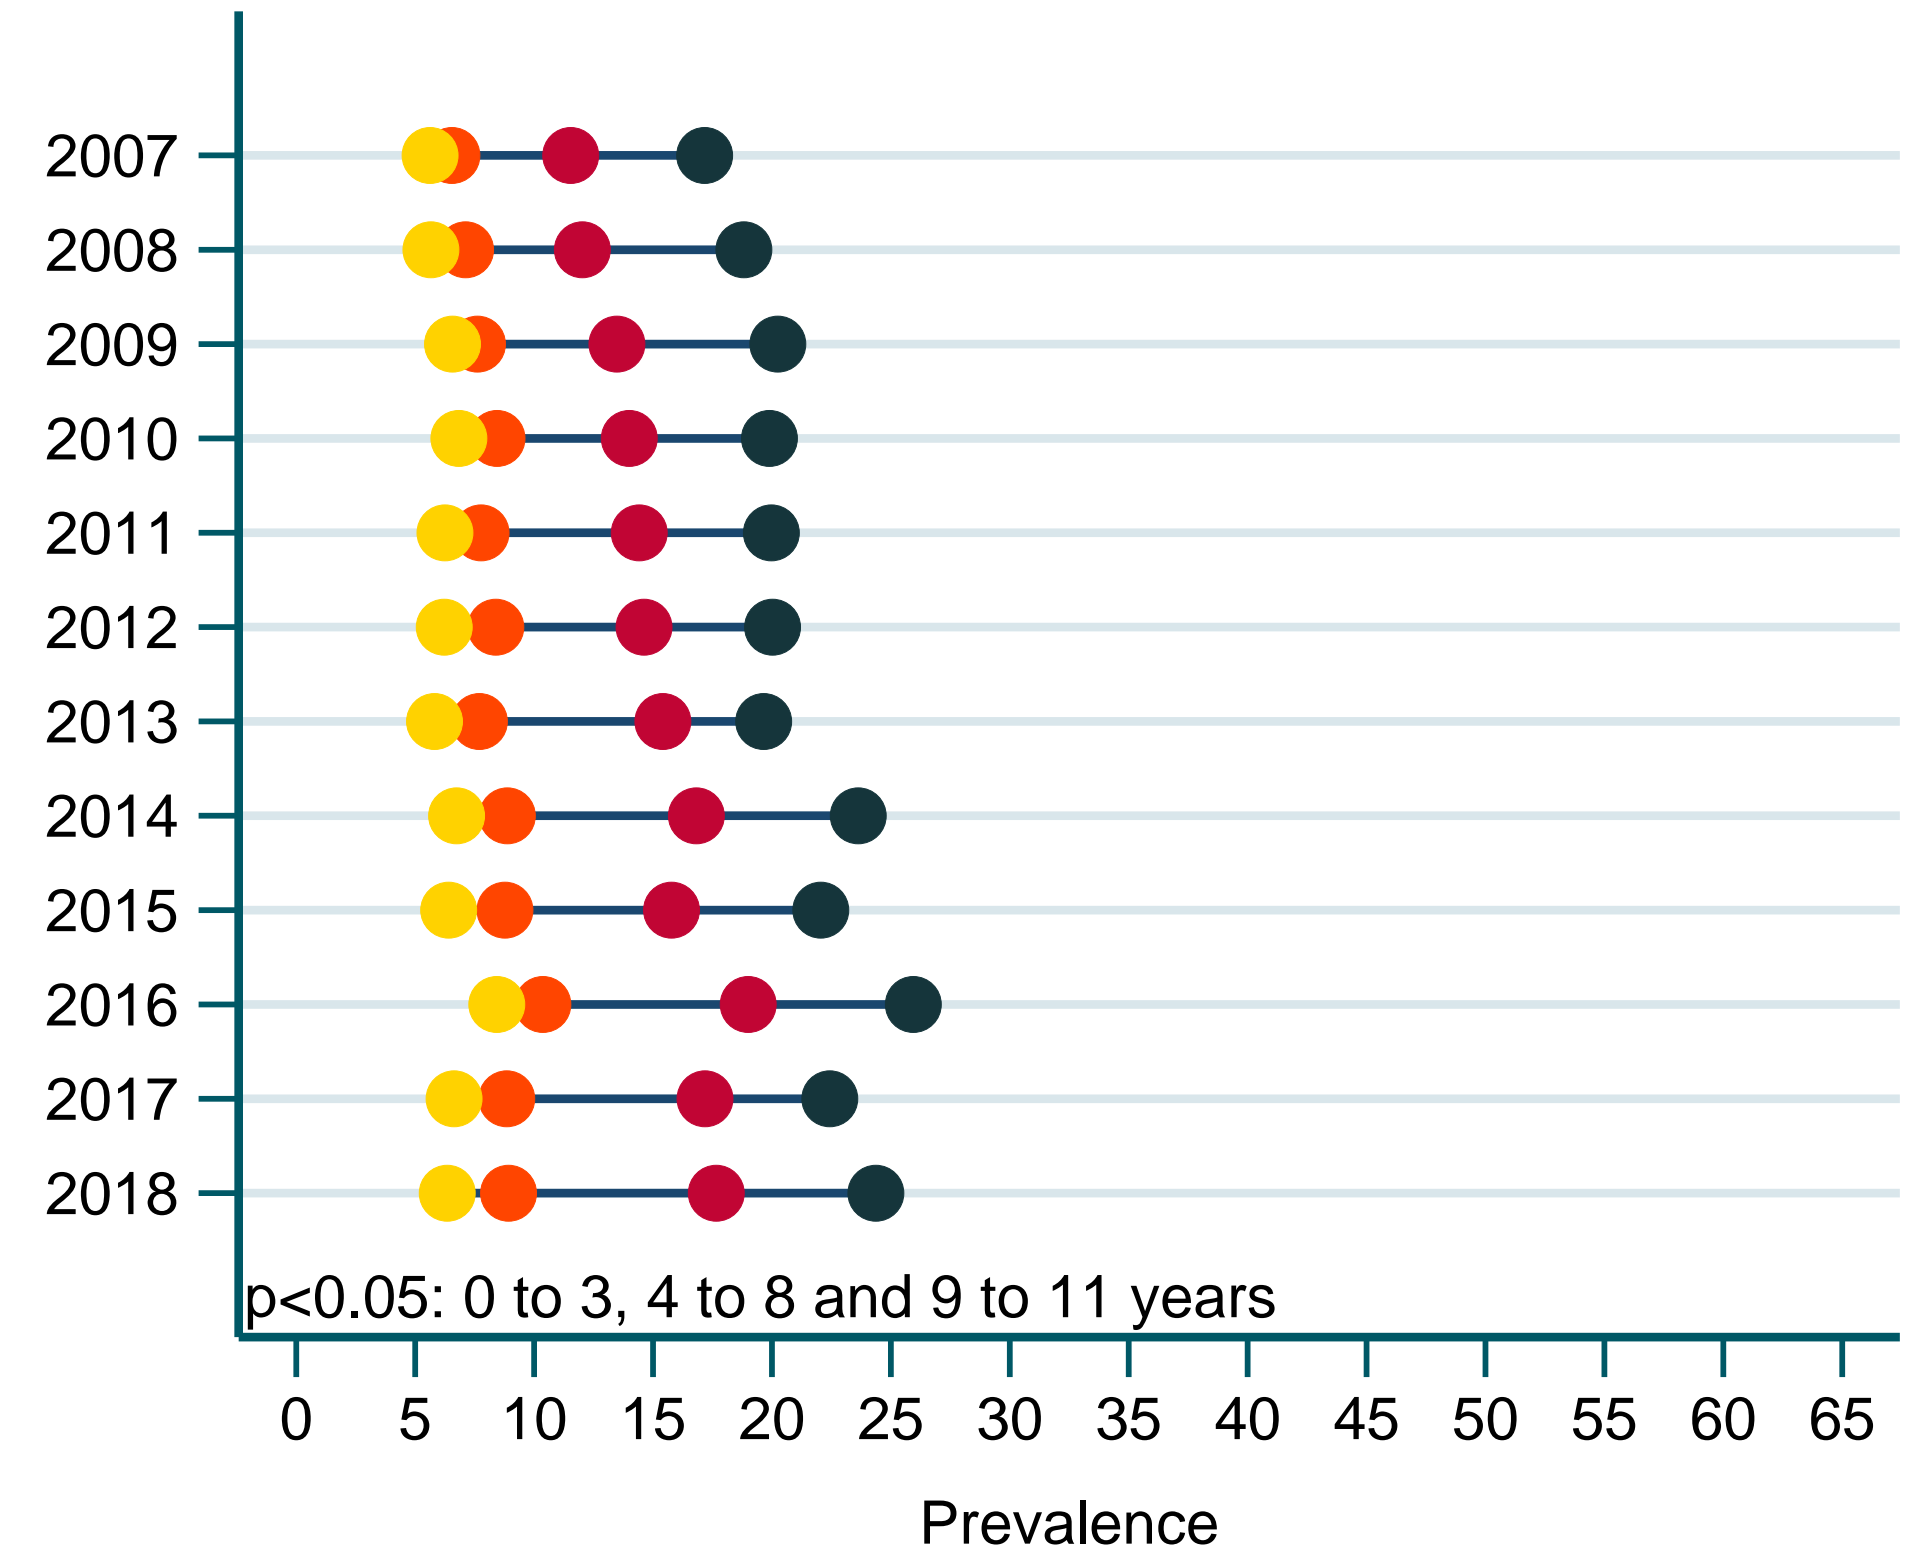

# Smoking

# Obesity

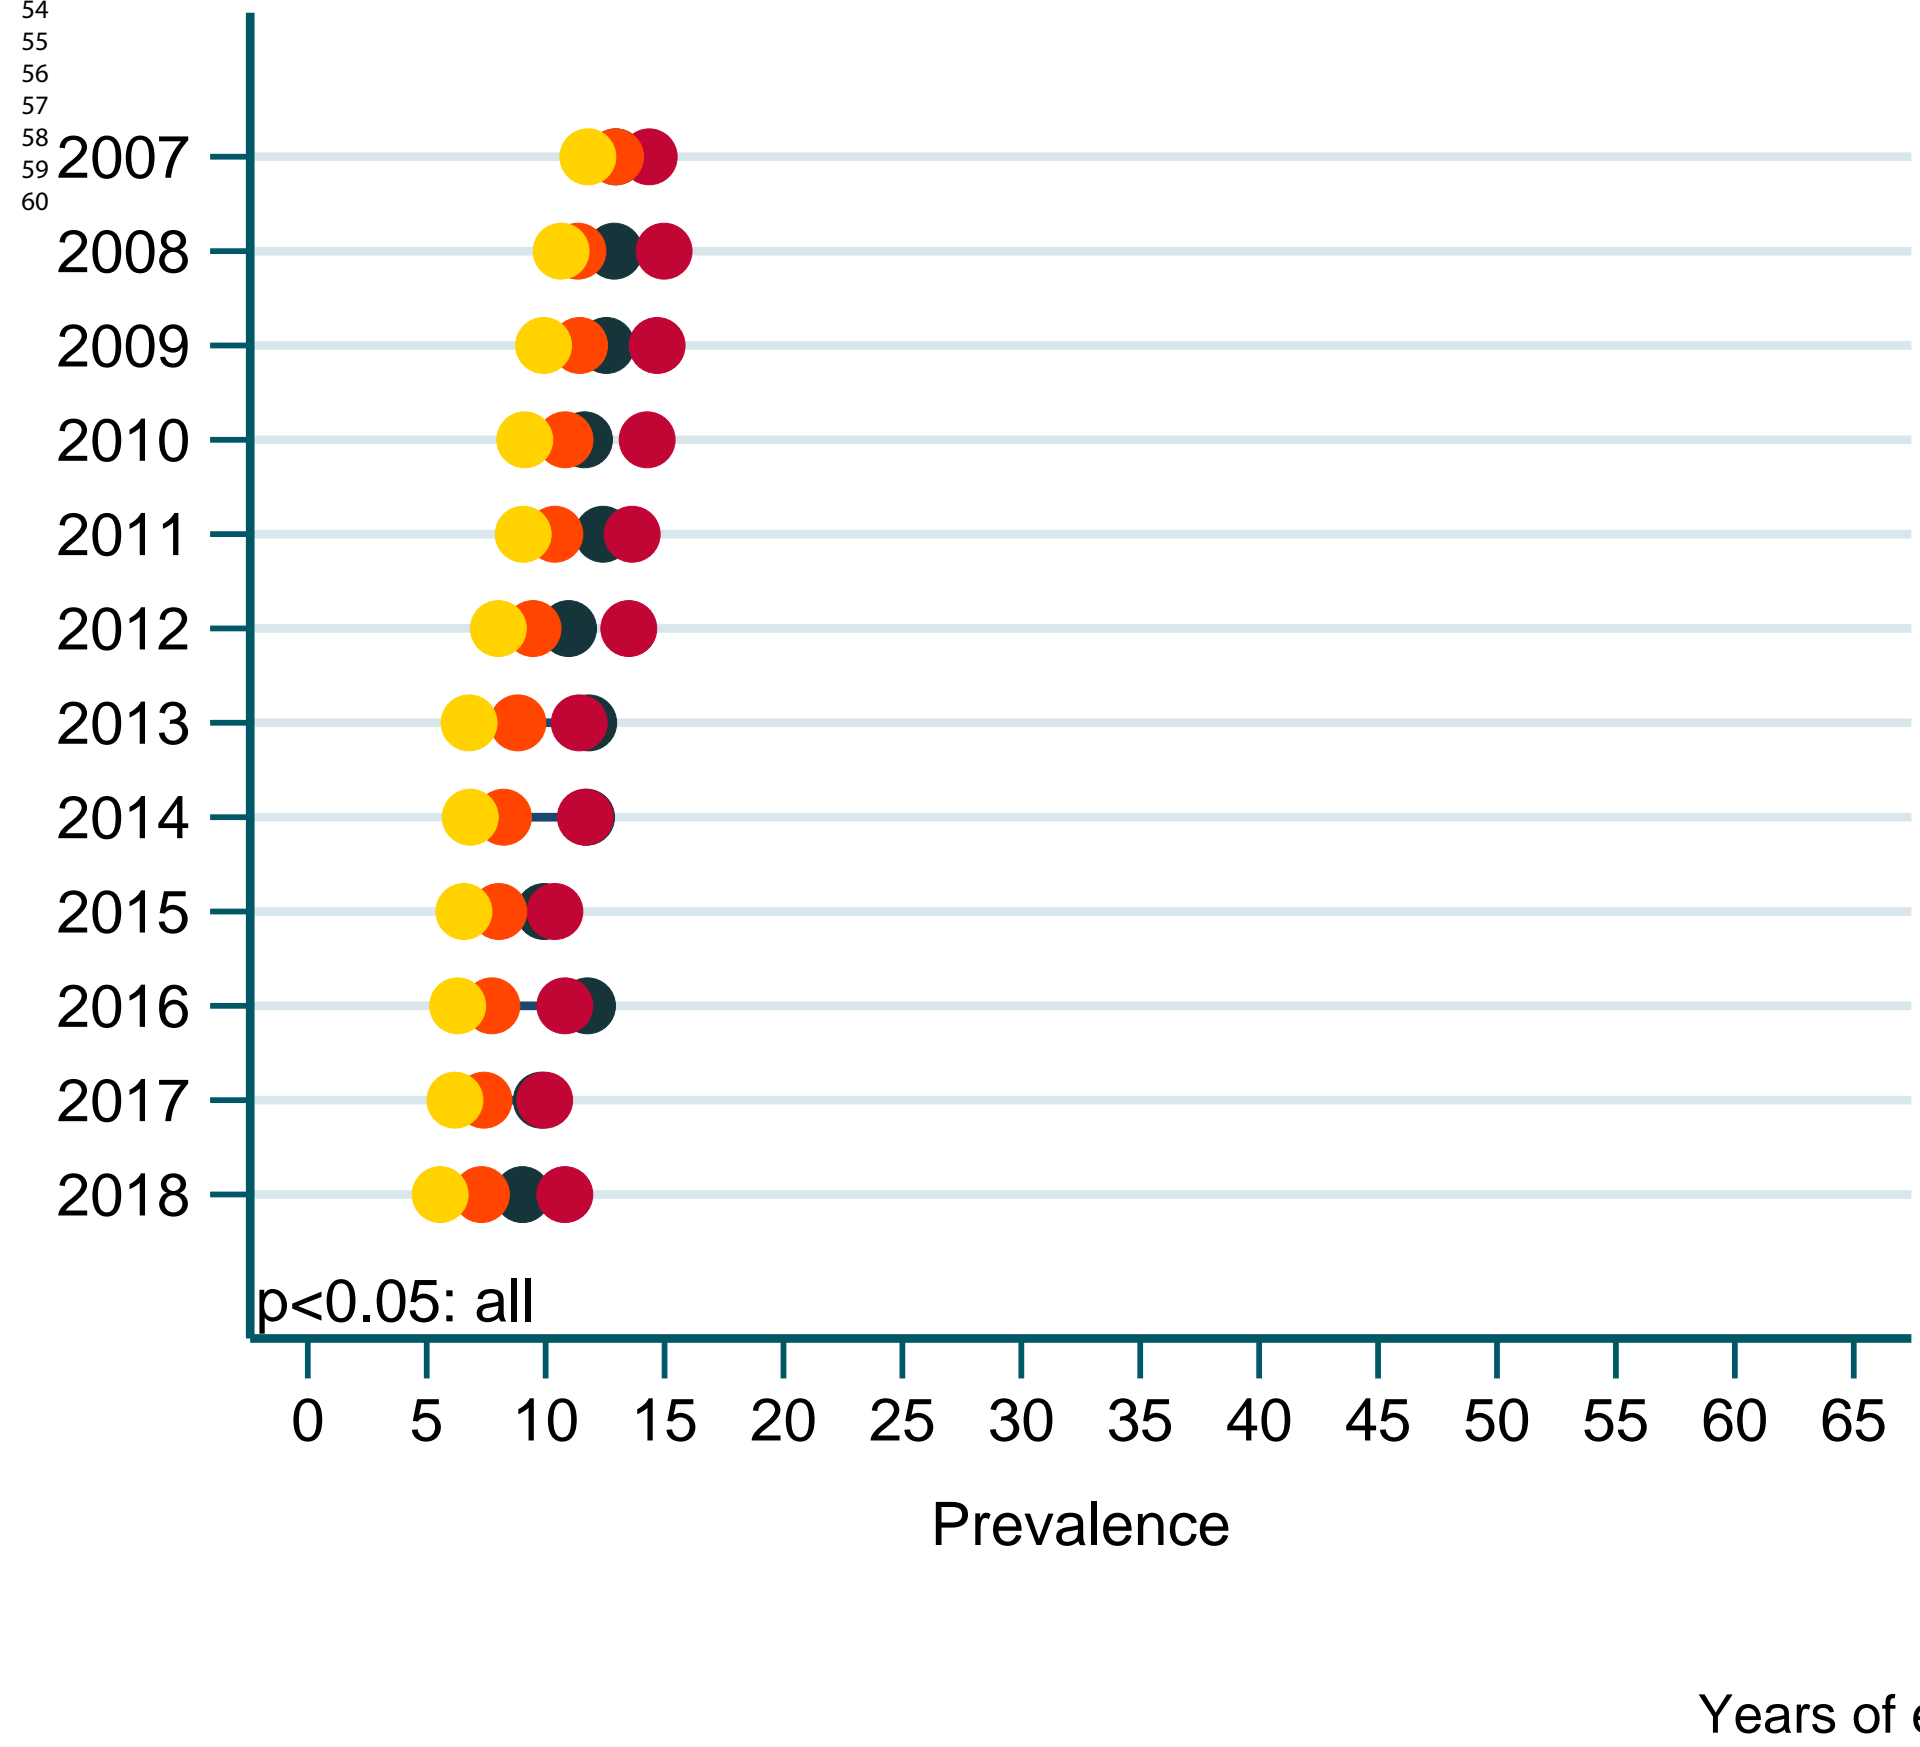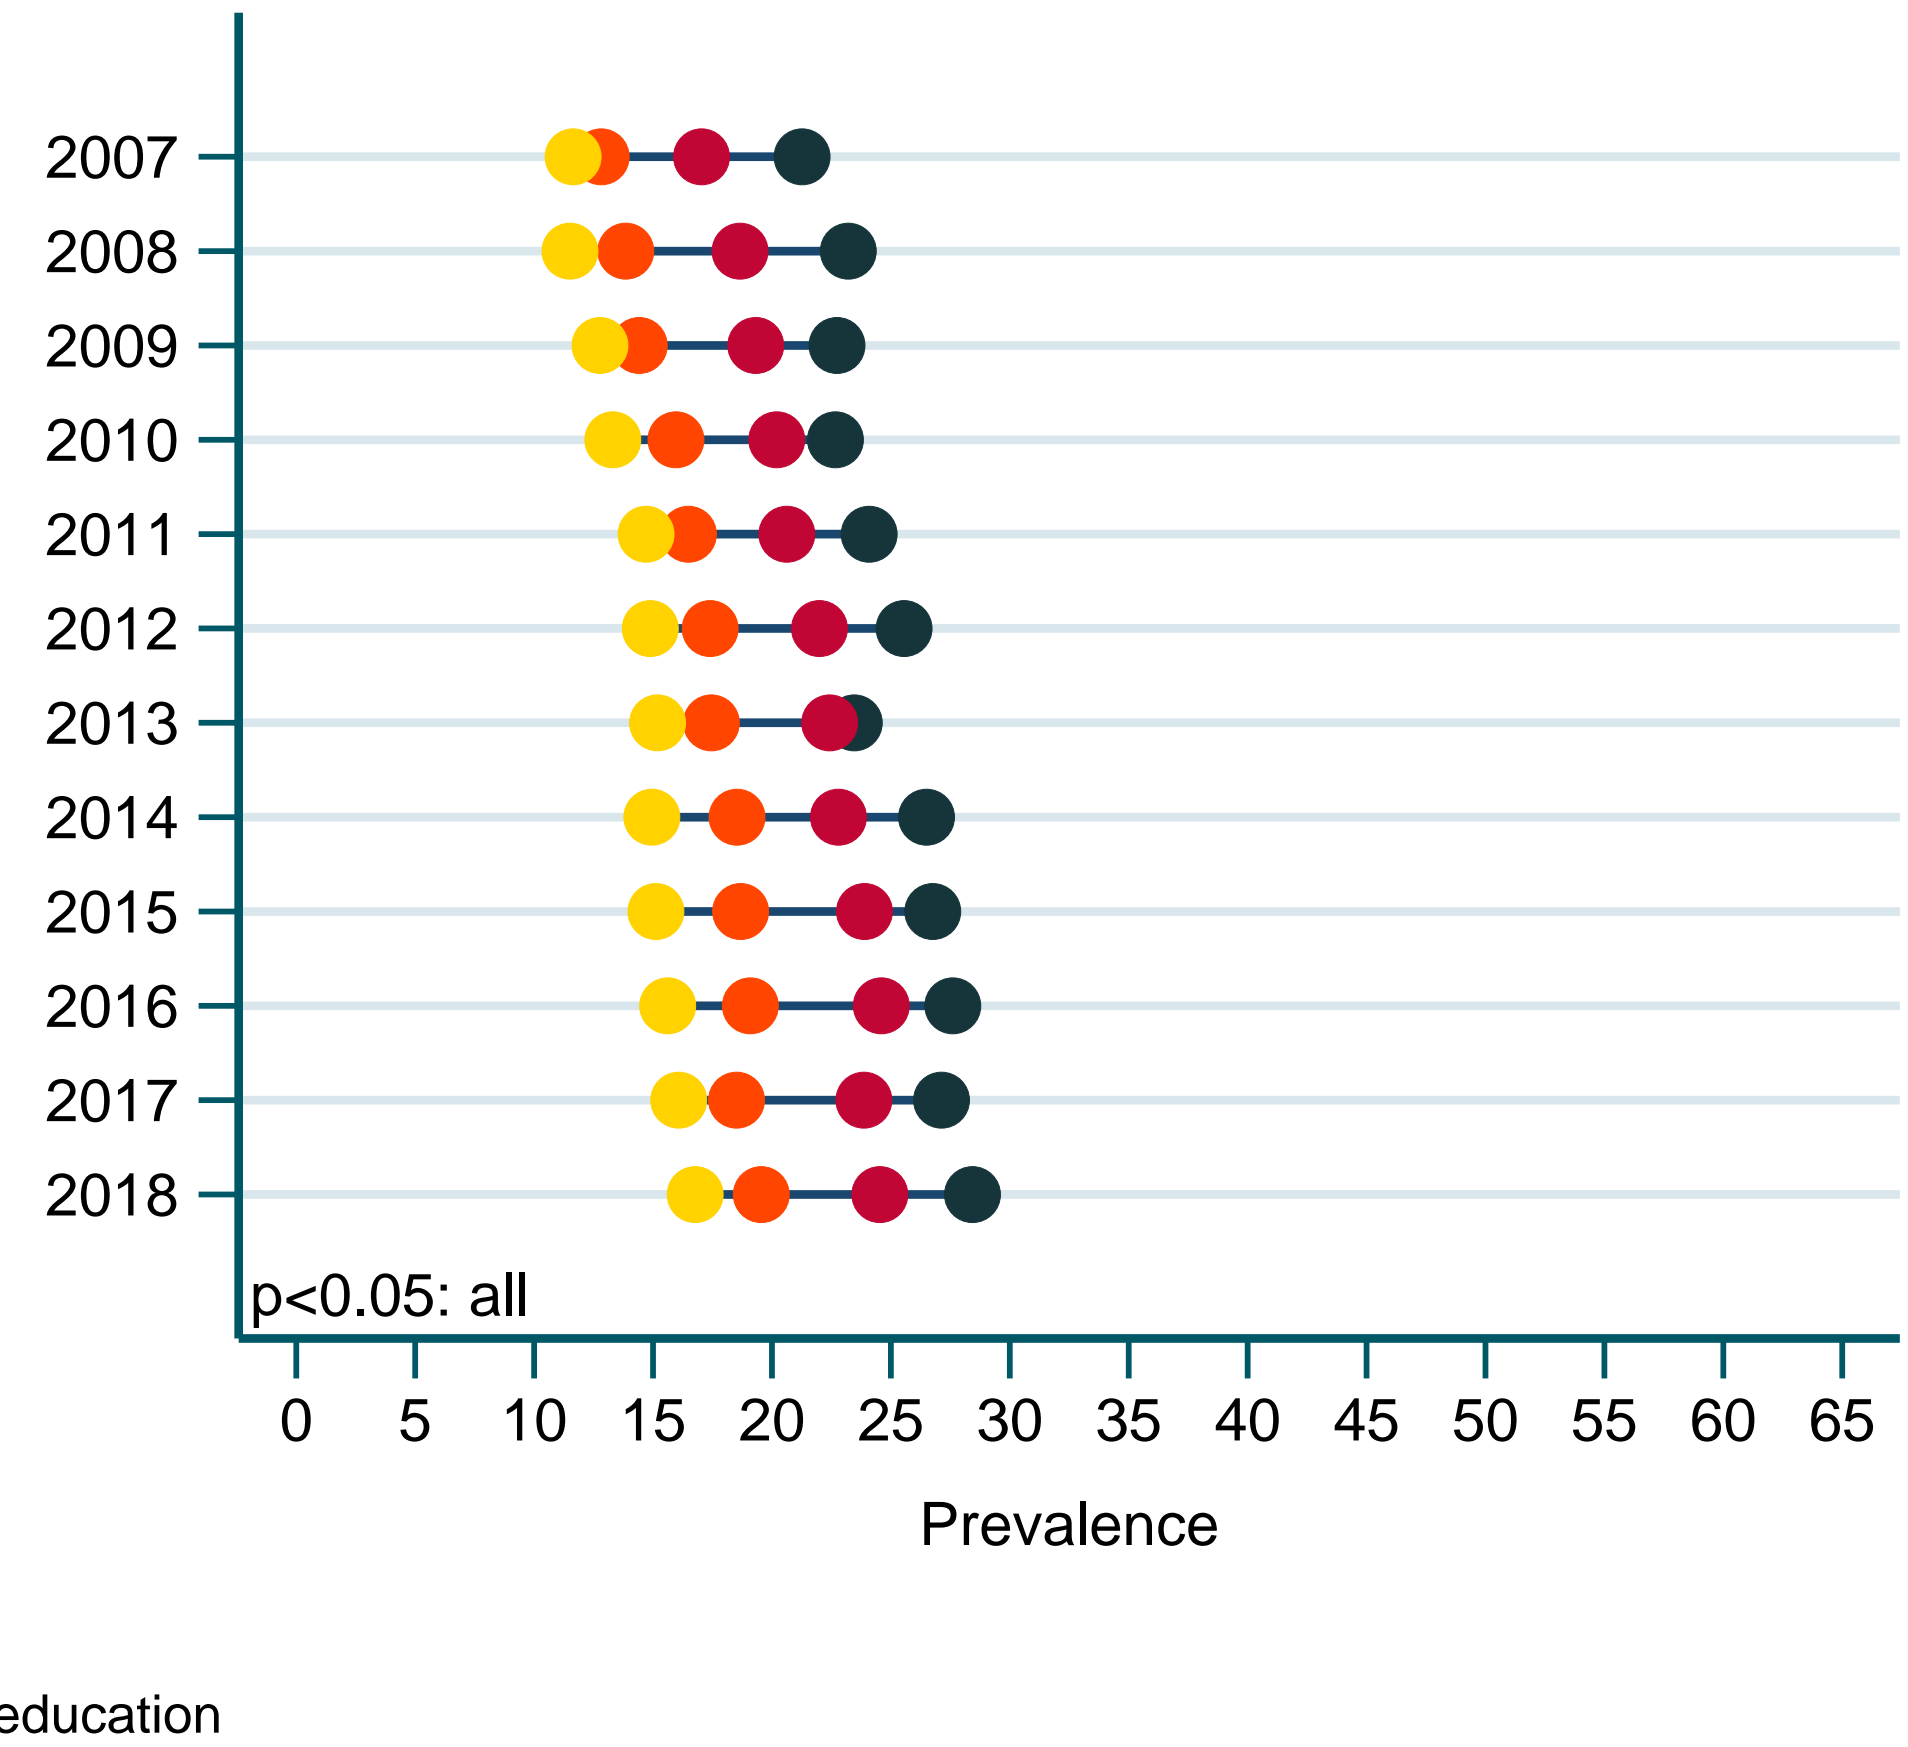

● 0 to 3 years ● 4 to 8 years ● 9 to 11 years ● 12 or more years

# Total Slope Index of Inequality

BMJ Open

# Total Concentration Index

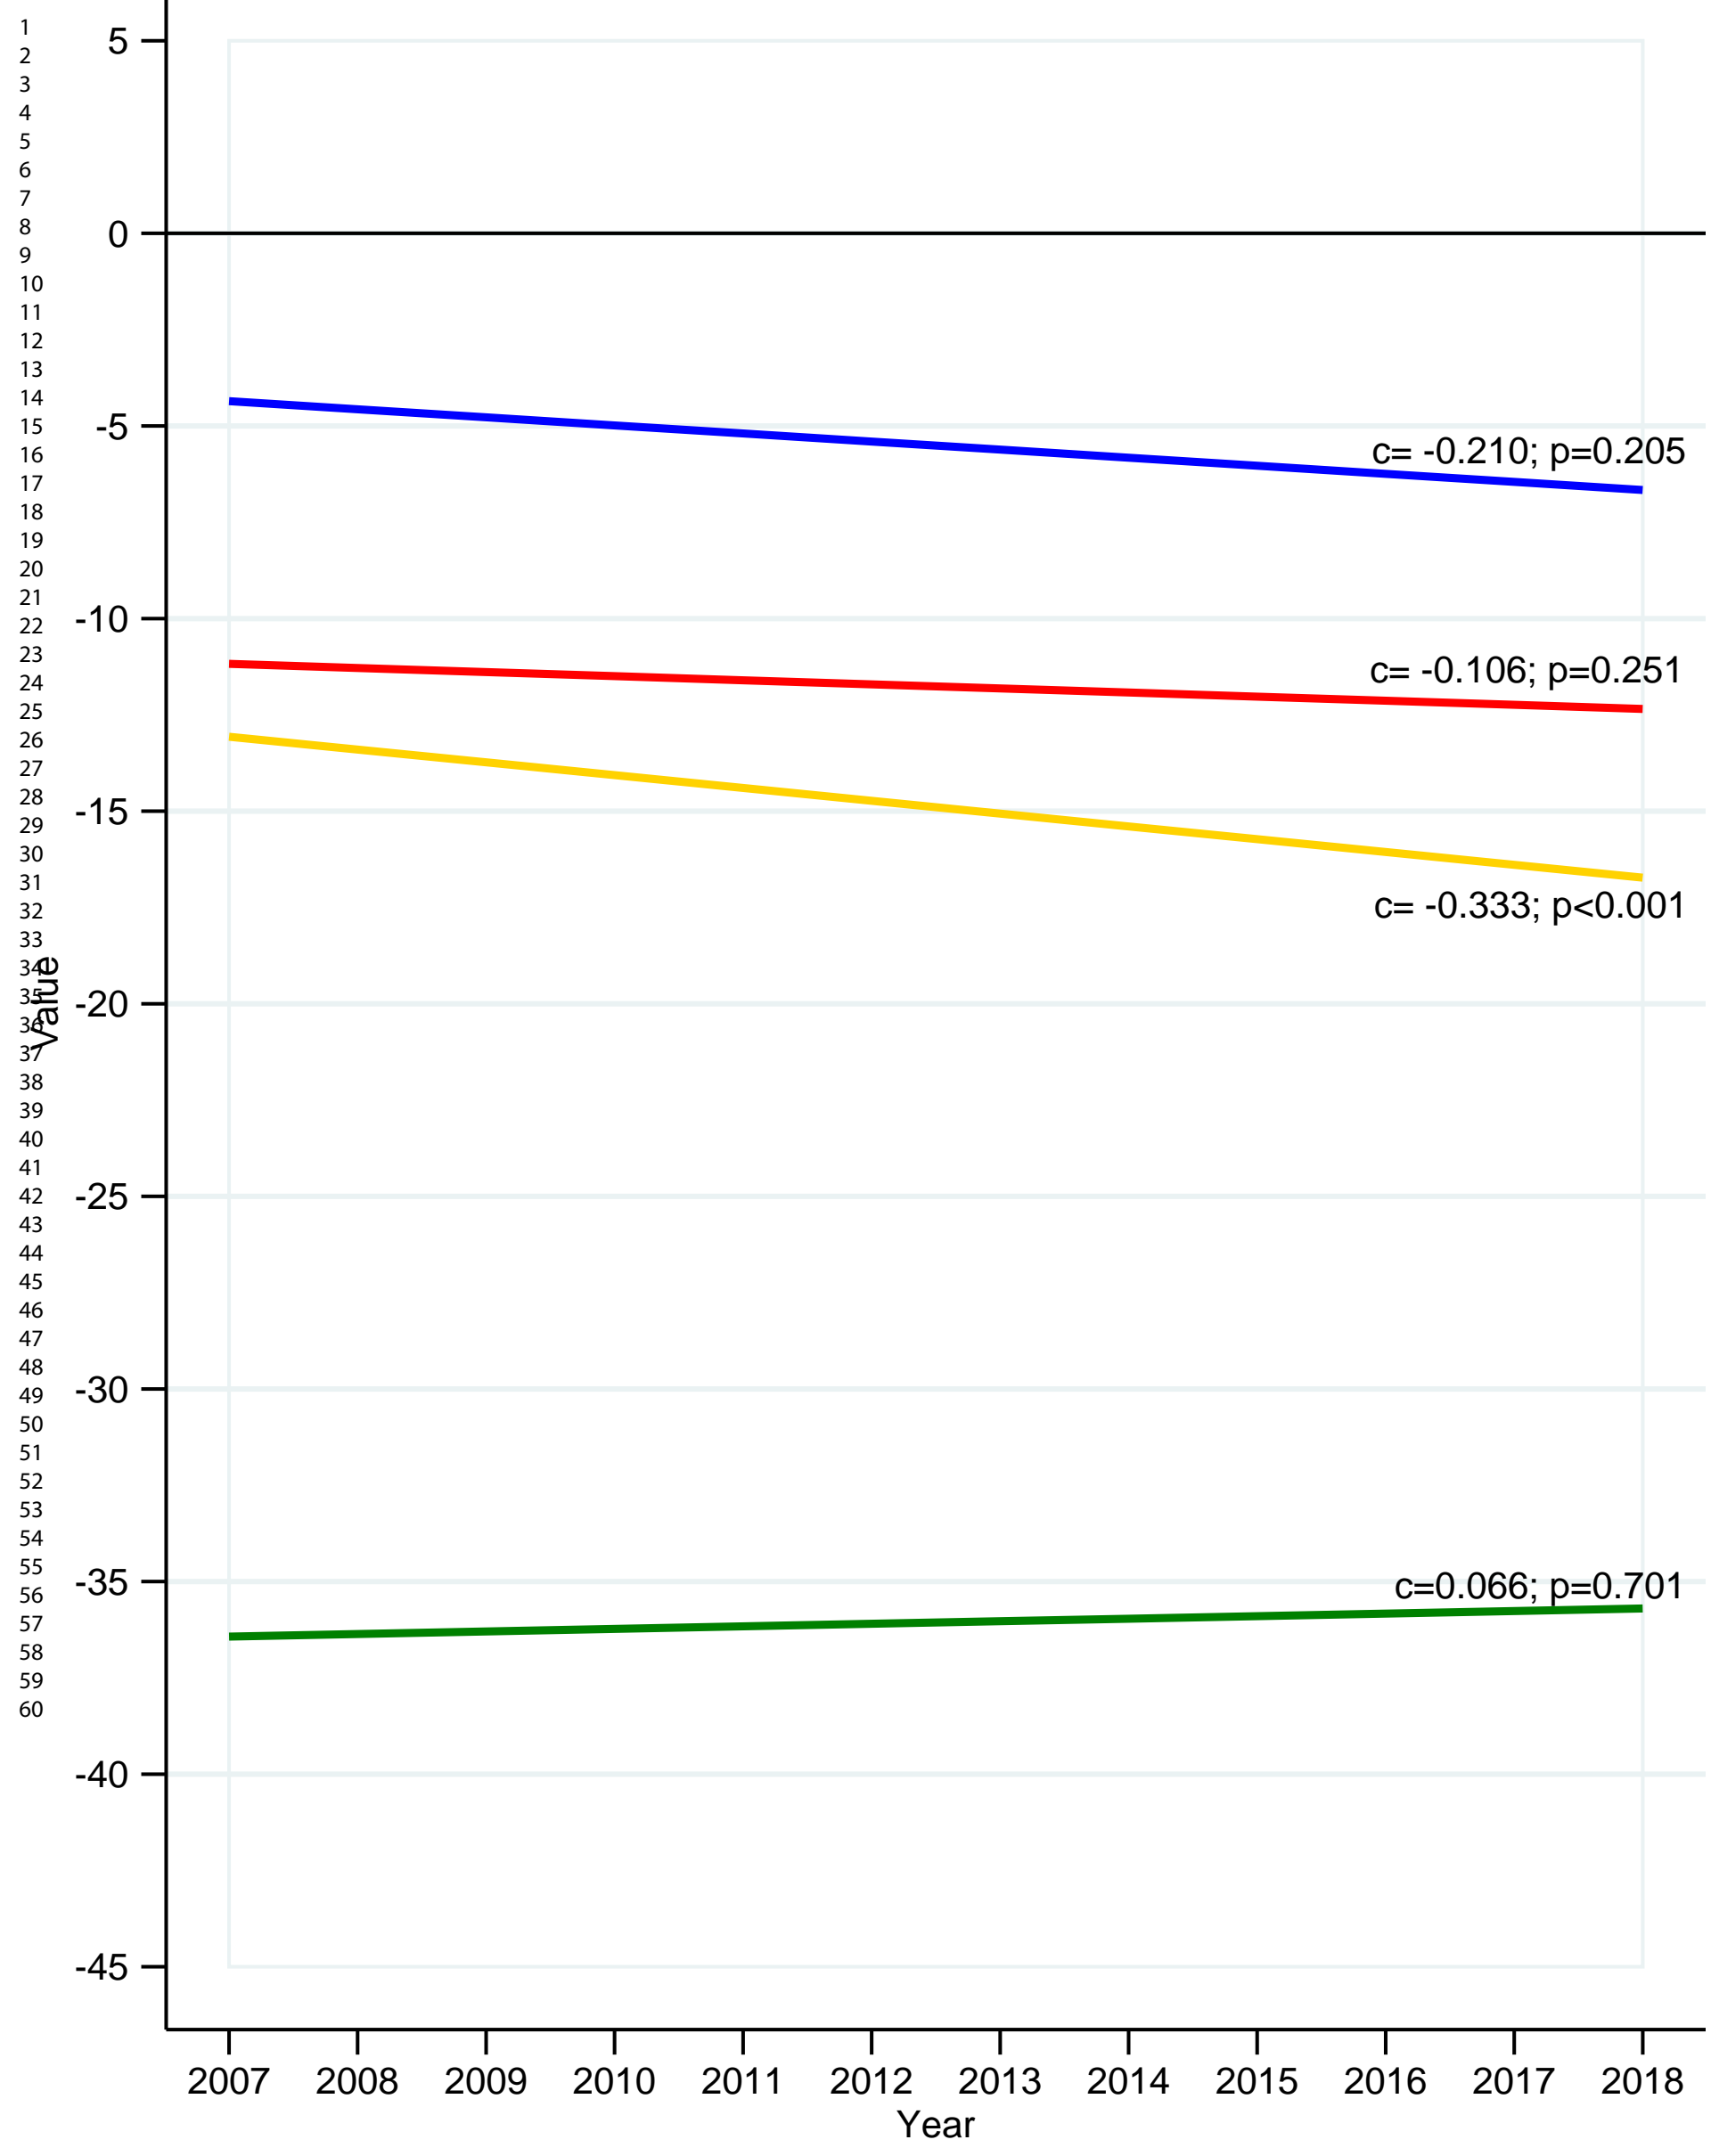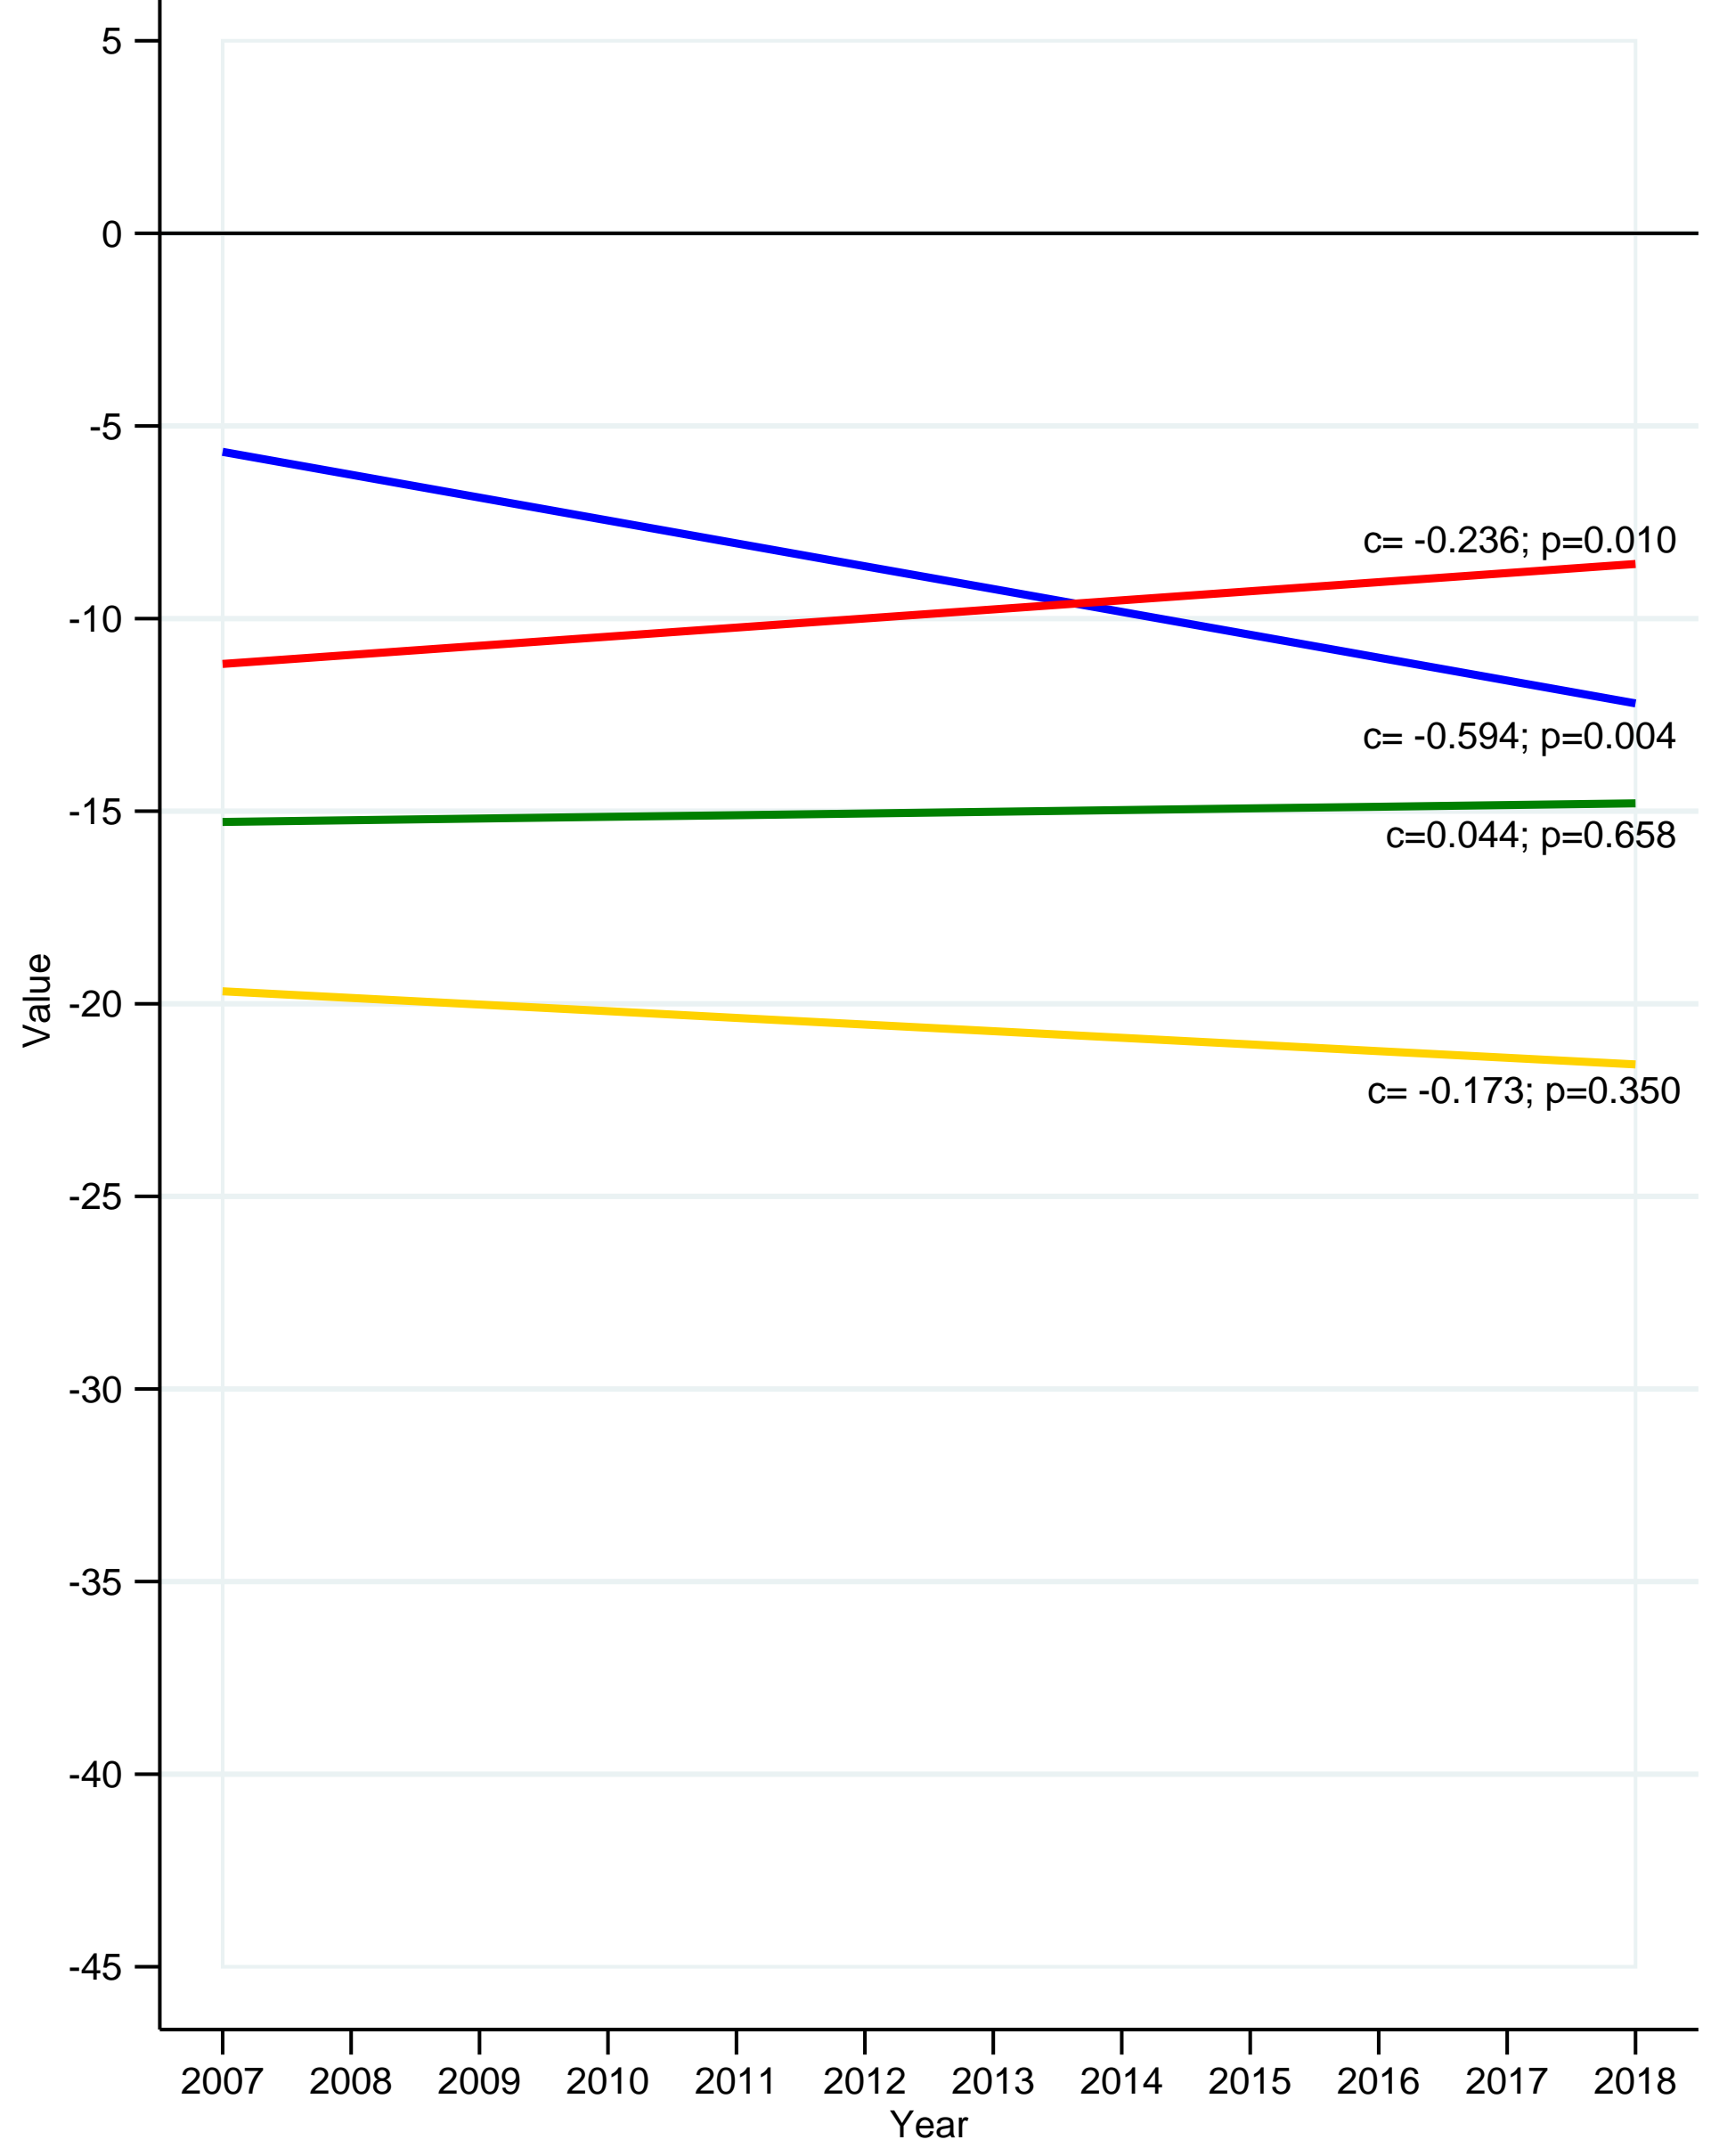

— Hypertension 
 — Diabetes 
 — Smoking 
 — Obesity

# Hypertension

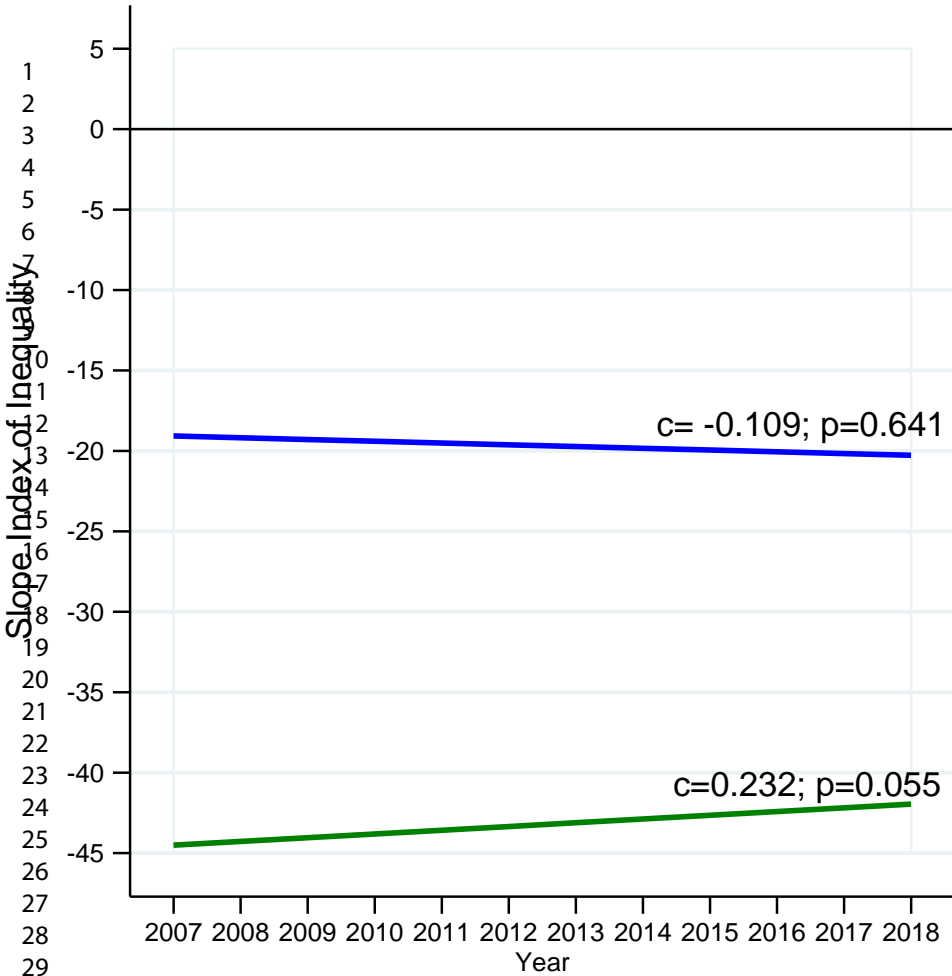

# Diabetes

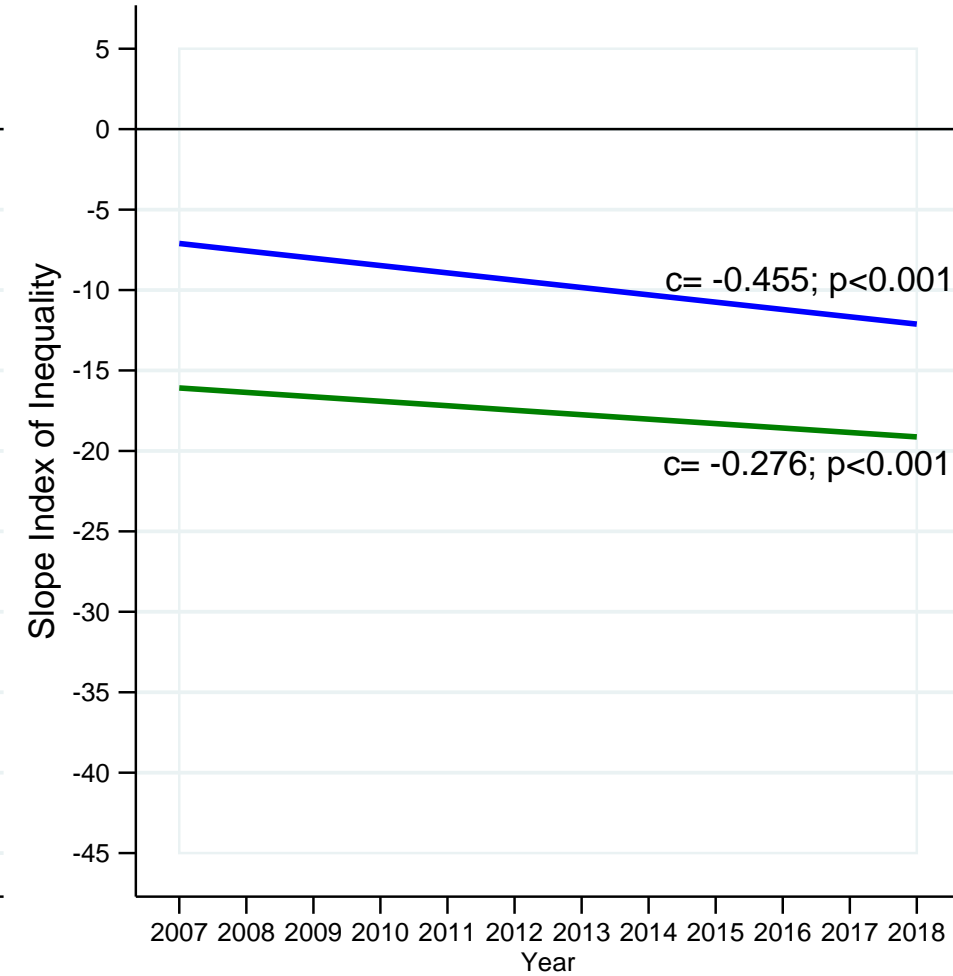

BMJ Open

# Smoking

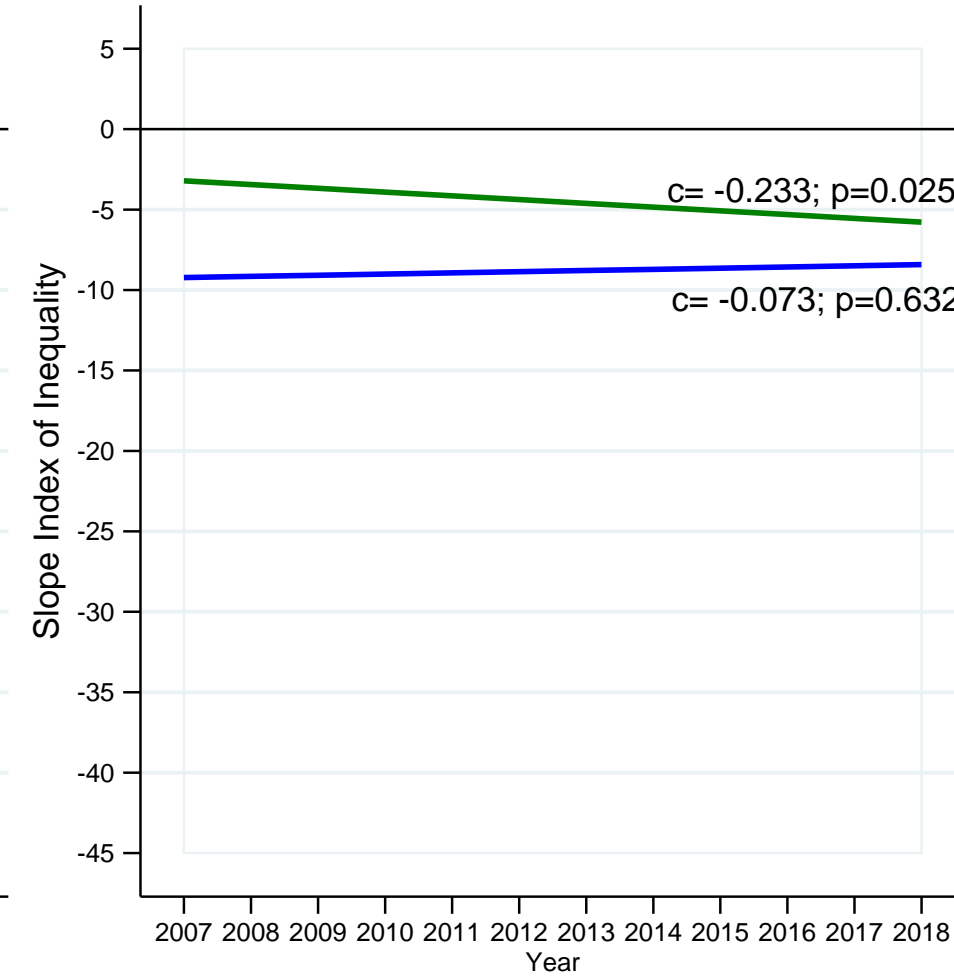

# Obesity

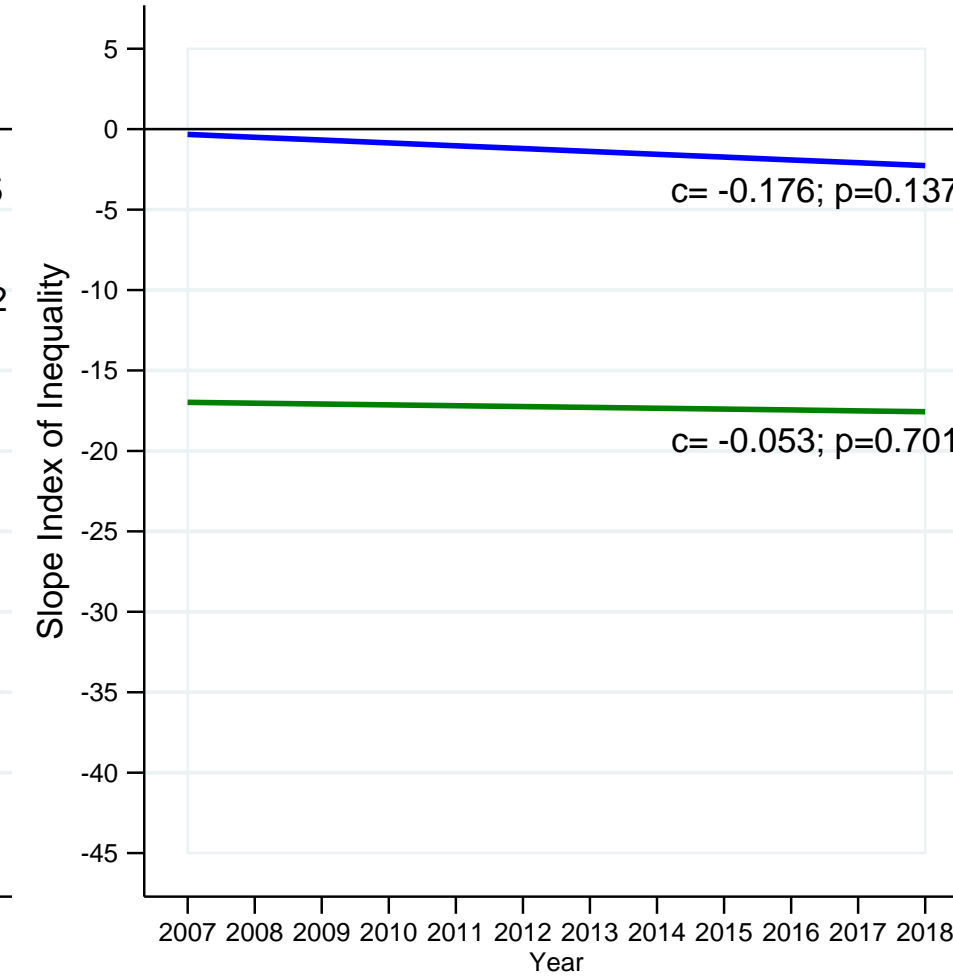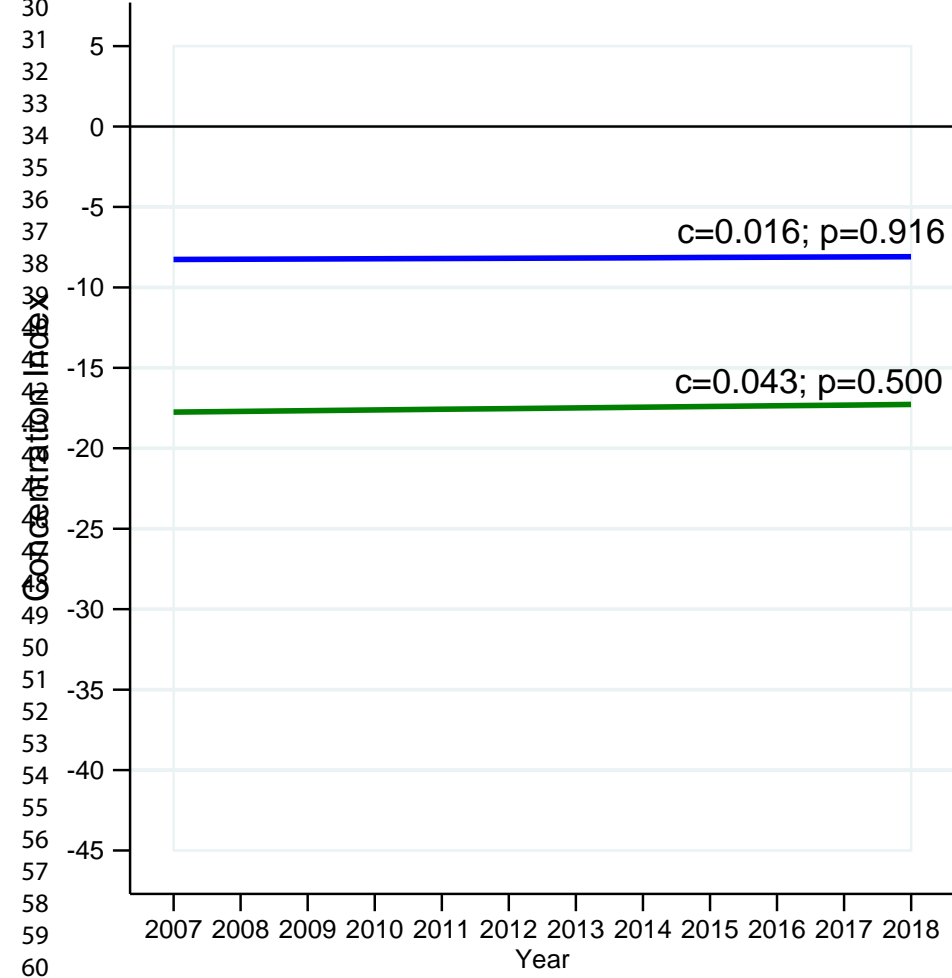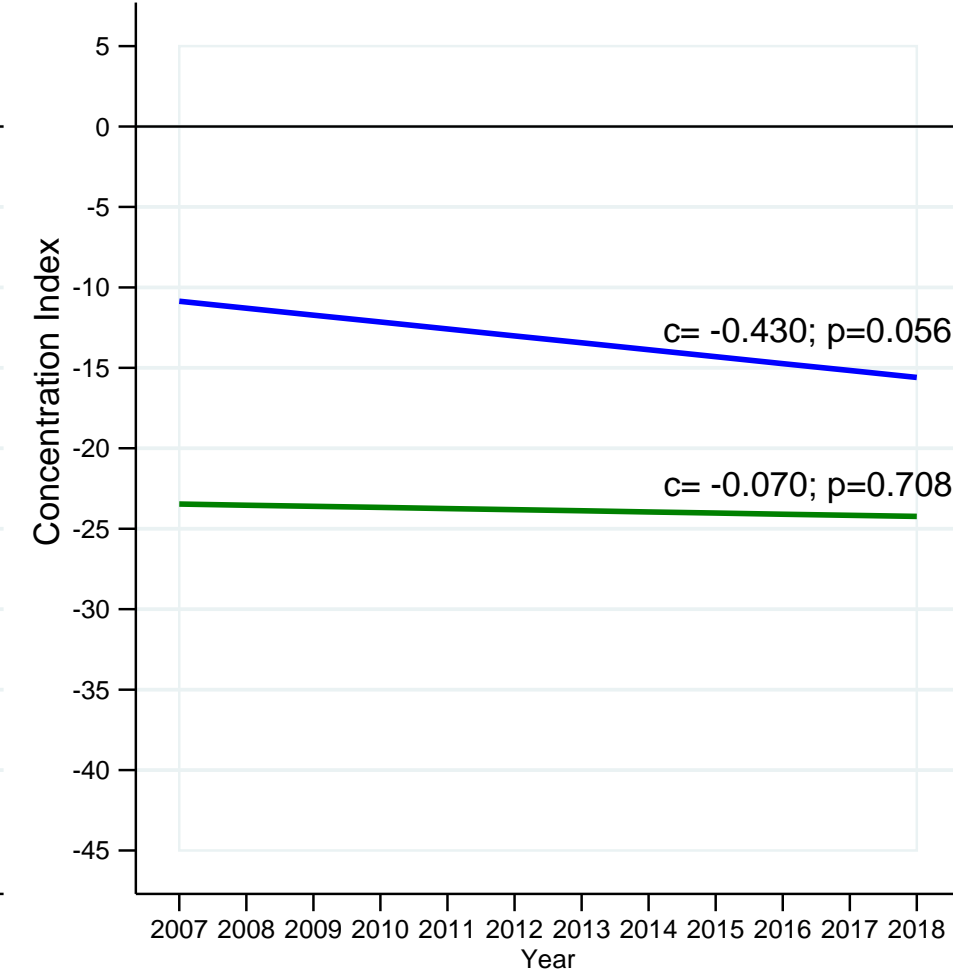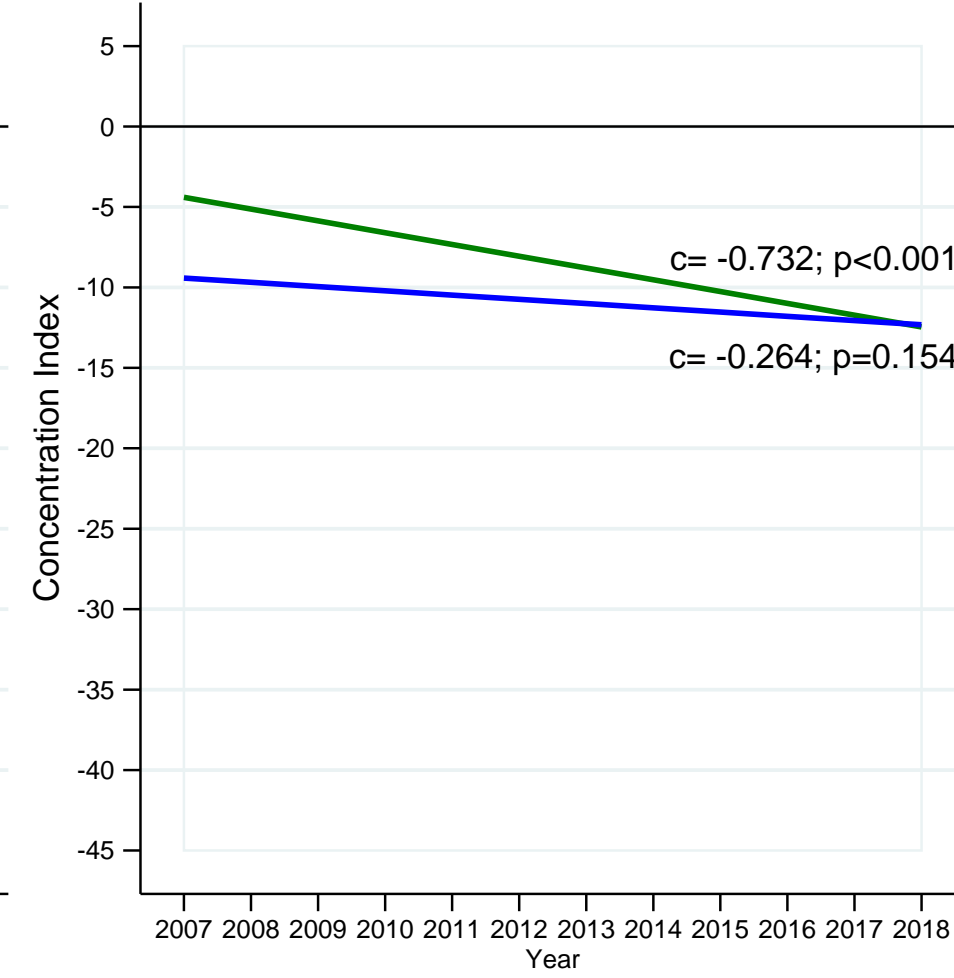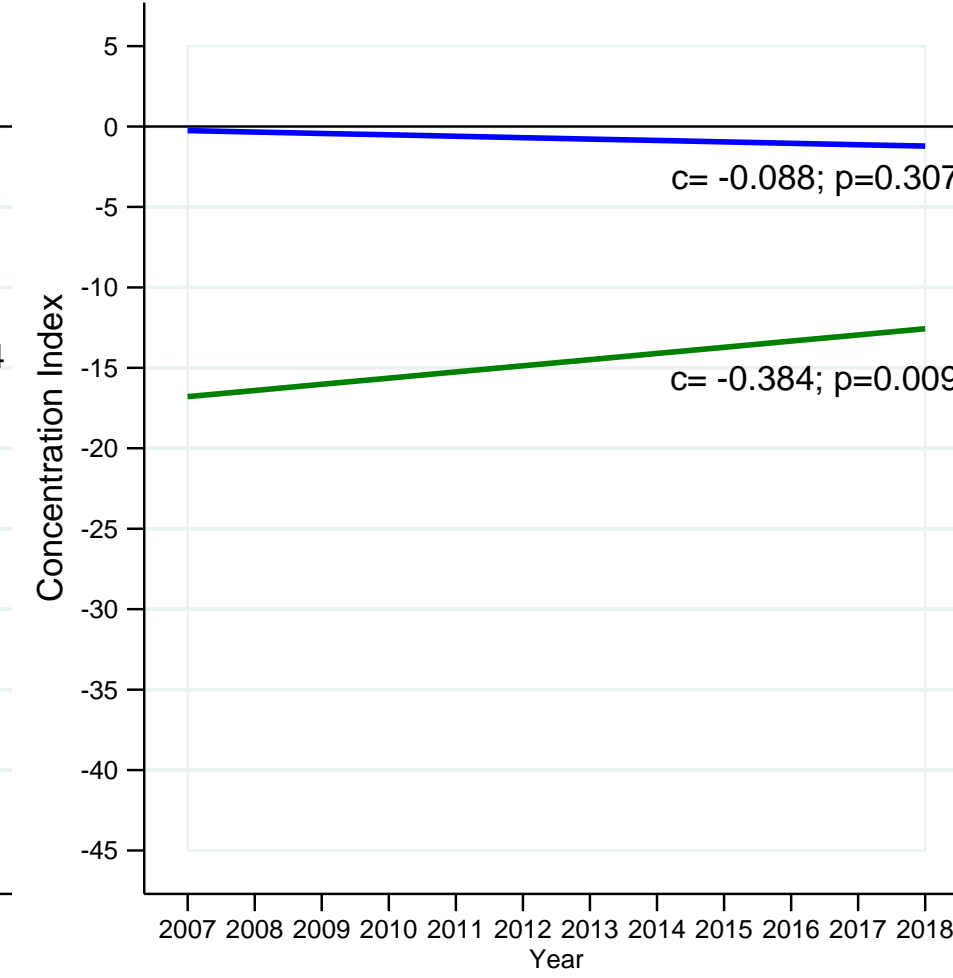

Female Male



# Hypertension

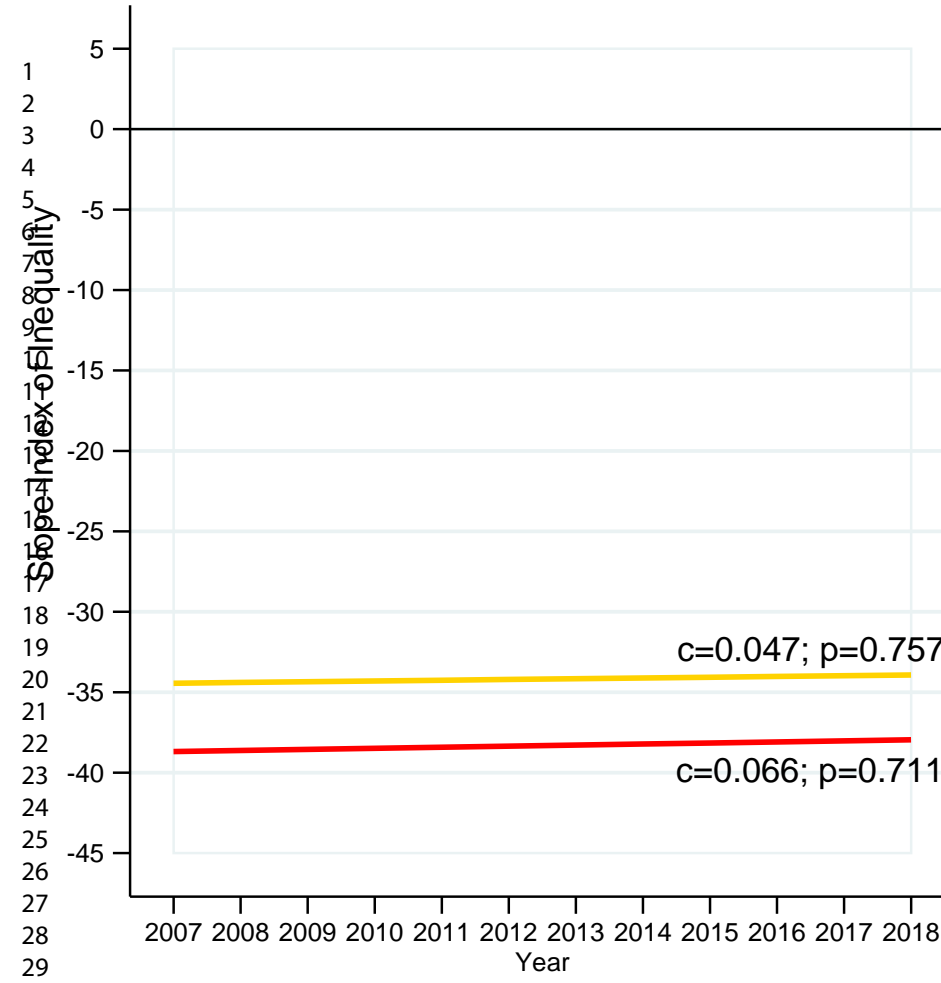

# Diabetes

BMJ Open

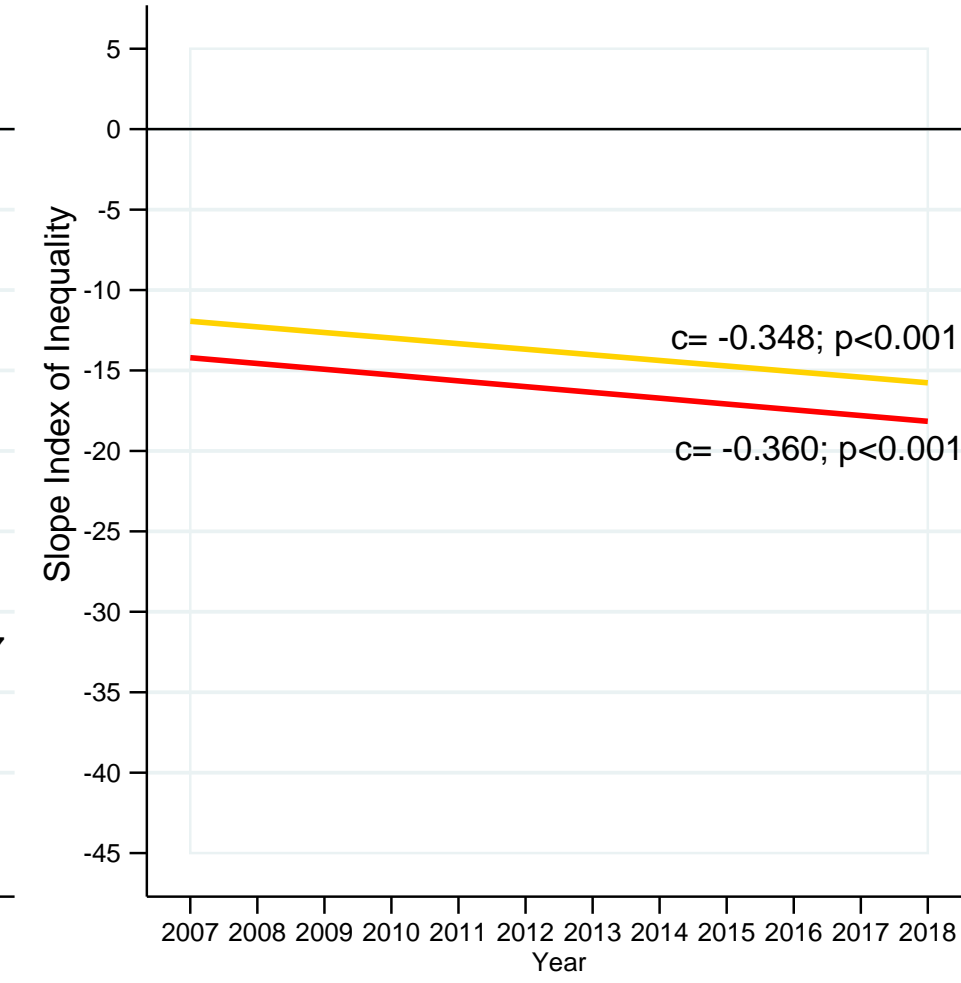

# Smoking

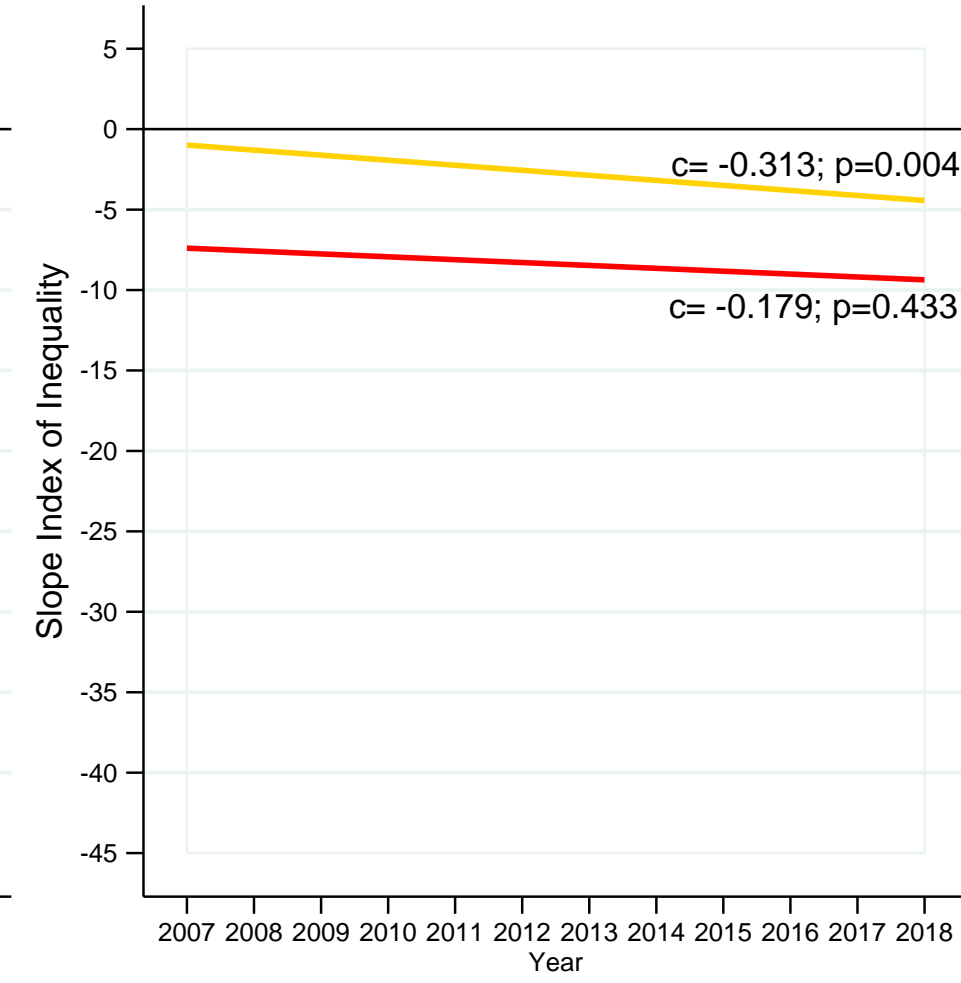

# Obesity

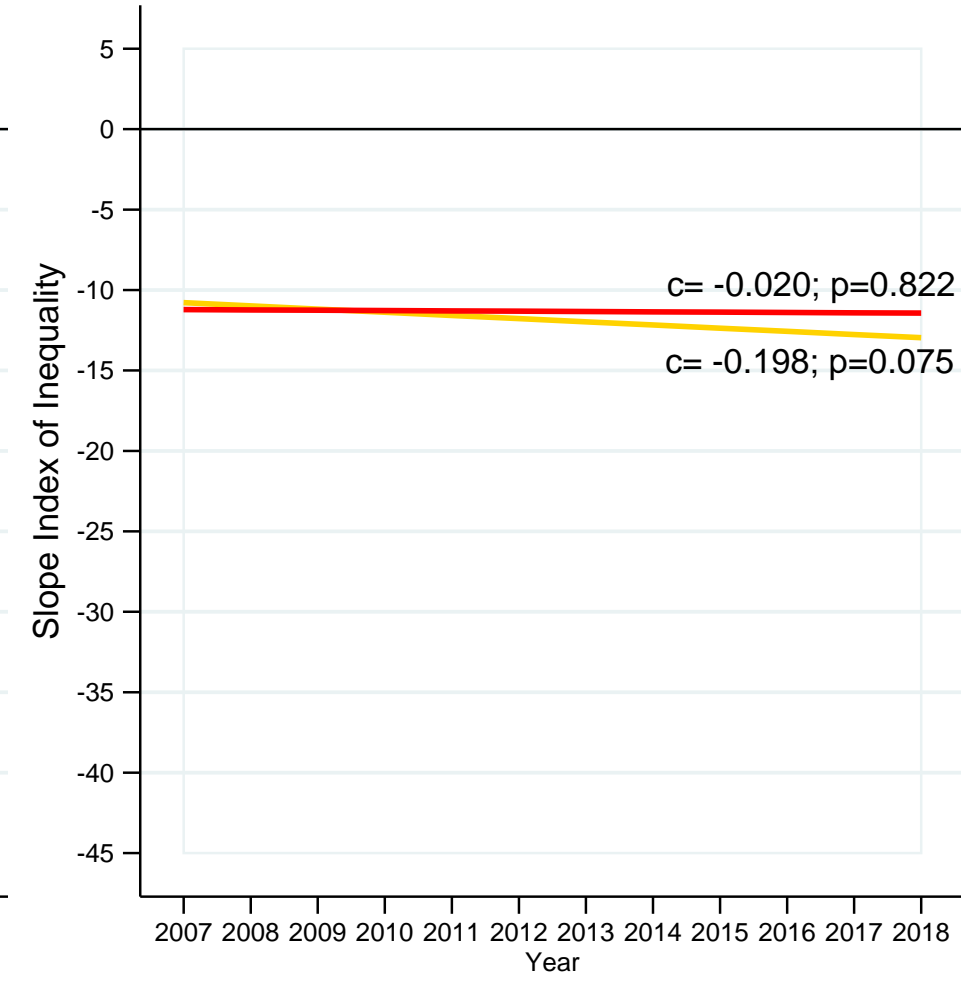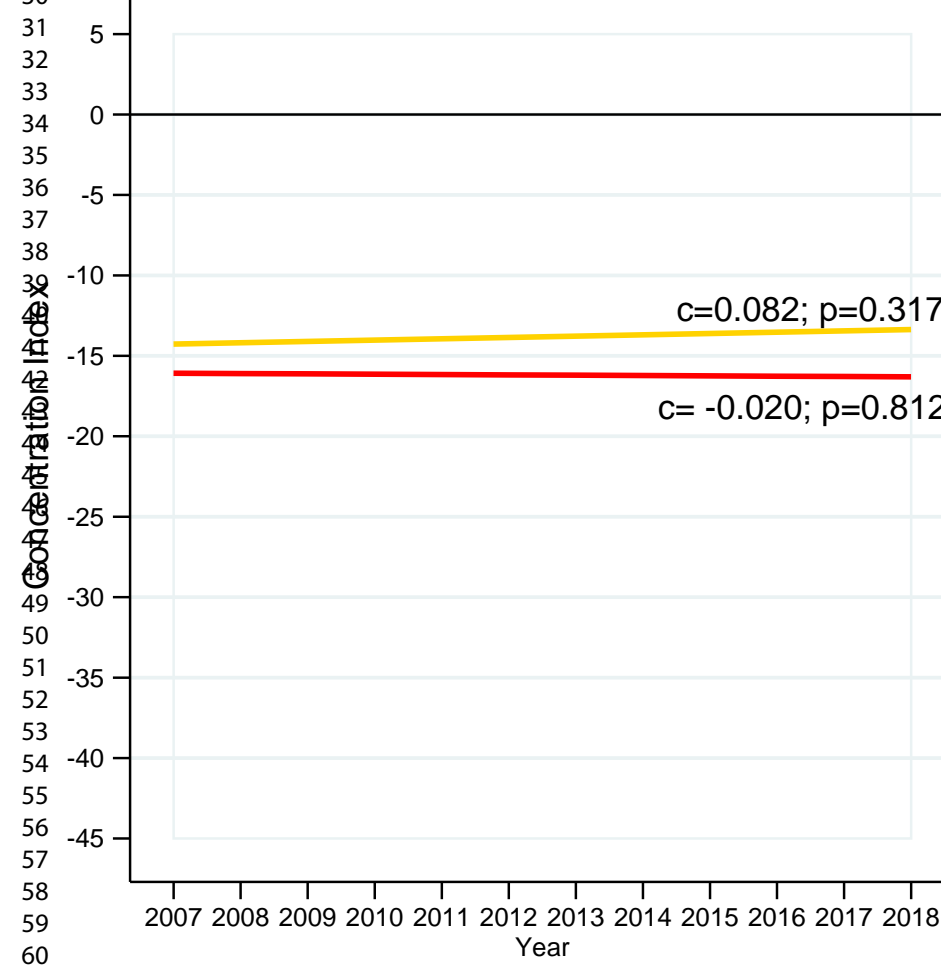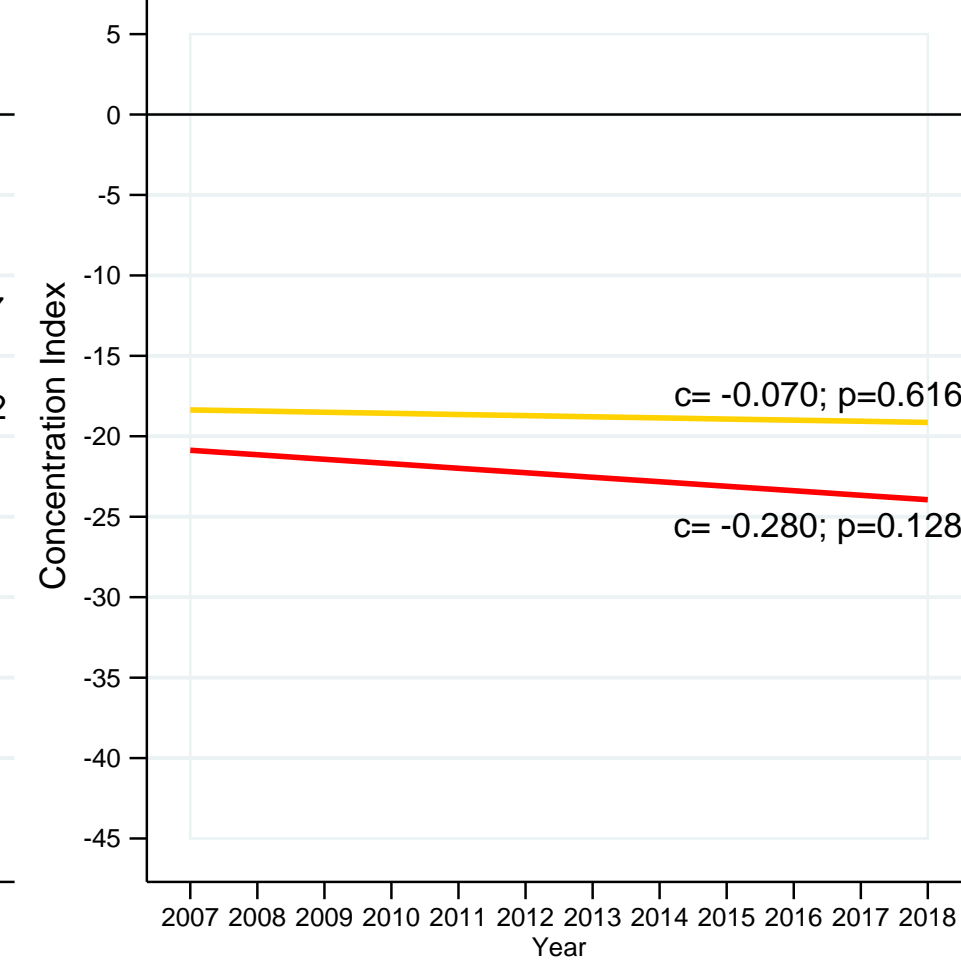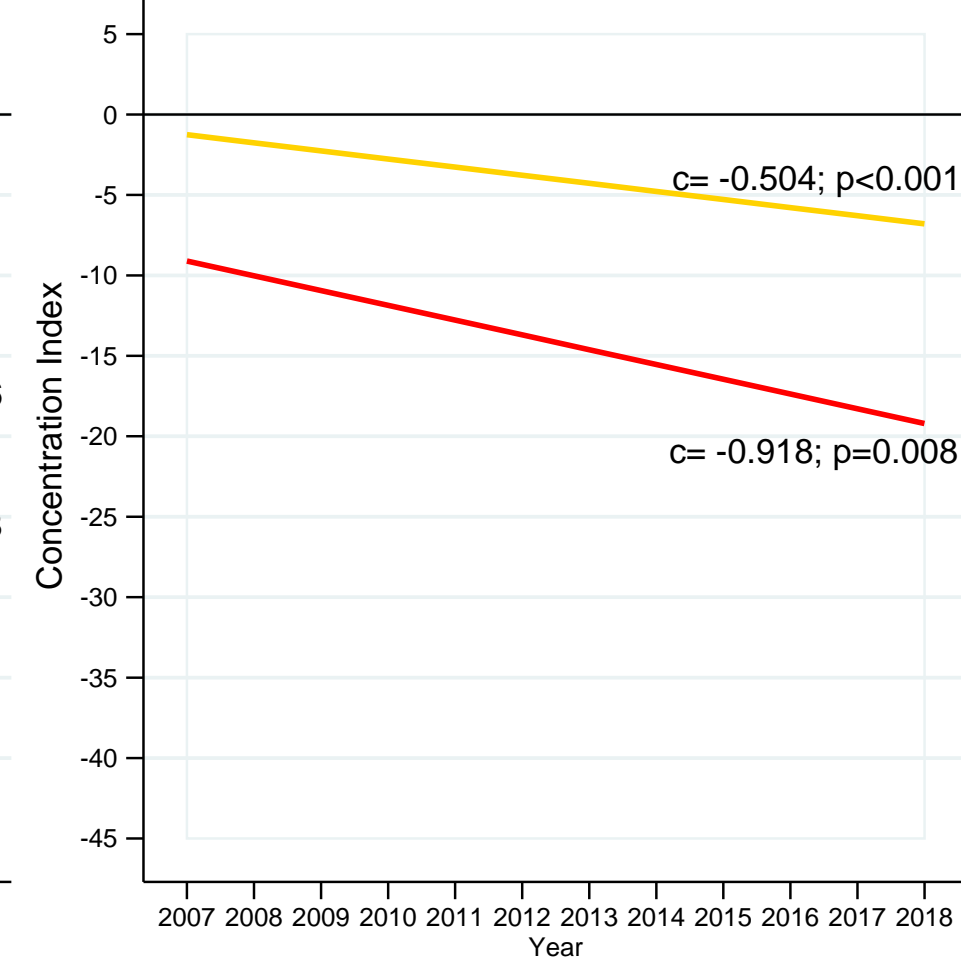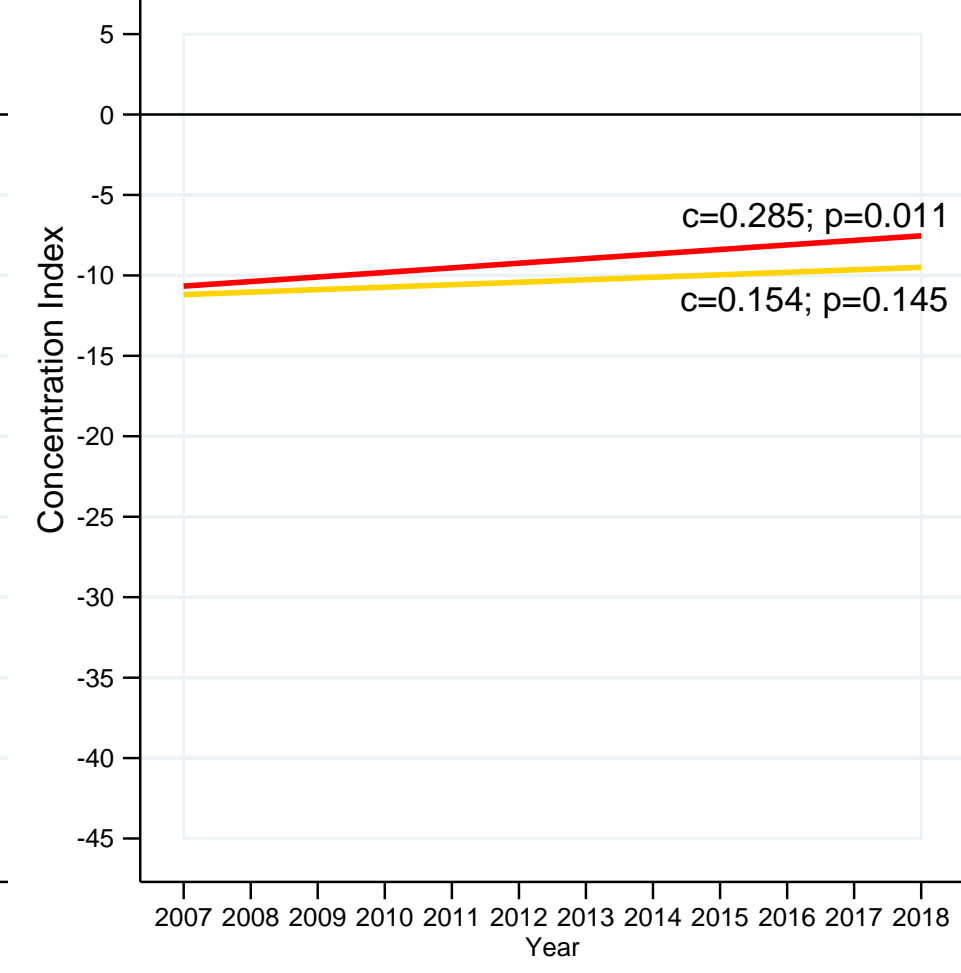

**Supplementary figure 1: Age-standardized prevalence of hypertension, diabetes, smoking and obesity by sex, VIGITEL 2007-2018.**

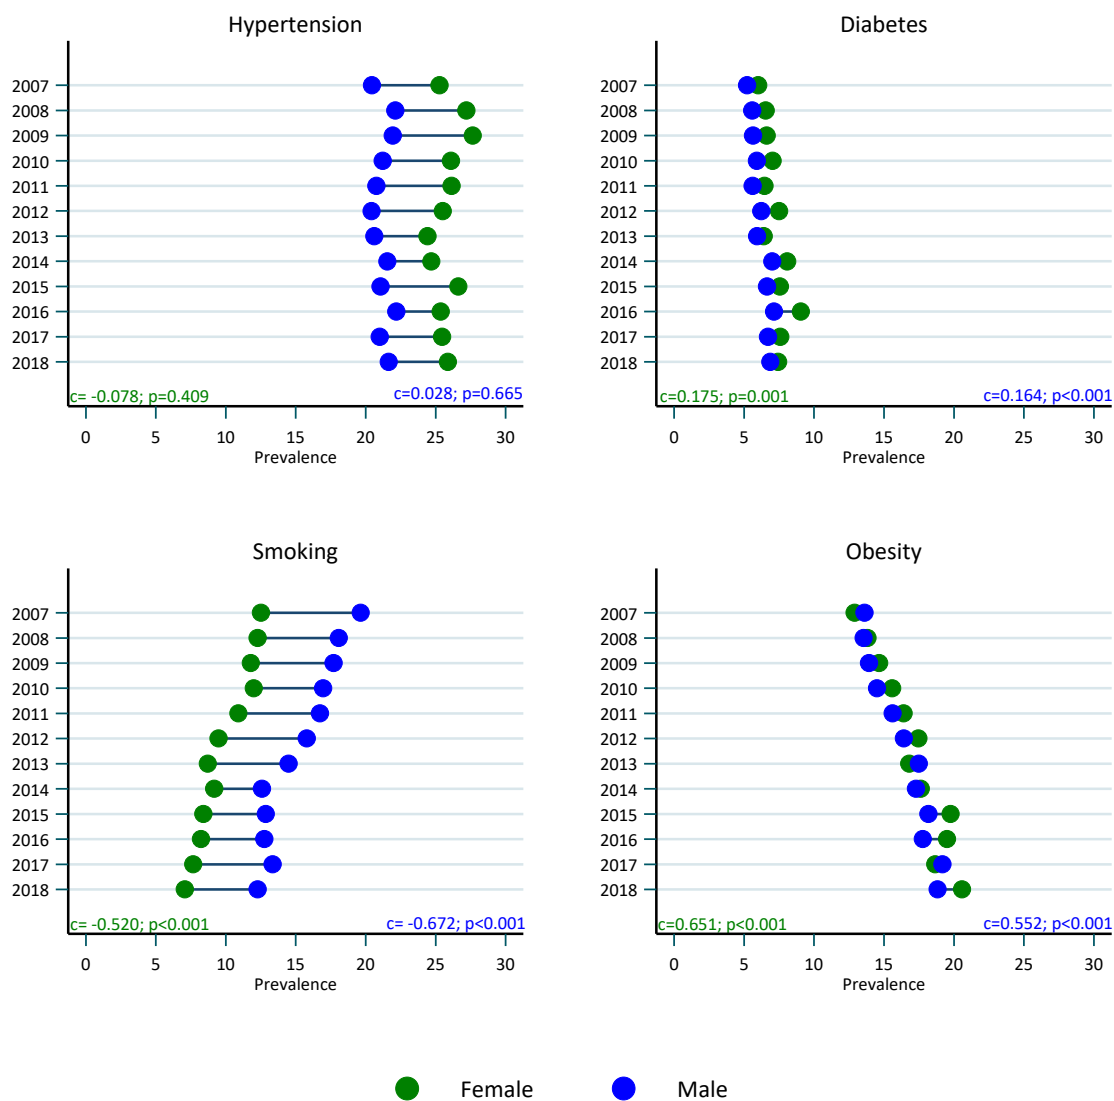

c: annual change (%); p= p-value

**Supplementary figure 2:** Age-standardized prevalence of hypertension, diabetes, smoking and obesity by skin color, VIGITEL 2007-2018.

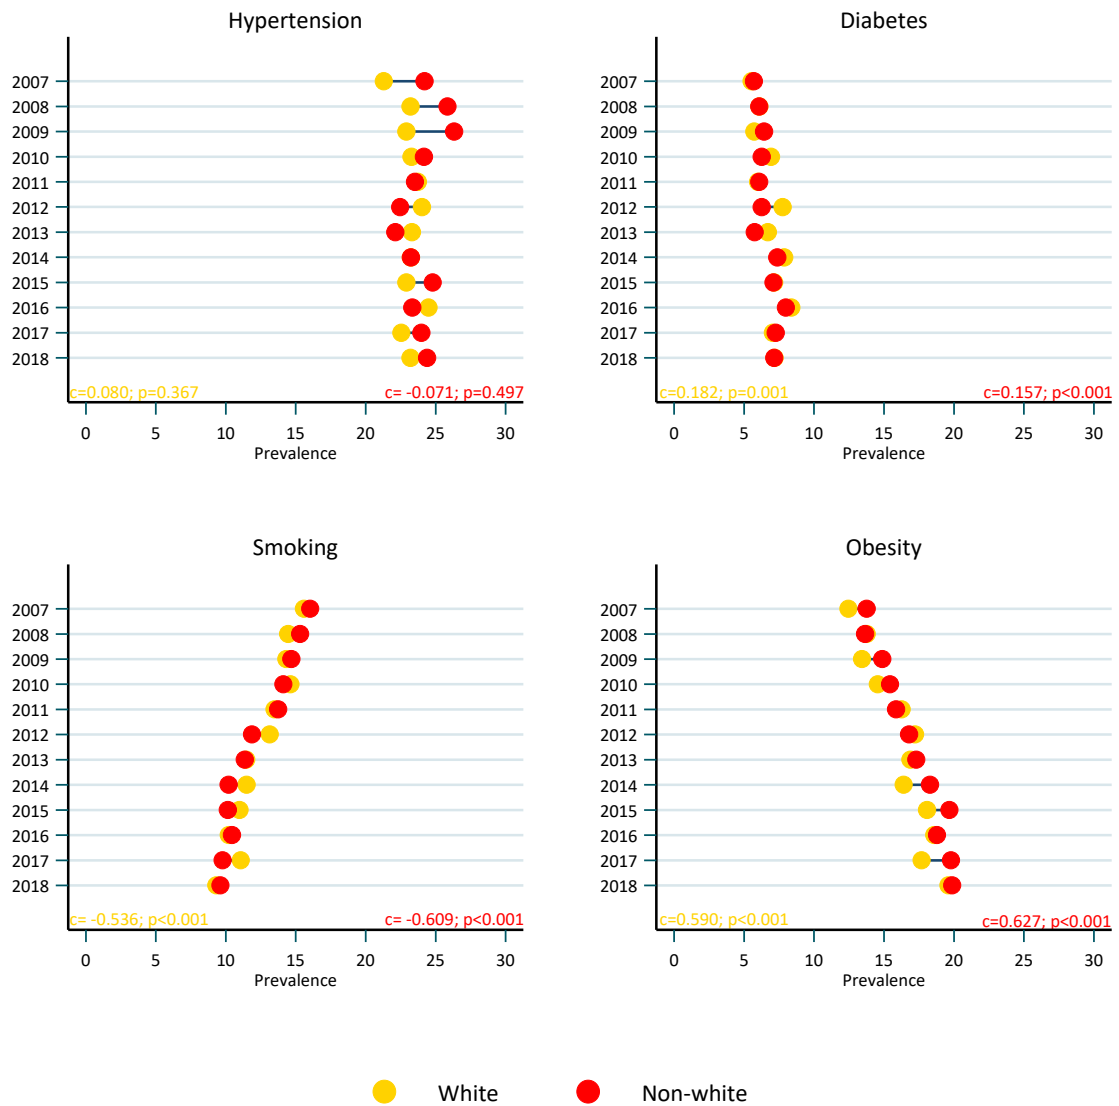

c: annual change (%); p= p-value

**Supplementary Table 1: VIGITEL sociodemographic characteristics and risk factor prevalence by sex, skin and survey year.**

| Characteristics by sex and skin color |           | Survey year and Standard Error |            |            |            |            |            |            |            |            |            |            |            |
|---------------------------------------|-----------|--------------------------------|------------|------------|------------|------------|------------|------------|------------|------------|------------|------------|------------|
|                                       |           | 2007                           | 2008       | 2009       | 2010       | 2011       | 2012       | 2013       | 2014       | 2015       | 2016       | 2017       | 2018       |
| Mean age (years)                      |           |                                |            |            |            |            |            |            |            |            |            |            |            |
|                                       | Female    | 40.6 ± 0.2                     | 40.9 ± 0.2 | 41.2 ± 0.2 | 41.4 ± 0.2 | 41.3 ± 0.2 | 41.2 ± 0.2 | 41.4 ± 0.2 | 41.3 ± 0.2 | 42.3 ± 0.2 | 42.1 ± 0.2 | 42.7 ± 0.2 | 43.0 ± 0.2 |
|                                       | Male      | 38.9 ± 0.2                     | 38.7 ± 0.2 | 39.1 ± 0.2 | 39.1 ± 0.2 | 39.3 ± 0.2 | 38.8 ± 0.2 | 38.8 ± 0.2 | 39.0 ± 0.3 | 39.4 ± 0.2 | 39.2 ± 0.2 | 40.0 ± 0.2 | 40.3 ± 0.2 |
|                                       | White     | 40.4 ± 0.2                     | 40.5 ± 0.2 | 40.8 ± 0.2 | 41.2 ± 0.2 | 41.8 ± 0.2 | 42.1 ± 0.2 | 41.9 ± 0.2 | 42.1 ± 0.2 | 42.1 ± 0.2 | 42.3 ± 0.2 | 42.8 ± 0.2 | 42.8 ± 0.2 |
|                                       | Non-white | 39.3 ± 0.2                     | 39.6 ± 0.2 | 39.9 ± 0.2 | 39.8 ± 0.2 | 39.3 ± 0.2 | 38.6 ± 0.2 | 38.8 ± 0.2 | 38.8 ± 0.2 | 40.1 ± 0.2 | 39.4 ± 0.2 | 40.4 ± 0.2 | 40.9 ± 0.2 |
| Education (years)                     |           |                                |            |            |            |            |            |            |            |            |            |            |            |
|                                       | Female    | 9.4 ± 0.1                      | 9.4 ± 0.1  | 9.7 ± 0.1  | 9.9 ± 0.1  | 9.9 ± 0.1  | 10.4 ± 0.1 | 10.5 ± 0.1 | 10.7 ± 0.1 | 10.6 ± 0.1 | 10.9 ± 0.1 | 10.8 ± 0.1 | 10.9 ± 0.1 |
|                                       | Male      | 9.3 ± 0.1                      | 9.4 ± 0.1  | 9.6 ± 0.1  | 9.7 ± 0.1  | 9.8 ± 0.1  | 10.2 ± 0.1 | 10.3 ± 0.1 | 10.5 ± 0.1 | 10.3 ± 0.1 | 10.7 ± 0.1 | 10.5 ± 0.1 | 10.5 ± 0.1 |
|                                       | White     | 10.6 ± 0.1                     | 10.6 ± 0.1 | 10.8 ± 0.1 | 11.0 ± 0.1 | 10.8 ± 0.1 | 11.1 ± 0.1 | 11.1 ± 0.1 | 11.3 ± 0.1 | 11.5 ± 0.1 | 11.4 ± 0.1 | 11.4 ± 0.1 | 11.7 ± 0.1 |
|                                       | Non-white | 8.5 ± 0.0                      | 8.7 ± 0.0  | 8.9 ± 0.1  | 9.0 ± 0.1  | 9.1 ± 0.1  | 9.7 ± 0.1  | 9.9 ± 0.1  | 10.1 ± 0.1 | 9.7 ± 0.1  | 10.3 ± 0.1 | 10.1 ± 0.1 | 10.0 ± 0.1 |
| Hypertension <sup>+</sup>             |           |                                |            |            |            |            |            |            |            |            |            |            |            |
|                                       | Female    | 25.3 ± 0.5                     | 27.2 ± 0.5 | 27.7 ± 0.5 | 26.1 ± 0.5 | 26.1 ± 0.5 | 25.5 ± 0.5 | 24.4 ± 0.5 | 24.7 ± 0.6 | 26.6 ± 0.5 | 25.4 ± 0.5 | 25.5 ± 0.5 | 25.9 ± 0.5 |
|                                       | Male      | 20.5 ± 0.6                     | 22.1 ± 0.6 | 21.9 ± 0.6 | 21.2 ± 0.6 | 20.8 ± 0.5 | 20.4 ± 0.6 | 20.6 ± 0.6 | 21.6 ± 0.7 | 21.1 ± 0.6 | 22.2 ± 0.6 | 21 ± 0.6   | 21.6 ± 0.6 |
|                                       | White     | 21.3 ± 0.6                     | 23.2 ± 0.6 | 22.9 ± 0.6 | 23.3 ± 0.6 | 23.7 ± 0.6 | 24 ± 0.6   | 23.3 ± 0.6 | 23.2 ± 0.6 | 22.9 ± 0.6 | 24.5 ± 0.6 | 22.6 ± 0.6 | 23.2 ± 0.6 |
|                                       | Non-white | 24.2 ± 0.5                     | 25.8 ± 0.5 | 26.3 ± 0.5 | 24.2 ± 0.5 | 23.5 ± 0.5 | 22.5 ± 0.5 | 22.1 ± 0.5 | 23.2 ± 0.6 | 24.8 ± 0.6 | 23.3 ± 0.5 | 24 ± 0.5   | 24.4 ± 0.5 |
| Diabetes <sup>+</sup>                 |           |                                |            |            |            |            |            |            |            |            |            |            |            |
|                                       | Female    | 6 ± 0.3                        | 6.5 ± 0.3  | 6.6 ± 0.3  | 7 ± 0.3    | 6.4 ± 0.3  | 7.5 ± 0.3  | 6.4 ± 0.3  | 8.1 ± 0.4  | 7.6 ± 0.3  | 9.1 ± 0.4  | 7.6 ± 0.3  | 7.4 ± 0.3  |
|                                       | Male      | 5.2 ± 0.3                      | 5.6 ± 0.3  | 5.6 ± 0.3  | 5.9 ± 0.3  | 5.6 ± 0.3  | 6.2 ± 0.4  | 5.9 ± 0.4  | 7 ± 0.4    | 6.6 ± 0.4  | 7.1 ± 0.4  | 6.7 ± 0.3  | 6.9 ± 0.3  |
|                                       | White     | 5.5 ± 0.3                      | 6.1 ± 0.3  | 5.7 ± 0.4  | 6.9 ± 0.4  | 6 ± 0.3    | 7.7 ± 0.4  | 6.7 ± 0.3  | 7.9 ± 0.4  | 7.2 ± 0.4  | 8.4 ± 0.4  | 7.1 ± 0.3  | 7.2 ± 0.3  |
|                                       | Non-white | 5.7 ± 0.3                      | 6.1 ± 0.3  | 6.4 ± 0.3  | 6.3 ± 0.3  | 6.1 ± 0.3  | 6.3 ± 0.3  | 5.8 ± 0.3  | 7.4 ± 0.4  | 7.1 ± 0.3  | 8 ± 0.3    | 7.3 ± 0.3  | 7.2 ± 0.3  |
| Smoking <sup>+</sup>                  |           |                                |            |            |            |            |            |            |            |            |            |            |            |
|                                       | Female    | 12.5 ± 0.4                     | 12.3 ± 0.4 | 11.8 ± 0.4 | 12 ± 0.4   | 10.9 ± 0.4 | 9.5 ± 0.4  | 8.7 ± 0.4  | 9.2 ± 0.5  | 8.4 ± 0.4  | 8.2 ± 0.4  | 7.7 ± 0.4  | 7.1 ± 0.3  |
|                                       | Male      | 19.6 ± 0.6                     | 18.1 ± 0.6 | 17.7 ± 0.6 | 17 ± 0.6   | 16.7 ± 0.6 | 15.8 ± 0.7 | 14.5 ± 0.6 | 12.6 ± 0.6 | 12.9 ± 0.6 | 12.8 ± 0.6 | 13.3 ± 0.6 | 12.3 ± 0.6 |
|                                       | White     | 15.6 ± 0.5                     | 14.5 ± 0.5 | 14.3 ± 0.5 | 14.6 ± 0.6 | 13.5 ± 0.5 | 13.1 ± 0.6 | 11.5 ± 0.5 | 11.5 ± 0.6 | 11 ± 0.5   | 10.2 ± 0.5 | 11.1 ± 0.6 | 9.3 ± 0.5  |
|                                       | Non-white | 16 ± 0.5                       | 15.3 ± 0.5 | 14.7 ± 0.5 | 14.1 ± 0.5 | 13.7 ± 0.4 | 11.9 ± 0.5 | 11.4 ± 0.5 | 10.2 ± 0.5 | 10.1 ± 0.5 | 10.4 ± 0.5 | 9.8 ± 0.4  | 9.6 ± 0.5  |
| Obesity <sup>+</sup>                  |           |                                |            |            |            |            |            |            |            |            |            |            |            |
|                                       | Female    | 12.9 ± 0.4                     | 13.8 ± 0.4 | 14.6 ± 0.4 | 15.6 ± 0.4 | 16.4 ± 0.4 | 17.5 ± 0.5 | 16.8 ± 0.4 | 17.6 ± 0.5 | 19.8 ± 0.5 | 19.5 ± 0.5 | 18.7 ± 0.5 | 20.6 ± 0.5 |
|                                       | Male      | 13.6 ± 0.5                     | 13.6 ± 0.5 | 13.9 ± 0.5 | 14.5 ± 0.5 | 15.6 ± 0.5 | 16.4 ± 0.6 | 17.5 ± 0.6 | 17.3 ± 0.6 | 18.2 ± 0.6 | 17.8 ± 0.6 | 19.2 ± 0.6 | 18.8 ± 0.6 |
|                                       | White     | 12.5 ± 0.5                     | 13.8 ± 0.5 | 13.4 ± 0.5 | 14.6 ± 0.5 | 16.3 ± 0.5 | 17.2 ± 0.6 | 16.9 ± 0.5 | 16.4 ± 0.6 | 18.1 ± 0.6 | 18.6 ± 0.6 | 17.7 ± 0.6 | 19.6 ± 0.6 |
|                                       | Non-white | 13.8 ± 0.4                     | 13.6 ± 0.4 | 14.9 ± 0.4 | 15.4 ± 0.4 | 15.9 ± 0.4 | 16.8 ± 0.5 | 17.3 ± 0.5 | 18.3 ± 0.6 | 19.7 ± 0.5 | 18.8 ± 0.5 | 19.8 ± 0.5 | 19.9 ± 0.5 |

<sup>+</sup> Age standardized according to 2018 age distribution.

Supplementary table 2: Age-standardized prevalence of hypertension by years of education, sex and skin color, VIGITEL 2007-2018.

| Years fo education     |                   | Survey year (95% CI) |                   |                   |                   |                   |                   |                   |                   |                   |                   |                   | Annual change (%) | p value |  |
|------------------------|-------------------|----------------------|-------------------|-------------------|-------------------|-------------------|-------------------|-------------------|-------------------|-------------------|-------------------|-------------------|-------------------|---------|--|
| Sex and skin color (%) | 2007              | 2008                 | 2009              | 2010              | 2011              | 2012              | 2013              | 2014              | 2015              | 2016              | 2017              | 2018              |                   |         |  |
| 0-3 years              |                   |                      |                   |                   |                   |                   |                   |                   |                   |                   |                   |                   |                   |         |  |
| Total                  | 55.2 (53.3; 57.2) | 58.4 (56.5; 60.3)    | 60.8 (58.8; 62.8) | 59.0 (57.0; 61.0) | 57.0 (55.1; 58.9) | 56.0 (53.5; 58.4) | 56.6 (54.3; 58.9) | 59.8 (57.3; 62.4) | 57.9 (55.9; 59.9) | 61.9 (59.7; 64.1) | 59.2 (57.2; 61.2) | 60.7 (58.8; 62.6) | 0.29              | 0.112   |  |
| Female                 | 58.9 (56.5; 61.2) | 62.4 (60.1; 64.7)    | 64.6 (62.2; 67.0) | 63.0 (60.6; 65.4) | 62.1 (59.9; 64.4) | 60.0 (57.1; 62.9) | 62.2 (59.5; 64.9) | 62.5 (59.5; 65.6) | 62.5 (60.1; 64.9) | 66.7 (64.1; 69.3) | 62.6 (60.3; 65.0) | 63.6 (61.4; 65.9) | 0.25              | 0.179   |  |
| Male                   | 46.2 (42.8; 49.5) | 48.3 (45.0; 51.7)    | 50.7 (47.1; 54.3) | 48.8 (45.2; 52.4) | 43.3 (40.0; 46.7) | 45.1 (40.8; 49.4) | 43.3 (39.3; 47.2) | 52.6 (48.2; 57.1) | 45.3 (41.8; 48.9) | 50.4 (46.5; 54.2) | 50.5 (47.0; 54.0) | 52.9 (49.5; 56.4) | 0.35              | 0.112   |  |
| White                  | 54.6 (50.9; 58.2) | 57.6 (54.0; 61.3)    | 59.0 (55.1; 63.0) | 61.5 (57.7; 65.2) | 58.9 (55.7; 62.0) | 55.8 (51.9; 59.6) | 56.9 (53.4; 60.4) | 56.6 (52.7; 60.5) | 57.2 (53.7; 60.7) | 61.5 (58.2; 64.8) | 58.6 (55.3; 62.0) | 61.6 (58.3; 64.8) | 0.34              | 0.156   |  |
| Non-white              | 55.5 (53.2; 57.9) | 58.8 (56.5; 61.0)    | 61.5 (59.2; 63.8) | 57.9 (55.5; 60.3) | 55.9 (53.6; 58.3) | 56.1 (53.0; 59.2) | 56.3 (53.3; 59.3) | 62.5 (59.1; 65.8) | 58.2 (55.8; 60.7) | 62.3 (59.4; 65.2) | 59.5 (57.1; 62.0) | 60.2 (57.9; 62.5) | 0.30              | 0.083   |  |
| 4-8 years              |                   |                      |                   |                   |                   |                   |                   |                   |                   |                   |                   |                   |                   |         |  |
| Total                  | 44.0 (42.8; 45.2) | 45.4 (44.2; 46.6)    | 46.7 (45.5; 47.9) | 46.9 (45.7; 48.0) | 46.1 (44.9; 47.2) | 47.1 (45.8; 48.4) | 48.8 (47.6; 50.0) | 47.1 (45.8; 48.4) | 47.8 (46.7; 48.9) | 49.6 (48.4; 50.9) | 49.5 (48.4; 50.7) | 49.5 (48.4; 50.6) | 0.45              | <0.001  |  |
| Female                 | 48.3 (46.8; 49.9) | 50.6 (49.1; 52.2)    | 50.4 (48.9; 51.9) | 50.9 (49.4; 52.4) | 51.0 (49.6; 52.5) | 52.1 (50.4; 53.8) | 53.4 (51.9; 54.9) | 51.3 (49.6; 53.0) | 52.7 (51.3; 54.1) | 54.1 (52.6; 55.7) | 53.6 (52.2; 55.0) | 53.5 (52.1; 54.9) | 0.42              | <0.001  |  |
| Male                   | 35.3 (33.4; 37.1) | 34.6 (32.7; 36.4)    | 38.8 (36.9; 40.7) | 38.2 (36.4; 40.1) | 36.2 (34.5; 37.9) | 36.7 (34.6; 38.7) | 38.5 (36.6; 40.4) | 37.9 (35.7; 40.0) | 37.7 (36.0; 39.4) | 40.5 (38.5; 42.4) | 40.9 (39.0; 42.8) | 40.6 (38.8; 42.5) | 0.46              | 0.001   |  |
| White                  | 45.7 (43.6; 47.8) | 48.2 (46.1; 50.3)    | 47.2 (45.0; 49.3) | 48.5 (46.4; 50.6) | 47.8 (45.9; 49.7) | 48.9 (46.9; 51.0) | 51.8 (49.9; 53.6) | 48.0 (45.9; 50.0) | 48.9 (47.0; 50.7) | 50.7 (48.9; 52.5) | 51.4 (49.6; 53.2) | 50.1 (48.3; 51.9) | 0.37              | <0.001  |  |
| Non-white              | 43.0 (41.5; 44.4) | 43.9 (42.4; 45.3)    | 46.4 (44.9; 47.9) | 45.9 (44.5; 47.4) | 44.8 (43.3; 46.3) | 45.6 (43.8; 47.3) | 46.1 (44.5; 47.7) | 46.4 (44.6; 48.2) | 47.2 (45.8; 48.6) | 48.7 (47.1; 50.4) | 48.3 (46.8; 49.7) | 49.1 (47.7; 50.6) | 0.48              | <0.001  |  |
| 9-11 years             |                   |                      |                   |                   |                   |                   |                   |                   |                   |                   |                   |                   |                   |         |  |
| Total                  | 27.2 (26.3; 28.1) | 29.2 (28.3; 30.1)    | 29.6 (28.7; 30.5) | 30.7 (29.9; 31.6) | 29.2 (28.3; 30.0) | 29.3 (28.4; 30.2) | 28.8 (28.0; 29.6) | 29.4 (28.5; 30.3) | 30.0 (29.3; 30.8) | 30.6 (29.8; 31.4) | 29.8 (29.0; 30.6) | 30.3 (29.5; 31.1) | 0.17              | 0.112   |  |
| Female                 | 29.0 (27.8; 30.2) | 31.4 (30.2; 32.6)    | 31.6 (30.4; 32.7) | 32.7 (31.6; 33.9) | 31.0 (29.9; 32.1) | 31.5 (30.3; 32.6) | 31.0 (29.9; 32.1) | 31.3 (30.1; 32.5) | 32.9 (31.9; 33.9) | 32.6 (31.5; 33.7) | 32.0 (31.0; 33.1) | 33.1 (32.0; 34.1) | 0.22              | 0.043   |  |
| Male                   | 24.1 (22.8; 25.4) | 25.5 (24.2; 26.7)    | 26.2 (24.9; 27.5) | 27.1 (25.8; 28.4) | 26.1 (24.9; 27.3) | 25.5 (24.2; 26.8) | 25.2 (24.1; 26.4) | 26.2 (24.9; 27.6) | 25.2 (24.1; 26.3) | 27.2 (26.1; 28.4) | 26.0 (24.9; 27.2) | 25.5 (24.3; 26.6) | 0.07              | 0.496   |  |
| White                  | 27.9 (26.4; 29.4) | 31.4 (29.9; 32.9)    | 31.3 (29.8; 32.7) | 33.1 (31.6; 34.6) | 32.4 (31.0; 33.8) | 33.3 (31.8; 34.7) | 31.1 (29.8; 32.4) | 31.8 (30.4; 33.3) | 31.4 (30.2; 32.7) | 33.4 (32.2; 34.7) | 32.0 (30.7; 33.3) | 31.9 (30.6; 33.1) | 0.21              | 0.276   |  |
| Non-white              | 26.7 (25.6; 27.8) | 27.8 (26.7; 28.9)    | 28.5 (27.5; 29.6) | 29.3 (28.2; 30.3) | 26.8 (25.8; 27.8) | 26.3 (25.2; 27.4) | 27.1 (26.0; 28.1) | 27.7 (26.5; 28.8) | 29.2 (28.2; 30.1) | 28.6 (27.6; 29.6) | 28.5 (27.5; 29.4) | 29.3 (28.3; 30.2) | 0.16              | 0.040   |  |
| 12 or more years       |                   |                      |                   |                   |                   |                   |                   |                   |                   |                   |                   |                   |                   |         |  |
| Total                  | 23.7 (22.7; 24.6) | 25.0 (24.0; 25.9)    | 25.0 (24.1; 25.9) | 25.6 (24.7; 26.5) | 25.3 (24.4; 26.2) | 24.4 (23.5; 25.3) | 23.8 (23.0; 24.6) | 25.1 (24.2; 26.0) | 25.2 (24.5; 25.9) | 25.3 (24.6; 26.0) | 24.6 (23.9; 25.3) | 23.8 (23.1; 24.4) | -0.01             | 0.954   |  |
| Female                 | 22.4 (21.1; 23.6) | 23.9 (22.7; 25.1)    | 24.3 (23.2; 25.5) | 25.4 (24.3; 26.5) | 24.3 (23.2; 25.5) | 23.9 (22.7; 25.0) | 23.0 (22.0; 24.0) | 25.0 (23.8; 26.2) | 25.2 (24.2; 26.1) | 24.7 (23.8; 25.6) | 24.0 (23.2; 24.9) | 23.6 (22.8; 24.5) | 0.08              | 0.504   |  |
| Male                   | 25.7 (24.3; 27.1) | 26.6 (25.2; 28.0)    | 26.0 (24.6; 27.4) | 26.0 (24.6; 27.3) | 26.9 (25.6; 28.2) | 25.4 (24.0; 26.8) | 25.2 (24.0; 26.4) | 25.3 (23.8; 26.7) | 25.2 (24.1; 26.4) | 26.3 (25.2; 27.4) | 25.6 (24.5; 26.6) | 24.0 (23.0; 25.1) | -0.12             | 0.092   |  |
| White                  | 24.7 (23.4; 26.0) | 25.2 (23.9; 26.4)    | 24.7 (23.5; 26.0) | 26.7 (25.5; 27.9) | 26.4 (25.2; 27.6) | 25.4 (24.1; 26.6) | 25.9 (24.8; 27.0) | 26.7 (25.4; 27.9) | 26.8 (25.8; 27.9) | 27.1 (26.1; 28.0) | 26.0 (25.1; 27.0) | 25.0 (24.0; 25.9) | 0.08              | 0.424   |  |
| Non-white              | 22.3 (21.0; 23.6) | 24.7 (23.4; 26.0)    | 25.3 (24.0; 26.6) | 24.2 (23.0; 25.5) | 23.8 (22.5; 25.0) | 23.2 (21.9; 24.5) | 21.1 (20.0; 22.1) | 23.3 (22.0; 24.6) | 23.2 (22.2; 24.2) | 23.2 (22.2; 24.2) | 23.0 (22.0; 23.9) | 22.5 (21.5; 23.4) | -0.11             | 0.357   |  |

**Supplementary table 3: Age-standardized prevalence of diabetes by years of education, sex and skin color, VIGITEL 2007-2018.**

| Sex and skin color (%)  | Survey year (95% CI) |                   |                   |                   |                   |                   |                   |                   |                   |                   |                   |                   | Annual change (%) | p value |
|-------------------------|----------------------|-------------------|-------------------|-------------------|-------------------|-------------------|-------------------|-------------------|-------------------|-------------------|-------------------|-------------------|-------------------|---------|
|                         | 2007                 | 2008              | 2009              | 2010              | 2011              | 2012              | 2013              | 2014              | 2015              | 2016              | 2017              | 2018              |                   |         |
| <b>0-3 years</b>        |                      |                   |                   |                   |                   |                   |                   |                   |                   |                   |                   |                   |                   |         |
| Total                   | 17.2 (15.6; 18.7)    | 18.8 (17.2; 20.4) | 20.3 (18.5; 22.0) | 19.9 (18.2; 21.6) | 20.0 (18.4; 21.6) | 20.0 (18.0; 22.0) | 19.7 (17.8; 21.5) | 23.6 (21.4; 25.9) | 22.1 (20.3; 23.8) | 25.9 (23.9; 28.0) | 22.4 (20.8; 24.1) | 24.4 (22.7; 26.0) | 0.60              | <0.001  |
| Female                  | 18.2 (16.3; 20.1)    | 20.1 (18.1; 22.1) | 21.4 (19.2; 23.6) | 20.8 (18.6; 22.9) | 21.7 (19.8; 23.7) | 21.8 (19.3; 24.3) | 21.7 (19.3; 24.1) | 25.6 (22.7; 28.4) | 23.7 (21.6; 25.9) | 28.1 (25.6; 30.6) | 24.0 (22.0; 26.1) | 25.8 (23.8; 27.9) | 0.67              | <0.001  |
| Male                    | 14.6 (12.3; 16.9)    | 15.6 (13.1; 18.0) | 17.2 (14.3; 20.1) | 17.7 (14.9; 20.4) | 15.3 (12.8; 17.7) | 15.2 (12.0; 18.4) | 14.8 (12.0; 17.5) | 18.6 (15.1; 22.0) | 17.5 (14.8; 20.2) | 20.7 (17.6; 23.8) | 18.5 (15.8; 21.2) | 20.6 (17.9; 23.4) | 0.45              | 0.001   |
| White                   | 15.7 (13.1; 18.4)    | 18.3 (15.4; 21.1) | 20.2 (16.8; 23.6) | 20.3 (16.9; 23.6) | 18.1 (15.6; 20.5) | 18.0 (15.1; 20.9) | 19.4 (16.5; 22.2) | 23.2 (19.8; 26.6) | 22.5 (19.5; 25.5) | 25.2 (22.2; 28.1) | 21.7 (18.9; 24.5) | 21.5 (18.8; 24.2) | 0.55              | 0.014   |
| Non-white               | 17.8 (16.0; 19.7)    | 19.1 (17.2; 21.0) | 20.3 (18.2; 22.3) | 19.7 (17.7; 21.7) | 21.1 (19.1; 23.1) | 21.5 (18.8; 24.3) | 19.9 (17.4; 22.4) | 24.0 (20.9; 27.0) | 21.8 (19.7; 23.9) | 26.6 (23.9; 29.4) | 22.9 (20.8; 24.9) | 25.9 (23.8; 28.0) | 0.62              | <0.001  |
| <b>4-8 years</b>        |                      |                   |                   |                   |                   |                   |                   |                   |                   |                   |                   |                   |                   |         |
| Total                   | 11.5 (10.7; 12.4)    | 12.0 (11.2; 12.9) | 13.5 (12.6; 14.4) | 14.0 (13.1; 14.9) | 14.4 (13.5; 15.3) | 14.6 (13.7; 15.6) | 15.4 (14.5; 16.3) | 16.8 (15.8; 17.9) | 15.8 (15.0; 16.6) | 19.0 (18.0; 20.0) | 17.2 (16.3; 18.0) | 17.7 (16.8; 18.5) | 0.60              | <0.001  |
| Female                  | 12.4 (11.3; 13.5)    | 13.1 (12.0; 14.2) | 13.8 (12.7; 15.0) | 14.7 (13.6; 15.8) | 15.8 (14.7; 17.0) | 15.0 (13.8; 16.3) | 16.0 (14.8; 17.2) | 17.3 (16.0; 18.6) | 16.6 (15.6; 17.7) | 20.2 (18.9; 21.4) | 17.7 (16.6; 18.8) | 18.0 (17.0; 19.1) | 0.58              | <0.001  |
| Male                    | 9.8 (8.7; 11.0)      | 9.8 (8.6; 11.0)   | 12.7 (11.3; 14.1) | 12.5 (11.2; 13.9) | 11.7 (10.5; 12.9) | 13.8 (12.3; 15.3) | 14.1 (12.7; 15.6) | 15.7 (14.1; 17.4) | 14.0 (12.8; 15.2) | 16.7 (15.2; 18.1) | 16.1 (14.7; 17.5) | 16.8 (15.4; 18.2) | 0.63              | <0.001  |
| White                   | 12.3 (10.8; 13.7)    | 12.7 (11.2; 14.2) | 13.9 (12.3; 15.4) | 15.5 (13.9; 17.1) | 15.3 (13.9; 16.8) | 14.1 (12.7; 15.6) | 16.5 (15.0; 17.9) | 17.0 (15.4; 18.5) | 15.8 (14.5; 17.2) | 20.6 (19.1; 22.0) | 17.6 (16.3; 19.0) | 18.3 (16.9; 19.7) | 0.58              | <0.001  |
| Non-white               | 11.1 (10.1; 12.1)    | 11.6 (10.6; 12.6) | 13.3 (12.2; 14.4) | 13.1 (12.1; 14.2) | 13.8 (12.7; 14.9) | 15.0 (13.7; 16.3) | 14.5 (13.3; 15.7) | 16.7 (15.4; 18.1) | 15.7 (14.7; 16.8) | 17.6 (16.4; 18.9) | 16.9 (15.8; 18.0) | 17.3 (16.2; 18.4) | 0.59              | <0.001  |
| <b>9-11 years</b>       |                      |                   |                   |                   |                   |                   |                   |                   |                   |                   |                   |                   |                   |         |
| Total                   | 6.5 (6.0; 7.1)       | 7.1 (6.6; 7.7)    | 7.6 (7.1; 8.2)    | 8.4 (7.9; 9.0)    | 7.8 (7.3; 8.3)    | 8.4 (7.8; 9.0)    | 7.7 (7.2; 8.2)    | 8.9 (8.3; 9.5)    | 8.8 (8.3; 9.3)    | 10.4 (9.8; 10.9)  | 8.9 (8.4; 9.3)    | 8.9 (8.5; 9.4)    | 0.23              | 0.001   |
| Female                  | 6.7 (6.0; 7.4)       | 7.3 (6.5; 8.0)    | 7.8 (7.0; 8.5)    | 8.9 (8.1; 9.6)    | 7.9 (7.2; 8.6)    | 8.6 (7.9; 9.4)    | 7.9 (7.3; 8.6)    | 9.1 (8.3; 9.9)    | 9.4 (8.7; 10.0)   | 11.0 (10.3; 11.7) | 8.9 (8.3; 9.5)    | 9.1 (8.5; 9.7)    | 0.24              | 0.003   |
| Male                    | 6.3 (5.5; 7.0)       | 6.8 (6.0; 7.7)    | 7.4 (6.6; 8.2)    | 7.6 (6.8; 8.4)    | 7.6 (6.8; 8.3)    | 8.0 (7.1; 8.8)    | 7.3 (6.6; 8.1)    | 8.6 (7.7; 9.5)    | 7.7 (7.1; 8.4)    | 9.4 (8.6; 10.1)   | 8.8 (8.1; 9.5)    | 8.6 (7.9; 9.4)    | 0.21              | <0.001  |
| White                   | 6.9 (6.0; 7.8)       | 8.3 (7.3; 9.4)    | 8.0 (7.1; 9.0)    | 9.8 (8.8; 10.8)   | 9.1 (8.2; 10.0)   | 9.3 (8.4; 10.2)   | 8.6 (7.8; 9.5)    | 9.7 (8.8; 10.7)   | 9.5 (8.7; 10.3)   | 11.5 (10.6; 12.4) | 9.8 (9.0; 10.6)   | 9.5 (8.7; 10.3)   | 0.23              | 0.009   |
| Non-white               | 6.3 (5.6; 7.0)       | 6.4 (5.7; 7.0)    | 7.4 (6.7; 8.0)    | 7.6 (6.9; 8.2)    | 6.8 (6.2; 7.5)    | 7.7 (7.0; 8.4)    | 7.0 (6.4; 7.6)    | 8.3 (7.5; 9.0)    | 8.3 (7.7; 8.9)    | 9.6 (8.9; 10.3)   | 8.3 (7.7; 8.8)    | 8.6 (8.0; 9.2)    | 0.23              | <0.001  |
| <b>12 or more years</b> |                      |                   |                   |                   |                   |                   |                   |                   |                   |                   |                   |                   |                   |         |
| Total                   | 5.6 (5.1; 6.2)       | 5.7 (5.1; 6.2)    | 6.6 (6.0; 7.1)    | 6.8 (6.3; 7.4)    | 6.3 (5.7; 6.8)    | 6.2 (5.7; 6.8)    | 5.8 (5.4; 6.2)    | 6.7 (6.2; 7.3)    | 6.4 (6.0; 6.8)    | 8.4 (8.0; 8.9)    | 6.6 (6.2; 7.0)    | 6.4 (6.0; 6.7)    | 0.10              | 0.094   |
| Female                  | 4.7 (4.0; 5.3)       | 4.7 (4.1; 5.3)    | 5.9 (5.1; 6.6)    | 6.5 (5.8; 7.2)    | 5.6 (5.0; 6.2)    | 6.0 (5.3; 6.7)    | 5.4 (4.8; 5.9)    | 6.7 (6.0; 7.5)    | 6.1 (5.6; 6.7)    | 7.9 (7.4; 8.5)    | 6.1 (5.6; 6.6)    | 6.1 (5.6; 6.5)    | 0.15              | 0.028   |
| Male                    | 7.1 (6.2; 8.1)       | 7.2 (6.3; 8.1)    | 7.7 (6.8; 8.6)    | 7.4 (6.6; 8.3)    | 7.4 (6.5; 8.2)    | 6.6 (5.8; 7.5)    | 6.6 (5.9; 7.3)    | 6.7 (5.9; 7.6)    | 6.9 (6.2; 7.5)    | 9.3 (8.5; 10.0)   | 7.6 (6.9; 8.2)    | 6.9 (6.2; 7.5)    | 0.02              | 0.748   |
| White                   | 5.7 (4.9; 6.4)       | 5.6 (4.9; 6.3)    | 6.7 (5.9; 7.5)    | 7.1 (6.4; 7.8)    | 6.7 (6.0; 7.5)    | 6.3 (5.6; 7.0)    | 6.4 (5.8; 7.1)    | 7.3 (6.5; 8.1)    | 7.0 (6.4; 7.6)    | 9.3 (8.6; 9.9)    | 7.2 (6.7; 7.8)    | 6.8 (6.2; 7.3)    | 0.16              | 0.041   |
| Non-white               | 5.6 (4.8; 6.4)       | 5.7 (5.0; 6.5)    | 6.4 (5.6; 7.2)    | 6.5 (5.8; 7.3)    | 5.6 (4.9; 6.3)    | 6.2 (5.4; 6.9)    | 5.0 (4.4; 5.6)    | 6.1 (5.3; 6.8)    | 5.8 (5.2; 6.3)    | 7.4 (6.8; 8.0)    | 6.0 (5.4; 6.5)    | 5.9 (5.3; 6.4)    | 0.03              | 0.447   |

Supplementary table 4: Age-standardized prevalence of smoking by years of education, sex and skin color, VIGITEL 2007-2018.

| Years fo education     |                   | Survey year (95% CI) |                   |                   |                   |                   |                   |                   |                   |                   |                   |                   | Annual change (%) | p value |  |
|------------------------|-------------------|----------------------|-------------------|-------------------|-------------------|-------------------|-------------------|-------------------|-------------------|-------------------|-------------------|-------------------|-------------------|---------|--|
| Sex and skin color (%) | 2007              | 2008                 | 2009              | 2010              | 2011              | 2012              | 2013              | 2014              | 2015              | 2016              | 2017              | 2018              |                   |         |  |
| 0-3 years              |                   |                      |                   |                   |                   |                   |                   |                   |                   |                   |                   |                   |                   |         |  |
| Total                  | 13.0 (11.7; 14.2) | 12.9 (11.6; 14.1)    | 12.6 (11.3; 13.9) | 11.6 (10.4; 12.9) | 12.4 (11.2; 13.6) | 11.0 (9.5; 12.4)  | 11.8 (10.3; 13.3) | 11.7 (10.1; 13.4) | 9.9 (8.7; 11.1)   | 11.8 (10.2; 13.3) | 9.8 (8.6; 11.0)   | 9.0 (7.9; 10.2)   | -0.29             | <0.001  |  |
| Female                 | 10.7 (9.3; 12.1)  | 11.1 (9.7; 12.6)     | 10.9 (9.4; 12.4)  | 10.9 (9.3; 12.4)  | 10.1 (8.8; 11.5)  | 9.5 (7.9; 11.2)   | 9.7 (8.1; 11.4)   | 10.4 (8.4; 12.3)  | 8.3 (7.0; 9.7)    | 10.3 (8.5; 12.1)  | 8.5 (7.0; 9.9)    | 9.0 (7.6; 10.4)   | -0.22             | <0.001  |  |
| Male                   | 18.6 (16.0; 21.2) | 17.4 (15.0; 19.8)    | 17.1 (14.5; 19.6) | 13.6 (11.3; 15.9) | 18.5 (15.9; 21.0) | 14.8 (11.8; 17.8) | 16.7 (13.8; 19.7) | 15.3 (12.1; 18.5) | 14.3 (11.8; 16.8) | 15.3 (12.4; 18.2) | 13.3 (10.9; 15.6) | 9.1 (7.1; 11.1)   | -0.54             | 0.005   |  |
| White                  | 10.4 (8.2; 12.5)  | 9.9 (7.8; 11.9)      | 10.9 (8.5; 13.3)  | 9.7 (7.5; 11.9)   | 11.4 (9.4; 13.3)  | 11.4 (9.0; 13.9)  | 10.2 (8.2; 12.3)  | 10.7 (8.2; 13.1)  | 8.2 (6.3; 10.0)   | 9.4 (7.4; 11.4)   | 8.2 (6.3; 10.0)   | 8.1 (6.2; 10.0)   | -0.21             | 0.013   |  |
| Non-white              | 14.1 (12.6; 15.7) | 14.2 (12.6; 15.7)    | 13.2 (11.6; 14.7) | 12.5 (10.9; 14.0) | 13.0 (11.5; 14.6) | 10.6 (8.8; 12.4)  | 13.1 (11.0; 15.2) | 12.6 (10.3; 14.8) | 10.9 (9.3; 12.4)  | 13.8 (11.6; 16.1) | 10.8 (9.2; 12.3)  | 9.5 (8.1; 11.0)   | -0.28             | 0.004   |  |
| 4-8 years              |                   |                      |                   |                   |                   |                   |                   |                   |                   |                   |                   |                   |                   |         |  |
| Total                  | 14.4 (13.6; 15.1) | 15.0 (14.2; 15.8)    | 14.7 (13.9; 15.5) | 14.3 (13.5; 15.1) | 13.6 (12.9; 14.4) | 13.5 (12.6; 14.4) | 11.4 (10.7; 12.2) | 11.7 (10.8; 12.5) | 10.4 (9.7; 11.1)  | 10.8 (10.1; 11.6) | 10.0 (9.3; 10.7)  | 10.8 (10.1; 11.5) | -0.47             | <0.001  |  |
| Female                 | 11.6 (10.6; 12.5) | 12.6 (11.7; 13.6)    | 12.7 (11.7; 13.6) | 12.2 (11.3; 13.2) | 10.9 (10.0; 11.8) | 11.3 (10.2; 12.3) | 9.5 (8.6; 10.4)   | 9.9 (8.9; 10.8)   | 8.8 (8.0; 9.6)    | 8.7 (7.8; 9.6)    | 8.0 (7.2; 8.8)    | 9.1 (8.2; 9.9)    | -0.40             | 0.001   |  |
| Male                   | 19.9 (18.5; 21.3) | 19.9 (18.4; 21.3)    | 19.0 (17.6; 20.4) | 18.6 (17.2; 20.0) | 19.0 (17.6; 20.4) | 18.1 (16.6; 19.7) | 15.7 (14.2; 17.1) | 15.7 (14.1; 17.3) | 13.7 (12.5; 15.0) | 15.1 (13.7; 16.5) | 14.2 (12.9; 15.6) | 14.6 (13.2; 16.0) | -0.59             | <0.001  |  |
| White                  | 13.7 (12.4; 15.1) | 13.2 (11.9; 14.5)    | 13.4 (12.0; 14.8) | 12.7 (11.3; 14.0) | 12.7 (11.5; 13.9) | 12.1 (10.8; 13.4) | 10.8 (9.7; 11.9)  | 10.4 (9.2; 11.7)  | 10.5 (9.4; 11.7)  | 10.5 (9.4; 11.6)  | 9.8 (8.7; 11.0)   | 10.0 (8.9; 11.1)  | -0.38             | <0.001  |  |
| Non-white              | 14.7 (13.8; 15.7) | 16.0 (15.0; 17.0)    | 15.4 (14.4; 16.4) | 15.2 (14.2; 16.1) | 14.3 (13.3; 15.3) | 14.6 (13.5; 15.8) | 12.0 (11.0; 13.0) | 12.7 (11.5; 13.8) | 10.3 (9.5; 11.2)  | 11.1 (10.1; 12.1) | 10.1 (9.2; 10.9)  | 11.3 (10.4; 12.3) | -0.54             | <0.001  |  |
| 9-11 years             |                   |                      |                   |                   |                   |                   |                   |                   |                   |                   |                   |                   |                   |         |  |
| Total                  | 12.9 (12.3; 13.6) | 11.4 (10.8; 11.9)    | 11.4 (10.9; 12.0) | 10.8 (10.3; 11.4) | 10.4 (9.9; 10.9)  | 9.5 (8.9; 10.0)   | 8.8 (8.3; 9.3)    | 8.2 (7.7; 8.8)    | 8.0 (7.6; 8.5)    | 7.7 (7.3; 8.2)    | 7.4 (7.0; 7.9)    | 7.3 (6.9; 7.7)    | -0.51             | <0.001  |  |
| Female                 | 11.2 (10.5; 12.0) | 9.6 (8.9; 10.3)      | 9.4 (8.7; 10.1)   | 9.7 (9.1; 10.4)   | 8.9 (8.2; 9.5)    | 8.0 (7.4; 8.7)    | 7.1 (6.5; 7.7)    | 7.1 (6.4; 7.7)    | 6.4 (5.9; 7.0)    | 6.7 (6.1; 7.2)    | 6.1 (5.5; 6.6)    | 5.9 (5.4; 6.4)    | -0.47             | <0.001  |  |
| Male                   | 15.9 (14.9; 16.9) | 14.4 (13.4; 15.3)    | 14.9 (13.9; 15.9) | 12.8 (11.9; 13.7) | 12.9 (12.0; 13.7) | 12.0 (11.1; 13.0) | 11.6 (10.8; 12.5) | 10.2 (9.3; 11.0)  | 10.7 (9.9; 11.5)  | 9.5 (8.7; 10.3)   | 9.7 (8.9; 10.5)   | 9.7 (8.9; 10.5)   | -0.58             | <0.001  |  |
| White                  | 13.3 (12.3; 14.3) | 12.1 (11.1; 13.1)    | 12.2 (11.3; 13.2) | 12.4 (11.4; 13.3) | 11.3 (10.4; 12.2) | 10.9 (10.0; 11.9) | 9.6 (8.8; 10.4)   | 9.4 (8.5; 10.3)   | 9.3 (8.5; 10.1)   | 8.6 (7.8; 9.3)    | 8.8 (8.0; 9.6)    | 8.5 (7.7; 9.3)    | -0.46             | <0.001  |  |
| Non-white              | 12.7 (11.9; 13.4) | 10.9 (10.2; 11.6)    | 10.9 (10.2; 11.6) | 9.8 (9.2; 10.5)   | 9.8 (9.1; 10.4)   | 8.4 (7.7; 9.0)    | 8.2 (7.6; 8.8)    | 7.4 (6.7; 8.1)    | 7.3 (6.8; 7.8)    | 7.2 (6.6; 7.8)    | 6.6 (6.1; 7.1)    | 6.5 (6.0; 7.1)    | -0.54             | <0.001  |  |
| 12 or more years       |                   |                      |                   |                   |                   |                   |                   |                   |                   |                   |                   |                   |                   |         |  |
| Total                  | 11.8 (11.1; 12.4) | 10.7 (10.0; 11.3)    | 9.9 (9.3; 10.5)   | 9.1 (8.6; 9.7)    | 9.1 (8.5; 9.6)    | 8.0 (7.4; 8.6)    | 6.8 (6.3; 7.2)    | 6.8 (6.3; 7.4)    | 6.6 (6.2; 7.0)    | 6.3 (5.9; 6.7)    | 6.2 (5.8; 6.6)    | 5.6 (5.2; 5.9)    | -0.55             | <0.001  |  |
| Female                 | 10.1 (9.3; 10.9)  | 9.4 (8.6; 10.2)      | 9.1 (8.4; 9.9)    | 8.1 (7.4; 8.8)    | 8.2 (7.5; 8.9)    | 6.8 (6.1; 7.6)    | 6.0 (5.4; 6.5)    | 6.1 (5.4; 6.8)    | 5.6 (5.1; 6.1)    | 5.0 (4.5; 5.5)    | 5.2 (4.7; 5.7)    | 4.5 (4.1; 5.0)    | -0.51             | <0.001  |  |
| Male                   | 14.3 (13.3; 15.4) | 12.7 (11.6; 13.7)    | 11.2 (10.2; 12.1) | 10.9 (9.9; 11.8)  | 10.5 (9.6; 11.4)  | 10.0 (9.1; 11.0)  | 8.2 (7.4; 8.9)    | 8.1 (7.2; 9.1)    | 8.2 (7.4; 8.9)    | 8.5 (7.8; 9.2)    | 7.9 (7.2; 8.6)    | 7.3 (6.7; 8.0)    | -0.60             | <0.001  |  |
| White                  | 12.3 (11.4; 13.1) | 12.0 (11.1; 12.9)    | 11.4 (10.5; 12.2) | 10.3 (9.5; 11.1)  | 10.0 (9.3; 10.8)  | 9.4 (8.5; 10.2)   | 7.8 (7.1; 8.5)    | 8.7 (7.8; 9.5)    | 8.0 (7.3; 8.6)    | 7.2 (6.6; 7.8)    | 7.4 (6.8; 8.0)    | 6.6 (6.1; 7.2)    | -0.52             | <0.001  |  |
| Non-white              | 11.1 (10.2; 12.1) | 9.0 (8.2; 9.8)       | 8.1 (7.4; 8.9)    | 7.7 (6.9; 8.4)    | 7.7 (6.9; 8.5)    | 6.2 (5.5; 7.0)    | 5.5 (4.9; 6.0)    | 4.6 (4.0; 5.3)    | 4.9 (4.4; 5.5)    | 5.2 (4.7; 5.7)    | 4.8 (4.3; 5.3)    | 4.4 (3.9; 4.9)    | -0.58             | <0.001  |  |

**Supplementary table 5: Age-standardized prevalence of obesity by years of education, sex and skin color, VIGITEL 2007-2018.**

| Years fo education     |                   | Survey year (95% CI) |                   |                   |                   |                   |                   |                   |                   |                   |                   |                   | Annual change (%) | p value |  |
|------------------------|-------------------|----------------------|-------------------|-------------------|-------------------|-------------------|-------------------|-------------------|-------------------|-------------------|-------------------|-------------------|-------------------|---------|--|
| Sex and skin color (%) | 2007              | 2008                 | 2009              | 2010              | 2011              | 2012              | 2013              | 2014              | 2015              | 2016              | 2017              | 2018              |                   |         |  |
| 0-3 years              |                   |                      |                   |                   |                   |                   |                   |                   |                   |                   |                   |                   |                   |         |  |
| Total                  | 21.3 (19.6; 22.9) | 23.2 (21.5; 24.9)    | 22.7 (21.0; 24.5) | 22.7 (20.9; 24.4) | 24.1 (22.4; 25.7) | 25.6 (23.4; 27.7) | 23.5 (21.5; 25.4) | 26.5 (24.2; 28.8) | 26.8 (24.9; 28.6) | 27.6 (25.6; 29.6) | 27.1 (25.3; 28.9) | 28.4 (26.7; 30.2) | 0.60              | <0.001  |  |
| Female                 | 23.8 (21.7; 25.8) | 26.8 (24.7; 28.9)    | 25.2 (23.0; 27.4) | 25.3 (23.2; 27.5) | 27.1 (25.1; 29.2) | 28.9 (26.1; 31.6) | 26.2 (23.7; 28.7) | 29.6 (26.7; 32.5) | 29.4 (27.2; 31.7) | 30.3 (27.7; 32.8) | 29.6 (27.4; 31.9) | 31.2 (29.1; 33.4) | 0.57              | <0.001  |  |
| Male                   | 15.0 (12.7; 17.3) | 14.1 (11.8; 16.3)    | 16.2 (13.6; 18.9) | 15.9 (13.4; 18.4) | 16.0 (13.5; 18.4) | 16.8 (13.6; 19.9) | 17.0 (14.1; 19.8) | 18.4 (15.0; 21.7) | 19.5 (16.7; 22.3) | 21.2 (18.1; 24.3) | 20.8 (18.0; 23.6) | 21.1 (18.4; 23.8) | 0.65              | <0.001  |  |
| White                  | 20.5 (17.6; 23.4) | 23.3 (20.1; 26.4)    | 20.3 (17.0; 23.6) | 21.4 (18.3; 24.6) | 24.6 (21.8; 27.4) | 24.5 (21.1; 27.9) | 24.3 (21.2; 27.4) | 26.3 (22.8; 29.9) | 25.9 (22.8; 29.0) | 28.2 (25.1; 31.2) | 26.7 (23.7; 29.7) | 26.6 (23.7; 29.6) | 0.64              | <0.001  |  |
| Non-white              | 21.6 (19.7; 23.6) | 23.2 (21.2; 25.2)    | 23.7 (21.6; 25.8) | 23.2 (21.2; 25.3) | 23.8 (21.8; 25.8) | 26.3 (23.5; 29.2) | 22.8 (20.3; 25.4) | 26.6 (23.6; 29.7) | 27.2 (25.0; 29.5) | 27.1 (24.4; 29.8) | 27.4 (25.1; 29.6) | 29.4 (27.2; 31.6) | 0.58              | <0.001  |  |
| 4-8 years              |                   |                      |                   |                   |                   |                   |                   |                   |                   |                   |                   |                   |                   |         |  |
| Total                  | 17.0 (16.2; 17.9) | 18.7 (17.7; 19.6)    | 19.3 (18.4; 20.3) | 20.2 (19.3; 21.1) | 20.6 (19.7; 21.6) | 22.0 (20.9; 23.1) | 22.4 (21.4; 23.4) | 22.8 (21.7; 23.9) | 23.9 (22.9; 24.8) | 24.6 (23.6; 25.6) | 23.9 (22.9; 24.8) | 24.5 (23.6; 25.5) | 0.67              | <0.001  |  |
| Female                 | 17.9 (16.7; 19.0) | 20.4 (19.2; 21.7)    | 20.5 (19.2; 21.7) | 21.3 (20.1; 22.5) | 22.1 (20.8; 23.3) | 23.8 (22.3; 25.2) | 23.6 (22.3; 24.9) | 24.7 (23.3; 26.2) | 25.7 (24.5; 26.9) | 25.9 (24.5; 27.2) | 24.5 (23.3; 25.7) | 26.4 (25.1; 27.6) | 0.70              | <0.001  |  |
| Male                   | 15.4 (14.1; 16.7) | 15.0 (13.7; 16.2)    | 16.9 (15.4; 18.3) | 17.9 (16.5; 19.2) | 17.8 (16.5; 19.1) | 18.3 (16.8; 19.9) | 19.8 (18.3; 21.4) | 18.6 (16.9; 20.3) | 20.2 (18.8; 21.6) | 22.0 (20.4; 23.6) | 22.5 (20.9; 24.1) | 20.5 (19.0; 22.0) | 0.62              | <0.001  |  |
| White                  | 16.7 (15.1; 18.2) | 19.3 (17.6; 21.0)    | 19.4 (17.7; 21.1) | 20.4 (18.7; 22.1) | 20.3 (18.8; 21.8) | 22.0 (20.3; 23.7) | 21.9 (20.4; 23.5) | 22.8 (21.0; 24.5) | 23.8 (22.2; 25.4) | 24.6 (23.0; 26.1) | 23.5 (21.9; 25.0) | 24.4 (22.9; 26.0) | 0.65              | <0.001  |  |
| Non-white              | 17.3 (16.2; 18.3) | 18.3 (17.2; 19.5)    | 19.3 (18.1; 20.4) | 20.1 (19.0; 21.2) | 20.8 (19.7; 22.0) | 22.0 (20.6; 23.4) | 22.9 (21.5; 24.2) | 22.8 (21.4; 24.3) | 24.0 (22.8; 25.1) | 24.6 (23.2; 26.0) | 24.1 (22.9; 25.4) | 24.6 (23.4; 25.9) | 0.68              | <0.001  |  |
| 9-11 years             |                   |                      |                   |                   |                   |                   |                   |                   |                   |                   |                   |                   |                   |         |  |
| Total                  | 12.8 (12.2; 13.4) | 13.9 (13.2; 14.5)    | 14.4 (13.8; 15.1) | 16.0 (15.3; 16.6) | 16.5 (15.9; 17.1) | 17.4 (16.7; 18.1) | 17.5 (16.8; 18.1) | 18.5 (17.8; 19.3) | 18.7 (18.1; 19.3) | 19.1 (18.4; 19.8) | 18.5 (17.9; 19.2) | 19.6 (18.9; 20.2) | 0.60              | <0.001  |  |
| Female                 | 12.2 (11.3; 13.0) | 13.5 (12.6; 14.3)    | 14.2 (13.4; 15.1) | 15.6 (14.8; 16.5) | 16.2 (15.3; 17.0) | 17.5 (16.6; 18.4) | 17.2 (16.3; 18.0) | 18.8 (17.8; 19.8) | 19.1 (18.3; 19.9) | 19.3 (18.5; 20.2) | 18.6 (17.7; 19.4) | 19.9 (19.0; 20.7) | 0.68              | <0.001  |  |
| Male                   | 14.0 (13.1; 14.9) | 14.5 (13.6; 15.4)    | 14.8 (13.8; 15.7) | 16.6 (15.6; 17.6) | 17.0 (16.0; 17.9) | 17.2 (16.2; 18.3) | 17.9 (16.9; 18.9) | 18.1 (17.0; 19.2) | 18.0 (17.0; 18.9) | 18.7 (17.7; 19.7) | 18.5 (17.4; 19.5) | 19.0 (18.0; 20.1) | 0.46              | <0.001  |  |
| White                  | 12.8 (11.7; 13.8) | 14.0 (12.9; 15.1)    | 14.3 (13.2; 15.3) | 15.8 (14.7; 16.9) | 16.9 (15.8; 18.0) | 18.1 (16.9; 19.2) | 16.9 (15.9; 18.0) | 18.5 (17.3; 19.7) | 18.1 (17.1; 19.2) | 18.4 (17.4; 19.5) | 17.6 (16.6; 18.6) | 18.9 (17.8; 20.0) | 0.52              | 0.001   |  |
| Non-white              | 12.9 (12.1; 13.6) | 13.8 (13.0; 14.6)    | 14.5 (13.8; 15.3) | 16.1 (15.3; 16.9) | 16.2 (15.4; 17.0) | 16.9 (16.0; 17.8) | 17.9 (17.0; 18.7) | 18.6 (17.6; 19.5) | 19.0 (18.2; 19.8) | 19.6 (18.7; 20.4) | 19.1 (18.3; 19.9) | 20.0 (19.1; 20.8) | 0.64              | <0.001  |  |
| 12 or more years       |                   |                      |                   |                   |                   |                   |                   |                   |                   |                   |                   |                   |                   |         |  |
| Total                  | 11.6 (11.0; 12.3) | 11.5 (10.9; 12.1)    | 12.8 (12.1; 13.4) | 13.3 (12.7; 13.9) | 14.7 (14.1; 15.4) | 14.9 (14.2; 15.6) | 15.2 (14.6; 15.8) | 15.0 (14.2; 15.7) | 15.1 (14.6; 15.7) | 15.6 (15.1; 16.2) | 16.1 (15.5; 16.7) | 16.8 (16.2; 17.4) | 0.46              | <0.001  |  |
| Female                 | 9.4 (8.6; 10.2)   | 9.4 (8.6; 10.1)      | 11.3 (10.5; 12.2) | 12.0 (11.2; 12.8) | 13.0 (12.1; 13.8) | 13.7 (12.8; 14.6) | 12.7 (12.0; 13.5) | 13.5 (12.6; 14.4) | 13.5 (12.8; 14.2) | 13.8 (13.1; 14.5) | 14.3 (13.6; 15.0) | 15.1 (14.3; 15.8) | 0.48              | <0.001  |  |
| Male                   | 15.1 (14.0; 16.1) | 14.9 (13.8; 16.0)    | 15.0 (14.0; 16.1) | 15.6 (14.6; 16.6) | 17.6 (16.6; 18.7) | 17.0 (15.9; 18.1) | 19.5 (18.4; 20.5) | 17.5 (16.3; 18.7) | 17.8 (16.8; 18.8) | 18.6 (17.6; 19.6) | 19.2 (18.2; 20.1) | 19.7 (18.7; 20.7) | 0.45              | <0.001  |  |
| White                  | 11.2 (10.4; 12.1) | 11.1 (10.3; 12.0)    | 12.2 (11.3; 13.1) | 12.8 (12.0; 13.7) | 14.1 (13.2; 15.0) | 14.4 (13.5; 15.4) | 14.9 (14.1; 15.7) | 14.5 (13.5; 15.5) | 14.7 (13.9; 15.5) | 15.1 (14.3; 15.8) | 14.9 (14.1; 15.7) | 16.1 (15.3; 16.9) | 0.43              | <0.001  |  |
| Non-white              | 12.2 (11.2; 13.2) | 12.0 (11.1; 12.9)    | 13.5 (12.5; 14.5) | 13.9 (13.0; 14.8) | 15.5 (14.5; 16.5) | 15.5 (14.4; 16.5) | 15.6 (14.7; 16.5) | 15.5 (14.5; 16.6) | 15.6 (14.8; 16.4) | 16.3 (15.5; 17.2) | 17.4 (16.6; 18.3) | 17.6 (16.7; 18.4) | 0.48              | <0.001  |  |



1  
2  
3  
4  
5  
6  
7  
8  
9  
10  
11  
12  
13  
14  
15  
16  
17  
18  
19  
20  
21  
22  
23  
24  
25  
26  
27  
28  
29  
30  
31  
32  
33  
34  
35  
36  
37  
38  
39  
40  
41  
42  
43  
44  
45  
46

For peer review only

STROBE Statement—Checklist of items that should be included in reports of *cross-sectional studies*

|                              | Item No | Recommendation                                                                                                                                                                                                                                                                                                                                                                                                                                                      |
|------------------------------|---------|---------------------------------------------------------------------------------------------------------------------------------------------------------------------------------------------------------------------------------------------------------------------------------------------------------------------------------------------------------------------------------------------------------------------------------------------------------------------|
| <b>Title and abstract</b>    | 1       | Indicate the study's design with a commonly used term in the title or the abstract<br><a href="#">Page 2</a><br>(b) Provide in the abstract an informative and balanced summary of what was done and what was found <a href="#">Page 2</a>                                                                                                                                                                                                                          |
| <b>Introduction</b>          |         |                                                                                                                                                                                                                                                                                                                                                                                                                                                                     |
| Background/rationale         | 2       | Explain the scientific background and rationale for the investigation being reported<br><a href="#">Page 3</a>                                                                                                                                                                                                                                                                                                                                                      |
| Objectives                   | 3       | State specific objectives, including any prespecified hypotheses<br><a href="#">Page 3</a>                                                                                                                                                                                                                                                                                                                                                                          |
| <b>Methods</b>               |         |                                                                                                                                                                                                                                                                                                                                                                                                                                                                     |
| Study design                 | 4       | Present key elements of study design early in the paper<br><a href="#">Page 4</a>                                                                                                                                                                                                                                                                                                                                                                                   |
| Setting                      | 5       | Describe the setting, locations, and relevant dates, including periods of recruitment, exposure, follow-up, and data collection<br><a href="#">Page 4</a>                                                                                                                                                                                                                                                                                                           |
| Participants                 | 6       | Give the eligibility criteria, and the sources and methods of selection of participants<br><a href="#">Page 4</a>                                                                                                                                                                                                                                                                                                                                                   |
| Variables                    | 7       | Clearly define all outcomes, exposures, predictors, potential confounders, and effect modifiers. Give diagnostic criteria, if applicable<br><a href="#">Pages 4-5</a>                                                                                                                                                                                                                                                                                               |
| Data sources/<br>measurement | 8*      | For each variable of interest, give sources of data and details of methods of assessment (measurement). Describe comparability of assessment methods if there is more than one group <a href="#">Pages 4-5</a>                                                                                                                                                                                                                                                      |
| Bias                         | 9       | Describe any efforts to address potential sources of bias <a href="#">pages 4-5</a>                                                                                                                                                                                                                                                                                                                                                                                 |
| Study size                   | 10      | Explain how the study size was arrived at <a href="#">page 4</a>                                                                                                                                                                                                                                                                                                                                                                                                    |
| Quantitative variables       | 11      | Explain how quantitative variables were handled in the analyses. If applicable, describe which groupings were chosen and why <a href="#">Page 5</a>                                                                                                                                                                                                                                                                                                                 |
| Statistical methods          | 12      | (a) Describe all statistical methods, including those used to control for confounding<br><a href="#">Page 5</a><br>(b) Describe any methods used to examine subgroups and interactions <a href="#">Page 5</a><br>(c) Explain how missing data were addressed <a href="#">Page 5</a><br>(d) If applicable, describe analytical methods taking account of sampling strategy<br><a href="#">Page 5</a><br>(e) Describe any sensitivity analyses <a href="#">Page 5</a> |
| <b>Results</b>               |         |                                                                                                                                                                                                                                                                                                                                                                                                                                                                     |
| Participants                 | 13*     | (a) Report numbers of individuals at each stage of study—eg numbers potentially eligible, examined for eligibility, confirmed eligible, included in the study, completing follow-up, and analysed <a href="#">Page 4</a><br>(b) Give reasons for non-participation at each stage <a href="#">Page 4</a><br>(c) Consider use of a flow diagram <b>NA</b>                                                                                                             |
| Descriptive data             | 14*     | (a) Give characteristics of study participants (eg demographic, clinical, social) and information on exposures and potential confounders <a href="#">Table 1</a><br>(b) Indicate number of participants with missing data for each variable of interest                                                                                                                                                                                                             |

|                          |     |                                                                                                                                                                                                                                                                                                                                                                                                                                                                                              |
|--------------------------|-----|----------------------------------------------------------------------------------------------------------------------------------------------------------------------------------------------------------------------------------------------------------------------------------------------------------------------------------------------------------------------------------------------------------------------------------------------------------------------------------------------|
|                          |     | <a href="#">page 4</a>                                                                                                                                                                                                                                                                                                                                                                                                                                                                       |
| Outcome data             | 15* | Report numbers of outcome events or summary measures <a href="#">Table 1</a>                                                                                                                                                                                                                                                                                                                                                                                                                 |
| Main results             | 16  | (a) Give unadjusted estimates and, if applicable, confounder-adjusted estimates and their precision (eg, 95% confidence interval). Make clear which confounders were adjusted for and why they were included <a href="#">Figures 1, 2 and 3</a><br>(b) Report category boundaries when continuous variables were categorized <a href="#">NA</a><br>(c) If relevant, consider translating estimates of relative risk into absolute risk for a meaningful time period <a href="#">Figure 1</a> |
| Other analyses           | 17  | Report other analyses done—eg analyses of subgroups and interactions, and sensitivity analyses <a href="#">Figures 2 and 3</a>                                                                                                                                                                                                                                                                                                                                                               |
| <b>Discussion</b>        |     |                                                                                                                                                                                                                                                                                                                                                                                                                                                                                              |
| Key results              | 18  | Summarise key results with reference to study objectives <a href="#">Page 8</a>                                                                                                                                                                                                                                                                                                                                                                                                              |
| Limitations              | 19  | Discuss limitations of the study, taking into account sources of potential bias or imprecision. Discuss both direction and magnitude of any potential bias<br><a href="#">Page 11</a>                                                                                                                                                                                                                                                                                                        |
| Interpretation           | 20  | Give a cautious overall interpretation of results considering objectives, limitations, multiplicity of analyses, results from similar studies, and other relevant evidence<br><a href="#">Page 11</a>                                                                                                                                                                                                                                                                                        |
| Generalisability         | 21  | Discuss the generalisability (external validity) of the study results <a href="#">Page 11</a>                                                                                                                                                                                                                                                                                                                                                                                                |
| <b>Other information</b> |     |                                                                                                                                                                                                                                                                                                                                                                                                                                                                                              |
| Funding                  | 22  | Give the source of funding and the role of the funders for the present study and, if applicable, for the original study on which the present article is based <a href="#">page 6</a>                                                                                                                                                                                                                                                                                                         |

\*Give information separately for exposed and unexposed groups.

**Note:** An Explanation and Elaboration article discusses each checklist item and gives methodological background and published examples of transparent reporting. The STROBE checklist is best used in conjunction with this article (freely available on the Web sites of PLoS Medicine at <http://www.plosmedicine.org/>, Annals of Internal Medicine at <http://www.annals.org/>, and Epidemiology at <http://www.epidem.com/>). Information on the STROBE Initiative is available at [www.strobe-statement.org](http://www.strobe-statement.org).
