# Supplementary material for: Educational disparities in hypertension, diabetes, obesity and smoking in Brazil: a trend analysis of 578 977 adults from a national survey, 2007–2018
Source: PubMed Central journal article supplement — BMJ Open. 2021 Jul 19;11(7):e046154. doi: 10.1136/bmjopen-2020-046154 (PMC8291309; doi:10.1136/bmjopen-2020-046154), 2021-07-19
Supplement: bmjopen-2020-046154supp001.pdf [file bmjopen-2020-046154supp001.pdf]

**Supplementary figure 1:** Age-standardized prevalence of hypertension, diabetes, smoking and obesity by sex, VIGITEL 2007-2018.

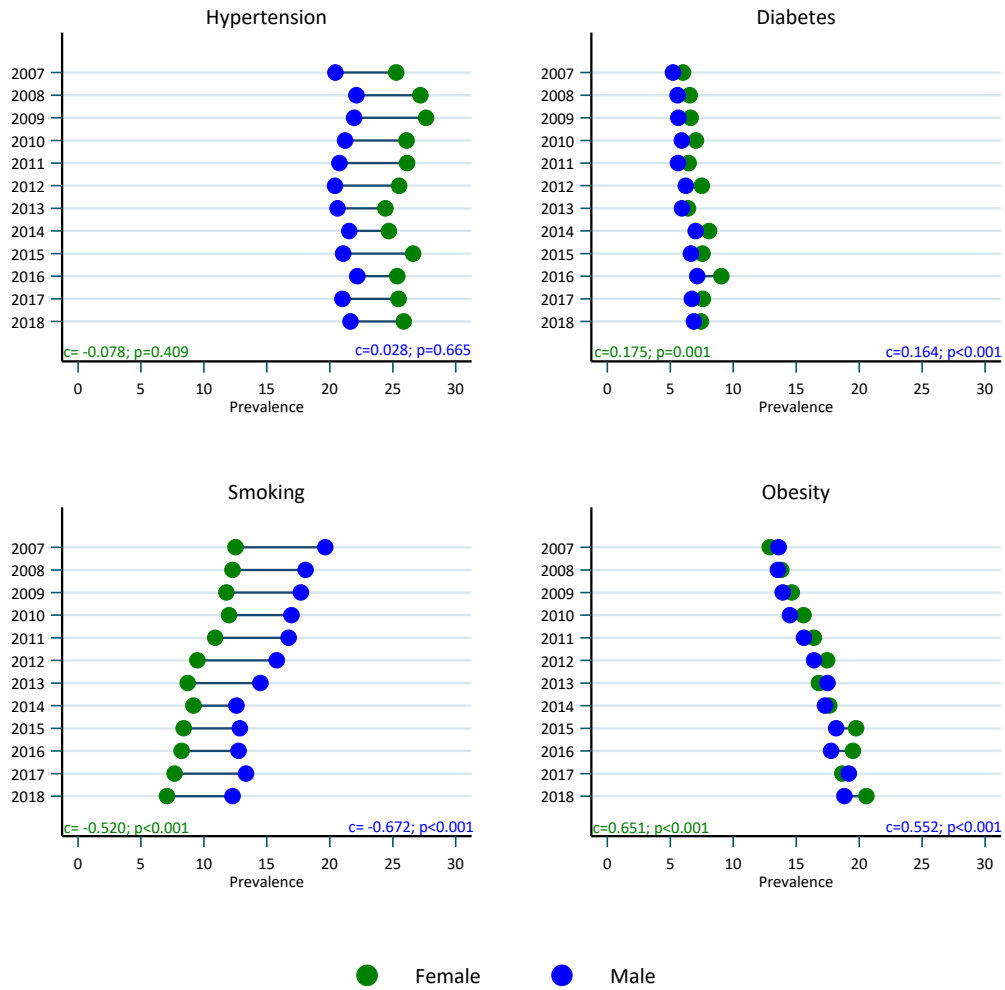

c: annual change (%); p= p-value

**Supplementary figure 2:** Age-standardized prevalence of hypertension, diabetes, smoking and obesity by skin colour, VIGITEL 2007-2018.

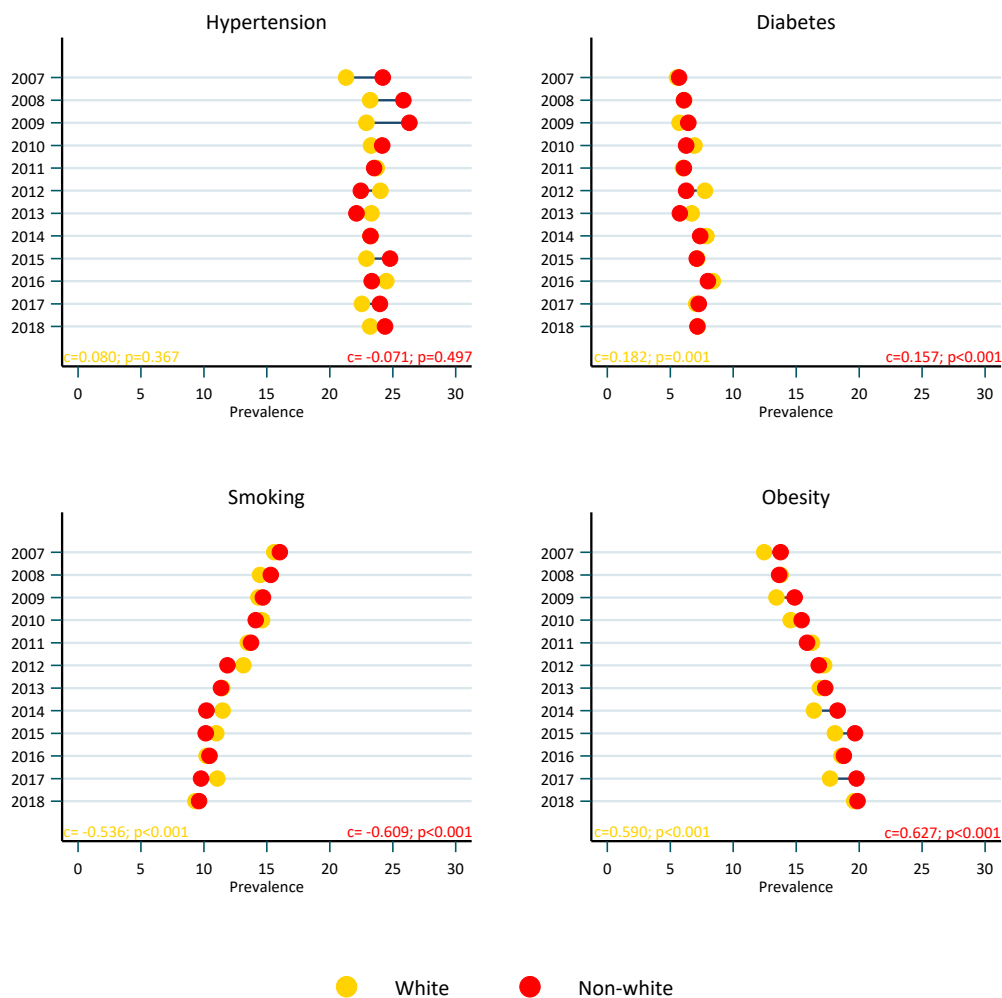

c: annual change (%); p= p-value

**Supplementary Table 1: VIGITEL sociodemographic characteristics and risk factor prevalence by sex, skin colour and survey year.**

| Characteristics by sex and skin colour |           | Survey year and Standard Error |            |            |            |            |            |            |            |            |            |            |            |
|----------------------------------------|-----------|--------------------------------|------------|------------|------------|------------|------------|------------|------------|------------|------------|------------|------------|
|                                        |           | 2007                           | 2008       | 2009       | 2010       | 2011       | 2012       | 2013       | 2014       | 2015       | 2016       | 2017       | 2018       |
| Mean age (years)                       |           |                                |            |            |            |            |            |            |            |            |            |            |            |
|                                        | Female    | 40.6 ± 0.2                     | 40.9 ± 0.2 | 41.2 ± 0.2 | 41.4 ± 0.2 | 41.3 ± 0.2 | 41.2 ± 0.2 | 41.4 ± 0.2 | 41.3 ± 0.2 | 42.3 ± 0.2 | 42.1 ± 0.2 | 42.7 ± 0.2 | 43.0 ± 0.2 |
|                                        | Male      | 38.9 ± 0.2                     | 38.7 ± 0.2 | 39.1 ± 0.2 | 39.1 ± 0.2 | 39.3 ± 0.2 | 38.8 ± 0.2 | 38.8 ± 0.2 | 39.0 ± 0.3 | 39.4 ± 0.2 | 39.2 ± 0.2 | 40.0 ± 0.2 | 40.3 ± 0.2 |
|                                        | White     | 40.4 ± 0.2                     | 40.5 ± 0.2 | 40.8 ± 0.2 | 41.2 ± 0.2 | 41.8 ± 0.2 | 42.1 ± 0.2 | 41.9 ± 0.2 | 42.1 ± 0.2 | 42.1 ± 0.2 | 42.3 ± 0.2 | 42.8 ± 0.2 | 42.8 ± 0.2 |
|                                        | Non-white | 39.3 ± 0.2                     | 39.6 ± 0.2 | 39.9 ± 0.2 | 39.8 ± 0.2 | 39.3 ± 0.2 | 38.6 ± 0.2 | 38.8 ± 0.2 | 38.8 ± 0.2 | 40.1 ± 0.2 | 39.4 ± 0.2 | 40.4 ± 0.2 | 40.9 ± 0.2 |
| Education (years)                      |           |                                |            |            |            |            |            |            |            |            |            |            |            |
|                                        | Female    | 9.4 ± 0.1                      | 9.4 ± 0.1  | 9.7 ± 0.1  | 9.9 ± 0.1  | 9.9 ± 0.1  | 10.4 ± 0.1 | 10.5 ± 0.1 | 10.7 ± 0.1 | 10.6 ± 0.1 | 10.9 ± 0.1 | 10.8 ± 0.1 | 10.9 ± 0.1 |
|                                        | Male      | 9.3 ± 0.1                      | 9.4 ± 0.1  | 9.6 ± 0.1  | 9.7 ± 0.1  | 9.8 ± 0.1  | 10.2 ± 0.1 | 10.3 ± 0.1 | 10.5 ± 0.1 | 10.3 ± 0.1 | 10.7 ± 0.1 | 10.5 ± 0.1 | 10.5 ± 0.1 |
|                                        | White     | 10.6 ± 0.1                     | 10.6 ± 0.1 | 10.8 ± 0.1 | 11.0 ± 0.1 | 10.8 ± 0.1 | 11.1 ± 0.1 | 11.1 ± 0.1 | 11.3 ± 0.1 | 11.5 ± 0.1 | 11.4 ± 0.1 | 11.4 ± 0.1 | 11.7 ± 0.1 |
|                                        | Non-white | 8.5 ± 0.0                      | 8.7 ± 0.0  | 8.9 ± 0.1  | 9.0 ± 0.1  | 9.1 ± 0.1  | 9.7 ± 0.1  | 9.9 ± 0.1  | 10.1 ± 0.1 | 9.7 ± 0.1  | 10.3 ± 0.1 | 10.1 ± 0.1 | 10.0 ± 0.1 |
| Hypertension <sup>+</sup>              |           |                                |            |            |            |            |            |            |            |            |            |            |            |
|                                        | Female    | 25.3 ± 0.5                     | 27.2 ± 0.5 | 27.7 ± 0.5 | 26.1 ± 0.5 | 26.1 ± 0.5 | 25.5 ± 0.5 | 24.4 ± 0.5 | 24.7 ± 0.6 | 26.6 ± 0.5 | 25.4 ± 0.5 | 25.5 ± 0.5 | 25.9 ± 0.5 |
|                                        | Male      | 20.5 ± 0.6                     | 22.1 ± 0.6 | 21.9 ± 0.6 | 21.2 ± 0.6 | 20.8 ± 0.5 | 20.4 ± 0.6 | 20.6 ± 0.6 | 21.6 ± 0.7 | 21.1 ± 0.6 | 22.2 ± 0.6 | 21 ± 0.6   | 21.6 ± 0.6 |
|                                        | White     | 21.3 ± 0.6                     | 23.2 ± 0.6 | 22.9 ± 0.6 | 23.3 ± 0.6 | 23.7 ± 0.6 | 24 ± 0.6   | 23.3 ± 0.6 | 23.2 ± 0.6 | 22.9 ± 0.6 | 24.5 ± 0.6 | 22.6 ± 0.6 | 23.2 ± 0.6 |
|                                        | Non-white | 24.2 ± 0.5                     | 25.8 ± 0.5 | 26.3 ± 0.5 | 24.2 ± 0.5 | 23.5 ± 0.5 | 22.5 ± 0.5 | 22.1 ± 0.5 | 23.2 ± 0.6 | 24.8 ± 0.6 | 23.3 ± 0.5 | 24 ± 0.5   | 24.4 ± 0.5 |
| Diabetes <sup>+</sup>                  |           |                                |            |            |            |            |            |            |            |            |            |            |            |
|                                        | Female    | 6 ± 0.3                        | 6.5 ± 0.3  | 6.6 ± 0.3  | 7 ± 0.3    | 6.4 ± 0.3  | 7.5 ± 0.3  | 6.4 ± 0.3  | 8.1 ± 0.4  | 7.6 ± 0.3  | 9.1 ± 0.4  | 7.6 ± 0.3  | 7.4 ± 0.3  |
|                                        | Male      | 5.2 ± 0.3                      | 5.6 ± 0.3  | 5.6 ± 0.3  | 5.9 ± 0.3  | 5.6 ± 0.3  | 6.2 ± 0.4  | 5.9 ± 0.4  | 7 ± 0.4    | 6.6 ± 0.4  | 7.1 ± 0.4  | 6.7 ± 0.3  | 6.9 ± 0.3  |
|                                        | White     | 5.5 ± 0.3                      | 6.1 ± 0.3  | 5.7 ± 0.4  | 6.9 ± 0.4  | 6 ± 0.3    | 7.7 ± 0.4  | 6.7 ± 0.3  | 7.9 ± 0.4  | 7.2 ± 0.4  | 8.4 ± 0.4  | 7.1 ± 0.3  | 7.2 ± 0.3  |
|                                        | Non-white | 5.7 ± 0.3                      | 6.1 ± 0.3  | 6.4 ± 0.3  | 6.3 ± 0.3  | 6.1 ± 0.3  | 6.3 ± 0.3  | 5.8 ± 0.3  | 7.4 ± 0.4  | 7.1 ± 0.3  | 8 ± 0.3    | 7.3 ± 0.3  | 7.2 ± 0.3  |
| Smoking <sup>+</sup>                   |           |                                |            |            |            |            |            |            |            |            |            |            |            |
|                                        | Female    | 12.5 ± 0.4                     | 12.3 ± 0.4 | 11.8 ± 0.4 | 12 ± 0.4   | 10.9 ± 0.4 | 9.5 ± 0.4  | 8.7 ± 0.4  | 9.2 ± 0.5  | 8.4 ± 0.4  | 8.2 ± 0.4  | 7.7 ± 0.4  | 7.1 ± 0.3  |
|                                        | Male      | 19.6 ± 0.6                     | 18.1 ± 0.6 | 17.7 ± 0.6 | 17 ± 0.6   | 16.7 ± 0.6 | 15.8 ± 0.7 | 14.5 ± 0.6 | 12.6 ± 0.6 | 12.9 ± 0.6 | 12.8 ± 0.6 | 13.3 ± 0.6 | 12.3 ± 0.6 |
|                                        | White     | 15.6 ± 0.5                     | 14.5 ± 0.5 | 14.3 ± 0.5 | 14.6 ± 0.6 | 13.5 ± 0.5 | 13.1 ± 0.6 | 11.5 ± 0.5 | 11.5 ± 0.6 | 11 ± 0.5   | 10.2 ± 0.5 | 11.1 ± 0.6 | 9.3 ± 0.5  |
|                                        | Non-white | 16 ± 0.5                       | 15.3 ± 0.5 | 14.7 ± 0.5 | 14.1 ± 0.5 | 13.7 ± 0.4 | 11.9 ± 0.5 | 11.4 ± 0.5 | 10.2 ± 0.5 | 10.1 ± 0.5 | 10.4 ± 0.5 | 9.8 ± 0.4  | 9.6 ± 0.5  |
| Obesity <sup>+</sup>                   |           |                                |            |            |            |            |            |            |            |            |            |            |            |
|                                        | Female    | 12.9 ± 0.4                     | 13.8 ± 0.4 | 14.6 ± 0.4 | 15.6 ± 0.4 | 16.4 ± 0.4 | 17.5 ± 0.5 | 16.8 ± 0.4 | 17.6 ± 0.5 | 19.8 ± 0.5 | 19.5 ± 0.5 | 18.7 ± 0.5 | 20.6 ± 0.5 |
|                                        | Male      | 13.6 ± 0.5                     | 13.6 ± 0.5 | 13.9 ± 0.5 | 14.5 ± 0.5 | 15.6 ± 0.5 | 16.4 ± 0.6 | 17.5 ± 0.6 | 17.3 ± 0.6 | 18.2 ± 0.6 | 17.8 ± 0.6 | 19.2 ± 0.6 | 18.8 ± 0.6 |
|                                        | White     | 12.5 ± 0.5                     | 13.8 ± 0.5 | 13.4 ± 0.5 | 14.6 ± 0.5 | 16.3 ± 0.5 | 17.2 ± 0.6 | 16.9 ± 0.5 | 16.4 ± 0.6 | 18.1 ± 0.6 | 18.6 ± 0.6 | 17.7 ± 0.6 | 19.6 ± 0.6 |
|                                        | Non-white | 13.8 ± 0.4                     | 13.6 ± 0.4 | 14.9 ± 0.4 | 15.4 ± 0.4 | 15.9 ± 0.4 | 16.8 ± 0.5 | 17.3 ± 0.5 | 18.3 ± 0.6 | 19.7 ± 0.5 | 18.8 ± 0.5 | 19.8 ± 0.5 | 19.9 ± 0.5 |

<sup>+</sup> Age standardized according to 2018 age distribution.

**Supplementary table 2: Age-standardized prevalence of hypertension by years of education, sex and skin colour, VIGITEL 2007-2018.**

| Years of education      | Survey year (95% CI) |                   |                   |                   |                   |                   |                   |                   |                   |                   |                   |                   | Annual change (%) | p value |
|-------------------------|----------------------|-------------------|-------------------|-------------------|-------------------|-------------------|-------------------|-------------------|-------------------|-------------------|-------------------|-------------------|-------------------|---------|
| Sex and skin colour (%) | 2007                 | 2008              | 2009              | 2010              | 2011              | 2012              | 2013              | 2014              | 2015              | 2016              | 2017              | 2018              |                   |         |
| <b>0-3 years</b>        |                      |                   |                   |                   |                   |                   |                   |                   |                   |                   |                   |                   |                   |         |
| Total                   | 55.2 (53.3; 57.2)    | 58.4 (56.5; 60.3) | 60.8 (58.8; 62.8) | 59.0 (57.0; 61.0) | 57.0 (55.1; 58.9) | 56.0 (53.5; 58.4) | 56.6 (54.3; 58.9) | 59.8 (57.3; 62.4) | 57.9 (55.9; 59.9) | 61.9 (59.7; 64.1) | 59.2 (57.2; 61.2) | 60.7 (58.8; 62.6) | 0.29              | 0.112   |
| Female                  | 58.9 (56.5; 61.2)    | 62.4 (60.1; 64.7) | 64.6 (62.2; 67.0) | 63.0 (60.6; 65.4) | 62.1 (59.9; 64.4) | 60.0 (57.1; 62.9) | 62.2 (59.5; 64.9) | 62.5 (59.5; 65.6) | 62.5 (60.1; 64.9) | 66.7 (64.1; 69.3) | 62.6 (60.3; 65.0) | 63.6 (61.4; 65.9) | 0.25              | 0.179   |
| Male                    | 46.2 (42.8; 49.5)    | 48.3 (45.0; 51.7) | 50.7 (47.1; 54.3) | 48.8 (45.2; 52.4) | 43.3 (40.0; 46.7) | 45.1 (40.8; 49.4) | 43.3 (39.3; 47.2) | 52.6 (48.2; 57.1) | 45.3 (41.8; 48.9) | 50.4 (46.5; 54.2) | 50.5 (47.0; 54.0) | 52.9 (49.5; 56.4) | 0.35              | 0.112   |
| White                   | 54.6 (50.9; 58.2)    | 57.6 (54.0; 61.3) | 59.0 (55.1; 63.0) | 61.5 (57.7; 65.2) | 58.9 (55.7; 62.0) | 55.8 (51.9; 59.6) | 56.9 (53.4; 60.4) | 56.6 (52.7; 60.5) | 57.2 (53.7; 60.7) | 61.5 (58.2; 64.8) | 58.6 (55.3; 62.0) | 61.6 (58.3; 64.8) | 0.34              | 0.156   |
| Non-white               | 55.5 (53.2; 57.9)    | 58.8 (56.5; 61.0) | 61.5 (59.2; 63.8) | 57.9 (55.5; 60.3) | 55.9 (53.6; 58.3) | 56.1 (53.0; 59.2) | 56.3 (53.3; 59.3) | 62.5 (59.1; 65.8) | 58.2 (55.8; 60.7) | 62.3 (59.4; 65.2) | 59.5 (57.1; 62.0) | 60.2 (57.9; 62.5) | 0.30              | 0.083   |
| <b>4-8 years</b>        |                      |                   |                   |                   |                   |                   |                   |                   |                   |                   |                   |                   |                   |         |
| Total                   | 44.0 (42.8; 45.2)    | 45.4 (44.2; 46.6) | 46.7 (45.5; 47.9) | 46.9 (45.7; 48.0) | 46.1 (44.9; 47.2) | 47.1 (45.8; 48.4) | 48.8 (47.6; 50.0) | 47.1 (45.8; 48.4) | 47.8 (46.7; 48.9) | 49.6 (48.4; 50.9) | 49.5 (48.4; 50.7) | 49.5 (48.4; 50.6) | 0.45              | <0.001  |
| Female                  | 48.3 (46.8; 49.9)    | 50.6 (49.1; 52.2) | 50.4 (48.9; 51.9) | 50.9 (49.4; 52.4) | 51.0 (49.6; 52.5) | 52.1 (50.4; 53.8) | 53.4 (51.9; 54.9) | 51.3 (49.6; 53.0) | 52.7 (51.3; 54.1) | 54.1 (52.6; 55.7) | 53.6 (52.2; 55.0) | 53.5 (52.1; 54.9) | 0.42              | <0.001  |
| Male                    | 35.3 (33.4; 37.1)    | 34.6 (32.7; 36.4) | 38.8 (36.9; 40.7) | 38.2 (36.4; 40.1) | 36.2 (34.5; 37.9) | 36.7 (34.6; 38.7) | 38.5 (36.6; 40.4) | 37.9 (35.7; 40.0) | 37.7 (36.0; 39.4) | 40.5 (38.5; 42.4) | 40.9 (39.0; 42.8) | 40.6 (38.8; 42.5) | 0.46              | 0.001   |
| White                   | 45.7 (43.6; 47.8)    | 48.2 (46.1; 50.3) | 47.2 (45.0; 49.3) | 48.5 (46.4; 50.6) | 47.8 (45.9; 49.7) | 48.9 (46.9; 51.0) | 51.8 (49.9; 53.6) | 48.0 (45.9; 50.0) | 48.9 (47.0; 50.7) | 50.7 (48.9; 52.5) | 51.4 (49.6; 53.2) | 50.1 (48.3; 51.9) | 0.37              | <0.001  |
| Non-white               | 43.0 (41.5; 44.4)    | 43.9 (42.4; 45.3) | 46.4 (44.9; 47.9) | 45.9 (44.5; 47.4) | 44.8 (43.3; 46.3) | 45.6 (43.8; 47.3) | 46.1 (44.5; 47.7) | 46.4 (44.6; 48.2) | 47.2 (45.8; 48.6) | 48.7 (47.1; 50.4) | 48.3 (46.8; 49.7) | 49.1 (47.7; 50.6) | 0.48              | <0.001  |
| <b>9-11 years</b>       |                      |                   |                   |                   |                   |                   |                   |                   |                   |                   |                   |                   |                   |         |
| Total                   | 27.2 (26.3; 28.1)    | 29.2 (28.3; 30.1) | 29.6 (28.7; 30.5) | 30.7 (29.9; 31.6) | 29.2 (28.3; 30.0) | 29.3 (28.4; 30.2) | 28.8 (28.0; 29.6) | 29.4 (28.5; 30.3) | 30.0 (29.3; 30.8) | 30.6 (29.8; 31.4) | 29.8 (29.0; 30.6) | 30.3 (29.5; 31.1) | 0.17              | 0.112   |
| Female                  | 29.0 (27.8; 30.2)    | 31.4 (30.2; 32.6) | 31.6 (30.4; 32.7) | 32.7 (31.6; 33.9) | 31.0 (29.9; 32.1) | 31.5 (30.3; 32.6) | 31.0 (29.9; 32.1) | 31.3 (30.1; 32.5) | 32.9 (31.9; 33.9) | 32.6 (31.5; 33.7) | 32.0 (31.0; 33.1) | 33.1 (32.0; 34.1) | 0.22              | 0.043   |
| Male                    | 24.1 (22.8; 25.4)    | 25.5 (24.2; 26.7) | 26.2 (24.9; 27.5) | 27.1 (25.8; 28.4) | 26.1 (24.9; 27.3) | 25.5 (24.2; 26.8) | 25.2 (24.1; 26.4) | 26.2 (24.9; 27.6) | 25.2 (24.1; 26.3) | 27.2 (26.1; 28.4) | 26.0 (24.9; 27.2) | 25.5 (24.3; 26.6) | 0.07              | 0.496   |
| White                   | 27.9 (26.4; 29.4)    | 31.4 (29.9; 32.9) | 31.3 (29.8; 32.7) | 33.1 (31.6; 34.6) | 32.4 (31.0; 33.8) | 33.3 (31.8; 34.7) | 31.1 (29.8; 32.4) | 31.8 (30.4; 33.3) | 31.4 (30.2; 32.7) | 33.4 (32.2; 34.7) | 32.0 (30.7; 33.3) | 31.9 (30.6; 33.1) | 0.21              | 0.276   |
| Non-white               | 26.7 (25.6; 27.8)    | 27.8 (26.7; 28.9) | 28.5 (27.5; 29.6) | 29.3 (28.2; 30.3) | 26.8 (25.8; 27.8) | 26.3 (25.2; 27.4) | 27.1 (26.0; 28.1) | 27.7 (26.5; 28.8) | 29.2 (28.2; 30.1) | 28.6 (27.6; 29.6) | 28.5 (27.5; 29.4) | 29.3 (28.3; 30.2) | 0.16              | 0.040   |
| <b>12 or more years</b> |                      |                   |                   |                   |                   |                   |                   |                   |                   |                   |                   |                   |                   |         |
| Total                   | 23.7 (22.7; 24.6)    | 25.0 (24.0; 25.9) | 25.0 (24.1; 25.9) | 25.6 (24.7; 26.5) | 25.3 (24.4; 26.2) | 24.4 (23.5; 25.3) | 23.8 (23.0; 24.6) | 25.1 (24.2; 26.0) | 25.2 (24.5; 25.9) | 25.3 (24.6; 26.0) | 24.6 (23.9; 25.3) | 23.8 (23.1; 24.4) | -0.01             | 0.954   |
| Female                  | 22.4 (21.1; 23.6)    | 23.9 (22.7; 25.1) | 24.3 (23.2; 25.5) | 25.4 (24.3; 26.5) | 24.3 (23.2; 25.5) | 23.9 (22.7; 25.0) | 23.0 (22.0; 24.0) | 25.0 (23.8; 26.2) | 25.2 (24.2; 26.1) | 24.7 (23.8; 25.6) | 24.0 (23.2; 24.9) | 23.6 (22.8; 24.5) | 0.08              | 0.504   |
| Male                    | 25.7 (24.3; 27.1)    | 26.6 (25.2; 28.0) | 26.0 (24.6; 27.4) | 26.0 (24.6; 27.3) | 26.9 (25.6; 28.2) | 25.4 (24.0; 26.8) | 25.2 (24.0; 26.4) | 25.3 (23.8; 26.7) | 25.2 (24.1; 26.4) | 26.3 (25.2; 27.4) | 25.6 (24.5; 26.6) | 24.0 (23.0; 25.1) | -0.12             | 0.092   |
| White                   | 24.7 (23.4; 26.0)    | 25.2 (23.9; 26.4) | 24.7 (23.5; 26.0) | 26.7 (25.5; 27.9) | 26.4 (25.2; 27.6) | 25.4 (24.1; 26.6) | 25.9 (24.8; 27.0) | 26.7 (25.4; 27.9) | 26.8 (25.8; 27.9) | 27.1 (26.1; 28.0) | 26.0 (25.1; 27.0) | 25.0 (24.0; 25.9) | 0.08              | 0.424   |
| Non-white               | 22.3 (21.0; 23.6)    | 24.7 (23.4; 26.0) | 25.3 (24.0; 26.6) | 24.2 (23.0; 25.5) | 23.8 (22.5; 25.0) | 23.2 (21.9; 24.5) | 21.1 (20.0; 22.1) | 23.3 (22.0; 24.6) | 23.2 (22.2; 24.2) | 23.2 (22.2; 24.2) | 23.0 (22.0; 23.9) | 22.5 (21.5; 23.4) | -0.11             | 0.357   |

**Supplementary table 3: Age-standardized prevalence of diabetes by years of education, sex and skin colour, VIGITEL 2007-2018.**

| Years of education      | Survey year (95% CI) |                   |                   |                   |                   |                   |                   |                   |                   |                   |                   |                   | Annual change (%) | p value |
|-------------------------|----------------------|-------------------|-------------------|-------------------|-------------------|-------------------|-------------------|-------------------|-------------------|-------------------|-------------------|-------------------|-------------------|---------|
| Sex and skin colour (%) | 2007                 | 2008              | 2009              | 2010              | 2011              | 2012              | 2013              | 2014              | 2015              | 2016              | 2017              | 2018              |                   |         |
| <b>0-3 years</b>        |                      |                   |                   |                   |                   |                   |                   |                   |                   |                   |                   |                   |                   |         |
| Total                   | 17.2 (15.6; 18.7)    | 18.8 (17.2; 20.4) | 20.3 (18.5; 22.0) | 19.9 (18.2; 21.6) | 20.0 (18.4; 21.6) | 20.0 (18.0; 22.0) | 19.7 (17.8; 21.5) | 23.6 (21.4; 25.9) | 22.1 (20.3; 23.8) | 25.9 (23.9; 28.0) | 22.4 (20.8; 24.1) | 24.4 (22.7; 26.0) | 0.60              | <0.001  |
| Female                  | 18.2 (16.3; 20.1)    | 20.1 (18.1; 22.1) | 21.4 (19.2; 23.6) | 20.8 (18.6; 22.9) | 21.7 (19.8; 23.7) | 21.8 (19.3; 24.3) | 21.7 (19.3; 24.1) | 25.6 (22.7; 28.4) | 23.7 (21.6; 25.9) | 28.1 (25.6; 30.6) | 24.0 (22.0; 26.1) | 25.8 (23.8; 27.9) | 0.67              | <0.001  |
| Male                    | 14.6 (12.3; 16.9)    | 15.6 (13.1; 18.0) | 17.2 (14.3; 20.1) | 17.7 (14.9; 20.4) | 15.3 (12.8; 17.7) | 15.2 (12.0; 18.4) | 14.8 (12.0; 17.5) | 18.6 (15.1; 22.0) | 17.5 (14.8; 20.2) | 20.7 (17.6; 23.8) | 18.5 (15.8; 21.2) | 20.6 (17.9; 23.4) | 0.45              | 0.001   |
| White                   | 15.7 (13.1; 18.4)    | 18.3 (15.4; 21.1) | 20.2 (16.8; 23.6) | 20.3 (16.9; 23.6) | 18.1 (15.6; 20.5) | 18.0 (15.1; 20.9) | 19.4 (16.5; 22.2) | 23.2 (19.8; 26.6) | 22.5 (19.5; 25.5) | 25.2 (22.2; 28.1) | 21.7 (18.9; 24.5) | 21.5 (18.8; 24.2) | 0.55              | 0.014   |
| Non-white               | 17.8 (16.0; 19.7)    | 19.1 (17.2; 21.0) | 20.3 (18.2; 22.3) | 19.7 (17.7; 21.7) | 21.1 (19.1; 23.1) | 21.5 (18.8; 24.3) | 19.9 (17.4; 22.4) | 24.0 (20.9; 27.0) | 21.8 (19.7; 23.9) | 26.6 (23.9; 29.4) | 22.9 (20.8; 24.9) | 25.9 (23.8; 28.0) | 0.62              | <0.001  |
| <b>4-8 years</b>        |                      |                   |                   |                   |                   |                   |                   |                   |                   |                   |                   |                   |                   |         |
| Total                   | 11.5 (10.7; 12.4)    | 12.0 (11.2; 12.9) | 13.5 (12.6; 14.4) | 14.0 (13.1; 14.9) | 14.4 (13.5; 15.3) | 14.6 (13.7; 15.6) | 15.4 (14.5; 16.3) | 16.8 (15.8; 17.9) | 15.8 (15.0; 16.6) | 19.0 (18.0; 20.0) | 17.2 (16.3; 18.0) | 17.7 (16.8; 18.5) | 0.60              | <0.001  |
| Female                  | 12.4 (11.3; 13.5)    | 13.1 (12.0; 14.2) | 13.8 (12.7; 15.0) | 14.7 (13.6; 15.8) | 15.8 (14.7; 17.0) | 15.0 (13.8; 16.3) | 16.0 (14.8; 17.2) | 17.3 (16.0; 18.6) | 16.6 (15.6; 17.7) | 20.2 (18.9; 21.4) | 17.7 (16.6; 18.8) | 18.0 (17.0; 19.1) | 0.58              | <0.001  |
| Male                    | 9.8 (8.7; 11.0)      | 9.8 (8.6; 11.0)   | 12.7 (11.3; 14.1) | 12.5 (11.2; 13.9) | 11.7 (10.5; 12.9) | 13.8 (12.3; 15.3) | 14.1 (12.7; 15.6) | 15.7 (14.1; 17.4) | 14.0 (12.8; 15.2) | 16.7 (15.2; 18.1) | 16.1 (14.7; 17.5) | 16.8 (15.4; 18.2) | 0.63              | <0.001  |
| White                   | 12.3 (10.8; 13.7)    | 12.7 (11.2; 14.2) | 13.9 (12.3; 15.4) | 15.5 (13.9; 17.1) | 15.3 (13.9; 16.8) | 14.1 (12.7; 15.6) | 16.5 (15.0; 17.9) | 17.0 (15.4; 18.5) | 15.8 (14.5; 17.2) | 20.6 (19.1; 22.0) | 17.6 (16.3; 19.0) | 18.3 (16.9; 19.7) | 0.58              | <0.001  |
| Non-white               | 11.1 (10.1; 12.1)    | 11.6 (10.6; 12.6) | 13.3 (12.2; 14.4) | 13.1 (12.1; 14.2) | 13.8 (12.7; 14.9) | 15.0 (13.7; 16.3) | 14.5 (13.3; 15.7) | 16.7 (15.4; 18.1) | 15.7 (14.7; 16.8) | 17.6 (16.4; 18.9) | 16.9 (15.8; 18.0) | 17.3 (16.2; 18.4) | 0.59              | <0.001  |
| <b>9-11 years</b>       |                      |                   |                   |                   |                   |                   |                   |                   |                   |                   |                   |                   |                   |         |
| Total                   | 6.5 (6.0; 7.1)       | 7.1 (6.6; 7.7)    | 7.6 (7.1; 8.2)    | 8.4 (7.9; 9.0)    | 7.8 (7.3; 8.3)    | 8.4 (7.8; 9.0)    | 7.7 (7.2; 8.2)    | 8.9 (8.3; 9.5)    | 8.8 (8.3; 9.3)    | 10.4 (9.8; 10.9)  | 8.9 (8.4; 9.3)    | 8.9 (8.5; 9.4)    | 0.23              | 0.001   |
| Female                  | 6.7 (6.0; 7.4)       | 7.3 (6.5; 8.0)    | 7.8 (7.0; 8.5)    | 8.9 (8.1; 9.6)    | 7.9 (7.2; 8.6)    | 8.6 (7.9; 9.4)    | 7.9 (7.3; 8.6)    | 9.1 (8.3; 9.9)    | 9.4 (8.7; 10.0)   | 11.0 (10.3; 11.7) | 8.9 (8.3; 9.5)    | 9.1 (8.5; 9.7)    | 0.24              | 0.003   |
| Male                    | 6.3 (5.5; 7.0)       | 6.8 (6.0; 7.7)    | 7.4 (6.6; 8.2)    | 7.6 (6.8; 8.4)    | 7.6 (6.8; 8.3)    | 8.0 (7.1; 8.8)    | 7.3 (6.6; 8.1)    | 8.6 (7.7; 9.5)    | 7.7 (7.1; 8.4)    | 9.4 (8.6; 10.1)   | 8.8 (8.1; 9.5)    | 8.6 (7.9; 9.4)    | 0.21              | <0.001  |
| White                   | 6.9 (6.0; 7.8)       | 8.3 (7.3; 9.4)    | 8.0 (7.1; 9.0)    | 9.8 (8.8; 10.8)   | 9.1 (8.2; 10.0)   | 9.3 (8.4; 10.2)   | 8.6 (7.8; 9.5)    | 9.7 (8.8; 10.7)   | 9.5 (8.7; 10.3)   | 11.5 (10.6; 12.4) | 9.8 (9.0; 10.6)   | 9.5 (8.7; 10.3)   | 0.23              | 0.009   |
| Non-white               | 6.3 (5.6; 7.0)       | 6.4 (5.7; 7.0)    | 7.4 (6.7; 8.0)    | 7.6 (6.9; 8.2)    | 6.8 (6.2; 7.5)    | 7.7 (7.0; 8.4)    | 7.0 (6.4; 7.6)    | 8.3 (7.5; 9.0)    | 8.3 (7.7; 8.9)    | 9.6 (8.9; 10.3)   | 8.3 (7.7; 8.8)    | 8.6 (8.0; 9.2)    | 0.23              | <0.001  |
| <b>12 or more years</b> |                      |                   |                   |                   |                   |                   |                   |                   |                   |                   |                   |                   |                   |         |
| Total                   | 5.6 (5.1; 6.2)       | 5.7 (5.1; 6.2)    | 6.6 (6.0; 7.1)    | 6.8 (6.3; 7.4)    | 6.3 (5.7; 6.8)    | 6.2 (5.7; 6.8)    | 5.8 (5.4; 6.2)    | 6.7 (6.2; 7.3)    | 6.4 (6.0; 6.8)    | 8.4 (8.0; 8.9)    | 6.6 (6.2; 7.0)    | 6.4 (6.0; 6.7)    | 0.10              | 0.094   |
| Female                  | 4.7 (4.0; 5.3)       | 4.7 (4.1; 5.3)    | 5.9 (5.1; 6.6)    | 6.5 (5.8; 7.2)    | 5.6 (5.0; 6.2)    | 6.0 (5.3; 6.7)    | 5.4 (4.8; 5.9)    | 6.7 (6.0; 7.5)    | 6.1 (5.6; 6.7)    | 7.9 (7.4; 8.5)    | 6.1 (5.6; 6.6)    | 6.1 (5.6; 6.5)    | 0.15              | 0.028   |
| Male                    | 7.1 (6.2; 8.1)       | 7.2 (6.3; 8.1)    | 7.7 (6.8; 8.6)    | 7.4 (6.6; 8.3)    | 7.4 (6.5; 8.2)    | 6.6 (5.8; 7.5)    | 6.6 (5.9; 7.3)    | 6.7 (5.9; 7.6)    | 6.9 (6.2; 7.5)    | 9.3 (8.5; 10.0)   | 7.6 (6.9; 8.2)    | 6.9 (6.2; 7.5)    | 0.02              | 0.748   |
| White                   | 5.7 (4.9; 6.4)       | 5.6 (4.9; 6.3)    | 6.7 (5.9; 7.5)    | 7.1 (6.4; 7.8)    | 6.7 (6.0; 7.5)    | 6.3 (5.6; 7.0)    | 6.4 (5.8; 7.1)    | 7.3 (6.5; 8.1)    | 7.0 (6.4; 7.6)    | 9.3 (8.6; 9.9)    | 7.2 (6.7; 7.8)    | 6.8 (6.2; 7.3)    | 0.16              | 0.041   |
| Non-white               | 5.6 (4.8; 6.4)       | 5.7 (5.0; 6.5)    | 6.4 (5.6; 7.2)    | 6.5 (5.8; 7.3)    | 5.6 (4.9; 6.3)    | 6.2 (5.4; 6.9)    | 5.0 (4.4; 5.6)    | 6.1 (5.3; 6.8)    | 5.8 (5.2; 6.3)    | 7.4 (6.8; 8.0)    | 6.0 (5.4; 6.5)    | 5.9 (5.3; 6.4)    | 0.03              | 0.447   |

**Supplementary table 4:** Age-standardized prevalence of smoking by years of education, sex and skin colour, VIGITEL 2007-2018.

| Years of education      |                   | Survey year (95% CI) |                   |                   |                   |                   |                   |                   |                   |                   |                   |                   | Annual change (%) | p value |  |
|-------------------------|-------------------|----------------------|-------------------|-------------------|-------------------|-------------------|-------------------|-------------------|-------------------|-------------------|-------------------|-------------------|-------------------|---------|--|
| Sex and skin colour (%) | 2007              | 2008                 | 2009              | 2010              | 2011              | 2012              | 2013              | 2014              | 2015              | 2016              | 2017              | 2018              |                   |         |  |
| 0-3 years               |                   |                      |                   |                   |                   |                   |                   |                   |                   |                   |                   |                   |                   |         |  |
| Total                   | 13.0 (11.7; 14.2) | 12.9 (11.6; 14.1)    | 12.6 (11.3; 13.9) | 11.6 (10.4; 12.9) | 12.4 (11.2; 13.6) | 11.0 (9.5; 12.4)  | 11.8 (10.3; 13.3) | 11.7 (10.1; 13.4) | 9.9 (8.7; 11.1)   | 11.8 (10.2; 13.3) | 9.8 (8.6; 11.0)   | 9.0 (7.9; 10.2)   | -0.29             | <0.001  |  |
| Female                  | 10.7 (9.3; 12.1)  | 11.1 (9.7; 12.6)     | 10.9 (9.4; 12.4)  | 10.9 (9.3; 12.4)  | 10.1 (8.8; 11.5)  | 9.5 (7.9; 11.2)   | 9.7 (8.1; 11.4)   | 10.4 (8.4; 12.3)  | 8.3 (7.0; 9.7)    | 10.3 (8.5; 12.1)  | 8.5 (7.0; 9.9)    | 9.0 (7.6; 10.4)   | -0.22             | <0.001  |  |
| Male                    | 18.6 (16.0; 21.2) | 17.4 (15.0; 19.8)    | 17.1 (14.5; 19.6) | 13.6 (11.3; 15.9) | 18.5 (15.9; 21.0) | 14.8 (11.8; 17.8) | 16.7 (13.8; 19.7) | 15.3 (12.1; 18.5) | 14.3 (11.8; 16.8) | 15.3 (12.4; 18.2) | 13.3 (10.9; 15.6) | 9.1 (7.1; 11.1)   | -0.54             | 0.005   |  |
| White                   | 10.4 (8.2; 12.5)  | 9.9 (7.8; 11.9)      | 10.9 (8.5; 13.3)  | 9.7 (7.5; 11.9)   | 11.4 (9.4; 13.3)  | 11.4 (9.0; 13.9)  | 10.2 (8.2; 12.3)  | 10.7 (8.2; 13.1)  | 8.2 (6.3; 10.0)   | 9.4 (7.4; 11.4)   | 8.2 (6.3; 10.0)   | 8.1 (6.2; 10.0)   | -0.21             | 0.013   |  |
| Non-white               | 14.1 (12.6; 15.7) | 14.2 (12.6; 15.7)    | 13.2 (11.6; 14.7) | 12.5 (10.9; 14.0) | 13.0 (11.5; 14.6) | 10.6 (8.8; 12.4)  | 13.1 (11.0; 15.2) | 12.6 (10.3; 14.8) | 10.9 (9.3; 12.4)  | 13.8 (11.6; 16.1) | 10.8 (9.2; 12.3)  | 9.5 (8.1; 11.0)   | -0.28             | 0.004   |  |
| 4-8 years               |                   |                      |                   |                   |                   |                   |                   |                   |                   |                   |                   |                   |                   |         |  |
| Total                   | 14.4 (13.6; 15.1) | 15.0 (14.2; 15.8)    | 14.7 (13.9; 15.5) | 14.3 (13.5; 15.1) | 13.6 (12.9; 14.4) | 13.5 (12.6; 14.4) | 11.4 (10.7; 12.2) | 11.7 (10.8; 12.5) | 10.4 (9.7; 11.1)  | 10.8 (10.1; 11.6) | 10.0 (9.3; 10.7)  | 10.8 (10.1; 11.5) | -0.47             | <0.001  |  |
| Female                  | 11.6 (10.6; 12.5) | 12.6 (11.7; 13.6)    | 12.7 (11.7; 13.6) | 12.2 (11.3; 13.2) | 10.9 (10.0; 11.8) | 11.3 (10.2; 12.3) | 9.5 (8.6; 10.4)   | 9.9 (8.9; 10.8)   | 8.8 (8.0; 9.6)    | 8.7 (7.8; 9.6)    | 8.0 (7.2; 8.8)    | 9.1 (8.2; 9.9)    | -0.40             | 0.001   |  |
| Male                    | 19.9 (18.5; 21.3) | 19.9 (18.4; 21.3)    | 19.0 (17.6; 20.4) | 18.6 (17.2; 20.0) | 19.0 (17.6; 20.4) | 18.1 (16.6; 19.7) | 15.7 (14.2; 17.1) | 15.7 (14.1; 17.3) | 13.7 (12.5; 15.0) | 15.1 (13.7; 16.5) | 14.2 (12.9; 15.6) | 14.6 (13.2; 16.0) | -0.59             | <0.001  |  |
| White                   | 13.7 (12.4; 15.1) | 13.2 (11.9; 14.5)    | 13.4 (12.0; 14.8) | 12.7 (11.3; 14.0) | 12.7 (11.5; 13.9) | 12.1 (10.8; 13.4) | 10.8 (9.7; 11.9)  | 10.4 (9.2; 11.7)  | 10.5 (9.4; 11.7)  | 10.5 (9.4; 11.6)  | 9.8 (8.7; 11.0)   | 10.0 (8.9; 11.1)  | -0.38             | <0.001  |  |
| Non-white               | 14.7 (13.8; 15.7) | 16.0 (15.0; 17.0)    | 15.4 (14.4; 16.4) | 15.2 (14.2; 16.1) | 14.3 (13.3; 15.3) | 14.6 (13.5; 15.8) | 12.0 (11.0; 13.0) | 12.7 (11.5; 13.8) | 10.3 (9.5; 11.2)  | 11.1 (10.1; 12.1) | 10.1 (9.2; 10.9)  | 11.3 (10.4; 12.3) | -0.54             | <0.001  |  |
| 9-11 years              |                   |                      |                   |                   |                   |                   |                   |                   |                   |                   |                   |                   |                   |         |  |
| Total                   | 12.9 (12.3; 13.6) | 11.4 (10.8; 11.9)    | 11.4 (10.9; 12.0) | 10.8 (10.3; 11.4) | 10.4 (9.9; 10.9)  | 9.5 (8.9; 10.0)   | 8.8 (8.3; 9.3)    | 8.2 (7.7; 8.8)    | 8.0 (7.6; 8.5)    | 7.7 (7.3; 8.2)    | 7.4 (7.0; 7.9)    | 7.3 (6.9; 7.7)    | -0.51             | <0.001  |  |
| Female                  | 11.2 (10.5; 12.0) | 9.6 (8.9; 10.3)      | 9.4 (8.7; 10.1)   | 9.7 (9.1; 10.4)   | 8.9 (8.2; 9.5)    | 8.0 (7.4; 8.7)    | 7.1 (6.5; 7.7)    | 7.1 (6.4; 7.7)    | 6.4 (5.9; 7.0)    | 6.7 (6.1; 7.2)    | 6.1 (5.5; 6.6)    | 5.9 (5.4; 6.4)    | -0.47             | <0.001  |  |
| Male                    | 15.9 (14.9; 16.9) | 14.4 (13.4; 15.3)    | 14.9 (13.9; 15.9) | 12.8 (11.9; 13.7) | 12.9 (12.0; 13.7) | 12.0 (11.1; 13.0) | 11.6 (10.8; 12.5) | 10.2 (9.3; 11.0)  | 10.7 (9.9; 11.5)  | 9.5 (8.7; 10.3)   | 9.7 (8.9; 10.5)   | 9.7 (8.9; 10.5)   | -0.58             | <0.001  |  |
| White                   | 13.3 (12.3; 14.3) | 12.1 (11.1; 13.1)    | 12.2 (11.3; 13.2) | 12.4 (11.4; 13.3) | 11.3 (10.4; 12.2) | 10.9 (10.0; 11.9) | 9.6 (8.8; 10.4)   | 9.4 (8.5; 10.3)   | 9.3 (8.5; 10.1)   | 8.6 (7.8; 9.3)    | 8.8 (8.0; 9.6)    | 8.5 (7.7; 9.3)    | -0.46             | <0.001  |  |
| Non-white               | 12.7 (11.9; 13.4) | 10.9 (10.2; 11.6)    | 10.9 (10.2; 11.6) | 9.8 (9.2; 10.5)   | 9.8 (9.1; 10.4)   | 8.4 (7.7; 9.0)    | 8.2 (7.6; 8.8)    | 7.4 (6.7; 8.1)    | 7.3 (6.8; 7.8)    | 7.2 (6.6; 7.8)    | 6.6 (6.1; 7.1)    | 6.5 (6.0; 7.1)    | -0.54             | <0.001  |  |
| 12 or more years        |                   |                      |                   |                   |                   |                   |                   |                   |                   |                   |                   |                   |                   |         |  |
| Total                   | 11.8 (11.1; 12.4) | 10.7 (10.0; 11.3)    | 9.9 (9.3; 10.5)   | 9.1 (8.6; 9.7)    | 9.1 (8.5; 9.6)    | 8.0 (7.4; 8.6)    | 6.8 (6.3; 7.2)    | 6.8 (6.3; 7.4)    | 6.6 (6.2; 7.0)    | 6.3 (5.9; 6.7)    | 6.2 (5.8; 6.6)    | 5.6 (5.2; 5.9)    | -0.55             | <0.001  |  |
| Female                  | 10.1 (9.3; 10.9)  | 9.4 (8.6; 10.2)      | 9.1 (8.4; 9.9)    | 8.1 (7.4; 8.8)    | 8.2 (7.5; 8.9)    | 6.8 (6.1; 7.6)    | 6.0 (5.4; 6.5)    | 6.1 (5.4; 6.8)    | 5.6 (5.1; 6.1)    | 5.0 (4.5; 5.5)    | 5.2 (4.7; 5.7)    | 4.5 (4.1; 5.0)    | -0.51             | <0.001  |  |
| Male                    | 14.3 (13.3; 15.4) | 12.7 (11.6; 13.7)    | 11.2 (10.2; 12.1) | 10.9 (9.9; 11.8)  | 10.5 (9.6; 11.4)  | 10.0 (9.1; 11.0)  | 8.2 (7.4; 8.9)    | 8.1 (7.2; 9.1)    | 8.2 (7.4; 8.9)    | 8.5 (7.8; 9.2)    | 7.9 (7.2; 8.6)    | 7.3 (6.7; 8.0)    | -0.60             | <0.001  |  |
| White                   | 12.3 (11.4; 13.1) | 12.0 (11.1; 12.9)    | 11.4 (10.5; 12.2) | 10.3 (9.5; 11.1)  | 10.0 (9.3; 10.8)  | 9.4 (8.5; 10.2)   | 7.8 (7.1; 8.5)    | 8.7 (7.8; 9.5)    | 8.0 (7.3; 8.6)    | 7.2 (6.6; 7.8)    | 7.4 (6.8; 8.0)    | 6.6 (6.1; 7.2)    | -0.52             | <0.001  |  |
| Non-white               | 11.1 (10.2; 12.1) | 9.0 (8.2; 9.8)       | 8.1 (7.4; 8.9)    | 7.7 (6.9; 8.4)    | 7.7 (6.9; 8.5)    | 6.2 (5.5; 7.0)    | 5.5 (4.9; 6.0)    | 4.6 (4.0; 5.3)    | 4.9 (4.4; 5.5)    | 5.2 (4.7; 5.7)    | 4.8 (4.3; 5.3)    | 4.4 (3.9; 4.9)    | -0.58             | <0.001  |  |

**Supplementary table 5: Age-standardized prevalence of obesity by years of education, sex and skin colour, VIGITEL 2007-2018.**

| Years of education      | Survey year (95% CI) |                   |                   |                   |                   |                   |                   |                   |                   |                   |                   |                   | Annual change (%) | p value |
|-------------------------|----------------------|-------------------|-------------------|-------------------|-------------------|-------------------|-------------------|-------------------|-------------------|-------------------|-------------------|-------------------|-------------------|---------|
| Sex and skin colour (%) | 2007                 | 2008              | 2009              | 2010              | 2011              | 2012              | 2013              | 2014              | 2015              | 2016              | 2017              | 2018              |                   |         |
| <b>0-3 years</b>        |                      |                   |                   |                   |                   |                   |                   |                   |                   |                   |                   |                   |                   |         |
| Total                   | 21.3 (19.6; 22.9)    | 23.2 (21.5; 24.9) | 22.7 (21.0; 24.5) | 22.7 (20.9; 24.4) | 24.1 (22.4; 25.7) | 25.6 (23.4; 27.7) | 23.5 (21.5; 25.4) | 26.5 (24.2; 28.8) | 26.8 (24.9; 28.6) | 27.6 (25.6; 29.6) | 27.1 (25.3; 28.9) | 28.4 (26.7; 30.2) | 0.60              | <0.001  |
| Female                  | 23.8 (21.7; 25.8)    | 26.8 (24.7; 28.9) | 25.2 (23.0; 27.4) | 25.3 (23.2; 27.5) | 27.1 (25.1; 29.2) | 28.9 (26.1; 31.6) | 26.2 (23.7; 28.7) | 29.6 (26.7; 32.5) | 29.4 (27.2; 31.7) | 30.3 (27.7; 32.8) | 29.6 (27.4; 31.9) | 31.2 (29.1; 33.4) | 0.57              | <0.001  |
| Male                    | 15.0 (12.7; 17.3)    | 14.1 (11.8; 16.3) | 16.2 (13.6; 18.9) | 15.9 (13.4; 18.4) | 16.0 (13.5; 18.4) | 16.8 (13.6; 19.9) | 17.0 (14.1; 19.8) | 18.4 (15.0; 21.7) | 19.5 (16.7; 22.3) | 21.2 (18.1; 24.3) | 20.8 (18.0; 23.6) | 21.1 (18.4; 23.8) | 0.65              | <0.001  |
| White                   | 20.5 (17.6; 23.4)    | 23.3 (20.1; 26.4) | 20.3 (17.0; 23.6) | 21.4 (18.3; 24.6) | 24.6 (21.8; 27.4) | 24.5 (21.1; 27.9) | 24.3 (21.2; 27.4) | 26.3 (22.8; 29.9) | 25.9 (22.8; 29.0) | 28.2 (25.1; 31.2) | 26.7 (23.7; 29.7) | 26.6 (23.7; 29.6) | 0.64              | <0.001  |
| Non-white               | 21.6 (19.7; 23.6)    | 23.2 (21.2; 25.2) | 23.7 (21.6; 25.8) | 23.2 (21.2; 25.3) | 23.8 (21.8; 25.8) | 26.3 (23.5; 29.2) | 22.8 (20.3; 25.4) | 26.6 (23.6; 29.7) | 27.2 (25.0; 29.5) | 27.1 (24.4; 29.8) | 27.4 (25.1; 29.6) | 29.4 (27.2; 31.6) | 0.58              | <0.001  |
| <b>4-8 years</b>        |                      |                   |                   |                   |                   |                   |                   |                   |                   |                   |                   |                   |                   |         |
| Total                   | 17.0 (16.2; 17.9)    | 18.7 (17.7; 19.6) | 19.3 (18.4; 20.3) | 20.2 (19.3; 21.1) | 20.6 (19.7; 21.6) | 22.0 (20.9; 23.1) | 22.4 (21.4; 23.4) | 22.8 (21.7; 23.9) | 23.9 (22.9; 24.8) | 24.6 (23.6; 25.6) | 23.9 (22.9; 24.8) | 24.5 (23.6; 25.5) | 0.67              | <0.001  |
| Female                  | 17.9 (16.7; 19.0)    | 20.4 (19.2; 21.7) | 20.5 (19.2; 21.7) | 21.3 (20.1; 22.5) | 22.1 (20.8; 23.3) | 23.8 (22.3; 25.2) | 23.6 (22.3; 24.9) | 24.7 (23.3; 26.2) | 25.7 (24.5; 26.9) | 25.9 (24.5; 27.2) | 24.5 (23.3; 25.7) | 26.4 (25.1; 27.6) | 0.70              | <0.001  |
| Male                    | 15.4 (14.1; 16.7)    | 15.0 (13.7; 16.2) | 16.9 (15.4; 18.3) | 17.9 (16.5; 19.2) | 17.8 (16.5; 19.1) | 18.3 (16.8; 19.9) | 19.8 (18.3; 21.4) | 18.6 (16.9; 20.3) | 20.2 (18.8; 21.6) | 22.0 (20.4; 23.6) | 22.5 (20.9; 24.1) | 20.5 (19.0; 22.0) | 0.62              | <0.001  |
| White                   | 16.7 (15.1; 18.2)    | 19.3 (17.6; 21.0) | 19.4 (17.7; 21.1) | 20.4 (18.7; 22.1) | 20.3 (18.8; 21.8) | 22.0 (20.3; 23.7) | 21.9 (20.4; 23.5) | 22.8 (21.0; 24.5) | 23.8 (22.2; 25.4) | 24.6 (23.0; 26.1) | 23.5 (21.9; 25.0) | 24.4 (22.9; 26.0) | 0.65              | <0.001  |
| Non-white               | 17.3 (16.2; 18.3)    | 18.3 (17.2; 19.5) | 19.3 (18.1; 20.4) | 20.1 (19.0; 21.2) | 20.8 (19.7; 22.0) | 22.0 (20.6; 23.4) | 22.9 (21.5; 24.2) | 22.8 (21.4; 24.3) | 24.0 (22.8; 25.1) | 24.6 (23.2; 26.0) | 24.1 (22.9; 25.4) | 24.6 (23.4; 25.9) | 0.68              | <0.001  |
| <b>9-11 years</b>       |                      |                   |                   |                   |                   |                   |                   |                   |                   |                   |                   |                   |                   |         |
| Total                   | 12.8 (12.2; 13.4)    | 13.9 (13.2; 14.5) | 14.4 (13.8; 15.1) | 16.0 (15.3; 16.6) | 16.5 (15.9; 17.1) | 17.4 (16.7; 18.1) | 17.5 (16.8; 18.1) | 18.5 (17.8; 19.3) | 18.7 (18.1; 19.3) | 19.1 (18.4; 19.8) | 18.5 (17.9; 19.2) | 19.6 (18.9; 20.2) | 0.60              | <0.001  |
| Female                  | 12.2 (11.3; 13.0)    | 13.5 (12.6; 14.3) | 14.2 (13.4; 15.1) | 15.6 (14.8; 16.5) | 16.2 (15.3; 17.0) | 17.5 (16.6; 18.4) | 17.2 (16.3; 18.0) | 18.8 (17.8; 19.8) | 19.1 (18.3; 19.9) | 19.3 (18.5; 20.2) | 18.6 (17.7; 19.4) | 19.9 (19.0; 20.7) | 0.68              | <0.001  |
| Male                    | 14.0 (13.1; 14.9)    | 14.5 (13.6; 15.4) | 14.8 (13.8; 15.7) | 16.6 (15.6; 17.6) | 17.0 (16.0; 17.9) | 17.2 (16.2; 18.3) | 17.9 (16.9; 18.9) | 18.1 (17.0; 19.2) | 18.0 (17.0; 18.9) | 18.7 (17.7; 19.7) | 18.5 (17.4; 19.5) | 19.0 (18.0; 20.1) | 0.46              | <0.001  |
| White                   | 12.8 (11.7; 13.8)    | 14.0 (12.9; 15.1) | 14.3 (13.2; 15.3) | 15.8 (14.7; 16.9) | 16.9 (15.8; 18.0) | 18.1 (16.9; 19.2) | 16.9 (15.9; 18.0) | 18.5 (17.3; 19.7) | 18.1 (17.1; 19.2) | 18.4 (17.4; 19.5) | 17.6 (16.6; 18.6) | 18.9 (17.8; 20.0) | 0.52              | 0.001   |
| Non-white               | 12.9 (12.1; 13.6)    | 13.8 (13.0; 14.6) | 14.5 (13.8; 15.3) | 16.1 (15.3; 16.9) | 16.2 (15.4; 17.0) | 16.9 (16.0; 17.8) | 17.9 (17.0; 18.7) | 18.6 (17.6; 19.5) | 19.0 (18.2; 19.8) | 19.6 (18.7; 20.4) | 19.1 (18.3; 19.9) | 20.0 (19.1; 20.8) | 0.64              | <0.001  |
| <b>12 or more years</b> |                      |                   |                   |                   |                   |                   |                   |                   |                   |                   |                   |                   |                   |         |
| Total                   | 11.6 (11.0; 12.3)    | 11.5 (10.9; 12.1) | 12.8 (12.1; 13.4) | 13.3 (12.7; 13.9) | 14.7 (14.1; 15.4) | 14.9 (14.2; 15.6) | 15.2 (14.6; 15.8) | 15.0 (14.2; 15.7) | 15.1 (14.6; 15.7) | 15.6 (15.1; 16.2) | 16.1 (15.5; 16.7) | 16.8 (16.2; 17.4) | 0.46              | <0.001  |
| Female                  | 9.4 (8.6; 10.2)      | 9.4 (8.6; 10.1)   | 11.3 (10.5; 12.2) | 12.0 (11.2; 12.8) | 13.0 (12.1; 13.8) | 13.7 (12.8; 14.6) | 12.7 (12.0; 13.5) | 13.5 (12.6; 14.4) | 13.5 (12.8; 14.2) | 13.8 (13.1; 14.5) | 14.3 (13.6; 15.0) | 15.1 (14.3; 15.8) | 0.48              | <0.001  |
| Male                    | 15.1 (14.0; 16.1)    | 14.9 (13.8; 16.0) | 15.0 (14.0; 16.1) | 15.6 (14.6; 16.6) | 17.6 (16.6; 18.7) | 17.0 (15.9; 18.1) | 19.5 (18.4; 20.5) | 17.5 (16.3; 18.7) | 17.8 (16.8; 18.8) | 18.6 (17.6; 19.6) | 19.2 (18.2; 20.1) | 19.7 (18.7; 20.7) | 0.45              | <0.001  |
| White                   | 11.2 (10.4; 12.1)    | 11.1 (10.3; 12.0) | 12.2 (11.3; 13.1) | 12.8 (12.0; 13.7) | 14.1 (13.2; 15.0) | 14.4 (13.5; 15.4) | 14.9 (14.1; 15.7) | 14.5 (13.5; 15.5) | 14.7 (13.9; 15.5) | 15.1 (14.3; 15.8) | 14.9 (14.1; 15.7) | 16.1 (15.3; 16.9) | 0.43              | <0.001  |
| Non-white               | 12.2 (11.2; 13.2)    | 12.0 (11.1; 12.9) | 13.5 (12.5; 14.5) | 13.9 (13.0; 14.8) | 15.5 (14.5; 16.5) | 15.5 (14.4; 16.5) | 15.6 (14.7; 16.5) | 15.5 (14.5; 16.6) | 15.6 (14.8; 16.4) | 16.3 (15.5; 17.2) | 17.4 (16.6; 18.3) | 17.6 (16.7; 18.4) | 0.48              | <0.001  |
